# Supplementary material for: Qualitative and Quantitative Protein Complex Prediction Through Proteome-Wide Simulations
Source: PLoS Comput Biol. 2015 Oct 22;11(10):e1004424. doi: 10.1371/journal.pcbi.1004424 (PMC4619657; doi:10.1371/journal.pcbi.1004424)
Supplement: S2 Table — (XLSX) [file pcbi.1004424.s002.xlsx]

## Sheet: SiComPre Cl.
Complex ID	Size	List of proteins	Quantitative prediction	Abundance Sim 1	Abundance Sim 2	Average size of simulated complexes	Best matching reference complex	Matching thr	Size of reference complex	Best matching CORUM complex	Matching thr	Length of CORUM complex	Fraction of fictitious domains	Functional Enrichment
657	2	P15311, P52824,	0	0	0	0	(C-CFTR)2-NHERF-ezrin_complex::C-CFTR-NHERF(PDZ1_domain)-ezrin_complex::C-CFTR-NHERF(PDZ2_domain)-ezrin_complex::CFTR-NHERF-beta(2)AR_signaling_complex	0.125	4	C-CFTR-NHERF(PDZ2 domain)-ezrin complex	0.1667	3	1	phospholipase binding: 0.002228	diacylglycerol kinase activity: 0.002953	NAD+ kinase activity: 0.003388	cell adhesion molecule binding: 0.004595	activating transcription factor binding: 0.004692	kinase binding: 0.00739	actin filament binding: 0.01611	actin binding: 0.05292
778	2	O14745, P23396,	0	0	0	0	(C-CFTR)2-NHERF-ezrin_complex::C-CFTR-NHERF(PDZ1_domain)-ezrin_complex::C-CFTR-NHERF(PDZ2_domain)-ezrin_complex::CFTR-NHERF-beta(2)AR_signaling_complex	0.125	4	CFTR-NHERF-beta(2)AR signaling complex	0.1667	3	0	dopamine receptor binding: 9.696e-05	beta-2 adrenergic receptor binding: 0.0002908	growth factor receptor binding: 0.0003393	chloride channel regulator activity: 0.0007269	protein kinase A binding: 0.001841	DNA N-glycosylase activity: 0.001986	DNA-(apurinic or apyrimidinic site) lyase activity: 0.002276	iron-sulfur cluster binding: 0.003436	NF-kappaB binding: 0.003774	protein self-association: 0.004305	phosphatase binding: 0.005897	endonuclease activity: 0.006572	PDZ domain binding: 0.009841	damaged DNA binding: 0.01209	beta-catenin binding: 0.01219	mRNA binding: 0.01348	structural constituent of ribosome: 0.02414	enzyme binding: 0.0378	receptor binding: 0.03901	protein kinase binding: 0.04735	RNA binding: 0.09431
17	22	Q07955, O43290, P09661, P52272, Q15029, Q01081, Q15459, P61978, Q9UMS4, P17844, O75533, O94906, O43390, O75643, Q99459, Q00839, P26368, P62316, P62314, Q6P2Q9, Q13243, P23246,	0	0	0	0	(E.F.G)_complex::12S_U11_snRNP::6S_methyltransferase_and_RG-containing_Sm_proteins_complex::20S_methylosome-SmD_complex::20S_methylosome_and_RG-containing_Sm_protein_complex::6S_methyltransferase_complex::JBP1-pICln_complex::SMN_complex,_U7_snRNA_specific::20S_methyltransferase_complex::AR_coactivator_complex::17S_U2_snRNP::SF3A1-SF3A2-SF3A3_complex::SF3b_complex::Exon_junction_complex::SRm160/30…	0.0898	245	C complex spliceosome	0.2051	80	0.5	RNA binding: 3.102e-15	protein binding: 6.251e-09	RS domain binding: 2.009e-07	nucleotide binding: 1.539e-06	ATP-dependent RNA helicase activity: 0.0008881	WD40-repeat domain binding: 0.001598	U5 snRNA binding: 0.00213	androgen receptor binding: 0.003354	ATP-dependent helicase activity: 0.008179	pre-mRNA binding: 0.01161	ubiquitin-ubiquitin ligase activity: 0.01317	U6 snRNA binding: 0.01421	RNA helicase activity: 0.01473	nucleic acid binding: 0.01729	C2H2 zinc finger domain binding: 0.02091	ribonucleoprotein complex binding: 0.03105	estrogen receptor binding: 0.04147	transcription coactivator activity: 0.04422	enzyme binding: 0.05811	RNA polymerase II core promoter proximal region sequence-specific DNA binding: 0.06538	calcium-dependent protein binding: 0.06816	transcription cofactor activity: 0.09157	chromatin binding: 0.09212
41	22	Q07955, O43290, P09661, P52272, Q15029, Q01081, P23246, Q9UMS4, P17844, O75533, O94906, O43395, O43390, O75643, P07910, Q99459, P26368, P62316, P62314, Q6P2Q9, Q13243, Q15459,	0	0	0	0	(E.F.G)_complex::12S_U11_snRNP::6S_methyltransferase_and_RG-containing_Sm_proteins_complex::20S_methylosome-SmD_complex::20S_methylosome_and_RG-containing_Sm_protein_complex::6S_methyltransferase_complex::JBP1-pICln_complex::SMN_complex,_U7_snRNA_specific::20S_methyltransferase_complex::AR_coactivator_complex::17S_U2_snRNP::SF3A1-SF3A2-SF3A3_complex::SF3b_complex::Exon_junction_complex::SRm160/30…	0.0898	245	C complex spliceosome	0.1841	80	0.486842	RNA binding: 1.121e-13	protein binding: 6.251e-09	nucleotide binding: 8.316e-08	RS domain binding: 2.009e-07	ATP-dependent RNA helicase activity: 0.0008881	WD40-repeat domain binding: 0.001598	U5 snRNA binding: 0.00213	androgen receptor binding: 0.003354	nucleic acid binding: 0.004017	identical protein binding: 0.006291	ATP-dependent helicase activity: 0.008179	pre-mRNA binding: 0.01161	ubiquitin-ubiquitin ligase activity: 0.01317	U6 snRNA binding: 0.01421	RNA helicase activity: 0.01473	C2H2 zinc finger domain binding: 0.02091	ribonucleoprotein complex binding: 0.03105	estrogen receptor binding: 0.04147	transcription coactivator activity: 0.04422	enzyme binding: 0.05811	calcium-dependent protein binding: 0.06816	transcription cofactor activity: 0.09157	chromatin binding: 0.09212
60	22	Q07955, O43290, P09661, P52272, Q15029, Q01081, Q15459, Q9UMS4, P17844, O75533, O94906, O43395, O43390, P38919, O75643, Q99459, P26368, P62316, P62314, Q6P2Q9, Q13243, P23246,	0	0	0	0	(E.F.G)_complex::12S_U11_snRNP::6S_methyltransferase_and_RG-containing_Sm_proteins_complex::20S_methylosome-SmD_complex::20S_methylosome_and_RG-containing_Sm_protein_complex::6S_methyltransferase_complex::JBP1-pICln_complex::SMN_complex,_U7_snRNA_specific::20S_methyltransferase_complex::AR_coactivator_complex::17S_U2_snRNP::SF3A1-SF3A2-SF3A3_complex::SF3b_complex::Exon_junction_complex::SRm160/30…	0.0898	245	C complex spliceosome	0.1841	80	0.486842	RNA binding: 3.362e-12	protein binding: 6.251e-09	RS domain binding: 2.009e-07	nucleotide binding: 1.539e-06	ATP-dependent RNA helicase activity: 1.165e-05	ATP-dependent helicase activity: 0.000346	WD40-repeat domain binding: 0.001598	U5 snRNA binding: 0.00213	androgen receptor binding: 0.003354	nucleic acid binding: 0.004017	pre-mRNA binding: 0.01161	ubiquitin-ubiquitin ligase activity: 0.01317	U6 snRNA binding: 0.01421	RNA helicase activity: 0.01473	C2H2 zinc finger domain binding: 0.02091	poly(A) RNA binding: 0.02651	ribonucleoprotein complex binding: 0.03105	identical protein binding: 0.0356	estrogen receptor binding: 0.04147	transcription coactivator activity: 0.04422	enzyme binding: 0.05811	calcium-dependent protein binding: 0.06816	transcription cofactor activity: 0.09157	chromatin binding: 0.09212
81	22	Q07955, O43290, P09661, P52272, Q15029, Q01081, Q15459, P61978, Q9UMS4, P17844, O75533, O43390, P08621, O75643, Q99459, Q00839, P26368, O60506, P62316, P62314, Q6P2Q9, P23246,	0	0	0	0	(E.F.G)_complex::12S_U11_snRNP::6S_methyltransferase_and_RG-containing_Sm_proteins_complex::20S_methylosome-SmD_complex::20S_methylosome_and_RG-containing_Sm_protein_complex::6S_methyltransferase_complex::JBP1-pICln_complex::SMN_complex,_U7_snRNA_specific::20S_methyltransferase_complex::AR_coactivator_complex::17S_U2_snRNP::SF3A1-SF3A2-SF3A3_complex::SF3b_complex::Exon_junction_complex::SRm160/30…	0.0898	245	C complex spliceosome	0.2051	80	0.463087	RNA binding: 3.102e-15	protein binding: 6.251e-09	nucleotide binding: 8.316e-08	RS domain binding: 6.21e-05	ATP-dependent RNA helicase activity: 0.0008881	WD40-repeat domain binding: 0.001598	U5 snRNA binding: 0.00213	ATP-dependent helicase activity: 0.008179	pre-mRNA binding: 0.01161	ubiquitin-ubiquitin ligase activity: 0.01317	U6 snRNA binding: 0.01421	RNA helicase activity: 0.01473	nucleic acid binding: 0.01729	C2H2 zinc finger domain binding: 0.02091	poly(A) RNA binding: 0.02651	estrogen receptor binding: 0.04147	enzyme binding: 0.05811	RNA polymerase II core promoter proximal region sequence-specific DNA binding: 0.06538	calcium-dependent protein binding: 0.06816	androgen receptor binding: 0.08048	transcription cofactor activity: 0.09157	chromatin binding: 0.09212
84	22	Q07955, O43290, P09661, P52272, Q9Y3B4, Q15029, Q01081, Q15459, Q9UMS4, P17844, O75533, O94906, O43390, O75643, Q99459, Q00839, P26368, P62316, P62314, Q6P2Q9, Q13243, P23246,	0	0	0	0	(E.F.G)_complex::12S_U11_snRNP::6S_methyltransferase_and_RG-containing_Sm_proteins_complex::20S_methylosome-SmD_complex::20S_methylosome_and_RG-containing_Sm_protein_complex::6S_methyltransferase_complex::JBP1-pICln_complex::SMN_complex,_U7_snRNA_specific::20S_methyltransferase_complex::AR_coactivator_complex::17S_U2_snRNP::SF3A1-SF3A2-SF3A3_complex::SF3b_complex::Exon_junction_complex::SRm160/30…	0.0898	245	C complex spliceosome	0.1841	80	0.447368	RNA binding: 3.102e-15	nucleotide binding: 8.316e-08	protein binding: 1.871e-07	RS domain binding: 2.009e-07	ATP-dependent RNA helicase activity: 0.0008881	WD40-repeat domain binding: 0.001598	U5 snRNA binding: 0.00213	androgen receptor binding: 0.003354	ATP-dependent helicase activity: 0.008179	pre-mRNA binding: 0.01161	ubiquitin-ubiquitin ligase activity: 0.01317	U6 snRNA binding: 0.01421	RNA helicase activity: 0.01473	nucleic acid binding: 0.01729	C2H2 zinc finger domain binding: 0.02091	ribonucleoprotein complex binding: 0.03105	estrogen receptor binding: 0.04147	transcription coactivator activity: 0.04422	enzyme binding: 0.05811	calcium-dependent protein binding: 0.06816	transcription cofactor activity: 0.09157	chromatin binding: 0.09212
151	22	Q07955, O43290, P09661, P52272, Q15029, Q01081, Q15459, P61978, Q9UMS4, P17844, O75533, O43390, O00571, O75643, Q99459, P26368, O60506, P62316, P62314, Q6P2Q9, Q13243, P23246,	0	0	0	0	(E.F.G)_complex::12S_U11_snRNP::6S_methyltransferase_and_RG-containing_Sm_proteins_complex::20S_methylosome-SmD_complex::20S_methylosome_and_RG-containing_Sm_protein_complex::6S_methyltransferase_complex::JBP1-pICln_complex::SMN_complex,_U7_snRNA_specific::20S_methyltransferase_complex::AR_coactivator_complex::17S_U2_snRNP::SF3A1-SF3A2-SF3A3_complex::SF3b_complex::Exon_junction_complex::SRm160/30…	0.0898	245	C complex spliceosome	0.1841	80	0.468531	RNA binding: 3.102e-15	protein binding: 6.251e-09	nucleotide binding: 8.316e-08	RS domain binding: 2.009e-07	ATP-dependent RNA helicase activity: 1.165e-05	poly(A) RNA binding: 0.000338	WD40-repeat domain binding: 0.001598	U5 snRNA binding: 0.00213	RNA stem-loop binding: 0.003191	mRNA 5'-UTR binding: 0.005836	helicase activity: 0.005882	eukaryotic initiation factor 4E binding: 0.006363	ATP-dependent helicase activity: 0.008179	pre-mRNA binding: 0.01161	ubiquitin-ubiquitin ligase activity: 0.01317	ribosomal small subunit binding: 0.01317	U6 snRNA binding: 0.01421	RNA helicase activity: 0.01473	translation initiation factor binding: 0.0168	nucleic acid binding: 0.01729	C2H2 zinc finger domain binding: 0.02091	estrogen receptor binding: 0.04147	ATP-dependent DNA helicase activity: 0.0531	enzyme binding: 0.05811	RNA polymerase II core promoter proximal region sequence-specific DNA binding: 0.06538	calcium-dependent protein binding: 0.06816	androgen receptor binding: 0.08048	transcription cofactor activity: 0.09157	chromatin binding: 0.09212
158	22	Q07955, O43290, P09661, P52272, Q15029, Q01081, Q15459, P11387, Q9UMS4, P17844, O75533, O94906, O43390, O75643, P07910, Q99459, P26368, P62316, P62314, Q6P2Q9, Q13243, P23246,	0	0	0	0	(E.F.G)_complex::12S_U11_snRNP::6S_methyltransferase_and_RG-containing_Sm_proteins_complex::20S_methylosome-SmD_complex::20S_methylosome_and_RG-containing_Sm_protein_complex::6S_methyltransferase_complex::JBP1-pICln_complex::SMN_complex,_U7_snRNA_specific::20S_methyltransferase_complex::AR_coactivator_complex::17S_U2_snRNP::SF3A1-SF3A2-SF3A3_complex::SF3b_complex::Exon_junction_complex::SRm160/30…	0.0898	245	C complex spliceosome	0.1841	80	0.479167	RNA binding: 1.121e-13	protein binding: 6.251e-09	nucleotide binding: 8.316e-08	RS domain binding: 2.009e-07	ATP-dependent RNA helicase activity: 0.0008881	WD40-repeat domain binding: 0.001598	U5 snRNA binding: 0.00213	androgen receptor binding: 0.003354	nucleic acid binding: 0.004017	ATP-dependent helicase activity: 0.008179	DNA topoisomerase type II (ATP-hydrolyzing) activity: 0.01056	pre-mRNA binding: 0.01161	ubiquitin-ubiquitin ligase activity: 0.01317	U6 snRNA binding: 0.01421	RNA helicase activity: 0.01473	chromatin binding: 0.01636	DNA topoisomerase type I activity: 0.01834	C2H2 zinc finger domain binding: 0.02091	ribonucleoprotein complex binding: 0.03105	identical protein binding: 0.0356	estrogen receptor binding: 0.04147	transcription coactivator activity: 0.04422	enzyme binding: 0.05811	calcium-dependent protein binding: 0.06816	transcription cofactor activity: 0.09157
282	22	Q07955, O43290, P09661, P52272, Q15029, O14776, Q01081, Q15459, Q9UMS4, P17844, O75533, O94906, O43395, O43390, O75643, Q99459, P26368, P62316, P62314, Q6P2Q9, Q13243, P23246,	0	0	0	0	(E.F.G)_complex::12S_U11_snRNP::6S_methyltransferase_and_RG-containing_Sm_proteins_complex::20S_methylosome-SmD_complex::20S_methylosome_and_RG-containing_Sm_protein_complex::6S_methyltransferase_complex::JBP1-pICln_complex::SMN_complex,_U7_snRNA_specific::20S_methyltransferase_complex::AR_coactivator_complex::17S_U2_snRNP::SF3A1-SF3A2-SF3A3_complex::SF3b_complex::Exon_junction_complex::SRm160/30…	0.0898	245	C complex spliceosome	0.1642	80	0.489796	RNA binding: 3.362e-12	protein binding: 6.251e-09	RS domain binding: 2.009e-07	nucleotide binding: 1.539e-06	ATP-dependent RNA helicase activity: 0.0008881	WD40-repeat domain binding: 0.001598	U5 snRNA binding: 0.00213	androgen receptor binding: 0.003354	transcription coactivator activity: 0.004876	ATP-dependent helicase activity: 0.008179	pre-mRNA binding: 0.01161	ubiquitin-ubiquitin ligase activity: 0.01317	U6 snRNA binding: 0.01421	RNA helicase activity: 0.01473	nucleic acid binding: 0.01729	C2H2 zinc finger domain binding: 0.02091	ribonucleoprotein complex binding: 0.03105	proline-rich region binding: 0.03155	identical protein binding: 0.0356	estrogen receptor binding: 0.04147	RNA polymerase II transcription corepressor activity: 0.04147	RNA polymerase II repressing transcription factor binding: 0.04781	enzyme binding: 0.05811	calcium-dependent protein binding: 0.06816	transcription cofactor activity: 0.09157	chromatin binding: 0.09212
1683	22	Q07955, Q9NR30, O43290, P09661, P52272, Q15029, Q01081, P23246, P61978, Q9UMS4, O75533, O94906, O43390, O75643, Q99459, Q00839, P26368, P62316, P62314, Q6P2Q9, Q13243, Q15459,	0.25	0	1	244	(E.F.G)_complex::12S_U11_snRNP::6S_methyltransferase_and_RG-containing_Sm_proteins_complex::20S_methylosome-SmD_complex::20S_methylosome_and_RG-containing_Sm_protein_complex::6S_methyltransferase_complex::JBP1-pICln_complex::SMN_complex,_U7_snRNA_specific::20S_methyltransferase_complex::AR_coactivator_complex::17S_U2_snRNP::SF3A1-SF3A2-SF3A3_complex::SF3b_complex::Exon_junction_complex::SRm160/30…	0.0898	245	C complex spliceosome	0.1841	80	0.510345	RNA binding: 3.102e-15	protein binding: 1.871e-07	RS domain binding: 2.009e-07	nucleotide binding: 1.539e-06	ATP-dependent RNA helicase activity: 0.0008881	WD40-repeat domain binding: 0.001598	U5 snRNA binding: 0.00213	ubiquitin-ubiquitin ligase activity: 0.01317	U6 snRNA binding: 0.01421	C2H2 zinc finger domain binding: 0.02091	ribonucleoprotein complex binding: 0.03105	double-stranded RNA binding: 0.05022	nucleic acid binding: 0.05855	RNA polymerase II core promoter proximal region sequence-specific DNA binding: 0.06538	androgen receptor binding: 0.08048	chromatin binding: 0.09212
35	21	Q00839, P26368, Q15029, O60506, Q07955, O75533, Q15459, P62314, P61978, O43390, Q6P2Q9, P62316, O43290, P09661, Q01081, O75643, P23246, P17844, Q99459, P52272, Q9UMS4,	0	0	0	0	(E.F.G)_complex::12S_U11_snRNP::6S_methyltransferase_and_RG-containing_Sm_proteins_complex::20S_methylosome-SmD_complex::20S_methylosome_and_RG-containing_Sm_protein_complex::6S_methyltransferase_complex::JBP1-pICln_complex::SMN_complex,_U7_snRNA_specific::20S_methyltransferase_complex::AR_coactivator_complex::17S_U2_snRNP::SF3A1-SF3A2-SF3A3_complex::SF3b_complex::Exon_junction_complex::SRm160/30…	0.0857	245	C complex spliceosome	0.2149	80	0.482014	RNA binding: 4.289e-14	protein binding: 1.476e-08	nucleotide binding: 1.08e-06	RS domain binding: 5.648e-05	ATP-dependent RNA helicase activity: 0.000809	WD40-repeat domain binding: 0.001526	U5 snRNA binding: 0.002033	ATP-dependent helicase activity: 0.007482	pre-mRNA binding: 0.01109	ubiquitin-ubiquitin ligase activity: 0.01258	U6 snRNA binding: 0.01357	RNA helicase activity: 0.01407	C2H2 zinc finger domain binding: 0.01998	poly(A) RNA binding: 0.02534	estrogen receptor binding: 0.03966	nucleic acid binding: 0.05184	enzyme binding: 0.05386	RNA polymerase II core promoter proximal region sequence-specific DNA binding: 0.0626	calcium-dependent protein binding: 0.06528	androgen receptor binding: 0.07712	chromatin binding: 0.08597	transcription cofactor activity: 0.08781
87	21	Q15393, Q00839, P26368, Q15029, Q07955, O75533, Q15459, P62314, P61978, O43390, Q6P2Q9, P62316, O43290, P09661, Q01081, O75643, Q9UMS4, P23246, P17844, P52272, Q99459,	0	0	0	0	(E.F.G)_complex::12S_U11_snRNP::6S_methyltransferase_and_RG-containing_Sm_proteins_complex::20S_methylosome-SmD_complex::20S_methylosome_and_RG-containing_Sm_protein_complex::6S_methyltransferase_complex::JBP1-pICln_complex::SMN_complex,_U7_snRNA_specific::20S_methyltransferase_complex::AR_coactivator_complex::17S_U2_snRNP::SF3A1-SF3A2-SF3A3_complex::SF3b_complex::Exon_junction_complex::SRm160/30…	0.0857	245	C complex spliceosome	0.2149	80	0.5	RNA binding: 1.447e-12	protein binding: 4.217e-07	nucleotide binding: 1.747e-05	RS domain binding: 5.648e-05	ATP-dependent RNA helicase activity: 0.000809	WD40-repeat domain binding: 0.001526	U5 snRNA binding: 0.002033	ATP-dependent helicase activity: 0.007482	pre-mRNA binding: 0.01109	ubiquitin-ubiquitin ligase activity: 0.01258	U6 snRNA binding: 0.01357	RNA helicase activity: 0.01407	nucleic acid binding: 0.01446	C2H2 zinc finger domain binding: 0.01998	estrogen receptor binding: 0.03966	enzyme binding: 0.05386	RNA polymerase II core promoter proximal region sequence-specific DNA binding: 0.0626	calcium-dependent protein binding: 0.06528	androgen receptor binding: 0.07712	chromatin binding: 0.08597	transcription cofactor activity: 0.08781
97	21	Q00839, P26368, Q15029, Q9UKM9, P38159, Q07955, O75533, Q15459, P62314, P61978, O43390, Q6P2Q9, O43290, P09661, Q01081, O75643, P23246, P07910, Q99459, P52272, Q9UMS4,	0	0	0	0	(E.F.G)_complex::12S_U11_snRNP::6S_methyltransferase_and_RG-containing_Sm_proteins_complex::20S_methylosome-SmD_complex::20S_methylosome_and_RG-containing_Sm_protein_complex::6S_methyltransferase_complex::JBP1-pICln_complex::SMN_complex,_U7_snRNA_specific::20S_methyltransferase_complex::AR_coactivator_complex::17S_U2_snRNP::SF3A1-SF3A2-SF3A3_complex::SF3b_complex::Exon_junction_complex::SRm160/30…	0.0857	245	C complex spliceosome	0.2149	80	0.527132	RNA binding: 2.018e-17	nucleotide binding: 2.264e-09	protein binding: 4.217e-07	RS domain binding: 5.648e-05	WD40-repeat domain binding: 0.001526	U5 snRNA binding: 0.002033	nucleic acid binding: 0.003161	mRNA binding: 0.008477	ubiquitin-ubiquitin ligase activity: 0.01258	U6 snRNA binding: 0.01357	chromatin binding: 0.01451	C2H2 zinc finger domain binding: 0.01998	core promoter binding: 0.02727	identical protein binding: 0.03189	ATP-dependent RNA helicase activity: 0.0406	single-stranded RNA binding: 0.04388	RNA polymerase II core promoter proximal region sequence-specific DNA binding: 0.0626
155	21	Q00839, P26368, Q13148, O60506, Q07955, O75533, Q15459, P62314, P61978, O43390, Q6P2Q9, P62316, O43290, P09661, Q01081, O75643, P23246, Q15029, P17844, P52272, Q99459,	0	0	0	0	(E.F.G)_complex::12S_U11_snRNP::6S_methyltransferase_and_RG-containing_Sm_proteins_complex::20S_methylosome-SmD_complex::20S_methylosome_and_RG-containing_Sm_protein_complex::6S_methyltransferase_complex::JBP1-pICln_complex::SMN_complex,_U7_snRNA_specific::20S_methyltransferase_complex::AR_coactivator_complex::17S_U2_snRNP::SF3A1-SF3A2-SF3A3_complex::SF3b_complex::Exon_junction_complex::SRm160/30…	0.0857	245	C complex spliceosome	0.1929	80	0.519084	RNA binding: 1.038e-15	protein binding: 1.476e-08	nucleotide binding: 5.444e-08	RS domain binding: 5.648e-05	ATP-dependent RNA helicase activity: 0.000809	WD40-repeat domain binding: 0.001526	U5 snRNA binding: 0.002033	ATP-dependent helicase activity: 0.007482	pre-mRNA binding: 0.01109	U6 snRNA binding: 0.01357	RNA helicase activity: 0.01407	nucleic acid binding: 0.01446	C2H2 zinc finger domain binding: 0.01998	poly(A) RNA binding: 0.02534	estrogen receptor binding: 0.03966	mRNA 3'-UTR binding: 0.04574	enzyme binding: 0.05386	RNA polymerase II core promoter proximal region sequence-specific DNA binding: 0.0626	calcium-dependent protein binding: 0.06528	androgen receptor binding: 0.07712	chromatin binding: 0.08597	transcription cofactor activity: 0.08781
129	22	Q53GS9, Q07955, O43290, P09661, P52272, Q9BYV6, Q15029, Q01081, Q15459, Q9UMS4, O75533, O43390, O75643, P07910, Q99459, Q00839, P26368, P62314, Q6P2Q9, Q13243, P23246, Q16629,	0	0	0	0	(E.F.G)_complex::12S_U11_snRNP::6S_methyltransferase_and_RG-containing_Sm_proteins_complex::20S_methylosome-SmD_complex::20S_methylosome_and_RG-containing_Sm_protein_complex::6S_methyltransferase_complex::JBP1-pICln_complex::SMN_complex,_U7_snRNA_specific::20S_methyltransferase_complex::AR_coactivator_complex::17S_U2_snRNP::SF3A1-SF3A2-SF3A3_complex::SF3b_complex::Exon_junction_complex::SRm160/30…	0.0818	245	C complex spliceosome	0.1455	80	0.435714	RNA binding: 3.102e-15	nucleotide binding: 3.725e-09	RS domain binding: 2.009e-07	protein binding: 2.674e-06	WD40-repeat domain binding: 0.001598	U5 snRNA binding: 0.00213	nucleic acid binding: 0.004017	identical protein binding: 0.006291	ubiquitin-ubiquitin ligase activity: 0.01317	U6 snRNA binding: 0.01421	C2H2 zinc finger domain binding: 0.02091	ATP-dependent RNA helicase activity: 0.04245	chromatin binding: 0.09212
134	22	Q07955, O43290, P09661, P52272, Q15029, Q01081, Q15459, P61978, Q9UMS4, P17844, O75533, O94906, O43390, O75643, Q99459, P26368, P62316, P62314, Q6P2Q9, Q13243, Q5BKZ1, P23246,	0	0	0	0	(E.F.G)_complex::12S_U11_snRNP::6S_methyltransferase_and_RG-containing_Sm_proteins_complex::20S_methylosome-SmD_complex::20S_methylosome_and_RG-containing_Sm_protein_complex::6S_methyltransferase_complex::JBP1-pICln_complex::SMN_complex,_U7_snRNA_specific::20S_methyltransferase_complex::AR_coactivator_complex::17S_U2_snRNP::SF3A1-SF3A2-SF3A3_complex::SF3b_complex::Exon_junction_complex::SRm160/30…	0.0818	245	C complex spliceosome	0.1841	80	0.506849	RNA binding: 1.121e-13	protein binding: 6.251e-09	RS domain binding: 2.009e-07	nucleotide binding: 1.539e-06	ATP-dependent RNA helicase activity: 0.0008881	WD40-repeat domain binding: 0.001598	U5 snRNA binding: 0.00213	androgen receptor binding: 0.003354	ATP-dependent helicase activity: 0.008179	pre-mRNA binding: 0.01161	ubiquitin-ubiquitin ligase activity: 0.01317	U6 snRNA binding: 0.01421	RNA helicase activity: 0.01473	RNA polymerase II core binding: 0.01628	nucleic acid binding: 0.01729	C2H2 zinc finger domain binding: 0.02091	ribonucleoprotein complex binding: 0.03105	estrogen receptor binding: 0.04147	transcription coactivator activity: 0.04422	enzyme binding: 0.05811	RNA polymerase II core promoter proximal region sequence-specific DNA binding: 0.06538	calcium-dependent protein binding: 0.06816	transcription cofactor activity: 0.09157	chromatin binding: 0.09212
166	22	Q07955, O43290, P09661, P52272, Q15029, Q01081, Q15459, Q9UMS4, O75533, O94906, O43390, O75643, P07910, Q99459, Q00839, P26368, Q13595, P62316, P62314, Q6P2Q9, Q13243, P23246,	0	0	0	0	(E.F.G)_complex::12S_U11_snRNP::6S_methyltransferase_and_RG-containing_Sm_proteins_complex::20S_methylosome-SmD_complex::20S_methylosome_and_RG-containing_Sm_protein_complex::6S_methyltransferase_complex::JBP1-pICln_complex::SMN_complex,_U7_snRNA_specific::20S_methyltransferase_complex::AR_coactivator_complex::17S_U2_snRNP::SF3A1-SF3A2-SF3A3_complex::SF3b_complex::Exon_junction_complex::SRm160/30…	0.0818	245	C complex spliceosome	0.1841	80	0.472973	RNA binding: 7.034e-17	nucleotide binding: 3.725e-09	protein binding: 1.871e-07	RS domain binding: 2.009e-07	WD40-repeat domain binding: 0.001598	U5 snRNA binding: 0.00213	nucleic acid binding: 0.004017	ubiquitin-ubiquitin ligase activity: 0.01317	U6 snRNA binding: 0.01421	C2H2 zinc finger domain binding: 0.02091	ribonucleoprotein complex binding: 0.03105	identical protein binding: 0.0356	ATP-dependent RNA helicase activity: 0.04245	androgen receptor binding: 0.08048	chromatin binding: 0.09212
215	22	Q07955, O43290, P09661, P52272, Q15029, Q01081, P23246, Q9UMS4, P17844, O75533, O94906, O43395, O43390, O75643, Q99459, P62072, P26368, P62316, P62314, Q6P2Q9, Q13243, Q15459,	0	0	0	0	(E.F.G)_complex::12S_U11_snRNP::6S_methyltransferase_and_RG-containing_Sm_proteins_complex::20S_methylosome-SmD_complex::20S_methylosome_and_RG-containing_Sm_protein_complex::6S_methyltransferase_complex::JBP1-pICln_complex::SMN_complex,_U7_snRNA_specific::20S_methyltransferase_complex::AR_coactivator_complex::17S_U2_snRNP::SF3A1-SF3A2-SF3A3_complex::SF3b_complex::Exon_junction_complex::SRm160/30…	0.0818	245	C complex spliceosome	0.1642	80	0.503401	RNA binding: 3.362e-12	protein binding: 6.251e-09	RS domain binding: 2.009e-07	nucleotide binding: 1.539e-06	ATP-dependent RNA helicase activity: 0.0008881	WD40-repeat domain binding: 0.001598	U5 snRNA binding: 0.00213	androgen receptor binding: 0.003354	ATP-dependent helicase activity: 0.008179	pre-mRNA binding: 0.01161	ubiquitin-ubiquitin ligase activity: 0.01317	U6 snRNA binding: 0.01421	RNA helicase activity: 0.01473	nucleic acid binding: 0.01729	C2H2 zinc finger domain binding: 0.02091	ribonucleoprotein complex binding: 0.03105	identical protein binding: 0.0356	estrogen receptor binding: 0.04147	transcription coactivator activity: 0.04422	enzyme binding: 0.05811	chaperone binding: 0.06631	calcium-dependent protein binding: 0.06816	transcription cofactor activity: 0.09157	chromatin binding: 0.09212
46	20	Q00839, P26368, Q07955, P62318, Q01081, P62316, Q15459, P62314, Q6P2Q9, O75533, O43290, P09661, P23246, O75643, Q9UMS4, Q15029, P17844, P52272, Q99459, O94906,	0	0	0	0	(E.F.G)_complex::12S_U11_snRNP::6S_methyltransferase_and_RG-containing_Sm_proteins_complex::20S_methylosome-SmD_complex::20S_methylosome_and_RG-containing_Sm_protein_complex::6S_methyltransferase_complex::JBP1-pICln_complex::SMN_complex,_U7_snRNA_specific::20S_methyltransferase_complex::AR_coactivator_complex::17S_U2_snRNP::SF3A1-SF3A2-SF3A3_complex::SF3b_complex::Exon_junction_complex::SRm160/30…	0.0816	245	C complex spliceosome	0.2025	80	0.40458	RNA binding: 1.815e-11	protein binding: 3.484e-08	RS domain binding: 5.113e-05	nucleotide binding: 0.0001779	ATP-dependent RNA helicase activity: 0.0007334	WD40-repeat domain binding: 0.001453	U5 snRNA binding: 0.001936	androgen receptor binding: 0.00278	histone pre-mRNA DCP binding: 0.004347	enzyme binding: 0.005845	ATP-dependent helicase activity: 0.006813	pre-mRNA binding: 0.01056	ubiquitin-ubiquitin ligase activity: 0.01199	U6 snRNA binding: 0.01293	RNA helicase activity: 0.01341	C2H2 zinc finger domain binding: 0.01905	ribonucleoprotein complex binding: 0.02831	transcription coactivator activity: 0.03758	estrogen receptor binding: 0.03785	calcium-dependent protein binding: 0.06238	chromatin binding: 0.07986	transcription cofactor activity: 0.08401	helicase activity: 0.09639
58	20	Q15428, Q12874, Q07955, Q8WWY3, O75533, Q15459, O43395, Q6P2Q9, P26368, P62316, O43290, P09661, Q01081, O75643, Q9UMS4, P17844, Q99459, P52272, P62314, O94906,	0	0	0	0	(E.F.G)_complex::12S_U11_snRNP::6S_methyltransferase_and_RG-containing_Sm_proteins_complex::20S_methylosome-SmD_complex::20S_methylosome_and_RG-containing_Sm_protein_complex::6S_methyltransferase_complex::JBP1-pICln_complex::SMN_complex,_U7_snRNA_specific::20S_methyltransferase_complex::AR_coactivator_complex::17S_U2_snRNP::SF3A1-SF3A2-SF3A3_complex::SF3b_complex::Exon_junction_complex::SRm160/30…	0.0816	245	C complex spliceosome	0.1806	80	0.520325	RNA binding: 4.659e-10	protein binding: 3.484e-08	RS domain binding: 5.113e-05	ribonucleoprotein complex binding: 0.0003853	ATP-dependent RNA helicase activity: 0.0007334	WD40-repeat domain binding: 0.001453	nucleotide binding: 0.001924	U5 snRNA binding: 0.001936	androgen receptor binding: 0.00278	snRNP binding: 0.002902	ATP-dependent helicase activity: 0.006813	pre-mRNA binding: 0.01056	nucleic acid binding: 0.01192	ubiquitin-ubiquitin ligase activity: 0.01199	U6 snRNA binding: 0.01293	RNA helicase activity: 0.01341	C2H2 zinc finger domain binding: 0.01905	identical protein binding: 0.02835	transcription coactivator activity: 0.03758	estrogen receptor binding: 0.03785	enzyme binding: 0.04969	calcium-dependent protein binding: 0.06238	chromatin binding: 0.07986	transcription cofactor activity: 0.08401	helicase activity: 0.09639
75	20	Q00839, P26368, Q07955, Q01081, O75533, Q15459, P62314, Q6P2Q9, Q15427, P62316, O43290, P09661, P23246, O75643, Q9UMS4, Q15029, P17844, P52272, Q99459, O94906,	0	0	0	0	(E.F.G)_complex::12S_U11_snRNP::6S_methyltransferase_and_RG-containing_Sm_proteins_complex::20S_methylosome-SmD_complex::20S_methylosome_and_RG-containing_Sm_protein_complex::6S_methyltransferase_complex::JBP1-pICln_complex::SMN_complex,_U7_snRNA_specific::20S_methyltransferase_complex::AR_coactivator_complex::17S_U2_snRNP::SF3A1-SF3A2-SF3A3_complex::SF3b_complex::Exon_junction_complex::SRm160/30…	0.0816	245	C complex spliceosome	0.1806	80	0.436508	RNA binding: 5.797e-13	protein binding: 3.484e-08	nucleotide binding: 1.284e-05	RS domain binding: 5.113e-05	ATP-dependent RNA helicase activity: 0.0007334	WD40-repeat domain binding: 0.001453	U5 snRNA binding: 0.001936	androgen receptor binding: 0.00278	ATP-dependent helicase activity: 0.006813	pre-mRNA binding: 0.01056	ubiquitin-ubiquitin ligase activity: 0.01199	U6 snRNA binding: 0.01293	RNA helicase activity: 0.01341	C2H2 zinc finger domain binding: 0.01905	ribonucleoprotein complex binding: 0.02831	transcription coactivator activity: 0.03758	estrogen receptor binding: 0.03785	nucleic acid binding: 0.0454	enzyme binding: 0.04969	calcium-dependent protein binding: 0.06238	chromatin binding: 0.07986	transcription cofactor activity: 0.08401	helicase activity: 0.09639
88	20	Q00839, P26368, Q07955, Q13435, P62318, Q01081, O75533, Q15459, P62314, Q6P2Q9, P62316, O43290, P09661, O75643, Q9UMS4, Q15029, P17844, P52272, Q99459, O94906,	0	0	0	0	(E.F.G)_complex::12S_U11_snRNP::6S_methyltransferase_and_RG-containing_Sm_proteins_complex::20S_methylosome-SmD_complex::20S_methylosome_and_RG-containing_Sm_protein_complex::6S_methyltransferase_complex::JBP1-pICln_complex::SMN_complex,_U7_snRNA_specific::20S_methyltransferase_complex::AR_coactivator_complex::17S_U2_snRNP::SF3A1-SF3A2-SF3A3_complex::SF3b_complex::Exon_junction_complex::SRm160/30…	0.0816	245	C complex spliceosome	0.2256	80	0.408	RNA binding: 4.659e-10	protein binding: 3.484e-08	RS domain binding: 5.113e-05	ATP-dependent RNA helicase activity: 0.0007334	WD40-repeat domain binding: 0.001453	nucleotide binding: 0.001924	U5 snRNA binding: 0.001936	androgen receptor binding: 0.00278	histone pre-mRNA DCP binding: 0.004347	enzyme binding: 0.005845	ATP-dependent helicase activity: 0.006813	pre-mRNA binding: 0.01056	ubiquitin-ubiquitin ligase activity: 0.01199	U6 snRNA binding: 0.01293	RNA helicase activity: 0.01341	C2H2 zinc finger domain binding: 0.01905	ribonucleoprotein complex binding: 0.02831	transcription coactivator activity: 0.03758	estrogen receptor binding: 0.03785	nucleic acid binding: 0.0454	calcium-dependent protein binding: 0.06238	chromatin binding: 0.07986	transcription cofactor activity: 0.08401	helicase activity: 0.09639
96	20	Q6P2Q9, Q12874, O43395, Q07955, O75533, Q15459, P62314, Q01081, P26368, P62316, O43290, P09661, O75643, Q9UMS4, P09012, P17844, P52272, Q99459, O94906, Q00839,	0	0	0	0	(E.F.G)_complex::12S_U11_snRNP::6S_methyltransferase_and_RG-containing_Sm_proteins_complex::20S_methylosome-SmD_complex::20S_methylosome_and_RG-containing_Sm_protein_complex::6S_methyltransferase_complex::JBP1-pICln_complex::SMN_complex,_U7_snRNA_specific::20S_methyltransferase_complex::AR_coactivator_complex::17S_U2_snRNP::SF3A1-SF3A2-SF3A3_complex::SF3b_complex::Exon_junction_complex::SRm160/30…	0.0816	245	C complex spliceosome	0.1806	80	0.475806	RNA binding: 1.815e-11	protein binding: 3.484e-08	RS domain binding: 5.113e-05	nucleotide binding: 0.0001779	ATP-dependent RNA helicase activity: 0.0007334	WD40-repeat domain binding: 0.001453	U5 snRNA binding: 0.001936	androgen receptor binding: 0.00278	ATP-dependent helicase activity: 0.006813	snRNA binding: 0.01009	pre-mRNA binding: 0.01056	ubiquitin-ubiquitin ligase activity: 0.01199	U6 snRNA binding: 0.01293	RNA helicase activity: 0.01341	C2H2 zinc finger domain binding: 0.01905	ribonucleoprotein complex binding: 0.02831	identical protein binding: 0.02835	transcription coactivator activity: 0.03758	estrogen receptor binding: 0.03785	nucleic acid binding: 0.0454	enzyme binding: 0.04969	calcium-dependent protein binding: 0.06238	chromatin binding: 0.07986	transcription cofactor activity: 0.08401	helicase activity: 0.09639
98	20	Q00839, Q6P2Q9, Q15029, Q07955, O75533, Q15459, P62314, Q01081, O43390, P26368, P62316, O75934, P09661, O75643, Q9UMS4, P23246, P17844, O43290, P52272, Q99459,	0	0	0	0	(E.F.G)_complex::12S_U11_snRNP::6S_methyltransferase_and_RG-containing_Sm_proteins_complex::20S_methylosome-SmD_complex::20S_methylosome_and_RG-containing_Sm_protein_complex::6S_methyltransferase_complex::JBP1-pICln_complex::SMN_complex,_U7_snRNA_specific::20S_methyltransferase_complex::AR_coactivator_complex::17S_U2_snRNP::SF3A1-SF3A2-SF3A3_complex::SF3b_complex::Exon_junction_complex::SRm160/30…	0.0816	245	C complex spliceosome	0.1806	80	0.476562	RNA binding: 1.815e-11	protein binding: 3.484e-08	nucleotide binding: 1.284e-05	RS domain binding: 5.113e-05	ATP-dependent RNA helicase activity: 0.0007334	WD40-repeat domain binding: 0.001453	U5 snRNA binding: 0.001936	ATP-dependent helicase activity: 0.006813	pre-mRNA binding: 0.01056	ubiquitin-ubiquitin ligase activity: 0.01199	U6 snRNA binding: 0.01293	RNA helicase activity: 0.01341	C2H2 zinc finger domain binding: 0.01905	estrogen receptor binding: 0.03785	nucleic acid binding: 0.0454	enzyme binding: 0.04969	calcium-dependent protein binding: 0.06238	androgen receptor binding: 0.07374	chromatin binding: 0.07986	transcription cofactor activity: 0.08401	helicase activity: 0.09639
132	20	Q00839, P26368, Q15029, Q07955, O75533, Q15459, P62314, Q9UMS4, O43390, Q6P2Q9, P62316, O43290, P09661, Q01081, O75643, Q92841, P23246, P17844, P52272, Q99459,	0	0	0	0	(E.F.G)_complex::12S_U11_snRNP::6S_methyltransferase_and_RG-containing_Sm_proteins_complex::20S_methylosome-SmD_complex::20S_methylosome_and_RG-containing_Sm_protein_complex::6S_methyltransferase_complex::JBP1-pICln_complex::SMN_complex,_U7_snRNA_specific::20S_methyltransferase_complex::AR_coactivator_complex::17S_U2_snRNP::SF3A1-SF3A2-SF3A3_complex::SF3b_complex::Exon_junction_complex::SRm160/30…	0.0816	245	C complex spliceosome	0.1806	80	0.468254	RNA binding: 5.797e-13	protein binding: 3.484e-08	nucleotide binding: 1.284e-05	RS domain binding: 5.113e-05	RNA helicase activity: 8.345e-05	ATP-dependent helicase activity: 0.0002594	estrogen receptor binding: 0.0006989	ATP-dependent RNA helicase activity: 0.0007334	WD40-repeat domain binding: 0.001453	U5 snRNA binding: 0.001936	pre-mRNA binding: 0.01056	RNA-dependent ATPase activity: 0.01104	nucleic acid binding: 0.01192	ubiquitin-ubiquitin ligase activity: 0.01199	U6 snRNA binding: 0.01293	C2H2 zinc finger domain binding: 0.01905	transcription coactivator activity: 0.03758	enzyme binding: 0.04969	calcium-dependent protein binding: 0.06238	androgen receptor binding: 0.07374	chromatin binding: 0.07986	transcription cofactor activity: 0.08401	helicase activity: 0.09639
138	20	O43172, Q00839, Q6P2Q9, Q07955, Q01081, P62316, Q15459, P62314, O43395, P26368, O75533, O43290, P09661, O75643, Q9UMS4, Q15029, P17844, P52272, Q99459, O94906,	0	0	0	0	(E.F.G)_complex::12S_U11_snRNP::6S_methyltransferase_and_RG-containing_Sm_proteins_complex::20S_methylosome-SmD_complex::20S_methylosome_and_RG-containing_Sm_protein_complex::6S_methyltransferase_complex::JBP1-pICln_complex::SMN_complex,_U7_snRNA_specific::20S_methyltransferase_complex::AR_coactivator_complex::17S_U2_snRNP::SF3A1-SF3A2-SF3A3_complex::SF3b_complex::Exon_junction_complex::SRm160/30…	0.0816	245	C complex spliceosome	0.1806	80	0.452381	RNA binding: 4.659e-10	protein binding: 3.484e-08	RS domain binding: 5.113e-05	ATP-dependent RNA helicase activity: 0.0007334	WD40-repeat domain binding: 0.001453	nucleotide binding: 0.001924	U5 snRNA binding: 0.001936	androgen receptor binding: 0.00278	ATP-dependent helicase activity: 0.006813	pre-mRNA binding: 0.01056	ubiquitin-ubiquitin ligase activity: 0.01199	U6 snRNA binding: 0.01293	RNA helicase activity: 0.01341	C2H2 zinc finger domain binding: 0.01905	ribonucleoprotein complex binding: 0.02831	identical protein binding: 0.02835	transcription coactivator activity: 0.03758	estrogen receptor binding: 0.03785	enzyme binding: 0.04969	calcium-dependent protein binding: 0.06238	chromatin binding: 0.07986	transcription cofactor activity: 0.08401	helicase activity: 0.09639
149	20	Q00839, P26368, Q07955, P62318, Q01081, P62316, Q15459, P62314, Q6P2Q9, O75533, O43290, P14678, O75643, Q9UMS4, P09661, P17844, P52272, Q99459, O94906, Q15029,	0	0	0	0	(E.F.G)_complex::12S_U11_snRNP::6S_methyltransferase_and_RG-containing_Sm_proteins_complex::20S_methylosome-SmD_complex::20S_methylosome_and_RG-containing_Sm_protein_complex::6S_methyltransferase_complex::JBP1-pICln_complex::SMN_complex,_U7_snRNA_specific::20S_methyltransferase_complex::AR_coactivator_complex::17S_U2_snRNP::SF3A1-SF3A2-SF3A3_complex::SF3b_complex::Exon_junction_complex::SRm160/30…	0.0816	245	C complex spliceosome	0.2256	80	0.392	RNA binding: 4.659e-10	protein binding: 3.484e-08	histone pre-mRNA DCP binding: 8.013e-06	RS domain binding: 5.113e-05	ATP-dependent RNA helicase activity: 0.0007334	WD40-repeat domain binding: 0.001453	nucleotide binding: 0.001924	U5 snRNA binding: 0.001936	androgen receptor binding: 0.00278	enzyme binding: 0.005845	ATP-dependent helicase activity: 0.006813	pre-mRNA binding: 0.01056	ubiquitin-ubiquitin ligase activity: 0.01199	U6 snRNA binding: 0.01293	RNA helicase activity: 0.01341	C2H2 zinc finger domain binding: 0.01905	ribonucleoprotein complex binding: 0.02831	transcription coactivator activity: 0.03758	estrogen receptor binding: 0.03785	calcium-dependent protein binding: 0.06238	chromatin binding: 0.07986	transcription cofactor activity: 0.08401	helicase activity: 0.09639
159	20	O75400, Q15029, Q99459, Q07955, O75533, Q15459, P62314, P61978, O43390, Q6P2Q9, P62316, P26368, P09661, Q01081, O75643, P23246, P17844, O43290, P52272, Q9UMS4,	0	0	0	0	(E.F.G)_complex::12S_U11_snRNP::6S_methyltransferase_and_RG-containing_Sm_proteins_complex::20S_methylosome-SmD_complex::20S_methylosome_and_RG-containing_Sm_protein_complex::6S_methyltransferase_complex::JBP1-pICln_complex::SMN_complex,_U7_snRNA_specific::20S_methyltransferase_complex::AR_coactivator_complex::17S_U2_snRNP::SF3A1-SF3A2-SF3A3_complex::SF3b_complex::Exon_junction_complex::SRm160/30…	0.0816	245	C complex spliceosome	0.1806	80	0.504065	RNA binding: 1.815e-11	protein binding: 3.484e-08	nucleotide binding: 1.284e-05	RS domain binding: 5.113e-05	ATP-dependent RNA helicase activity: 0.0007334	WD40-repeat domain binding: 0.001453	U5 snRNA binding: 0.001936	ATP-dependent helicase activity: 0.006813	pre-mRNA binding: 0.01056	ubiquitin-ubiquitin ligase activity: 0.01199	U6 snRNA binding: 0.01293	RNA helicase activity: 0.01341	C2H2 zinc finger domain binding: 0.01905	proline-rich region binding: 0.02877	estrogen receptor binding: 0.03785	nucleic acid binding: 0.0454	enzyme binding: 0.04969	RNA polymerase II core promoter proximal region sequence-specific DNA binding: 0.05981	calcium-dependent protein binding: 0.06238	androgen receptor binding: 0.07374	chromatin binding: 0.07986	transcription cofactor activity: 0.08401	helicase activity: 0.09639	single-stranded DNA binding: 0.09718
182	20	Q00839, P26368, Q15029, O60506, Q07955, O75533, Q15459, P62314, Q01081, Q6P2Q9, P62316, O43290, P09661, O75643, Q9UMS4, P17844, Q99459, P52272, P78527, O94906,	0	0	0	0	(E.F.G)_complex::12S_U11_snRNP::6S_methyltransferase_and_RG-containing_Sm_proteins_complex::20S_methylosome-SmD_complex::20S_methylosome_and_RG-containing_Sm_protein_complex::6S_methyltransferase_complex::JBP1-pICln_complex::SMN_complex,_U7_snRNA_specific::20S_methyltransferase_complex::AR_coactivator_complex::17S_U2_snRNP::SF3A1-SF3A2-SF3A3_complex::SF3b_complex::Exon_junction_complex::SRm160/30…	0.0816	245	C complex spliceosome	0.2025	80	0.434426	RNA binding: 1.815e-11	protein binding: 3.484e-08	RS domain binding: 5.113e-05	nucleotide binding: 0.0001779	ATP-dependent RNA helicase activity: 0.0007334	WD40-repeat domain binding: 0.001453	U5 snRNA binding: 0.001936	androgen receptor binding: 0.00278	enzyme binding: 0.005845	ATP-dependent helicase activity: 0.006813	DNA-dependent protein kinase activity: 0.007225	pre-mRNA binding: 0.01056	ubiquitin-ubiquitin ligase activity: 0.01199	U6 snRNA binding: 0.01293	RNA helicase activity: 0.01341	C2H2 zinc finger domain binding: 0.01905	poly(A) RNA binding: 0.02416	ribonucleoprotein complex binding: 0.02831	transcription coactivator activity: 0.03758	estrogen receptor binding: 0.03785	calcium-dependent protein binding: 0.06238	phosphotransferase activity alcohol group as acceptor: 0.06238	chromatin binding: 0.07986	transcription cofactor activity: 0.08401	helicase activity: 0.09639
183	20	O95400, P26368, Q07955, O43395, Q01081, P62316, O94906, P62314, Q6P2Q9, Q13243, O75533, O43290, P09661, O75643, Q9UMS4, Q15459, P52272, Q99459, Q15029, Q00839,	0	0	0	0	(E.F.G)_complex::12S_U11_snRNP::6S_methyltransferase_and_RG-containing_Sm_proteins_complex::20S_methylosome-SmD_complex::20S_methylosome_and_RG-containing_Sm_protein_complex::6S_methyltransferase_complex::JBP1-pICln_complex::SMN_complex,_U7_snRNA_specific::20S_methyltransferase_complex::AR_coactivator_complex::17S_U2_snRNP::SF3A1-SF3A2-SF3A3_complex::SF3b_complex::Exon_junction_complex::SRm160/30…	0.0816	245	C complex spliceosome	0.16	80	0.488	RNA binding: 1.815e-11	protein binding: 3.484e-08	RS domain binding: 1.489e-07	nucleotide binding: 0.0001779	ribonucleoprotein complex binding: 0.0003853	WD40-repeat domain binding: 0.001453	U5 snRNA binding: 0.001936	ubiquitin-ubiquitin ligase activity: 0.01199	U6 snRNA binding: 0.01293	C2H2 zinc finger domain binding: 0.01905	identical protein binding: 0.02835	ATP-dependent RNA helicase activity: 0.03874	androgen receptor binding: 0.07374	chromatin binding: 0.07986	helicase activity: 0.09639
214	20	Q6P2Q9, O43395, Q07955, P62316, Q15459, P62314, Q01081, Q13243, Q13573, P26368, O43143, O43290, P09661, O75643, Q9UMS4, O75533, P17844, P52272, Q99459, O94906,	0	0	0	0	(E.F.G)_complex::12S_U11_snRNP::6S_methyltransferase_and_RG-containing_Sm_proteins_complex::20S_methylosome-SmD_complex::20S_methylosome_and_RG-containing_Sm_protein_complex::6S_methyltransferase_complex::JBP1-pICln_complex::SMN_complex,_U7_snRNA_specific::20S_methyltransferase_complex::AR_coactivator_complex::17S_U2_snRNP::SF3A1-SF3A2-SF3A3_complex::SF3b_complex::Exon_junction_complex::SRm160/30…	0.0816	245	C complex spliceosome	0.16	80	0.459016	RNA binding: 4.659e-10	protein binding: 3.484e-08	RS domain binding: 1.489e-07	RNA helicase activity: 8.345e-05	nucleotide binding: 0.0001779	ATP-dependent helicase activity: 0.0002594	ATP-dependent RNA helicase activity: 0.0007334	WD40-repeat domain binding: 0.001453	U5 snRNA binding: 0.001936	androgen receptor binding: 0.00278	transcription coactivator activity: 0.00373	pre-mRNA binding: 0.01056	nucleic acid binding: 0.01192	ubiquitin-ubiquitin ligase activity: 0.01199	Notch binding: 0.01293	U6 snRNA binding: 0.01293	nuclear hormone receptor binding: 0.0167	vitamin D receptor binding: 0.01764	C2H2 zinc finger domain binding: 0.01905	retinoic acid receptor binding: 0.02555	ribonucleoprotein complex binding: 0.02831	identical protein binding: 0.02835	estrogen receptor binding: 0.03785	enzyme binding: 0.04969	SMAD binding: 0.0555	calcium-dependent protein binding: 0.06238	chromatin binding: 0.07986	transcription cofactor activity: 0.08401	helicase activity: 0.09639
230	20	Q9HCS7, P26368, Q15029, Q07955, O75533, Q15459, P62314, Q01081, Q6P2Q9, P62316, O43290, P09661, O75643, Q9UMS4, P23246, P17844, P52272, Q99459, O94906, Q00839,	0	0	0	0	(E.F.G)_complex::12S_U11_snRNP::6S_methyltransferase_and_RG-containing_Sm_proteins_complex::20S_methylosome-SmD_complex::20S_methylosome_and_RG-containing_Sm_protein_complex::6S_methyltransferase_complex::JBP1-pICln_complex::SMN_complex,_U7_snRNA_specific::20S_methyltransferase_complex::AR_coactivator_complex::17S_U2_snRNP::SF3A1-SF3A2-SF3A3_complex::SF3b_complex::Exon_junction_complex::SRm160/30…	0.0816	245	C complex spliceosome	0.2025	80	0.44	RNA binding: 1.815e-11	protein binding: 3.484e-08	RS domain binding: 5.113e-05	nucleotide binding: 0.0001779	ATP-dependent RNA helicase activity: 0.0007334	WD40-repeat domain binding: 0.001453	U5 snRNA binding: 0.001936	androgen receptor binding: 0.00278	ATP-dependent helicase activity: 0.006813	pre-mRNA binding: 0.01056	ubiquitin-ubiquitin ligase activity: 0.01199	U6 snRNA binding: 0.01293	RNA helicase activity: 0.01341	C2H2 zinc finger domain binding: 0.01905	ribonucleoprotein complex binding: 0.02831	transcription coactivator activity: 0.03758	estrogen receptor binding: 0.03785	enzyme binding: 0.04969	calcium-dependent protein binding: 0.06238	chromatin binding: 0.07986	transcription cofactor activity: 0.08401	helicase activity: 0.09639
240	20	Q00839, P26368, Q15029, Q07955, O75533, Q9NR30, P62314, P61978, O43390, Q6P2Q9, P62316, O43290, P09661, Q01081, O75643, P23246, Q15459, Q99459, P52272, Q9UMS4,	0	0	0	0	(E.F.G)_complex::12S_U11_snRNP::6S_methyltransferase_and_RG-containing_Sm_proteins_complex::20S_methylosome-SmD_complex::20S_methylosome_and_RG-containing_Sm_protein_complex::6S_methyltransferase_complex::JBP1-pICln_complex::SMN_complex,_U7_snRNA_specific::20S_methyltransferase_complex::AR_coactivator_complex::17S_U2_snRNP::SF3A1-SF3A2-SF3A3_complex::SF3b_complex::Exon_junction_complex::SRm160/30…	0.0816	245	C complex spliceosome	0.1806	80	0.504065	RNA binding: 5.797e-13	protein binding: 9.481e-07	nucleotide binding: 1.284e-05	RS domain binding: 5.113e-05	ATP-dependent RNA helicase activity: 0.0007334	WD40-repeat domain binding: 0.001453	U5 snRNA binding: 0.001936	ubiquitin-ubiquitin ligase activity: 0.01199	U6 snRNA binding: 0.01293	C2H2 zinc finger domain binding: 0.01905	double-stranded RNA binding: 0.04587	RNA polymerase II core promoter proximal region sequence-specific DNA binding: 0.05981	chromatin binding: 0.07986	helicase activity: 0.09639	single-stranded DNA binding: 0.09718
267	20	O43395, O15116, P62318, Q01081, P62316, Q15459, P62314, Q6P2Q9, Q13243, P26368, O75533, O43290, P09661, O75643, Q9UMS4, P23246, P17844, P52272, Q99459, O94906,	0.25	0	1	249	(E.F.G)_complex::12S_U11_snRNP::6S_methyltransferase_and_RG-containing_Sm_proteins_complex::20S_methylosome-SmD_complex::20S_methylosome_and_RG-containing_Sm_protein_complex::6S_methyltransferase_complex::JBP1-pICln_complex::SMN_complex,_U7_snRNA_specific::20S_methyltransferase_complex::AR_coactivator_complex::17S_U2_snRNP::SF3A1-SF3A2-SF3A3_complex::SF3b_complex::Exon_junction_complex::SRm160/30…	0.0816	245	C complex spliceosome	0.1406	80	0.439024	RNA binding: 1.815e-11	protein binding: 3.484e-08	RS domain binding: 5.113e-05	nucleotide binding: 0.0001779	ATP-dependent RNA helicase activity: 0.0007334	WD40-repeat domain binding: 0.001453	U5 snRNA binding: 0.001936	androgen receptor binding: 0.00278	histone pre-mRNA DCP binding: 0.004347	enzyme binding: 0.005845	ATP-dependent helicase activity: 0.006813	pre-mRNA binding: 0.01056	ubiquitin-ubiquitin ligase activity: 0.01199	U6 snRNA binding: 0.01293	RNA helicase activity: 0.01341	C2H2 zinc finger domain binding: 0.01905	ribonucleoprotein complex binding: 0.02831	identical protein binding: 0.02835	transcription coactivator activity: 0.03758	estrogen receptor binding: 0.03785	calcium-dependent protein binding: 0.06238	chromatin binding: 0.07986	transcription cofactor activity: 0.08401	helicase activity: 0.09639
1650	20	Q00839, Q9Y3B4, P26368, Q07955, Q01081, P62316, Q15459, P62314, Q6P2Q9, O75533, O43290, P09661, P23246, O75643, Q9UMS4, Q15029, P17844, P52272, Q99459, O94906,	0	0	0	0	(E.F.G)_complex::12S_U11_snRNP::6S_methyltransferase_and_RG-containing_Sm_proteins_complex::20S_methylosome-SmD_complex::20S_methylosome_and_RG-containing_Sm_protein_complex::6S_methyltransferase_complex::JBP1-pICln_complex::SMN_complex,_U7_snRNA_specific::20S_methyltransferase_complex::AR_coactivator_complex::17S_U2_snRNP::SF3A1-SF3A2-SF3A3_complex::SF3b_complex::Exon_junction_complex::SRm160/30…	0.0816	245	C complex spliceosome	0.1806	80	0.407692	RNA binding: 5.797e-13	protein binding: 9.481e-07	nucleotide binding: 1.284e-05	RS domain binding: 5.113e-05	ATP-dependent RNA helicase activity: 0.0007334	WD40-repeat domain binding: 0.001453	U5 snRNA binding: 0.001936	androgen receptor binding: 0.00278	ATP-dependent helicase activity: 0.006813	pre-mRNA binding: 0.01056	ubiquitin-ubiquitin ligase activity: 0.01199	U6 snRNA binding: 0.01293	RNA helicase activity: 0.01341	C2H2 zinc finger domain binding: 0.01905	ribonucleoprotein complex binding: 0.02831	transcription coactivator activity: 0.03758	estrogen receptor binding: 0.03785	enzyme binding: 0.04969	calcium-dependent protein binding: 0.06238	chromatin binding: 0.07986	transcription cofactor activity: 0.08401	helicase activity: 0.09639
1670	20	P26368, Q07955, O43395, Q01081, O75533, Q15459, P62314, P49756, Q13243, Q6P2Q9, P62316, O43290, P09661, O75643, Q9UMS4, P23246, P17844, P52272, Q99459, O94906,	0	0	0	0	(E.F.G)_complex::12S_U11_snRNP::6S_methyltransferase_and_RG-containing_Sm_proteins_complex::20S_methylosome-SmD_complex::20S_methylosome_and_RG-containing_Sm_protein_complex::6S_methyltransferase_complex::JBP1-pICln_complex::SMN_complex,_U7_snRNA_specific::20S_methyltransferase_complex::AR_coactivator_complex::17S_U2_snRNP::SF3A1-SF3A2-SF3A3_complex::SF3b_complex::Exon_junction_complex::SRm160/30…	0.0816	245	C complex spliceosome	0.1406	80	0.456693	RNA binding: 1.815e-11	protein binding: 3.484e-08	RS domain binding: 1.489e-07	nucleotide binding: 7.405e-07	ATP-dependent RNA helicase activity: 0.0007334	WD40-repeat domain binding: 0.001453	U5 snRNA binding: 0.001936	androgen receptor binding: 0.00278	ATP-dependent helicase activity: 0.006813	pre-mRNA binding: 0.01056	nucleic acid binding: 0.01192	ubiquitin-ubiquitin ligase activity: 0.01199	U6 snRNA binding: 0.01293	RNA helicase activity: 0.01341	C2H2 zinc finger domain binding: 0.01905	ribonucleoprotein complex binding: 0.02831	identical protein binding: 0.02835	transcription coactivator activity: 0.03758	estrogen receptor binding: 0.03785	enzyme binding: 0.04969	calcium-dependent protein binding: 0.06238	chromatin binding: 0.07986	transcription cofactor activity: 0.08401	helicase activity: 0.09639
67	21	O43395, Q07955, Q01081, P62316, P18583, P62314, Q6P2Q9, Q13243, O43390, P26368, O75533, O43290, P09661, P23246, O75643, Q9UMS4, Q15459, P52272, Q99459, O94906, Q15029,	0	0	0	0	(E.F.G)_complex::12S_U11_snRNP::6S_methyltransferase_and_RG-containing_Sm_proteins_complex::20S_methylosome-SmD_complex::20S_methylosome_and_RG-containing_Sm_protein_complex::6S_methyltransferase_complex::JBP1-pICln_complex::SMN_complex,_U7_snRNA_specific::20S_methyltransferase_complex::AR_coactivator_complex::17S_U2_snRNP::SF3A1-SF3A2-SF3A3_complex::SF3b_complex::Exon_junction_complex::SRm160/30…	0.0777	245	C complex spliceosome	0.1524	80	0.51049	RNA binding: 4.289e-14	RS domain binding: 3.601e-10	protein binding: 1.476e-08	nucleotide binding: 1.08e-06	WD40-repeat domain binding: 0.001526	U5 snRNA binding: 0.002033	ubiquitin-ubiquitin ligase activity: 0.01258	U6 snRNA binding: 0.01357	nucleic acid binding: 0.01446	C2H2 zinc finger domain binding: 0.01998	ribonucleoprotein complex binding: 0.02968	identical protein binding: 0.03189	ATP-dependent RNA helicase activity: 0.0406	androgen receptor binding: 0.07712	chromatin binding: 0.08597
475	21	Q6P2Q9, P26368, Q15029, Q07955, O75533, Q15459, P62314, P61978, Q13243, O43390, Q99459, Q00839, O43290, P09661, Q01081, O75643, P23246, P17844, P52272, Q9UMS4, P43307,	0	0	0	0	(E.F.G)_complex::12S_U11_snRNP::6S_methyltransferase_and_RG-containing_Sm_proteins_complex::20S_methylosome-SmD_complex::20S_methylosome_and_RG-containing_Sm_protein_complex::6S_methyltransferase_complex::JBP1-pICln_complex::SMN_complex,_U7_snRNA_specific::20S_methyltransferase_complex::AR_coactivator_complex::17S_U2_snRNP::SF3A1-SF3A2-SF3A3_complex::SF3b_complex::Exon_junction_complex::SRm160/30…	0.0777	245	C complex spliceosome	0.172	80	0.503817	RNA binding: 4.289e-14	protein binding: 1.476e-08	RS domain binding: 1.736e-07	nucleotide binding: 1.08e-06	ATP-dependent RNA helicase activity: 0.000809	WD40-repeat domain binding: 0.001526	U5 snRNA binding: 0.002033	ATP-dependent helicase activity: 0.007482	pre-mRNA binding: 0.01109	ubiquitin-ubiquitin ligase activity: 0.01258	U6 snRNA binding: 0.01357	RNA helicase activity: 0.01407	nucleic acid binding: 0.01446	C2H2 zinc finger domain binding: 0.01998	estrogen receptor binding: 0.03966	enzyme binding: 0.05386	RNA polymerase II core promoter proximal region sequence-specific DNA binding: 0.0626	calcium-dependent protein binding: 0.06528	androgen receptor binding: 0.07712	chromatin binding: 0.08597	transcription cofactor activity: 0.08781
1668	21	P61978, Q15029, Q01081, Q07955, O75533, Q15459, P62314, O75400, P04004, Q6P2Q9, P62316, P26368, P09661, O43390, O75643, Q9UMS4, P23246, P17844, O43290, P52272, Q99459,	0	0	0	0	(E.F.G)_complex::12S_U11_snRNP::6S_methyltransferase_and_RG-containing_Sm_proteins_complex::20S_methylosome-SmD_complex::20S_methylosome_and_RG-containing_Sm_protein_complex::6S_methyltransferase_complex::JBP1-pICln_complex::SMN_complex,_U7_snRNA_specific::20S_methyltransferase_complex::AR_coactivator_complex::17S_U2_snRNP::SF3A1-SF3A2-SF3A3_complex::SF3b_complex::Exon_junction_complex::SRm160/30…	0.0777	245	C complex spliceosome	0.172	80	0.496241	RNA binding: 4.025e-11	protein binding: 1.476e-08	nucleotide binding: 1.747e-05	RS domain binding: 5.648e-05	ATP-dependent RNA helicase activity: 0.000809	WD40-repeat domain binding: 0.001526	U5 snRNA binding: 0.002033	ATP-dependent helicase activity: 0.007482	pre-mRNA binding: 0.01109	ubiquitin-ubiquitin ligase activity: 0.01258	U6 snRNA binding: 0.01357	RNA helicase activity: 0.01407	polysaccharide binding: 0.01456	C2H2 zinc finger domain binding: 0.01998	extracellular matrix binding: 0.03016	proline-rich region binding: 0.03016	estrogen receptor binding: 0.03966	nucleic acid binding: 0.05184	enzyme binding: 0.05386	RNA polymerase II core promoter proximal region sequence-specific DNA binding: 0.0626	calcium-dependent protein binding: 0.06528	scavenger receptor activity: 0.06528	androgen receptor binding: 0.07712	chromatin binding: 0.08597	transcription cofactor activity: 0.08781
1682	21	Q6P2Q9, P26368, Q15029, O43395, Q01081, O75533, P23246, P62314, Q07955, Q13243, O43390, Q9Y5J7, P62316, O43290, P09661, Q15459, P17844, Q99459, P52272, Q9UMS4, O94906,	0	0	0	0	(E.F.G)_complex::12S_U11_snRNP::6S_methyltransferase_and_RG-containing_Sm_proteins_complex::20S_methylosome-SmD_complex::20S_methylosome_and_RG-containing_Sm_protein_complex::6S_methyltransferase_complex::JBP1-pICln_complex::SMN_complex,_U7_snRNA_specific::20S_methyltransferase_complex::AR_coactivator_complex::17S_U2_snRNP::SF3A1-SF3A2-SF3A3_complex::SF3b_complex::Exon_junction_complex::SRm160/30…	0.0777	245	C complex spliceosome	0.1524	80	0.529851	RNA binding: 1.447e-12	protein binding: 1.476e-08	RS domain binding: 1.736e-07	nucleotide binding: 1.08e-06	WD40-repeat domain binding: 0.001526	U5 snRNA binding: 0.002033	androgen receptor binding: 0.003061	pre-mRNA binding: 0.01109	ubiquitin-ubiquitin ligase activity: 0.01258	U6 snRNA binding: 0.01357	RNA helicase activity: 0.01407	C2H2 zinc finger domain binding: 0.01998	ribonucleoprotein complex binding: 0.02968	estrogen receptor binding: 0.03966	ATP-dependent RNA helicase activity: 0.0406	transcription coactivator activity: 0.04086	nucleic acid binding: 0.05184	enzyme binding: 0.05386	chaperone binding: 0.0635	calcium-dependent protein binding: 0.06528	chromatin binding: 0.08597	transcription cofactor activity: 0.08781
449	19	Q00839, P26368, Q07955, Q9BZJ0, O43395, Q01081, P62316, Q15459, P62314, Q6P2Q9, O75533, O43290, P09661, O75643, Q9UMS4, Q15029, P52272, Q99459, O94906,	0	0	0	0	(E.F.G)_complex::12S_U11_snRNP::6S_methyltransferase_and_RG-containing_Sm_proteins_complex::20S_methylosome-SmD_complex::20S_methylosome_and_RG-containing_Sm_protein_complex::6S_methyltransferase_complex::JBP1-pICln_complex::SMN_complex,_U7_snRNA_specific::20S_methyltransferase_complex::AR_coactivator_complex::17S_U2_snRNP::SF3A1-SF3A2-SF3A3_complex::SF3b_complex::Exon_junction_complex::SRm160/30…	0.0776	245	C complex spliceosome	0.1901	80	0.473684	RNA binding: 7.636e-12	protein binding: 8.224e-08	RS domain binding: 4.604e-05	WD40-repeat domain binding: 0.00138	nucleotide binding: 0.001583	U5 snRNA binding: 0.00184	ubiquitin-ubiquitin ligase activity: 0.01139	U6 snRNA binding: 0.01229	C2H2 zinc finger domain binding: 0.01811	identical protein binding: 0.02499	ribonucleoprotein complex binding: 0.02693	ATP-dependent RNA helicase activity: 0.03688	androgen receptor binding: 0.07033	chromatin binding: 0.07379	helicase activity: 0.09206
147	20	Q6P2Q9, O43395, Q07955, O75533, Q15459, P62314, Q9UMS4, Q13243, P26368, P62316, O43660, O43290, P09661, Q01081, O75643, Q96PK6, P17844, P52272, Q99459, O94906,	0	0	0	0	(E.F.G)_complex::12S_U11_snRNP::6S_methyltransferase_and_RG-containing_Sm_proteins_complex::20S_methylosome-SmD_complex::20S_methylosome_and_RG-containing_Sm_protein_complex::6S_methyltransferase_complex::JBP1-pICln_complex::SMN_complex,_U7_snRNA_specific::20S_methyltransferase_complex::AR_coactivator_complex::17S_U2_snRNP::SF3A1-SF3A2-SF3A3_complex::SF3b_complex::Exon_junction_complex::SRm160/30…	0.0737	245	C complex spliceosome	0.16	80	0.464	RNA binding: 1.815e-11	protein binding: 3.484e-08	RS domain binding: 1.489e-07	nucleotide binding: 1.284e-05	ATP-dependent RNA helicase activity: 0.0007334	WD40-repeat domain binding: 0.001453	U5 snRNA binding: 0.001936	androgen receptor binding: 0.00278	ATP-dependent helicase activity: 0.006813	pre-mRNA binding: 0.01056	nucleic acid binding: 0.01192	ubiquitin-ubiquitin ligase activity: 0.01199	U6 snRNA binding: 0.01293	RNA helicase activity: 0.01341	C2H2 zinc finger domain binding: 0.01905	ribonucleoprotein complex binding: 0.02831	identical protein binding: 0.02835	transcription coactivator activity: 0.03758	estrogen receptor binding: 0.03785	RNA polymerase II transcription cofactor activity: 0.0494	enzyme binding: 0.04969	ligand-dependent nuclear receptor transcription coactivator activity: 0.05333	calcium-dependent protein binding: 0.06238	protein binding bridging: 0.0662	chromatin binding: 0.07986	transcription cofactor activity: 0.08401	helicase activity: 0.09639
196	20	Q6P2Q9, Q15233, O43395, Q01081, O75533, P23246, P62314, Q07955, Q13243, P26368, P62316, O43290, P09661, P18583, Q15459, P17844, Q99459, P52272, Q9UMS4, O94906,	0	0	0	0	(E.F.G)_complex::12S_U11_snRNP::6S_methyltransferase_and_RG-containing_Sm_proteins_complex::20S_methylosome-SmD_complex::20S_methylosome_and_RG-containing_Sm_protein_complex::6S_methyltransferase_complex::JBP1-pICln_complex::SMN_complex,_U7_snRNA_specific::20S_methyltransferase_complex::AR_coactivator_complex::17S_U2_snRNP::SF3A1-SF3A2-SF3A3_complex::SF3b_complex::Exon_junction_complex::SRm160/30…	0.0737	245	C complex spliceosome	0.1225	80	0.475806	RNA binding: 1.504e-14	RS domain binding: 2.916e-10	protein binding: 3.484e-08	nucleotide binding: 7.405e-07	WD40-repeat domain binding: 0.001453	U5 snRNA binding: 0.001936	androgen receptor binding: 0.00278	pre-mRNA binding: 0.01056	nucleic acid binding: 0.01192	ubiquitin-ubiquitin ligase activity: 0.01199	U6 snRNA binding: 0.01293	RNA helicase activity: 0.01341	C2H2 zinc finger domain binding: 0.01905	ribonucleoprotein complex binding: 0.02831	identical protein binding: 0.02835	transcription coactivator activity: 0.03758	estrogen receptor binding: 0.03785	ATP-dependent RNA helicase activity: 0.03874	enzyme binding: 0.04969	DNA binding: 0.06211	calcium-dependent protein binding: 0.06238	chromatin binding: 0.07986	transcription cofactor activity: 0.08401
217	20	Q6P2Q9, P26368, O43395, Q01081, O75533, P23246, P62314, Q07955, Q13243, O43390, Q9Y5J7, P62316, O43290, P09661, Q15459, P17844, Q99459, P52272, Q9UMS4, O94906,	0	0	0	0	(E.F.G)_complex::12S_U11_snRNP::6S_methyltransferase_and_RG-containing_Sm_proteins_complex::20S_methylosome-SmD_complex::20S_methylosome_and_RG-containing_Sm_protein_complex::6S_methyltransferase_complex::JBP1-pICln_complex::SMN_complex,_U7_snRNA_specific::20S_methyltransferase_complex::AR_coactivator_complex::17S_U2_snRNP::SF3A1-SF3A2-SF3A3_complex::SF3b_complex::Exon_junction_complex::SRm160/30…	0.0737	245	C complex spliceosome	0.1406	80	0.540323	RNA binding: 5.797e-13	protein binding: 3.484e-08	RS domain binding: 1.489e-07	nucleotide binding: 7.405e-07	WD40-repeat domain binding: 0.001453	U5 snRNA binding: 0.001936	androgen receptor binding: 0.00278	pre-mRNA binding: 0.01056	ubiquitin-ubiquitin ligase activity: 0.01199	U6 snRNA binding: 0.01293	RNA helicase activity: 0.01341	C2H2 zinc finger domain binding: 0.01905	ribonucleoprotein complex binding: 0.02831	transcription coactivator activity: 0.03758	estrogen receptor binding: 0.03785	ATP-dependent RNA helicase activity: 0.03874	nucleic acid binding: 0.0454	enzyme binding: 0.04969	chaperone binding: 0.06067	calcium-dependent protein binding: 0.06238	chromatin binding: 0.07986	transcription cofactor activity: 0.08401
257	20	Q13243, Q6P2Q9, Q07955, Q01081, P62316, Q15459, P62314, O43395, Q86TB9, P26368, O75533, O43290, P09661, O75643, Q9UMS4, P23246, P17844, P52272, Q99459, O94906,	0.25	1	0	230	(E.F.G)_complex::12S_U11_snRNP::6S_methyltransferase_and_RG-containing_Sm_proteins_complex::20S_methylosome-SmD_complex::20S_methylosome_and_RG-containing_Sm_protein_complex::6S_methyltransferase_complex::JBP1-pICln_complex::SMN_complex,_U7_snRNA_specific::20S_methyltransferase_complex::AR_coactivator_complex::17S_U2_snRNP::SF3A1-SF3A2-SF3A3_complex::SF3b_complex::Exon_junction_complex::SRm160/30…	0.0737	245	C complex spliceosome	0.1406	80	0.47619	RNA binding: 5.797e-13	protein binding: 3.484e-08	RS domain binding: 1.489e-07	nucleotide binding: 1.284e-05	ATP-dependent RNA helicase activity: 0.0007334	WD40-repeat domain binding: 0.001453	U5 snRNA binding: 0.001936	androgen receptor binding: 0.00278	poly(G) RNA binding: 0.002902	ATP-dependent helicase activity: 0.006813	pre-mRNA binding: 0.01056	ubiquitin-ubiquitin ligase activity: 0.01199	U6 snRNA binding: 0.01293	RNA helicase activity: 0.01341	C2H2 zinc finger domain binding: 0.01905	poly(U) RNA binding: 0.02231	ribonucleoprotein complex binding: 0.02831	identical protein binding: 0.02835	transcription coactivator activity: 0.03758	estrogen receptor binding: 0.03785	nucleic acid binding: 0.0454	enzyme binding: 0.04969	calcium-dependent protein binding: 0.06238	chromatin binding: 0.07986	transcription cofactor activity: 0.08401	helicase activity: 0.09639
424	20	Q6P2Q9, O43395, Q07955, O75533, Q9ULR0, P62314, Q9UMS4, P26368, P62316, O43660, O43290, P09661, Q01081, O75643, Q96PK6, Q15459, P17844, P52272, Q99459, O94906,	0	0	0	0	(E.F.G)_complex::12S_U11_snRNP::6S_methyltransferase_and_RG-containing_Sm_proteins_complex::20S_methylosome-SmD_complex::20S_methylosome_and_RG-containing_Sm_protein_complex::6S_methyltransferase_complex::JBP1-pICln_complex::SMN_complex,_U7_snRNA_specific::20S_methyltransferase_complex::AR_coactivator_complex::17S_U2_snRNP::SF3A1-SF3A2-SF3A3_complex::SF3b_complex::Exon_junction_complex::SRm160/30…	0.0737	245	C complex spliceosome	0.1806	80	0.470085	RNA binding: 4.659e-10	protein binding: 3.484e-08	RS domain binding: 5.113e-05	nucleotide binding: 0.0001779	ATP-dependent RNA helicase activity: 0.0007334	WD40-repeat domain binding: 0.001453	U5 snRNA binding: 0.001936	androgen receptor binding: 0.00278	ATP-dependent helicase activity: 0.006813	pre-mRNA binding: 0.01056	ubiquitin-ubiquitin ligase activity: 0.01199	U6 snRNA binding: 0.01293	RNA helicase activity: 0.01341	C2H2 zinc finger domain binding: 0.01905	ribonucleoprotein complex binding: 0.02831	identical protein binding: 0.02835	transcription coactivator activity: 0.03758	estrogen receptor binding: 0.03785	nucleic acid binding: 0.0454	RNA polymerase II transcription cofactor activity: 0.0494	enzyme binding: 0.04969	ligand-dependent nuclear receptor transcription coactivator activity: 0.05333	calcium-dependent protein binding: 0.06238	protein binding bridging: 0.0662	chromatin binding: 0.07986	transcription cofactor activity: 0.08401	helicase activity: 0.09639
1657	20	Q6P2Q9, P26368, Q07955, P82933, O75533, Q15459, P62314, Q01081, Q13243, O43390, Q99459, O43290, P09661, O75643, P23246, P07910, P17844, P52272, Q9UMS4, Q15029,	0	0	0	0	(E.F.G)_complex::12S_U11_snRNP::6S_methyltransferase_and_RG-containing_Sm_proteins_complex::20S_methylosome-SmD_complex::20S_methylosome_and_RG-containing_Sm_protein_complex::6S_methyltransferase_complex::JBP1-pICln_complex::SMN_complex,_U7_snRNA_specific::20S_methyltransferase_complex::AR_coactivator_complex::17S_U2_snRNP::SF3A1-SF3A2-SF3A3_complex::SF3b_complex::Exon_junction_complex::SRm160/30…	0.0737	245	C complex spliceosome	0.16	80	0.487603	RNA binding: 5.797e-13	nucleotide binding: 3.467e-08	protein binding: 3.484e-08	RS domain binding: 1.489e-07	ATP-dependent RNA helicase activity: 0.0007334	WD40-repeat domain binding: 0.001453	U5 snRNA binding: 0.001936	nucleic acid binding: 0.002443	ATP-dependent helicase activity: 0.006813	pre-mRNA binding: 0.01056	ubiquitin-ubiquitin ligase activity: 0.01199	U6 snRNA binding: 0.01293	RNA helicase activity: 0.01341	C2H2 zinc finger domain binding: 0.01905	identical protein binding: 0.02835	estrogen receptor binding: 0.03785	enzyme binding: 0.04969	calcium-dependent protein binding: 0.06238	androgen receptor binding: 0.07374	chromatin binding: 0.07986	transcription cofactor activity: 0.08401	helicase activity: 0.09639
1677	20	P67809, Q00839, Q04837, Q15029, P68104, Q07955, O75533, Q15459, P62314, P61978, O43390, Q6P2Q9, P62316, P26368, P09661, Q01081, O75643, Q9UMS4, O43290, P52272,	0.25	0	1	232	(E.F.G)_complex::12S_U11_snRNP::6S_methyltransferase_and_RG-containing_Sm_proteins_complex::20S_methylosome-SmD_complex::20S_methylosome_and_RG-containing_Sm_protein_complex::6S_methyltransferase_complex::JBP1-pICln_complex::SMN_complex,_U7_snRNA_specific::20S_methyltransferase_complex::AR_coactivator_complex::17S_U2_snRNP::SF3A1-SF3A2-SF3A3_complex::SF3b_complex::Exon_junction_complex::SRm160/30…	0.0737	245	C complex spliceosome	0.16	80	0.596491	RNA binding: 1.815e-11	protein binding: 3.484e-08	RS domain binding: 5.113e-05	single-stranded DNA binding: 0.0001601	nucleotide binding: 0.0001779	U5 snRNA binding: 0.001936	ubiquitin-ubiquitin ligase activity: 0.01199	U6 snRNA binding: 0.01293	C2H2 zinc finger domain binding: 0.01905	ATP-dependent RNA helicase activity: 0.03874	translation elongation factor activity: 0.03874	GTPase activity: 0.04461	RNA polymerase II core promoter proximal region sequence-specific DNA binding: 0.05981	chromatin binding: 0.07986	GTP binding: 0.08703	helicase activity: 0.09639
111	18	Q15428, Q12874, Q8WWY3, O75533, Q15459, O43395, Q6P2Q9, Q15427, P62316, O43290, P09661, Q01081, O75643, Q9UMS4, P52272, P62314, O94906, P08579,	0	0	0	0	(E.F.G)_complex::12S_U11_snRNP::6S_methyltransferase_and_RG-containing_Sm_proteins_complex::20S_methylosome-SmD_complex::20S_methylosome_and_RG-containing_Sm_protein_complex::6S_methyltransferase_complex::JBP1-pICln_complex::SMN_complex,_U7_snRNA_specific::20S_methyltransferase_complex::AR_coactivator_complex::17S_U2_snRNP::SF3A1-SF3A2-SF3A3_complex::SF3b_complex::Exon_junction_complex::SRm160/30…	0.0735	245	17S U2 snRNP	0.1684	33	0.608247	RNA binding: 5.524e-08	protein binding: 1.941e-07	ribonucleoprotein complex binding: 0.0003112	nucleotide binding: 0.001286	U5 snRNA binding: 0.001743	snRNP binding: 0.002612	snRNA binding: 0.009087	RS domain binding: 0.009516	ubiquitin-ubiquitin ligase activity: 0.0108	U6 snRNA binding: 0.01165	identical protein binding: 0.02183	nucleic acid binding: 0.03357	ATP-dependent RNA helicase activity: 0.03501	androgen receptor binding: 0.0669	helicase activity: 0.08768
55	18	P26368, O60506, P38159, Q07955, O43143, Q15459, P61978, P52597, O43390, O75533, O43290, P09661, Q01081, P23246, P17844, P52272, Q13243, Q16629,	0	0	0	0	(E.F.G)_complex::12S_U11_snRNP::6S_methyltransferase_and_RG-containing_Sm_proteins_complex::20S_methylosome-SmD_complex::20S_methylosome_and_RG-containing_Sm_protein_complex::6S_methyltransferase_complex::JBP1-pICln_complex::SMN_complex,_U7_snRNA_specific::20S_methyltransferase_complex::AR_coactivator_complex::17S_U2_snRNP::SF3A1-SF3A2-SF3A3_complex::SF3b_complex::Exon_junction_complex::SRm160/30…	0.0735	245	C complex spliceosome	0.1174	80	0.565657	RNA binding: 1.314e-15	nucleotide binding: 2.206e-13	RS domain binding: 1.067e-07	protein binding: 1.941e-07	RNA helicase activity: 6.728e-05	nucleic acid binding: 0.0001925	single-stranded RNA binding: 0.0006959	ATP-dependent helicase activity: 0.005556	pre-mRNA binding: 0.009516	C2H2 zinc finger domain binding: 0.01717	poly(A) RNA binding: 0.0218	core promoter binding: 0.02347	estrogen receptor binding: 0.03419	ATP-dependent RNA helicase activity: 0.03501	enzyme binding: 0.04159	RNA polymerase II core promoter proximal region sequence-specific DNA binding: 0.05417	calcium-dependent protein binding: 0.05651	androgen receptor binding: 0.0669	chromatin binding: 0.06778	transcription cofactor activity: 0.0763	single-stranded DNA binding: 0.08841	RNA polymerase II core promoter proximal region sequence-specific DNA binding transcription factor activity involved in positive regulation of transcription: 0.09629
184	18	Q00839, P26368, P62318, Q96DI7, Q01081, P62316, P62304, P62314, Q6P2Q9, P08621, O75533, O43290, P09661, O75643, Q9UMS4, Q15459, P52272, O94906,	0	0	0	0	(E.F.G)_complex::12S_U11_snRNP::6S_methyltransferase_and_RG-containing_Sm_proteins_complex::20S_methylosome-SmD_complex::20S_methylosome_and_RG-containing_Sm_protein_complex::6S_methyltransferase_complex::JBP1-pICln_complex::SMN_complex,_U7_snRNA_specific::20S_methyltransferase_complex::AR_coactivator_complex::17S_U2_snRNP::SF3A1-SF3A2-SF3A3_complex::SF3b_complex::Exon_junction_complex::SRm160/30…	0.0735	245	C complex spliceosome	0.1778	80	0.4	RNA binding: 9.768e-11	protein binding: 1.941e-07	nucleotide binding: 0.001286	U5 snRNA binding: 0.001743	histone pre-mRNA DCP binding: 0.003914	RS domain binding: 0.009516	ubiquitin-ubiquitin ligase activity: 0.0108	U6 snRNA binding: 0.01165	C2H2 zinc finger domain binding: 0.01717	ribonucleoprotein complex binding: 0.02555	ATP-dependent RNA helicase activity: 0.03501	enzyme binding: 0.04159	androgen receptor binding: 0.0669	helicase activity: 0.08768
409	18	Q00839, Q15029, P62316, P62318, Q07955, O75533, Q15459, P62314, Q6P2Q9, Q13523, O43290, P09661, Q01081, O75643, Q9UMS4, P52272, Q99459, O94906,	0	0	0	0	(E.F.G)_complex::12S_U11_snRNP::6S_methyltransferase_and_RG-containing_Sm_proteins_complex::20S_methylosome-SmD_complex::20S_methylosome_and_RG-containing_Sm_protein_complex::6S_methyltransferase_complex::JBP1-pICln_complex::SMN_complex,_U7_snRNA_specific::20S_methyltransferase_complex::AR_coactivator_complex::17S_U2_snRNP::SF3A1-SF3A2-SF3A3_complex::SF3b_complex::Exon_junction_complex::SRm160/30…	0.0735	245	C complex spliceosome	0.225	80	0.441176	RNA binding: 2.585e-09	protein binding: 1.941e-07	RS domain binding: 4.121e-05	WD40-repeat domain binding: 0.001308	U5 snRNA binding: 0.001743	histone pre-mRNA DCP binding: 0.003914	ubiquitin-ubiquitin ligase activity: 0.0108	U6 snRNA binding: 0.01165	nucleotide binding: 0.01186	ribonucleoprotein complex binding: 0.02555	ATP-dependent RNA helicase activity: 0.03501	androgen receptor binding: 0.0669	chromatin binding: 0.06778	helicase activity: 0.08768
1676	19	Q15233, Q99459, Q01081, O75533, P23246, P62314, O43395, Q13243, Q6P2Q9, P62316, P26368, P09661, P18583, Q15459, O43290, P52272, Q9UMS4, O94906, Q16629,	0	0	0	0	(E.F.G)_complex::12S_U11_snRNP::6S_methyltransferase_and_RG-containing_Sm_proteins_complex::20S_methylosome-SmD_complex::20S_methylosome_and_RG-containing_Sm_protein_complex::6S_methyltransferase_complex::JBP1-pICln_complex::SMN_complex,_U7_snRNA_specific::20S_methyltransferase_complex::AR_coactivator_complex::17S_U2_snRNP::SF3A1-SF3A2-SF3A3_complex::SF3b_complex::Exon_junction_complex::SRm160/30…	0.0696	245	PSF-p54(nrb) complex	0.1053	2	0.504348	RNA binding: 4.746e-15	protein binding: 8.224e-08	RS domain binding: 1.266e-07	nucleotide binding: 4.952e-07	WD40-repeat domain binding: 0.00138	U5 snRNA binding: 0.00184	ubiquitin-ubiquitin ligase activity: 0.01139	U6 snRNA binding: 0.01229	C2H2 zinc finger domain binding: 0.01811	identical protein binding: 0.02499	ribonucleoprotein complex binding: 0.02693	nucleic acid binding: 0.0393	DNA binding: 0.05316	androgen receptor binding: 0.07033	chromatin binding: 0.07379
380	20	Q00839, P26368, Q6EMK4, Q07955, O75533, Q15459, P62314, Q01081, Q6P2Q9, O43175, P62316, O43290, P09661, P23246, O75643, Q9UMS4, Q15029, P17844, P52272, Q99459,	0	0	0	0	(E.F.G)_complex::12S_U11_snRNP::6S_methyltransferase_and_RG-containing_Sm_proteins_complex::20S_methylosome-SmD_complex::20S_methylosome_and_RG-containing_Sm_protein_complex::6S_methyltransferase_complex::JBP1-pICln_complex::SMN_complex,_U7_snRNA_specific::20S_methyltransferase_complex::AR_coactivator_complex::17S_U2_snRNP::SF3A1-SF3A2-SF3A3_complex::SF3b_complex::Exon_junction_complex::SRm160/30…	0.0661	245	C complex spliceosome	0.16	80	0.381356	RNA binding: 4.659e-10	protein binding: 1.225e-05	RS domain binding: 5.113e-05	nucleotide binding: 0.0001779	ATP-dependent RNA helicase activity: 0.0007334	phosphoglycerate dehydrogenase activity: 0.0009691	WD40-repeat domain binding: 0.001453	U5 snRNA binding: 0.001936	ATP-dependent helicase activity: 0.006813	pre-mRNA binding: 0.01056	ubiquitin-ubiquitin ligase activity: 0.01199	U6 snRNA binding: 0.01293	RNA helicase activity: 0.01341	C2H2 zinc finger domain binding: 0.01905	estrogen receptor binding: 0.03785	enzyme binding: 0.04969	calcium-dependent protein binding: 0.06238	NAD binding: 0.06323	androgen receptor binding: 0.07374	chromatin binding: 0.07986	transcription cofactor activity: 0.08401	helicase activity: 0.09639
474	18	P26368, Q07955, Q13435, P62318, Q01081, O75533, Q15459, P62314, Q6P2Q9, O43390, P62316, O15164, O43290, P09661, O75643, P23246, Q15029, P52272,	0	0	0	0	(E.F.G)_complex::12S_U11_snRNP::6S_methyltransferase_and_RG-containing_Sm_proteins_complex::20S_methylosome-SmD_complex::20S_methylosome_and_RG-containing_Sm_protein_complex::6S_methyltransferase_complex::JBP1-pICln_complex::SMN_complex,_U7_snRNA_specific::20S_methyltransferase_complex::AR_coactivator_complex::17S_U2_snRNP::SF3A1-SF3A2-SF3A3_complex::SF3b_complex::Exon_junction_complex::SRm160/30…	0.0655	245	17S U2 snRNP	0.1684	33	0.537634	RNA binding: 2.585e-09	protein binding: 1.941e-07	nucleotide binding: 6.508e-06	RS domain binding: 4.121e-05	U5 snRNA binding: 0.001743	histone pre-mRNA DCP binding: 0.003914	estrogen response element binding: 0.005212	U6 snRNA binding: 0.01165	C2H2 zinc finger domain binding: 0.01717	histone acetyl-lysine binding: 0.02138	ligand-dependent nuclear receptor binding: 0.02679	nucleic acid binding: 0.03357	ATP-dependent RNA helicase activity: 0.03501	enzyme binding: 0.04159	methylated histone residue binding: 0.04628	chromatin binding: 0.06778	p53 binding: 0.07294	helicase activity: 0.08768
43	18	Q00839, P26368, Q9UQ35, P38159, O60506, Q07955, O75533, Q15459, Q13151, P61978, P52597, O43390, O43290, P09661, Q01081, P17844, P52272, P62314,	0	0	0	0	(E.F.G)_complex::12S_U11_snRNP::6S_methyltransferase_and_RG-containing_Sm_proteins_complex::20S_methylosome-SmD_complex::20S_methylosome_and_RG-containing_Sm_protein_complex::6S_methyltransferase_complex::JBP1-pICln_complex::SMN_complex,_U7_snRNA_specific::20S_methyltransferase_complex::AR_coactivator_complex::17S_U2_snRNP::SF3A1-SF3A2-SF3A3_complex::SF3b_complex::Exon_junction_complex::SRm160/30…	0.0655	245	C complex spliceosome	0.1778	80	0.606061	RNA binding: 1.817e-17	nucleotide binding: 4.078e-10	RS domain binding: 4.121e-05	protein binding: 5.497e-05	C2H2 zinc finger domain binding: 0.0001382	single-stranded RNA binding: 0.0006959	pre-mRNA binding: 0.009516	RNA helicase activity: 0.01208	AU-rich element binding: 0.01633	poly(A) RNA binding: 0.0218	core promoter binding: 0.02347	nucleic acid binding: 0.03357	estrogen receptor binding: 0.03419	ATP-dependent RNA helicase activity: 0.03501	enzyme binding: 0.04159	RNA polymerase II core promoter proximal region sequence-specific DNA binding: 0.05417	calcium-dependent protein binding: 0.05651	androgen receptor binding: 0.0669	chromatin binding: 0.06778	transcription cofactor activity: 0.0763	single-stranded DNA binding: 0.08841	RNA polymerase II core promoter proximal region sequence-specific DNA binding transcription factor activity involved in positive regulation of transcription: 0.09629
291	18	Q00839, Q15029, P62318, Q07955, O75533, Q15459, P62314, Q6P2Q9, P62316, P46060, O43290, P09661, Q01081, O75643, Q9UMS4, P52272, Q99459, O94906,	0	0	0	0	(E.F.G)_complex::12S_U11_snRNP::6S_methyltransferase_and_RG-containing_Sm_proteins_complex::20S_methylosome-SmD_complex::20S_methylosome_and_RG-containing_Sm_protein_complex::6S_methyltransferase_complex::JBP1-pICln_complex::SMN_complex,_U7_snRNA_specific::20S_methyltransferase_complex::AR_coactivator_complex::17S_U2_snRNP::SF3A1-SF3A2-SF3A3_complex::SF3b_complex::Exon_junction_complex::SRm160/30…	0.0655	245	C complex spliceosome	0.2007	80	0.441176	RNA binding: 2.585e-09	protein binding: 1.941e-07	RS domain binding: 4.121e-05	WD40-repeat domain binding: 0.001308	U5 snRNA binding: 0.001743	Ran GTPase activator activity: 0.002612	histone pre-mRNA DCP binding: 0.003914	ubiquitin-ubiquitin ligase activity: 0.0108	U6 snRNA binding: 0.01165	nucleotide binding: 0.01186	ribonucleoprotein complex binding: 0.02555	ATP-dependent RNA helicase activity: 0.03501	androgen receptor binding: 0.0669	chromatin binding: 0.06778	helicase activity: 0.08768
1647	18	Q00839, Q14498, Q07955, O75533, Q96PK6, P62314, Q9UMS4, Q6P2Q9, P62316, O43290, P09661, Q01081, O75643, Q15459, P26368, P17844, P52272, O94906,	0	0	0	0	(E.F.G)_complex::12S_U11_snRNP::6S_methyltransferase_and_RG-containing_Sm_proteins_complex::20S_methylosome-SmD_complex::20S_methylosome_and_RG-containing_Sm_protein_complex::6S_methyltransferase_complex::JBP1-pICln_complex::SMN_complex,_U7_snRNA_specific::20S_methyltransferase_complex::AR_coactivator_complex::17S_U2_snRNP::SF3A1-SF3A2-SF3A3_complex::SF3b_complex::Exon_junction_complex::SRm160/30…	0.0655	245	C complex spliceosome	0.1562	80	0.451923	RNA binding: 2.959e-12	protein binding: 1.941e-07	nucleotide binding: 6.508e-06	RS domain binding: 4.121e-05	ATP-dependent RNA helicase activity: 0.0005929	U5 snRNA binding: 0.001743	androgen receptor binding: 0.002256	ATP-dependent helicase activity: 0.005556	nucleic acid binding: 0.007711	pre-mRNA binding: 0.009516	ubiquitin-ubiquitin ligase activity: 0.0108	U6 snRNA binding: 0.01165	RNA helicase activity: 0.01208	C2H2 zinc finger domain binding: 0.01717	ribonucleoprotein complex binding: 0.02555	transcription coactivator activity: 0.03127	estrogen receptor binding: 0.03419	enzyme binding: 0.04159	RNA polymerase II transcription cofactor activity: 0.04469	ligand-dependent nuclear receptor transcription coactivator activity: 0.04827	calcium-dependent protein binding: 0.05651	protein binding bridging: 0.06	transcription cofactor activity: 0.0763	helicase activity: 0.08768
94	16	Q00839, P26368, P62995, Q01081, O75533, P23246, Q07955, Q13243, Q12906, O43390, O43290, P09661, Q12905, Q15459, P52272, Q16629,	0	0	0	0	(E.F.G)_complex::12S_U11_snRNP::6S_methyltransferase_and_RG-containing_Sm_proteins_complex::20S_methylosome-SmD_complex::20S_methylosome_and_RG-containing_Sm_protein_complex::6S_methyltransferase_complex::JBP1-pICln_complex::SMN_complex,_U7_snRNA_specific::20S_methyltransferase_complex::AR_coactivator_complex::17S_U2_snRNP::SF3A1-SF3A2-SF3A3_complex::SF3b_complex::Exon_junction_complex::SRm160/30…	0.0653	245	17S U2 snRNP	0.0682	33	0.670886	RNA binding: 3.21e-13	nucleotide binding: 1.016e-10	RS domain binding: 7.326e-08	protein binding: 1.082e-06	double-stranded RNA binding: 0.0006619	nucleic acid binding: 0.004602	C2H2 zinc finger domain binding: 0.01529	DNA binding: 0.08755	transferase activity: 0.0879	mRNA binding: 0.09808
342	16	Q6P2Q9, P62318, Q01081, P62316, Q15459, P62314, Q07955, O75533, P42285, P09661, O75643, Q9UMS4, P17844, O43290, P52272, O94906,	0.25	1	0	236	(E.F.G)_complex::12S_U11_snRNP::6S_methyltransferase_and_RG-containing_Sm_proteins_complex::20S_methylosome-SmD_complex::20S_methylosome_and_RG-containing_Sm_protein_complex::6S_methyltransferase_complex::JBP1-pICln_complex::SMN_complex,_U7_snRNA_specific::20S_methyltransferase_complex::AR_coactivator_complex::17S_U2_snRNP::SF3A1-SF3A2-SF3A3_complex::SF3b_complex::Exon_junction_complex::SRm160/30…	0.0653	245	C complex spliceosome	0.2	80	0.440476	RNA binding: 3.111e-07	protein binding: 1.082e-06	RS domain binding: 3.235e-05	ATP-dependent helicase activity: 0.0001307	ATP-dependent RNA helicase activity: 0.0004669	U5 snRNA binding: 0.00155	androgen receptor binding: 0.001784	histone pre-mRNA DCP binding: 0.00348	pre-mRNA binding: 0.008467	nucleotide binding: 0.008617	ubiquitin-ubiquitin ligase activity: 0.009612	U6 snRNA binding: 0.01037	RNA helicase activity: 0.01075	hydrolase activity acting on acid anhydrides in phosphorus-containing anhydrides: 0.01341	ribonucleoprotein complex binding: 0.02278	nucleic acid binding: 0.02338	transcription coactivator activity: 0.02535	estrogen receptor binding: 0.03051	enzyme binding: 0.03392	calcium-dependent protein binding: 0.05056	transcription cofactor activity: 0.06845	helicase activity: 0.07877	identical protein binding: 0.09278
1654	16	Q15428, Q12874, Q8WWY3, O75533, Q15459, O43395, Q6P2Q9, Q15427, P62316, O43290, P09661, O75643, Q9UMS4, P62314, O94906, P08579,	0.25	1	0	245	(E.F.G)_complex::12S_U11_snRNP::6S_methyltransferase_and_RG-containing_Sm_proteins_complex::20S_methylosome-SmD_complex::20S_methylosome_and_RG-containing_Sm_protein_complex::6S_methyltransferase_complex::JBP1-pICln_complex::SMN_complex,_U7_snRNA_specific::20S_methyltransferase_complex::AR_coactivator_complex::17S_U2_snRNP::SF3A1-SF3A2-SF3A3_complex::SF3b_complex::Exon_junction_complex::SRm160/30…	0.0653	245	SF3A1-SF3A2-SF3A3 complex	0.1875	3	0.6125	protein binding: 1.082e-06	RNA binding: 5.314e-06	ribonucleoprotein complex binding: 0.0002447	U5 snRNA binding: 0.00155	snRNP binding: 0.002323	snRNA binding: 0.008085	ubiquitin-ubiquitin ligase activity: 0.009612	U6 snRNA binding: 0.01037	identical protein binding: 0.01612	nucleic acid binding: 0.02338	ATP-dependent RNA helicase activity: 0.03124	androgen receptor binding: 0.05994	nucleotide binding: 0.0638	helicase activity: 0.07877	ATP-dependent helicase activity: 0.09238
453	15	Q15428, Q12874, P62316, Q8WWY3, Q9BUQ8, Q15459, O43395, Q6P2Q9, O75533, O43290, P09661, Q01081, Q9UMS4, P62314, O94906,	0	0	0	0	(E.F.G)_complex::12S_U11_snRNP::6S_methyltransferase_and_RG-containing_Sm_proteins_complex::20S_methylosome-SmD_complex::20S_methylosome_and_RG-containing_Sm_protein_complex::6S_methyltransferase_complex::JBP1-pICln_complex::SMN_complex,_U7_snRNA_specific::20S_methyltransferase_complex::AR_coactivator_complex::17S_U2_snRNP::SF3A1-SF3A2-SF3A3_complex::SF3b_complex::Exon_junction_complex::SRm160/30…	0.0612	245	SF3A1-SF3A2-SF3A3 complex	0.2	3	0.657143	protein binding: 2.553e-06	RNA binding: 3.145e-06	ribonucleoprotein complex binding: 0.0002144	U5 snRNA binding: 0.001453	snRNP binding: 0.002178	RS domain binding: 0.007942	ubiquitin-ubiquitin ligase activity: 0.009016	U6 snRNA binding: 0.009731	ATP-dependent RNA helicase activity: 0.02935	androgen receptor binding: 0.05641	helicase activity: 0.07425	nucleic acid binding: 0.07708	identical protein binding: 0.08421	ATP-dependent helicase activity: 0.08716
38	20	Q00839, P26368, Q16181, Q07955, O75533, Q96PK6, O43395, O00422, Q13243, O43390, Q9Y2W1, O43290, P09661, Q01081, Q15459, P23246, P52272, Q13123, O94906, Q16629,	0	0	0	0	(E.F.G)_complex::12S_U11_snRNP::6S_methyltransferase_and_RG-containing_Sm_proteins_complex::20S_methylosome-SmD_complex::20S_methylosome_and_RG-containing_Sm_protein_complex::6S_methyltransferase_complex::JBP1-pICln_complex::SMN_complex,_U7_snRNA_specific::20S_methyltransferase_complex::AR_coactivator_complex::17S_U2_snRNP::SF3A1-SF3A2-SF3A3_complex::SF3b_complex::Exon_junction_complex::SRm160/30…	0.059	245	C complex spliceosome	0.0625	80	0.793388	RNA binding: 5.797e-13	nucleotide binding: 1.331e-09	protein binding: 3.484e-08	RS domain binding: 1.489e-07	RNA polymerase II transcription cofactor activity: 0.001209	ligand-dependent nuclear receptor transcription coactivator activity: 0.001417	nucleic acid binding: 0.01192	vitamin D receptor binding: 0.01764	C2H2 zinc finger domain binding: 0.01905	ribonucleoprotein complex binding: 0.02831	identical protein binding: 0.02835	phosphoprotein binding: 0.03287	thyroid hormone receptor binding: 0.03695	transcription coactivator activity: 0.03758	protein binding bridging: 0.0662	androgen receptor binding: 0.07374	transcription cofactor activity: 0.08401
1669	20	Q00839, P26368, Q16181, Q07955, O75533, Q15459, O43395, Q01081, Q13243, Q6P2Q9, Q9Y2W1, O43290, P09661, P23246, O00422, O75475, P52272, Q13123, O94906, Q16629,	0	0	0	0	(E.F.G)_complex::12S_U11_snRNP::6S_methyltransferase_and_RG-containing_Sm_proteins_complex::20S_methylosome-SmD_complex::20S_methylosome_and_RG-containing_Sm_protein_complex::6S_methyltransferase_complex::JBP1-pICln_complex::SMN_complex,_U7_snRNA_specific::20S_methyltransferase_complex::AR_coactivator_complex::17S_U2_snRNP::SF3A1-SF3A2-SF3A3_complex::SF3b_complex::Exon_junction_complex::SRm160/30…	0.059	245	C complex spliceosome	0.0625	80	0.775862	RNA binding: 1.815e-11	protein binding: 3.484e-08	RS domain binding: 1.489e-07	nucleotide binding: 7.405e-07	supercoiled DNA binding: 0.0004848	U5 snRNA binding: 0.001936	U6 snRNA binding: 0.01293	vitamin D receptor binding: 0.01764	C2H2 zinc finger domain binding: 0.01905	RNA polymerase II transcription coactivator activity: 0.02647	ribonucleoprotein complex binding: 0.02831	identical protein binding: 0.02835	phosphoprotein binding: 0.03287	thyroid hormone receptor binding: 0.03695	transcription coactivator activity: 0.03758	activating transcription factor binding: 0.04499	RNA polymerase II transcription cofactor activity: 0.0494	ligand-dependent nuclear receptor transcription coactivator activity: 0.05333	androgen receptor binding: 0.07374	chromatin binding: 0.07986	transcription cofactor activity: 0.08401
1687	20	Q00839, P26368, Q07955, Q15019, Q16181, O00422, Q15459, O43395, Q01081, Q13243, Q99459, Q9BYV6, P09661, Q9UMS4, Q6P2Q9, O43290, P52272, Q13123, O94906, Q16629,	0	0	0	0	(E.F.G)_complex::12S_U11_snRNP::6S_methyltransferase_and_RG-containing_Sm_proteins_complex::20S_methylosome-SmD_complex::20S_methylosome_and_RG-containing_Sm_protein_complex::6S_methyltransferase_complex::JBP1-pICln_complex::SMN_complex,_U7_snRNA_specific::20S_methyltransferase_complex::AR_coactivator_complex::17S_U2_snRNP::SF3A1-SF3A2-SF3A3_complex::SF3b_complex::Exon_junction_complex::SRm160/30…	0.059	245	C complex spliceosome	0.0756	80	0.663934	RNA binding: 1.815e-11	RS domain binding: 1.489e-07	protein binding: 9.481e-07	nucleotide binding: 1.284e-05	identical protein binding: 0.0005332	WD40-repeat domain binding: 0.001453	U5 snRNA binding: 0.001936	ubiquitin-ubiquitin ligase activity: 0.01199	U6 snRNA binding: 0.01293	C2H2 zinc finger domain binding: 0.01905	enzyme regulator activity: 0.02323	ribonucleoprotein complex binding: 0.02831	protein complex scaffold: 0.04499	androgen receptor binding: 0.07374	GTP binding: 0.08703
163	20	Q92542, Q9UMS4, P26368, Q07955, Q15019, Q16181, Q01081, O94906, O43395, O00422, Q13243, Q6P2Q9, O43290, P09661, P49756, Q15459, Q16629, P52272, Q13123, Q00839,	0	0	0	0	(E.F.G)_complex::12S_U11_snRNP::6S_methyltransferase_and_RG-containing_Sm_proteins_complex::20S_methylosome-SmD_complex::20S_methylosome_and_RG-containing_Sm_protein_complex::6S_methyltransferase_complex::JBP1-pICln_complex::SMN_complex,_U7_snRNA_specific::20S_methyltransferase_complex::AR_coactivator_complex::17S_U2_snRNP::SF3A1-SF3A2-SF3A3_complex::SF3b_complex::Exon_junction_complex::SRm160/30…	0.059	245	Spliceosome	0.0685	143	0.7	RNA binding: 4.659e-10	protein binding: 3.484e-08	RS domain binding: 1.489e-07	nucleotide binding: 7.405e-07	U5 snRNA binding: 0.001936	identical protein binding: 0.004482	ubiquitin-ubiquitin ligase activity: 0.01199	U6 snRNA binding: 0.01293	C2H2 zinc finger domain binding: 0.01905	enzyme regulator activity: 0.02323	ribonucleoprotein complex binding: 0.02831	protein complex scaffold: 0.04499	nucleic acid binding: 0.0454	endopeptidase activity: 0.06408	androgen receptor binding: 0.07374	GTP binding: 0.08703
1699	20	Q6P2Q9, O43395, P62316, Q01081, P55769, P18583, P18754, Q13243, Q15459, P26368, O75533, O43290, O94906, P23246, Q9UMS4, P09661, P52272, Q99459, P62826, Q16629,	0	0	0	0	(E.F.G)_complex::12S_U11_snRNP::6S_methyltransferase_and_RG-containing_Sm_proteins_complex::20S_methylosome-SmD_complex::20S_methylosome_and_RG-containing_Sm_protein_complex::6S_methyltransferase_complex::JBP1-pICln_complex::SMN_complex,_U7_snRNA_specific::20S_methyltransferase_complex::AR_coactivator_complex::17S_U2_snRNP::SF3A1-SF3A2-SF3A3_complex::SF3b_complex::Exon_junction_complex::SRm160/30…	0.059	245	Spliceosome	0.0787	143	0.557522	RNA binding: 5.797e-13	protein binding: 3.484e-08	RS domain binding: 1.489e-07	nucleotide binding: 1.284e-05	chromatin binding: 0.001444	WD40-repeat domain binding: 0.001453	U5 snRNA binding: 0.001936	androgen receptor binding: 0.00278	ubiquitin-ubiquitin ligase activity: 0.01199	nucleosomal DNA binding: 0.01246	U6 snRNA binding: 0.01293	snoRNA binding: 0.01435	Ran guanyl-nucleotide exchange factor activity: 0.01529	C2H2 zinc finger domain binding: 0.01905	ribonucleoprotein complex binding: 0.02831	transcription coactivator activity: 0.03758	histone binding: 0.08401
72	18	Q00839, Q96PK6, P26368, Q07955, O75533, Q15459, P62314, Q01081, Q6P2Q9, P62316, O43290, P09661, O75643, Q9UI30, P17844, P52272, Q9UMS4, O94906,	0	0	0	0	(E.F.G)_complex::12S_U11_snRNP::6S_methyltransferase_and_RG-containing_Sm_proteins_complex::20S_methylosome-SmD_complex::20S_methylosome_and_RG-containing_Sm_protein_complex::6S_methyltransferase_complex::JBP1-pICln_complex::SMN_complex,_U7_snRNA_specific::20S_methyltransferase_complex::AR_coactivator_complex::17S_U2_snRNP::SF3A1-SF3A2-SF3A3_complex::SF3b_complex::Exon_junction_complex::SRm160/30…	0.058	245	C complex spliceosome	0.1562	80	0.490566	RNA binding: 9.768e-11	protein binding: 1.941e-07	RS domain binding: 4.121e-05	nucleotide binding: 0.0001041	ATP-dependent RNA helicase activity: 0.0005929	U5 snRNA binding: 0.001743	androgen receptor binding: 0.002256	ATP-dependent helicase activity: 0.005556	pre-mRNA binding: 0.009516	ubiquitin-ubiquitin ligase activity: 0.0108	U6 snRNA binding: 0.01165	RNA helicase activity: 0.01208	C2H2 zinc finger domain binding: 0.01717	protein methyltransferase activity: 0.01802	ribonucleoprotein complex binding: 0.02555	transcription coactivator activity: 0.03127	nucleic acid binding: 0.03357	estrogen receptor binding: 0.03419	enzyme binding: 0.04159	RNA polymerase II transcription cofactor activity: 0.04469	ligand-dependent nuclear receptor transcription coactivator activity: 0.04827	calcium-dependent protein binding: 0.05651	protein binding bridging: 0.06	transcription cofactor activity: 0.0763	helicase activity: 0.08768
116	18	Q00839, P26368, Q07955, O60506, Q16540, O75533, Q15459, P61978, Q13243, Q12906, O43390, O43290, P09661, Q01081, P23246, Q9UQ35, P52272, P82933,	0	0	0	0	(E.F.G)_complex::12S_U11_snRNP::6S_methyltransferase_and_RG-containing_Sm_proteins_complex::20S_methylosome-SmD_complex::20S_methylosome_and_RG-containing_Sm_protein_complex::6S_methyltransferase_complex::JBP1-pICln_complex::SMN_complex,_U7_snRNA_specific::20S_methyltransferase_complex::AR_coactivator_complex::17S_U2_snRNP::SF3A1-SF3A2-SF3A3_complex::SF3b_complex::Exon_junction_complex::SRm160/30…	0.058	245	C complex spliceosome	0.1	80	0.776596	RNA binding: 1.817e-17	nucleotide binding: 4.078e-10	RS domain binding: 1.067e-07	protein binding: 5.497e-05	C2H2 zinc finger domain binding: 0.0001382	structural constituent of ribosome: 0.01874	poly(A) RNA binding: 0.0218	double-stranded RNA binding: 0.04148	RNA polymerase II core promoter proximal region sequence-specific DNA binding: 0.05417	single-stranded DNA binding: 0.08841	RNA polymerase II core promoter proximal region sequence-specific DNA binding transcription factor activity involved in positive regulation of transcription: 0.09629
185	18	P18754, P26368, P38159, Q07955, O75533, Q15459, P62314, P61978, O43390, P62316, O43290, P09661, Q01081, Q96PK6, P23246, P17844, P52272, Q9UMS4,	2.25	0	3	259.333	(E.F.G)_complex::12S_U11_snRNP::6S_methyltransferase_and_RG-containing_Sm_proteins_complex::20S_methylosome-SmD_complex::20S_methylosome_and_RG-containing_Sm_protein_complex::6S_methyltransferase_complex::JBP1-pICln_complex::SMN_complex,_U7_snRNA_specific::20S_methyltransferase_complex::AR_coactivator_complex::17S_U2_snRNP::SF3A1-SF3A2-SF3A3_complex::SF3b_complex::Exon_junction_complex::SRm160/30…	0.058	245	C complex spliceosome	0.1361	80	0.597938	RNA binding: 2.959e-12	nucleotide binding: 1.275e-08	protein binding: 1.941e-07	RS domain binding: 4.121e-05	nucleic acid binding: 0.007711	pre-mRNA binding: 0.009516	chromatin binding: 0.009629	ubiquitin-ubiquitin ligase activity: 0.0108	nucleosomal DNA binding: 0.01123	RNA helicase activity: 0.01208	Ran guanyl-nucleotide exchange factor activity: 0.01378	C2H2 zinc finger domain binding: 0.01717	core promoter binding: 0.02347	estrogen receptor binding: 0.03419	ATP-dependent RNA helicase activity: 0.03501	single-stranded RNA binding: 0.03785	enzyme binding: 0.04159	RNA polymerase II transcription cofactor activity: 0.04469	ligand-dependent nuclear receptor transcription coactivator activity: 0.04827	RNA polymerase II core promoter proximal region sequence-specific DNA binding: 0.05417	calcium-dependent protein binding: 0.05651	protein binding bridging: 0.06	androgen receptor binding: 0.0669	histone binding: 0.0763	transcription cofactor activity: 0.0763	single-stranded DNA binding: 0.08841	RNA polymerase II core promoter proximal region sequence-specific DNA binding transcription factor activity involved in positive regulation of transcription: 0.09629
384	18	Q00839, Q7Z6Z7, Q15029, P62318, Q07955, O75533, Q15459, P62314, Q6P2Q9, P62316, P46060, O43290, P09661, Q01081, O75643, Q9UMS4, P52272, O94906,	0	0	0	0	(E.F.G)_complex::12S_U11_snRNP::6S_methyltransferase_and_RG-containing_Sm_proteins_complex::20S_methylosome-SmD_complex::20S_methylosome_and_RG-containing_Sm_protein_complex::6S_methyltransferase_complex::JBP1-pICln_complex::SMN_complex,_U7_snRNA_specific::20S_methyltransferase_complex::AR_coactivator_complex::17S_U2_snRNP::SF3A1-SF3A2-SF3A3_complex::SF3b_complex::Exon_junction_complex::SRm160/30…	0.058	245	C complex spliceosome	0.1778	80	0.46875	RNA binding: 5.524e-08	protein binding: 1.941e-07	RS domain binding: 4.121e-05	U5 snRNA binding: 0.001743	Ran GTPase activator activity: 0.002612	histone pre-mRNA DCP binding: 0.003914	ubiquitin-ubiquitin ligase activity: 0.0108	U6 snRNA binding: 0.01165	nucleotide binding: 0.01186	ribonucleoprotein complex binding: 0.02555	ATP-dependent RNA helicase activity: 0.03501	ubiquitin-protein ligase activity: 0.0364	androgen receptor binding: 0.0669	helicase activity: 0.08768
1713	18	Q00839, Q7Z6Z7, Q15029, Q07955, P62316, Q15459, P62314, Q6P2Q9, O75533, P46060, O43290, P09661, Q01081, O75643, Q9UMS4, P52272, Q99459, O94906,	0	0	0	0	(E.F.G)_complex::12S_U11_snRNP::6S_methyltransferase_and_RG-containing_Sm_proteins_complex::20S_methylosome-SmD_complex::20S_methylosome_and_RG-containing_Sm_protein_complex::6S_methyltransferase_complex::JBP1-pICln_complex::SMN_complex,_U7_snRNA_specific::20S_methyltransferase_complex::AR_coactivator_complex::17S_U2_snRNP::SF3A1-SF3A2-SF3A3_complex::SF3b_complex::Exon_junction_complex::SRm160/30…	0.058	245	C complex spliceosome	0.1778	80	0.46875	RNA binding: 2.585e-09	protein binding: 1.941e-07	RS domain binding: 4.121e-05	WD40-repeat domain binding: 0.001308	U5 snRNA binding: 0.001743	Ran GTPase activator activity: 0.002612	ubiquitin-ubiquitin ligase activity: 0.0108	U6 snRNA binding: 0.01165	nucleotide binding: 0.01186	ribonucleoprotein complex binding: 0.02555	ATP-dependent RNA helicase activity: 0.03501	ubiquitin-protein ligase activity: 0.0364	androgen receptor binding: 0.0669	chromatin binding: 0.06778	helicase activity: 0.08768
1660	16	Q00839, Q53GS9, P26368, Q16181, Q01081, O75533, Q15459, Q07955, Q13243, O43290, P09661, P23246, O00422, P52272, Q13123, Q16629,	0	0	0	0	(E.F.G)_complex::12S_U11_snRNP::6S_methyltransferase_and_RG-containing_Sm_proteins_complex::20S_methylosome-SmD_complex::20S_methylosome_and_RG-containing_Sm_protein_complex::6S_methyltransferase_complex::JBP1-pICln_complex::SMN_complex,_U7_snRNA_specific::20S_methyltransferase_complex::AR_coactivator_complex::17S_U2_snRNP::SF3A1-SF3A2-SF3A3_complex::SF3b_complex::Exon_junction_complex::SRm160/30…	0.0574	245	17S U2 snRNP	0.0682	33	0.675	RNA binding: 5.234e-10	RS domain binding: 7.326e-08	nucleotide binding: 1.224e-07	protein binding: 2.354e-05	C2H2 zinc finger domain binding: 0.01529	nucleic acid binding: 0.08768	ubiquitin thiolesterase activity: 0.08982	identical protein binding: 0.09278
1656	16	P26368, O60506, P38159, Q07955, O75533, Q15459, P61978, P52597, O43390, O43143, P09661, Q01081, P49792, P17844, P52272, Q9UQ35,	0.25	1	0	183	(E.F.G)_complex::12S_U11_snRNP::6S_methyltransferase_and_RG-containing_Sm_proteins_complex::20S_methylosome-SmD_complex::20S_methylosome_and_RG-containing_Sm_protein_complex::6S_methyltransferase_complex::JBP1-pICln_complex::SMN_complex,_U7_snRNA_specific::20S_methyltransferase_complex::AR_coactivator_complex::17S_U2_snRNP::SF3A1-SF3A2-SF3A3_complex::SF3b_complex::Exon_junction_complex::SRm160/30…	0.0574	245	C complex spliceosome	0.132	80	0.584416	RNA binding: 5.127e-15	nucleotide binding: 3.968e-09	protein binding: 2.354e-05	RS domain binding: 3.235e-05	RNA helicase activity: 5.284e-05	C2H2 zinc finger domain binding: 0.0001086	single-stranded RNA binding: 0.0005481	ATP-dependent helicase activity: 0.004413	nucleic acid binding: 0.004602	pre-mRNA binding: 0.008467	poly(A) RNA binding: 0.01942	core promoter binding: 0.02092	estrogen receptor binding: 0.03051	ATP-dependent RNA helicase activity: 0.03124	enzyme binding: 0.03392	Ran GTPase binding: 0.03885	peptidyl-prolyl cis-trans isomerase activity: 0.0474	RNA polymerase II core promoter proximal region sequence-specific DNA binding: 0.04846	calcium-dependent protein binding: 0.05056	chromatin binding: 0.05603	androgen receptor binding: 0.05994	transcription cofactor activity: 0.06845	single-stranded DNA binding: 0.07943	RNA polymerase II core promoter proximal region sequence-specific DNA binding transcription factor activity involved in positive regulation of transcription: 0.0866	ligase activity: 0.09682	mRNA binding: 0.09808
1688	16	Q00839, Q53GS9, P26368, O00422, P55769, Q15459, Q01081, Q13243, O43290, P09661, P23246, O94906, P07910, Q13641, P52272, Q16629,	0	0	0	0	(E.F.G)_complex::12S_U11_snRNP::6S_methyltransferase_and_RG-containing_Sm_proteins_complex::20S_methylosome-SmD_complex::20S_methylosome_and_RG-containing_Sm_protein_complex::6S_methyltransferase_complex::JBP1-pICln_complex::SMN_complex,_U7_snRNA_specific::20S_methyltransferase_complex::AR_coactivator_complex::17S_U2_snRNP::SF3A1-SF3A2-SF3A3_complex::SF3b_complex::Exon_junction_complex::SRm160/30…	0.0574	245	C complex spliceosome	0.05	80	0.525641	RNA binding: 3.21e-13	nucleotide binding: 1.224e-07	RS domain binding: 3.235e-05	protein binding: 0.0002402	snoRNA binding: 0.01151	C2H2 zinc finger domain binding: 0.01529	ribonucleoprotein complex binding: 0.02278	androgen receptor binding: 0.05994	nucleic acid binding: 0.08768	ubiquitin thiolesterase activity: 0.08982	mRNA binding: 0.09808
302	16	Q15428, Q12874, P62316, Q8WWY3, O94842, Q15459, O43395, Q6P2Q9, O75533, O43290, P09661, Q01081, Q9UMS4, P17844, P52272, P62314,	0	0	0	0	(E.F.G)_complex::12S_U11_snRNP::6S_methyltransferase_and_RG-containing_Sm_proteins_complex::20S_methylosome-SmD_complex::20S_methylosome_and_RG-containing_Sm_protein_complex::6S_methyltransferase_complex::JBP1-pICln_complex::SMN_complex,_U7_snRNA_specific::20S_methyltransferase_complex::AR_coactivator_complex::17S_U2_snRNP::SF3A1-SF3A2-SF3A3_complex::SF3b_complex::Exon_junction_complex::SRm160/30…	0.0574	245	SF3A1-SF3A2-SF3A3 complex	0.1875	3	0.589744	protein binding: 1.082e-06	RNA binding: 5.314e-06	U5 snRNA binding: 0.00155	snRNP binding: 0.002323	pre-mRNA binding: 0.008467	RS domain binding: 0.008467	ubiquitin-ubiquitin ligase activity: 0.009612	U6 snRNA binding: 0.01037	RNA helicase activity: 0.01075	ribonucleoprotein complex binding: 0.02278	estrogen receptor binding: 0.03051	ATP-dependent RNA helicase activity: 0.03124	calcium-dependent protein binding: 0.05056	androgen receptor binding: 0.05994	nucleotide binding: 0.0638	transcription cofactor activity: 0.06845	nucleic acid binding: 0.08768	ATP-dependent helicase activity: 0.09238	identical protein binding: 0.09278
535	16	Q15428, Q12874, Q8WWY3, O75533, Q15459, O43395, Q9UJT2, Q6P2Q9, P62316, O43290, P09661, Q01081, Q9UMS4, P17844, P52272, P62314,	0	0	0	0	(E.F.G)_complex::12S_U11_snRNP::6S_methyltransferase_and_RG-containing_Sm_proteins_complex::20S_methylosome-SmD_complex::20S_methylosome_and_RG-containing_Sm_protein_complex::6S_methyltransferase_complex::JBP1-pICln_complex::SMN_complex,_U7_snRNA_specific::20S_methyltransferase_complex::AR_coactivator_complex::17S_U2_snRNP::SF3A1-SF3A2-SF3A3_complex::SF3b_complex::Exon_junction_complex::SRm160/30…	0.0574	245	SF3A1-SF3A2-SF3A3 complex	0.1875	3	0.597403	protein binding: 1.082e-06	RNA binding: 5.314e-06	U5 snRNA binding: 0.00155	snRNP binding: 0.002323	pre-mRNA binding: 0.008467	RS domain binding: 0.008467	ubiquitin-ubiquitin ligase activity: 0.009612	U6 snRNA binding: 0.01037	RNA helicase activity: 0.01075	ribonucleoprotein complex binding: 0.02278	estrogen receptor binding: 0.03051	ATP-dependent RNA helicase activity: 0.03124	calcium-dependent protein binding: 0.05056	androgen receptor binding: 0.05994	nucleotide binding: 0.0638	transcription cofactor activity: 0.06845	nucleic acid binding: 0.08768	ATP-dependent helicase activity: 0.09238	identical protein binding: 0.09278
50	21	Q92542, P26368, Q15019, Q01081, P62316, O94906, O43395, O00422, Q13243, Q15459, Q6P2Q9, P55769, O43290, P09661, P06702, Q9Y5B9, P62314, Q16629, P52272, Q9UMS4, Q00839,	0	0	0	0	(E.F.G)_complex::12S_U11_snRNP::6S_methyltransferase_and_RG-containing_Sm_proteins_complex::20S_methylosome-SmD_complex::20S_methylosome_and_RG-containing_Sm_protein_complex::6S_methyltransferase_complex::JBP1-pICln_complex::SMN_complex,_U7_snRNA_specific::20S_methyltransferase_complex::AR_coactivator_complex::17S_U2_snRNP::SF3A1-SF3A2-SF3A3_complex::SF3b_complex::Exon_junction_complex::SRm160/30…	0.0562	245	C complex spliceosome	0.072	80	0.639098	RNA binding: 4.025e-11	protein binding: 1.476e-08	RS domain binding: 5.648e-05	nucleotide binding: 0.0002269	U5 snRNA binding: 0.002033	Toll-like receptor 4 binding: 0.003553	RAGE receptor binding: 0.007082	arachidonic acid binding: 0.009087	ubiquitin-ubiquitin ligase activity: 0.01258	U6 snRNA binding: 0.01357	snoRNA binding: 0.01506	C2H2 zinc finger domain binding: 0.01998	antioxidant activity: 0.02193	enzyme regulator activity: 0.02437	ribonucleoprotein complex binding: 0.02968	protein complex scaffold: 0.04713	endopeptidase activity: 0.06705	androgen receptor binding: 0.07712
1640	20	Q00839, P26368, P18583, O43395, Q01081, P55769, O94906, P12270, O00422, Q13243, Q15459, Q6P2Q9, O75533, O43290, P09661, P23246, Q15019, P06702, P52272, Q16629,	0	0	0	0	(E.F.G)_complex::12S_U11_snRNP::6S_methyltransferase_and_RG-containing_Sm_proteins_complex::20S_methylosome-SmD_complex::20S_methylosome_and_RG-containing_Sm_protein_complex::6S_methyltransferase_complex::JBP1-pICln_complex::SMN_complex,_U7_snRNA_specific::20S_methyltransferase_complex::AR_coactivator_complex::17S_U2_snRNP::SF3A1-SF3A2-SF3A3_complex::SF3b_complex::Exon_junction_complex::SRm160/30…	0.0522	245	C complex spliceosome	0.0506	80	0.741935	RNA binding: 5.797e-13	protein binding: 3.484e-08	RS domain binding: 1.489e-07	nucleotide binding: 1.284e-05	U5 snRNA binding: 0.001936	Toll-like receptor 4 binding: 0.003384	dynein complex binding: 0.005308	protein anchor: 0.005308	serine-tRNA ligase activity: 0.005788	RAGE receptor binding: 0.006747	arachidonic acid binding: 0.008658	U6 snRNA binding: 0.01293	snoRNA binding: 0.01435	mitogen-activated protein kinase binding: 0.01764	C2H2 zinc finger domain binding: 0.01905	nucleocytoplasmic transporter activity: 0.01998	antioxidant activity: 0.02091	enzyme regulator activity: 0.02323	ribonucleoprotein complex binding: 0.02831	heat shock protein binding: 0.0306	protein complex scaffold: 0.04499	tubulin binding: 0.06535	androgen receptor binding: 0.07374	chromatin binding: 0.07986
356	14	P26368, Q15029, Q07666, Q07955, O75533, P23246, P61978, Q13243, O43390, O43290, O75643, Q15459, P07910, P52272,	0	0	0	0	(E.F.G)_complex::12S_U11_snRNP::6S_methyltransferase_and_RG-containing_Sm_proteins_complex::20S_methylosome-SmD_complex::20S_methylosome_and_RG-containing_Sm_protein_complex::6S_methyltransferase_complex::JBP1-pICln_complex::SMN_complex,_U7_snRNA_specific::20S_methyltransferase_complex::AR_coactivator_complex::17S_U2_snRNP::SF3A1-SF3A2-SF3A3_complex::SF3b_complex::Exon_junction_complex::SRm160/30…	0.0493	245	C complex spliceosome	0.0893	80	0.65	RNA binding: 7.24e-11	nucleotide binding: 3.887e-08	protein binding: 6.026e-06	RS domain binding: 2.456e-05	nucleic acid binding: 0.002469	C2H2 zinc finger domain binding: 0.01341	ATP-dependent RNA helicase activity: 0.02745	SH3/SH2 adaptor activity: 0.04267	RNA polymerase II core promoter proximal region sequence-specific DNA binding: 0.04267	helicase activity: 0.06967	single-stranded DNA binding: 0.07025	identical protein binding: 0.0757	RNA polymerase II core promoter proximal region sequence-specific DNA binding transcription factor activity involved in positive regulation of transcription: 0.07668	ATP-dependent helicase activity: 0.08187	mRNA binding: 0.08699
415	14	P67809, Q00839, P26368, Q07955, P49257, P62316, Q15459, P62314, P61978, Q6P2Q9, O43290, P09661, Q01081, O75643,	0	0	0	0	(E.F.G)_complex::12S_U11_snRNP::6S_methyltransferase_and_RG-containing_Sm_proteins_complex::20S_methylosome-SmD_complex::20S_methylosome_and_RG-containing_Sm_protein_complex::6S_methyltransferase_complex::JBP1-pICln_complex::SMN_complex,_U7_snRNA_specific::20S_methyltransferase_complex::AR_coactivator_complex::17S_U2_snRNP::SF3A1-SF3A2-SF3A3_complex::SF3b_complex::Exon_junction_complex::SRm160/30…	0.0493	245	C complex spliceosome	0.108	80	0.534483	RNA binding: 7.24e-11	protein binding: 6.026e-06	RS domain binding: 2.456e-05	U5 snRNA binding: 0.001356	single-stranded DNA binding: 0.00246	nucleotide binding: 0.00593	U6 snRNA binding: 0.009088	C2H2 zinc finger domain binding: 0.01341	mannose binding: 0.01572	ATP-dependent RNA helicase activity: 0.02745	RNA polymerase II core promoter proximal region sequence-specific DNA binding: 0.04267	helicase activity: 0.06967	RNA polymerase II core promoter proximal region sequence-specific DNA binding transcription factor activity involved in positive regulation of transcription: 0.07668	ATP-dependent helicase activity: 0.08187	double-stranded DNA binding: 0.09706
21	19	Q00839, P26368, O43395, Q01081, P55769, O94906, P12270, O00422, Q13243, Q15459, Q6P2Q9, Q9Y2W1, O43290, P09661, P23246, Q15019, P06702, P52272, Q16629,	0	0	0	0	(E.F.G)_complex::12S_U11_snRNP::6S_methyltransferase_and_RG-containing_Sm_proteins_complex::20S_methylosome-SmD_complex::20S_methylosome_and_RG-containing_Sm_protein_complex::6S_methyltransferase_complex::JBP1-pICln_complex::SMN_complex,_U7_snRNA_specific::20S_methyltransferase_complex::AR_coactivator_complex::17S_U2_snRNP::SF3A1-SF3A2-SF3A3_complex::SF3b_complex::Exon_junction_complex::SRm160/30…	0.0483	245	Spliceosome	0.0445	143	0.763158	RNA binding: 7.636e-12	protein binding: 8.224e-08	nucleotide binding: 9.245e-06	RS domain binding: 4.604e-05	U5 snRNA binding: 0.00184	Toll-like receptor 4 binding: 0.003215	dynein complex binding: 0.005044	protein anchor: 0.005044	serine-tRNA ligase activity: 0.0055	RAGE receptor binding: 0.006411	arachidonic acid binding: 0.008229	U6 snRNA binding: 0.01229	snoRNA binding: 0.01364	mitogen-activated protein kinase binding: 0.01677	vitamin D receptor binding: 0.01677	C2H2 zinc finger domain binding: 0.01811	nucleocytoplasmic transporter activity: 0.019	antioxidant activity: 0.01989	enzyme regulator activity: 0.0221	ribonucleoprotein complex binding: 0.02693	heat shock protein binding: 0.02911	phosphoprotein binding: 0.03128	transcription coactivator activity: 0.03438	thyroid hormone receptor binding: 0.03516	protein complex scaffold: 0.04284	RNA polymerase II transcription cofactor activity: 0.04705	ligand-dependent nuclear receptor transcription coactivator activity: 0.05081	tubulin binding: 0.0623	androgen receptor binding: 0.07033	transcription cofactor activity: 0.08017
1719	18	Q00839, P26368, P18583, O43395, O00422, P55769, O94906, P12270, Q01081, Q13243, Q9BXP5, O43290, P09661, P23246, Q15019, P06702, P52272, Q16629,	0	0	0	0	(E.F.G)_complex::12S_U11_snRNP::6S_methyltransferase_and_RG-containing_Sm_proteins_complex::20S_methylosome-SmD_complex::20S_methylosome_and_RG-containing_Sm_protein_complex::6S_methyltransferase_complex::JBP1-pICln_complex::SMN_complex,_U7_snRNA_specific::20S_methyltransferase_complex::AR_coactivator_complex::17S_U2_snRNP::SF3A1-SF3A2-SF3A3_complex::SF3b_complex::Exon_junction_complex::SRm160/30…	0.0444	245	Spliceosome	0.0389	143	0.714286	RNA binding: 9.768e-11	RS domain binding: 1.067e-07	protein binding: 1.941e-07	nucleotide binding: 6.508e-06	Toll-like receptor 4 binding: 0.003047	dynein complex binding: 0.00478	protein anchor: 0.00478	serine-tRNA ligase activity: 0.005212	RAGE receptor binding: 0.006076	arachidonic acid binding: 0.007799	snoRNA binding: 0.01293	mitogen-activated protein kinase binding: 0.01591	C2H2 zinc finger domain binding: 0.01717	nucleocytoplasmic transporter activity: 0.01802	antioxidant activity: 0.01886	enzyme regulator activity: 0.02096	ribonucleoprotein complex binding: 0.02555	heat shock protein binding: 0.02762	protein complex scaffold: 0.04068	tubulin binding: 0.05923	androgen receptor binding: 0.0669
428	16	Q00839, P26368, O00422, P55769, O94906, P12270, Q01081, Q13243, Q9BXP5, O43290, P09661, P23246, Q15019, P06702, P52272, Q16629,	0	0	0	0	(E.F.G)_complex::12S_U11_snRNP::6S_methyltransferase_and_RG-containing_Sm_proteins_complex::20S_methylosome-SmD_complex::20S_methylosome_and_RG-containing_Sm_protein_complex::6S_methyltransferase_complex::JBP1-pICln_complex::SMN_complex,_U7_snRNA_specific::20S_methyltransferase_complex::AR_coactivator_complex::17S_U2_snRNP::SF3A1-SF3A2-SF3A3_complex::SF3b_complex::Exon_junction_complex::SRm160/30…	0.0431	245	Spliceosome	0.0354	143	0.725	RNA binding: 5.234e-10	protein binding: 1.082e-06	nucleotide binding: 2.972e-06	RS domain binding: 3.235e-05	Toll-like receptor 4 binding: 0.002709	dynein complex binding: 0.004251	protein anchor: 0.004251	serine-tRNA ligase activity: 0.004635	RAGE receptor binding: 0.005404	arachidonic acid binding: 0.006938	snoRNA binding: 0.01151	mitogen-activated protein kinase binding: 0.01416	C2H2 zinc finger domain binding: 0.01529	nucleocytoplasmic transporter activity: 0.01605	antioxidant activity: 0.0168	enzyme regulator activity: 0.01867	ribonucleoprotein complex binding: 0.02278	heat shock protein binding: 0.02463	protein complex scaffold: 0.03633	tubulin binding: 0.05301	androgen receptor binding: 0.05994	mRNA binding: 0.09808
226	14	Q9UBU9, O60506, P38159, Q07955, O43143, Q15459, Q13151, P61978, P52597, O43390, O75533, P26368, P17844, P52272,	0	0	0	0	(E.F.G)_complex::12S_U11_snRNP::6S_methyltransferase_and_RG-containing_Sm_proteins_complex::20S_methylosome-SmD_complex::20S_methylosome_and_RG-containing_Sm_protein_complex::6S_methyltransferase_complex::JBP1-pICln_complex::SMN_complex,_U7_snRNA_specific::20S_methyltransferase_complex::AR_coactivator_complex::17S_U2_snRNP::SF3A1-SF3A2-SF3A3_complex::SF3b_complex::Exon_junction_complex::SRm160/30…	0.042	245	C complex spliceosome	0.0893	80	0.5	RNA binding: 1.368e-12	nucleotide binding: 1.881e-11	RNA helicase activity: 4.012e-05	protein binding: 0.0001148	single-stranded RNA binding: 0.0004174	nucleic acid binding: 0.002469	ATP-dependent helicase activity: 0.003389	mRNA binding: 0.003851	pre-mRNA binding: 0.007417	RS domain binding: 0.007417	AU-rich element binding: 0.01275	C2H2 zinc finger domain binding: 0.01341	nucleocytoplasmic transporter activity: 0.01407	poly(A) RNA binding: 0.01704	core promoter binding: 0.01835	enzyme binding: 0.02674	estrogen receptor binding: 0.0268	ATP-dependent RNA helicase activity: 0.02745	RNA polymerase II core promoter proximal region sequence-specific DNA binding: 0.04267	calcium-dependent protein binding: 0.04454	chromatin binding: 0.04478	androgen receptor binding: 0.05286	transcription cofactor activity: 0.06044	single-stranded DNA binding: 0.07025	RNA polymerase II core promoter proximal region sequence-specific DNA binding transcription factor activity involved in positive regulation of transcription: 0.07668
334	14	P26368, O60506, P38159, Q07955, O75533, Q15459, Q13151, P61978, P52597, O43390, O43143, P56589, P17844, P52272,	0	0	0	0	(E.F.G)_complex::12S_U11_snRNP::6S_methyltransferase_and_RG-containing_Sm_proteins_complex::20S_methylosome-SmD_complex::20S_methylosome_and_RG-containing_Sm_protein_complex::6S_methyltransferase_complex::JBP1-pICln_complex::SMN_complex,_U7_snRNA_specific::20S_methyltransferase_complex::AR_coactivator_complex::17S_U2_snRNP::SF3A1-SF3A2-SF3A3_complex::SF3b_complex::Exon_junction_complex::SRm160/30…	0.042	245	C complex spliceosome	0.0893	80	0.516667	RNA binding: 7.24e-11	nucleotide binding: 9.801e-10	RNA helicase activity: 4.012e-05	protein binding: 0.0001148	single-stranded RNA binding: 0.0004174	nucleic acid binding: 0.002469	ATP-dependent helicase activity: 0.003389	pre-mRNA binding: 0.007417	RS domain binding: 0.007417	AU-rich element binding: 0.01275	C2H2 zinc finger domain binding: 0.01341	poly(A) RNA binding: 0.01704	core promoter binding: 0.01835	enzyme binding: 0.02674	estrogen receptor binding: 0.0268	ATP-dependent RNA helicase activity: 0.02745	RNA polymerase II core promoter proximal region sequence-specific DNA binding: 0.04267	calcium-dependent protein binding: 0.04454	chromatin binding: 0.04478	androgen receptor binding: 0.05286	transcription cofactor activity: 0.06044	single-stranded DNA binding: 0.07025	RNA polymerase II core promoter proximal region sequence-specific DNA binding transcription factor activity involved in positive regulation of transcription: 0.07668	mRNA binding: 0.08699	lipid binding: 0.09982
1698	14	Q15233, P02545, Q01081, O75533, P18583, Q07955, Q13243, O43390, P26368, P09661, P23246, Q15459, P52272, Q9UMS4,	0	0	0	0	(E.F.G)_complex::12S_U11_snRNP::6S_methyltransferase_and_RG-containing_Sm_proteins_complex::20S_methylosome-SmD_complex::20S_methylosome_and_RG-containing_Sm_protein_complex::6S_methyltransferase_complex::JBP1-pICln_complex::SMN_complex,_U7_snRNA_specific::20S_methyltransferase_complex::AR_coactivator_complex::17S_U2_snRNP::SF3A1-SF3A2-SF3A3_complex::SF3b_complex::Exon_junction_complex::SRm160/30…	0.042	245	PSF-p54(nrb) complex	0.1429	2	0.553571	RNA binding: 1.368e-12	RS domain binding: 6.041e-11	nucleotide binding: 9.801e-10	protein binding: 6.026e-06	nucleic acid binding: 0.002469	ubiquitin-ubiquitin ligase activity: 0.00842	C2H2 zinc finger domain binding: 0.01341	DNA binding: 0.06272	identical protein binding: 0.0757
269	14	Q15233, P02545, Q01081, O75533, P18583, P62314, Q07955, P26368, P09661, P23246, Q15459, P17844, P52272, Q9UMS4,	0	0	0	0	(E.F.G)_complex::12S_U11_snRNP::6S_methyltransferase_and_RG-containing_Sm_proteins_complex::20S_methylosome-SmD_complex::20S_methylosome_and_RG-containing_Sm_protein_complex::6S_methyltransferase_complex::JBP1-pICln_complex::SMN_complex,_U7_snRNA_specific::20S_methyltransferase_complex::AR_coactivator_complex::17S_U2_snRNP::SF3A1-SF3A2-SF3A3_complex::SF3b_complex::Exon_junction_complex::SRm160/30…	0.042	245	snRNP-free U1A (SF-A) complex	0.1607	4	0.454545	RNA binding: 7.24e-11	RS domain binding: 4.766e-08	nucleotide binding: 1.18e-06	protein binding: 6.026e-06	pre-mRNA binding: 0.007417	ubiquitin-ubiquitin ligase activity: 0.00842	RNA helicase activity: 0.009421	C2H2 zinc finger domain binding: 0.01341	nucleic acid binding: 0.01505	enzyme binding: 0.02674	estrogen receptor binding: 0.0268	ATP-dependent RNA helicase activity: 0.02745	calcium-dependent protein binding: 0.04454	androgen receptor binding: 0.05286	transcription cofactor activity: 0.06044	DNA binding: 0.06272	identical protein binding: 0.0757	ATP-dependent helicase activity: 0.08187
137	18	Q00839, P26368, Q16181, Q9BV38, P55769, O94906, Q07955, Q13243, P04004, Q99459, O43290, P09661, Q01081, P06702, O00422, Q92542, Q13123, Q16629,	0	0	0	0	(E.F.G)_complex::12S_U11_snRNP::6S_methyltransferase_and_RG-containing_Sm_proteins_complex::20S_methylosome-SmD_complex::20S_methylosome_and_RG-containing_Sm_protein_complex::6S_methyltransferase_complex::JBP1-pICln_complex::SMN_complex,_U7_snRNA_specific::20S_methyltransferase_complex::AR_coactivator_complex::17S_U2_snRNP::SF3A1-SF3A2-SF3A3_complex::SF3b_complex::Exon_junction_complex::SRm160/30…	0.0383	245	Spliceosome	0.047	143	0.67	RNA binding: 2.585e-09	RS domain binding: 1.067e-07	protein binding: 1.941e-07	nucleotide binding: 0.0001041	WD40-repeat domain binding: 0.001308	Toll-like receptor 4 binding: 0.003047	RAGE receptor binding: 0.006076	arachidonic acid binding: 0.007799	polysaccharide binding: 0.01251	snoRNA binding: 0.01293	C2H2 zinc finger domain binding: 0.01717	antioxidant activity: 0.01886	ribonucleoprotein complex binding: 0.02555	extracellular matrix binding: 0.02596	scavenger receptor activity: 0.05651	endopeptidase activity: 0.05806	androgen receptor binding: 0.0669
368	13	Q9P032, O60506, P38159, Q07955, O43143, Q15459, Q13151, P61978, P52597, O43390, P26368, P17844, P52272,	0.25	0	1	275	(E.F.G)_complex::12S_U11_snRNP::6S_methyltransferase_and_RG-containing_Sm_proteins_complex::20S_methylosome-SmD_complex::20S_methylosome_and_RG-containing_Sm_protein_complex::6S_methyltransferase_complex::JBP1-pICln_complex::SMN_complex,_U7_snRNA_specific::20S_methyltransferase_complex::AR_coactivator_complex::17S_U2_snRNP::SF3A1-SF3A2-SF3A3_complex::SF3b_complex::Exon_junction_complex::SRm160/30…	0.038	245	C complex spliceosome	0.0779	80	0.442308	RNA binding: 2.176e-11	nucleotide binding: 4.321e-10	RNA helicase activity: 3.441e-05	protein binding: 0.0002515	single-stranded RNA binding: 0.0003586	nucleic acid binding: 0.001718	ATP-dependent helicase activity: 0.002923	pre-mRNA binding: 0.00689	RS domain binding: 0.00689	calmodulin binding: 0.01084	AU-rich element binding: 0.01185	C2H2 zinc finger domain binding: 0.01246	poly(A) RNA binding: 0.01584	core promoter binding: 0.01706	enzyme binding: 0.02337	estrogen receptor binding: 0.02494	ATP-dependent RNA helicase activity: 0.02554	RNA polymerase II core promoter proximal region sequence-specific DNA binding: 0.03975	calcium-dependent protein binding: 0.04149	androgen receptor binding: 0.04928	transcription cofactor activity: 0.05638	single-stranded DNA binding: 0.06559	RNA polymerase II core promoter proximal region sequence-specific DNA binding transcription factor activity involved in positive regulation of transcription: 0.07162	mRNA binding: 0.08133
268	16	Q15459, Q07955, Q01081, O75533, P18583, O43395, P18754, Q6P2Q9, P62316, O43290, O94906, Q9UMS4, P09661, P52272, Q96PK6, P62826,	0	0	0	0	(E.F.G)_complex::12S_U11_snRNP::6S_methyltransferase_and_RG-containing_Sm_proteins_complex::20S_methylosome-SmD_complex::20S_methylosome_and_RG-containing_Sm_protein_complex::6S_methyltransferase_complex::JBP1-pICln_complex::SMN_complex,_U7_snRNA_specific::20S_methyltransferase_complex::AR_coactivator_complex::17S_U2_snRNP::SF3A1-SF3A2-SF3A3_complex::SF3b_complex::Exon_junction_complex::SRm160/30…	0.0367	245	C complex spliceosome	0.0945	80	0.653333	RNA binding: 1.438e-08	RS domain binding: 7.326e-08	protein binding: 1.082e-06	nucleotide binding: 0.0008098	U5 snRNA binding: 0.00155	androgen receptor binding: 0.001784	chromatin binding: 0.006965	ubiquitin-ubiquitin ligase activity: 0.009612	nucleosomal DNA binding: 0.009992	U6 snRNA binding: 0.01037	Ran guanyl-nucleotide exchange factor activity: 0.01227	ribonucleoprotein complex binding: 0.02278	transcription coactivator activity: 0.02535	RNA polymerase II transcription cofactor activity: 0.03993	ligand-dependent nuclear receptor transcription coactivator activity: 0.04314	protein binding bridging: 0.05371	histone binding: 0.06845	nucleic acid binding: 0.08768	identical protein binding: 0.09278
483	14	P31943, O14979, P38159, P51991, Q13151, P61978, P52597, O43390, P09651, P14866, P22626, Q14103, P52272, P26599,	0	0	0	0	(E.F.G)_complex::12S_U11_snRNP::6S_methyltransferase_and_RG-containing_Sm_proteins_complex::20S_methylosome-SmD_complex::20S_methylosome_and_RG-containing_Sm_protein_complex::6S_methyltransferase_complex::JBP1-pICln_complex::SMN_complex,_U7_snRNA_specific::20S_methyltransferase_complex::AR_coactivator_complex::17S_U2_snRNP::SF3A1-SF3A2-SF3A3_complex::SF3b_complex::Exon_junction_complex::SRm160/30…	0.0353	245	DCS complex (PTBP1, PTBP2, HNRPH1, HNRPF)	0.1607	4	0.431034	nucleotide binding: 8.952e-20	RNA binding: 5.255e-19	single-stranded RNA binding: 3.571e-06	nucleic acid binding: 2.844e-05	single-stranded DNA binding: 5.278e-05	single-stranded telomeric DNA binding: 0.001356	poly(G) RNA binding: 0.002033	pre-mRNA intronic binding: 0.002709	poly-pyrimidine tract binding: 0.004058	protein binding: 0.005518	pre-mRNA binding: 0.007417	AU-rich element binding: 0.01275	telomeric DNA binding: 0.01506	poly(U) RNA binding: 0.01572	poly(A) RNA binding: 0.01704	core promoter binding: 0.01835	RNA polymerase II core promoter proximal region sequence-specific DNA binding: 0.04267	RNA polymerase II core promoter proximal region sequence-specific DNA binding transcription factor activity involved in positive regulation of transcription: 0.07668	mRNA binding: 0.08699	double-stranded DNA binding: 0.09706
1646	14	P31943, P31942, P26368, P38159, Q07955, O75533, Q15459, Q13151, O14979, P52597, O43390, P61978, Q96PK6, P52272,	0	0	0	0	(E.F.G)_complex::12S_U11_snRNP::6S_methyltransferase_and_RG-containing_Sm_proteins_complex::20S_methylosome-SmD_complex::20S_methylosome_and_RG-containing_Sm_protein_complex::6S_methyltransferase_complex::JBP1-pICln_complex::SMN_complex,_U7_snRNA_specific::20S_methyltransferase_complex::AR_coactivator_complex::17S_U2_snRNP::SF3A1-SF3A2-SF3A3_complex::SF3b_complex::Exon_junction_complex::SRm160/30…	0.0353	245	HNRPF-HNRPH1 complex	0.1429	2	0.508197	RNA binding: 1.418e-16	nucleotide binding: 2.826e-15	nucleic acid binding: 0.0003037	single-stranded RNA binding: 0.0004174	poly(G) RNA binding: 0.002033	single-stranded DNA binding: 0.00246	protein binding: 0.005518	RS domain binding: 0.007417	AU-rich element binding: 0.01275	C2H2 zinc finger domain binding: 0.01341	poly(U) RNA binding: 0.01572	poly(A) RNA binding: 0.01704	core promoter binding: 0.01835	RNA polymerase II transcription cofactor activity: 0.03512	ligand-dependent nuclear receptor transcription coactivator activity: 0.03796	RNA polymerase II core promoter proximal region sequence-specific DNA binding: 0.04267	chromatin binding: 0.04478	protein binding bridging: 0.04733	RNA polymerase II core promoter proximal region sequence-specific DNA binding transcription factor activity involved in positive regulation of transcription: 0.07668	mRNA binding: 0.08699	double-stranded DNA binding: 0.09706
172	14	Q00839, P26368, O00422, P55769, Q13243, P12270, Q01081, O95232, O43290, P09661, Q15019, P06702, O94906, Q16629,	0	0	0	0	(E.F.G)_complex::12S_U11_snRNP::6S_methyltransferase_and_RG-containing_Sm_proteins_complex::20S_methylosome-SmD_complex::20S_methylosome_and_RG-containing_Sm_protein_complex::6S_methyltransferase_complex::JBP1-pICln_complex::SMN_complex,_U7_snRNA_specific::20S_methyltransferase_complex::AR_coactivator_complex::17S_U2_snRNP::SF3A1-SF3A2-SF3A3_complex::SF3b_complex::Exon_junction_complex::SRm160/30…	0.0353	245	Spliceosome	0.0405	143	0.787879	RNA binding: 8.034e-08	protein binding: 6.026e-06	RS domain binding: 2.456e-05	nucleotide binding: 0.0004715	Toll-like receptor 4 binding: 0.002371	dynein complex binding: 0.003721	protein anchor: 0.003721	mRNA binding: 0.003851	serine-tRNA ligase activity: 0.004058	RAGE receptor binding: 0.004732	arachidonic acid binding: 0.006076	snoRNA binding: 0.01009	mitogen-activated protein kinase binding: 0.01241	C2H2 zinc finger domain binding: 0.01341	nucleocytoplasmic transporter activity: 0.01407	antioxidant activity: 0.01473	enzyme regulator activity: 0.01638	ribonucleoprotein complex binding: 0.01999	heat shock protein binding: 0.02162	protein complex scaffold: 0.03194	tubulin binding: 0.04671	androgen receptor binding: 0.05286
248	17	Q00839, P26368, Q15019, Q92542, O00422, P55769, Q05519, P12270, Q01081, Q13243, Q2TAY7, O43290, O94906, P06702, Q13641, Q13123, Q16629,	0	0	0	0	(E.F.G)_complex::12S_U11_snRNP::6S_methyltransferase_and_RG-containing_Sm_proteins_complex::20S_methylosome-SmD_complex::20S_methylosome_and_RG-containing_Sm_protein_complex::6S_methyltransferase_complex::JBP1-pICln_complex::SMN_complex,_U7_snRNA_specific::20S_methyltransferase_complex::AR_coactivator_complex::17S_U2_snRNP::SF3A1-SF3A2-SF3A3_complex::SF3b_complex::Exon_junction_complex::SRm160/30…	0.0346	245	Spliceosome	0.0411	143	0.678161	RNA binding: 5.586e-07	protein binding: 1.06e-05	RS domain binding: 3.665e-05	nucleotide binding: 7.732e-05	Toll-like receptor 4 binding: 0.002878	dynein complex binding: 0.004515	protein anchor: 0.004515	serine-tRNA ligase activity: 0.004924	RAGE receptor binding: 0.00574	arachidonic acid binding: 0.007369	snoRNA binding: 0.01222	mitogen-activated protein kinase binding: 0.01504	C2H2 zinc finger domain binding: 0.01624	nucleocytoplasmic transporter activity: 0.01703	antioxidant activity: 0.01783	enzyme regulator activity: 0.01982	ribonucleoprotein complex binding: 0.02416	heat shock protein binding: 0.02613	protein complex scaffold: 0.03851	endopeptidase activity: 0.05503	tubulin binding: 0.05613	androgen receptor binding: 0.06343	nucleic acid binding: 0.09839
526	12	Q00839, P26368, Q16181, O00422, P55769, O94906, Q01081, Q13243, O43290, Q9UNL2, P07910, Q16629,	0	0	0	0	(E.F.G)_complex::12S_U11_snRNP::6S_methyltransferase_and_RG-containing_Sm_proteins_complex::20S_methylosome-SmD_complex::20S_methylosome_and_RG-containing_Sm_protein_complex::6S_methyltransferase_complex::JBP1-pICln_complex::SMN_complex,_U7_snRNA_specific::20S_methyltransferase_complex::AR_coactivator_complex::17S_U2_snRNP::SF3A1-SF3A2-SF3A3_complex::SF3b_complex::Exon_junction_complex::SRm160/30…	0.034	245	GR-hnRNP U complex	0.0417	2	0.652174	RNA binding: 1.466e-08	nucleotide binding: 1.141e-05	RS domain binding: 1.783e-05	protein binding: 0.0005478	snoRNA binding: 0.008659	C2H2 zinc finger domain binding: 0.01151	ribonucleoprotein complex binding: 0.01718	androgen receptor binding: 0.04567	nucleic acid binding: 0.04722	identical protein binding: 0.05906	mRNA binding: 0.07559
44	12	P31943, P61978, O60506, Q07955, Q13151, O14979, P52597, O43390, P26368, P09651, P14866, P52272,	2.25	3	0	236.333	(E.F.G)_complex::12S_U11_snRNP::6S_methyltransferase_and_RG-containing_Sm_proteins_complex::20S_methylosome-SmD_complex::20S_methylosome_and_RG-containing_Sm_protein_complex::6S_methyltransferase_complex::JBP1-pICln_complex::SMN_complex,_U7_snRNA_specific::20S_methyltransferase_complex::AR_coactivator_complex::17S_U2_snRNP::SF3A1-SF3A2-SF3A3_complex::SF3b_complex::Exon_junction_complex::SRm160/30…	0.034	245	HNRPF-HNRPH1 complex	0.1667	2	0.387755	nucleotide binding: 9.86e-17	RNA binding: 2.16e-16	single-stranded DNA binding: 3.224e-05	poly(A) RNA binding: 9.772e-05	single-stranded RNA binding: 0.0003041	nucleic acid binding: 0.001144	poly(G) RNA binding: 0.001743	protein binding: 0.004098	RS domain binding: 0.006363	AU-rich element binding: 0.01094	C2H2 zinc finger domain binding: 0.01151	poly(U) RNA binding: 0.0135	RNA polymerase II core promoter proximal region sequence-specific DNA binding: 0.0368	RNA polymerase II core promoter proximal region sequence-specific DNA binding transcription factor activity involved in positive regulation of transcription: 0.06651	double-stranded DNA binding: 0.08448
450	12	P31943, P61978, P38159, Q07955, Q13151, O14979, P52597, O43390, Q9BUJ2, P26368, P52272, O75844,	0	0	0	0	(E.F.G)_complex::12S_U11_snRNP::6S_methyltransferase_and_RG-containing_Sm_proteins_complex::20S_methylosome-SmD_complex::20S_methylosome_and_RG-containing_Sm_protein_complex::6S_methyltransferase_complex::JBP1-pICln_complex::SMN_complex,_U7_snRNA_specific::20S_methyltransferase_complex::AR_coactivator_complex::17S_U2_snRNP::SF3A1-SF3A2-SF3A3_complex::SF3b_complex::Exon_junction_complex::SRm160/30…	0.034	245	HNRPF-HNRPH1 complex	0.1667	2	0.348837	RNA binding: 4.99e-14	nucleotide binding: 2.187e-12	single-stranded RNA binding: 0.0003041	nucleic acid binding: 0.001144	poly(G) RNA binding: 0.001743	single-stranded DNA binding: 0.001804	RS domain binding: 0.006363	metalloexopeptidase activity: 0.01094	AU-rich element binding: 0.01094	C2H2 zinc finger domain binding: 0.01151	poly(U) RNA binding: 0.0135	poly(A) RNA binding: 0.01464	core promoter binding: 0.01577	protein binding: 0.01857	enzyme binding: 0.02016	RNA polymerase II core promoter proximal region sequence-specific DNA binding: 0.0368	RNA polymerase II core promoter proximal region sequence-specific DNA binding transcription factor activity involved in positive regulation of transcription: 0.06651	metalloendopeptidase activity: 0.07308	mRNA binding: 0.07559	double-stranded DNA binding: 0.08448
193	10	Q9GZT3, P26368, O60506, Q07955, O75533, P61978, Q12906, O43390, P08621, P52272,	0	0	0	0	(E.F.G)_complex::12S_U11_snRNP::6S_methyltransferase_and_RG-containing_Sm_proteins_complex::20S_methylosome-SmD_complex::20S_methylosome_and_RG-containing_Sm_protein_complex::6S_methyltransferase_complex::JBP1-pICln_complex::SMN_complex,_U7_snRNA_specific::20S_methyltransferase_complex::AR_coactivator_complex::17S_U2_snRNP::SF3A1-SF3A2-SF3A3_complex::SF3b_complex::Exon_junction_complex::SRm160/30…	0.0331	245	ILF3-XPO5 complex	0.05	2	0.69697	RNA binding: 1.704e-11	nucleotide binding: 1.523e-09	protein binding: 0.002542	nucleic acid binding: 0.004329	RS domain binding: 0.005308	C2H2 zinc finger domain binding: 0.009614	poly(A) RNA binding: 0.01223	double-stranded RNA binding: 0.02349	RNA polymerase II core promoter proximal region sequence-specific DNA binding: 0.03086	single-stranded DNA binding: 0.05127	RNA polymerase II core promoter proximal region sequence-specific DNA binding transcription factor activity involved in positive regulation of transcription: 0.05608
45	13	P31943, P61978, P38159, Q13151, O14979, P52597, O43390, P09651, P14866, P22626, Q14103, P52272, P26599,	9	4	2	235.167	(E.F.G)_complex::12S_U11_snRNP::6S_methyltransferase_and_RG-containing_Sm_proteins_complex::20S_methylosome-SmD_complex::20S_methylosome_and_RG-containing_Sm_protein_complex::6S_methyltransferase_complex::JBP1-pICln_complex::SMN_complex,_U7_snRNA_specific::20S_methyltransferase_complex::AR_coactivator_complex::17S_U2_snRNP::SF3A1-SF3A2-SF3A3_complex::SF3b_complex::Exon_junction_complex::SRm160/30…	0.0314	245	DCS complex (PTBP1, PTBP2, HNRPH1, HNRPF)	0.1731	4	0.418182	nucleotide binding: 2.981e-18	RNA binding: 1.066e-17	single-stranded RNA binding: 2.811e-06	nucleic acid binding: 1.539e-05	single-stranded DNA binding: 4.169e-05	single-stranded telomeric DNA binding: 0.001259	poly(G) RNA binding: 0.001888	protein binding: 0.002052	pre-mRNA intronic binding: 0.002516	poly-pyrimidine tract binding: 0.003769	pre-mRNA binding: 0.00689	AU-rich element binding: 0.01185	telomeric DNA binding: 0.014	poly(U) RNA binding: 0.01461	poly(A) RNA binding: 0.01584	core promoter binding: 0.01706	RNA polymerase II core promoter proximal region sequence-specific DNA binding: 0.03975	RNA polymerase II core promoter proximal region sequence-specific DNA binding transcription factor activity involved in positive regulation of transcription: 0.07162	mRNA binding: 0.08133	double-stranded DNA binding: 0.09082
326	13	Q00839, Q86VM9, Q16181, O00422, P55769, Q01081, Q13243, Q15424, Q2TAY7, P26368, O43290, P07910, Q16629,	0	0	0	0	(E.F.G)_complex::12S_U11_snRNP::6S_methyltransferase_and_RG-containing_Sm_proteins_complex::20S_methylosome-SmD_complex::20S_methylosome_and_RG-containing_Sm_protein_complex::6S_methyltransferase_complex::JBP1-pICln_complex::SMN_complex,_U7_snRNA_specific::20S_methyltransferase_complex::AR_coactivator_complex::17S_U2_snRNP::SF3A1-SF3A2-SF3A3_complex::SF3b_complex::Exon_junction_complex::SRm160/30…	0.0314	245	GR-hnRNP U complex	0.0385	2	0.52	RNA binding: 3.622e-08	nucleotide binding: 6.935e-07	RS domain binding: 2.106e-05	protein binding: 0.0002515	snoRNA binding: 0.009374	nucleic acid binding: 0.01163	C2H2 zinc finger domain binding: 0.01246	core promoter binding: 0.01706	identical protein binding: 0.0673	mRNA binding: 0.08133	double-stranded DNA binding: 0.09082
78	13	P31943, P31942, P26368, O60506, Q07955, P09651, O14979, P52597, O43390, P61978, P14866, P52272, Q13151,	0	0	0	0	(E.F.G)_complex::12S_U11_snRNP::6S_methyltransferase_and_RG-containing_Sm_proteins_complex::20S_methylosome-SmD_complex::20S_methylosome_and_RG-containing_Sm_protein_complex::6S_methyltransferase_complex::JBP1-pICln_complex::SMN_complex,_U7_snRNA_specific::20S_methyltransferase_complex::AR_coactivator_complex::17S_U2_snRNP::SF3A1-SF3A2-SF3A3_complex::SF3b_complex::Exon_junction_complex::SRm160/30…	0.0314	245	HNRPF-HNRPH1 complex	0.1538	2	0.363636	nucleotide binding: 2.981e-18	RNA binding: 1.066e-17	single-stranded DNA binding: 4.169e-05	poly(A) RNA binding: 0.0001153	nucleic acid binding: 0.0001877	single-stranded RNA binding: 0.0003586	poly(G) RNA binding: 0.001888	RS domain binding: 0.00689	protein binding: 0.01023	AU-rich element binding: 0.01185	C2H2 zinc finger domain binding: 0.01246	poly(U) RNA binding: 0.01461	RNA polymerase II core promoter proximal region sequence-specific DNA binding: 0.03975	RNA polymerase II core promoter proximal region sequence-specific DNA binding transcription factor activity involved in positive regulation of transcription: 0.07162	double-stranded DNA binding: 0.09082
324	13	P31943, O14979, O60506, Q07955, Q13151, P61978, P52597, O43390, P26368, P09651, P14866, Q8TAT6, P52272,	1	2	0	249.5	(E.F.G)_complex::12S_U11_snRNP::6S_methyltransferase_and_RG-containing_Sm_proteins_complex::20S_methylosome-SmD_complex::20S_methylosome_and_RG-containing_Sm_protein_complex::6S_methyltransferase_complex::JBP1-pICln_complex::SMN_complex,_U7_snRNA_specific::20S_methyltransferase_complex::AR_coactivator_complex::17S_U2_snRNP::SF3A1-SF3A2-SF3A3_complex::SF3b_complex::Exon_junction_complex::SRm160/30…	0.0314	245	HNRPF-HNRPH1 complex	0.1538	2	0.392157	nucleotide binding: 6.23e-16	RNA binding: 2.669e-15	single-stranded DNA binding: 4.169e-05	poly(A) RNA binding: 0.0001153	single-stranded RNA binding: 0.0003586	nucleic acid binding: 0.001718	poly(G) RNA binding: 0.001888	protein binding: 0.002052	RS domain binding: 0.00689	AU-rich element binding: 0.01185	C2H2 zinc finger domain binding: 0.01246	poly(U) RNA binding: 0.01461	RNA polymerase II core promoter proximal region sequence-specific DNA binding: 0.03975	RNA polymerase II core promoter proximal region sequence-specific DNA binding transcription factor activity involved in positive regulation of transcription: 0.07162	double-stranded DNA binding: 0.09082
1714	14	Q15019, P26368, Q00839, P55769, O94906, P12270, Q01081, Q13243, O43290, Q9H2P0, P06702, O00422, Q13123, Q16629,	0	0	0	0	(E.F.G)_complex::12S_U11_snRNP::6S_methyltransferase_and_RG-containing_Sm_proteins_complex::20S_methylosome-SmD_complex::20S_methylosome_and_RG-containing_Sm_protein_complex::6S_methyltransferase_complex::JBP1-pICln_complex::SMN_complex,_U7_snRNA_specific::20S_methyltransferase_complex::AR_coactivator_complex::17S_U2_snRNP::SF3A1-SF3A2-SF3A3_complex::SF3b_complex::Exon_junction_complex::SRm160/30…	0.0292	245	GR-hnRNP U complex	0.0357	2	0.796875	RNA binding: 1.764e-06	protein binding: 6.026e-06	RS domain binding: 2.456e-05	nucleotide binding: 0.0004715	Toll-like receptor 4 binding: 0.002371	dynein complex binding: 0.003721	protein anchor: 0.003721	serine-tRNA ligase activity: 0.004058	RAGE receptor binding: 0.004732	arachidonic acid binding: 0.006076	snoRNA binding: 0.01009	mitogen-activated protein kinase binding: 0.01241	C2H2 zinc finger domain binding: 0.01341	nucleocytoplasmic transporter activity: 0.01407	antioxidant activity: 0.01473	enzyme regulator activity: 0.01638	ribonucleoprotein complex binding: 0.01999	heat shock protein binding: 0.02162	protein complex scaffold: 0.03194	chromatin binding: 0.04478	tubulin binding: 0.04671	androgen receptor binding: 0.05286	mRNA binding: 0.08699
360	6	P62312, Q9UK45, P62310, Q9Y333, O60231, Q9Y4Z0,	0.25	0	1	2	(E.F.G)_complex::12S_U11_snRNP::6S_methyltransferase_and_RG-containing_Sm_proteins_complex::20S_methylosome-SmD_complex::20S_methylosome_and_RG-containing_Sm_protein_complex::6S_methyltransferase_complex::JBP1-pICln_complex::SMN_complex,_U7_snRNA_specific::20S_methyltransferase_complex::AR_coactivator_complex::17S_U2_snRNP::SF3A1-SF3A2-SF3A3_complex::SF3b_complex::Exon_junction_complex::SRm160/30…	0.0245	245	LSm2-8 complex	0.5952	7	0	U6 snRNA binding: 6.172e-06	RNA binding: 0.002095	RNA helicase activity: 0.004059	protein binding: 0.005797	ATP-dependent helicase activity: 0.03691
477	6	P62312, Q9UK45, P62310, Q9Y4Y9, Q9Y333, Q9Y4Z0,	0	0	0	0	(E.F.G)_complex::12S_U11_snRNP::6S_methyltransferase_and_RG-containing_Sm_proteins_complex::20S_methylosome-SmD_complex::20S_methylosome_and_RG-containing_Sm_protein_complex::6S_methyltransferase_complex::JBP1-pICln_complex::SMN_complex,_U7_snRNA_specific::20S_methyltransferase_complex::AR_coactivator_complex::17S_U2_snRNP::SF3A1-SF3A2-SF3A3_complex::SF3b_complex::Exon_junction_complex::SRm160/30…	0.0245	245	LSm2-8 complex	0.8571	7	0	U6 snRNA binding: 6.172e-06	RNA binding: 8.191e-05	protein binding: 0.005797
190	11	P26368, O60506, Q07955, Q13151, O14979, Q15434, P61978, O43390, P84103, Q15056, P52272,	0	0	0	0	(E.F.G)_complex::12S_U11_snRNP::6S_methyltransferase_and_RG-containing_Sm_proteins_complex::20S_methylosome-SmD_complex::20S_methylosome_and_RG-containing_Sm_protein_complex::6S_methyltransferase_complex::JBP1-pICln_complex::SMN_complex,_U7_snRNA_specific::20S_methyltransferase_complex::AR_coactivator_complex::17S_U2_snRNP::SF3A1-SF3A2-SF3A3_complex::SF3b_complex::Exon_junction_complex::SRm160/30…	0.0237	245	C complex spliceosome	0.0284	80	0.333333	nucleotide binding: 3.236e-15	RNA binding: 4.375e-15	poly(A) RNA binding: 8.153e-05	single-stranded DNA binding: 0.001511	poly(G) RNA binding: 0.001598	RS domain binding: 0.005836	AU-rich element binding: 0.01004	C2H2 zinc finger domain binding: 0.01056	phospholipase binding: 0.01213	translation factor activity nucleic acid binding: 0.03033	protein binding: 0.03287	RNA polymerase II core promoter proximal region sequence-specific DNA binding: 0.03384	nucleic acid binding: 0.03832	translation initiation factor activity: 0.05872	RNA polymerase II core promoter proximal region sequence-specific DNA binding transcription factor activity involved in positive regulation of transcription: 0.06133	double-stranded DNA binding: 0.07804
381	9	Q8TBF4, Q8WU90, Q96J01, Q8NI27, Q86W42, Q13769, Q96FV9, Q6I9Y2, P46939,	0.25	0	1	3	(E.F.G)_complex::12S_U11_snRNP::6S_methyltransferase_and_RG-containing_Sm_proteins_complex::20S_methylosome-SmD_complex::20S_methylosome_and_RG-containing_Sm_protein_complex::6S_methyltransferase_complex::JBP1-pICln_complex::SMN_complex,_U7_snRNA_specific::20S_methyltransferase_complex::AR_coactivator_complex::17S_U2_snRNP::SF3A1-SF3A2-SF3A3_complex::SF3b_complex::Exon_junction_complex::SRm160/30…	0.0222	245	THO complex	0.5556	5	0.8	RNA binding: 2.385e-08	vinculin binding: 0.01888	integrin binding: 0.05707	protein binding: 0.09316
1671	9	Q8WU90, Q6NZY4, Q96J01, Q8NI27, Q86W42, Q13769, Q96FV9, Q6I9Y2, P46939,	0	0	0	0	(E.F.G)_complex::12S_U11_snRNP::6S_methyltransferase_and_RG-containing_Sm_proteins_complex::20S_methylosome-SmD_complex::20S_methylosome_and_RG-containing_Sm_protein_complex::6S_methyltransferase_complex::JBP1-pICln_complex::SMN_complex,_U7_snRNA_specific::20S_methyltransferase_complex::AR_coactivator_complex::17S_U2_snRNP::SF3A1-SF3A2-SF3A3_complex::SF3b_complex::Exon_junction_complex::SRm160/30…	0.0222	245	THO complex	0.5556	5	0.8	RNA binding: 1.069e-06	vinculin binding: 0.01888	protein binding: 0.02937	integrin binding: 0.05707
538	12	Q00839, P26368, O00422, P55769, P12270, Q01081, O95232, O43290, Q15019, P06702, Q12857, Q16629,	0	0	0	0	(E.F.G)_complex::12S_U11_snRNP::6S_methyltransferase_and_RG-containing_Sm_proteins_complex::20S_methylosome-SmD_complex::20S_methylosome_and_RG-containing_Sm_protein_complex::6S_methyltransferase_complex::JBP1-pICln_complex::SMN_complex,_U7_snRNA_specific::20S_methyltransferase_complex::AR_coactivator_complex::17S_U2_snRNP::SF3A1-SF3A2-SF3A3_complex::SF3b_complex::Exon_junction_complex::SRm160/30…	0.0218	245	GR-hnRNP U complex	0.0417	2	0.777778	RNA binding: 0.0001662	protein binding: 0.0005478	Toll-like receptor 4 binding: 0.002033	mRNA binding: 0.002831	dynein complex binding: 0.003191	protein anchor: 0.003191	serine-tRNA ligase activity: 0.00348	nucleotide binding: 0.003794	RAGE receptor binding: 0.004058	arachidonic acid binding: 0.005212	RS domain binding: 0.006363	snoRNA binding: 0.008659	mitogen-activated protein kinase binding: 0.01066	C2H2 zinc finger domain binding: 0.01151	nucleocytoplasmic transporter activity: 0.01208	antioxidant activity: 0.01265	enzyme regulator activity: 0.01407	heat shock protein binding: 0.01859	protein complex scaffold: 0.0275	tubulin binding: 0.04032
1743	12	Q00839, P26368, O00422, P12270, Q01081, O95232, O43290, P09661, Q15019, P06702, Q12857, Q16629,	0	0	0	0	(E.F.G)_complex::12S_U11_snRNP::6S_methyltransferase_and_RG-containing_Sm_proteins_complex::20S_methylosome-SmD_complex::20S_methylosome_and_RG-containing_Sm_protein_complex::6S_methyltransferase_complex::JBP1-pICln_complex::SMN_complex,_U7_snRNA_specific::20S_methyltransferase_complex::AR_coactivator_complex::17S_U2_snRNP::SF3A1-SF3A2-SF3A3_complex::SF3b_complex::Exon_junction_complex::SRm160/30…	0.0218	245	GR-hnRNP U complex	0.0417	2	0.822222	RNA binding: 0.0001662	protein binding: 0.0005478	Toll-like receptor 4 binding: 0.002033	mRNA binding: 0.002831	dynein complex binding: 0.003191	protein anchor: 0.003191	serine-tRNA ligase activity: 0.00348	nucleotide binding: 0.003794	RAGE receptor binding: 0.004058	arachidonic acid binding: 0.005212	RS domain binding: 0.006363	mitogen-activated protein kinase binding: 0.01066	C2H2 zinc finger domain binding: 0.01151	nucleocytoplasmic transporter activity: 0.01208	antioxidant activity: 0.01265	enzyme regulator activity: 0.01407	heat shock protein binding: 0.01859	protein complex scaffold: 0.0275	tubulin binding: 0.04032
373	12	P31943, P55795, P38159, Q13151, O14979, P52597, O43390, P09651, P14866, Q9UKM9, Q14103, P52272,	0	0	0	0	(E.F.G)_complex::12S_U11_snRNP::6S_methyltransferase_and_RG-containing_Sm_proteins_complex::20S_methylosome-SmD_complex::20S_methylosome_and_RG-containing_Sm_protein_complex::6S_methyltransferase_complex::JBP1-pICln_complex::SMN_complex,_U7_snRNA_specific::20S_methyltransferase_complex::AR_coactivator_complex::17S_U2_snRNP::SF3A1-SF3A2-SF3A3_complex::SF3b_complex::Exon_junction_complex::SRm160/30…	0.0218	245	HNRPF-HNRPH1 complex	0.1667	2	0.227273	nucleotide binding: 2.359e-19	RNA binding: 2.16e-16	single-stranded RNA binding: 2.167e-06	nucleic acid binding: 7.683e-06	poly(G) RNA binding: 0.001743	single-stranded DNA binding: 0.001804	AU-rich element binding: 0.01094	telomeric DNA binding: 0.01294	poly(U) RNA binding: 0.0135	poly(A) RNA binding: 0.01464	core promoter binding: 0.01577	protein binding: 0.05682	mRNA binding: 0.07559	double-stranded DNA binding: 0.08448
504	6	P62312, Q9UK45, P62310, Q9Y333, Q9Y4Z0, Q5JSH3,	10816	114	94	2.9038	(E.F.G)_complex::12S_U11_snRNP::6S_methyltransferase_and_RG-containing_Sm_proteins_complex::20S_methylosome-SmD_complex::20S_methylosome_and_RG-containing_Sm_protein_complex::6S_methyltransferase_complex::JBP1-pICln_complex::SMN_complex,_U7_snRNA_specific::20S_methyltransferase_complex::AR_coactivator_complex::17S_U2_snRNP::SF3A1-SF3A2-SF3A3_complex::SF3b_complex::Exon_junction_complex::SRm160/30…	0.017	245	LSm2-8 complex	0.5952	7	0	U6 snRNA binding: 6.172e-06	RNA binding: 0.002095	protein binding: 0.04729
314	4	O75533, Q07955, Q92616, P62995,	0	0	0	0	(E.F.G)_complex::12S_U11_snRNP::6S_methyltransferase_and_RG-containing_Sm_proteins_complex::20S_methylosome-SmD_complex::20S_methylosome_and_RG-containing_Sm_protein_complex::6S_methyltransferase_complex::JBP1-pICln_complex::SMN_complex,_U7_snRNA_specific::20S_methyltransferase_complex::AR_coactivator_complex::17S_U2_snRNP::SF3A1-SF3A2-SF3A3_complex::SF3b_complex::Exon_junction_complex::SRm160/30…	0.0163	245	CDC5L complex	0.075	30	0.4	RS domain binding: 0.00213	nucleotide binding: 0.004492	translation factor activity nucleic acid binding: 0.01125	mRNA binding: 0.0266	nucleic acid binding: 0.02949	chromatin binding: 0.09605
1695	4	O43172, O43395, Q86TB9, O15116,	0	0	0	0	(E.F.G)_complex::12S_U11_snRNP::6S_methyltransferase_and_RG-containing_Sm_proteins_complex::20S_methylosome-SmD_complex::20S_methylosome_and_RG-containing_Sm_protein_complex::6S_methyltransferase_complex::JBP1-pICln_complex::SMN_complex,_U7_snRNA_specific::20S_methyltransferase_complex::AR_coactivator_complex::17S_U2_snRNP::SF3A1-SF3A2-SF3A3_complex::SF3b_complex::Exon_junction_complex::SRm160/30…	0.0092	245	LSm1-7 complex	0.0357	7	0.666667	poly(G) RNA binding: 0.0005815	poly(U) RNA binding: 0.004542	RNA binding: 0.01334	protein binding: 0.03228
1188	2	P55081, O15042,	1640.25	39	42	2	(E.F.G)_complex::12S_U11_snRNP::6S_methyltransferase_and_RG-containing_Sm_proteins_complex::20S_methylosome-SmD_complex::20S_methylosome_and_RG-containing_Sm_protein_complex::6S_methyltransferase_complex::JBP1-pICln_complex::SMN_complex,_U7_snRNA_specific::20S_methyltransferase_complex::AR_coactivator_complex::17S_U2_snRNP::SF3A1-SF3A2-SF3A3_complex::SF3b_complex::Exon_junction_complex::SRm160/30…	0.0082	245	17S U2 snRNP	0.0152	33	1	nucleotide binding: 0.05475	molecular_function: 0.06358	RNA binding: 0.09431
580	2	Q14498, Q9BRR8,	0	0	0	0	(E.F.G)_complex::12S_U11_snRNP::6S_methyltransferase_and_RG-containing_Sm_proteins_complex::20S_methylosome-SmD_complex::20S_methylosome_and_RG-containing_Sm_protein_complex::6S_methyltransferase_complex::JBP1-pICln_complex::SMN_complex,_U7_snRNA_specific::20S_methyltransferase_complex::AR_coactivator_complex::17S_U2_snRNP::SF3A1-SF3A2-SF3A3_complex::SF3b_complex::Exon_junction_complex::SRm160/30…	0.0082	245	C complex spliceosome	0.0063	80	0	nucleic acid binding: 0.005754	nucleotide binding: 0.05475	RNA binding: 0.09431
1752	2	P42285, Q6UX04,	81	8	10	2.1111	(E.F.G)_complex::12S_U11_snRNP::6S_methyltransferase_and_RG-containing_Sm_proteins_complex::20S_methylosome-SmD_complex::20S_methylosome_and_RG-containing_Sm_protein_complex::6S_methyltransferase_complex::JBP1-pICln_complex::SMN_complex,_U7_snRNA_specific::20S_methyltransferase_complex::AR_coactivator_complex::17S_U2_snRNP::SF3A1-SF3A2-SF3A3_complex::SF3b_complex::Exon_junction_complex::SRm160/30…	0.0082	245	C complex spliceosome	0.025	80	0	hydrolase activity acting on acid anhydrides in phosphorus-containing anhydrides: 0.001695	peptidyl-prolyl cis-trans isomerase activity: 0.006186	ATP-dependent helicase activity: 0.01262
1317	2	Q09161, P52298,	13456	115	117	2.9095	(E.F.G)_complex::12S_U11_snRNP::6S_methyltransferase_and_RG-containing_Sm_proteins_complex::20S_methylosome-SmD_complex::20S_methylosome_and_RG-containing_Sm_protein_complex::6S_methyltransferase_complex::JBP1-pICln_complex::SMN_complex,_U7_snRNA_specific::20S_methyltransferase_complex::AR_coactivator_complex::17S_U2_snRNP::SF3A1-SF3A2-SF3A3_complex::SF3b_complex::Exon_junction_complex::SRm160/30…	0.0082	245	CBC complex (cap binding complex)	1	2	0	RNA cap binding: 1.112e-06	RNA 7-methylguanosine cap binding: 0.0003393	RNA binding: 0.002461	nucleotide binding: 0.05475
1323	2	Q9P013, Q15427,	0	0	0	0	(E.F.G)_complex::12S_U11_snRNP::6S_methyltransferase_and_RG-containing_Sm_proteins_complex::20S_methylosome-SmD_complex::20S_methylosome_and_RG-containing_Sm_protein_complex::6S_methyltransferase_complex::JBP1-pICln_complex::SMN_complex,_U7_snRNA_specific::20S_methyltransferase_complex::AR_coactivator_complex::17S_U2_snRNP::SF3A1-SF3A2-SF3A3_complex::SF3b_complex::Exon_junction_complex::SRm160/30…	0.0082	245	CDC5L complex	0.0667	30	1	RNA binding: 0.002461	nucleotide binding: 0.05475
584	2	Q9BRP8, Q96GM8,	56.25	10	5	2.8	(E.F.G)_complex::12S_U11_snRNP::6S_methyltransferase_and_RG-containing_Sm_proteins_complex::20S_methylosome-SmD_complex::20S_methylosome_and_RG-containing_Sm_protein_complex::6S_methyltransferase_complex::JBP1-pICln_complex::SMN_complex,_U7_snRNA_specific::20S_methyltransferase_complex::AR_coactivator_complex::17S_U2_snRNP::SF3A1-SF3A2-SF3A3_complex::SF3b_complex::Exon_junction_complex::SRm160/30…	0.0082	245	Exon junction complex (F4A3-MLN51-UPF3B-MAGOH-Y14-PYM)	0.0833	6	1	ribosome binding: 0.004209	RNA binding: 0.09431
1164	2	O43172, Q8WYQ5,	0	0	0	0	(E.F.G)_complex::12S_U11_snRNP::6S_methyltransferase_and_RG-containing_Sm_proteins_complex::20S_methylosome-SmD_complex::20S_methylosome_and_RG-containing_Sm_protein_complex::6S_methyltransferase_complex::JBP1-pICln_complex::SMN_complex,_U7_snRNA_specific::20S_methyltransferase_complex::AR_coactivator_complex::17S_U2_snRNP::SF3A1-SF3A2-SF3A3_complex::SF3b_complex::Exon_junction_complex::SRm160/30…	0.0082	245	Microprocessor complex	0.25	2	0	double-stranded RNA binding: 0.004788
1207	2	Q7L014, Q12874,	0.25	0	1	2	(E.F.G)_complex::12S_U11_snRNP::6S_methyltransferase_and_RG-containing_Sm_proteins_complex::20S_methylosome-SmD_complex::20S_methylosome_and_RG-containing_Sm_protein_complex::6S_methyltransferase_complex::JBP1-pICln_complex::SMN_complex,_U7_snRNA_specific::20S_methyltransferase_complex::AR_coactivator_complex::17S_U2_snRNP::SF3A1-SF3A2-SF3A3_complex::SF3b_complex::Exon_junction_complex::SRm160/30…	0.0082	245	SF3A1-SF3A2-SF3A3 complex	0.1667	3	0	nucleic acid binding: 0.005754	ATP-dependent helicase activity: 0.01262	RNA binding: 0.09431
1321	2	Q9UNP9, Q15428,	0	0	0	0	(E.F.G)_complex::12S_U11_snRNP::6S_methyltransferase_and_RG-containing_Sm_proteins_complex::20S_methylosome-SmD_complex::20S_methylosome_and_RG-containing_Sm_protein_complex::6S_methyltransferase_complex::JBP1-pICln_complex::SMN_complex,_U7_snRNA_specific::20S_methyltransferase_complex::AR_coactivator_complex::17S_U2_snRNP::SF3A1-SF3A2-SF3A3_complex::SF3b_complex::Exon_junction_complex::SRm160/30…	0.0082	245	SF3A1-SF3A2-SF3A3 complex	0.1667	3	0	cyclosporin A binding: 0.001211	nucleic acid binding: 0.005754	peptidyl-prolyl cis-trans isomerase activity: 0.006186	nucleotide binding: 0.05475	RNA binding: 0.09431
1802	2	O00425, P17844,	1	2	0	2	(E.F.G)_complex::12S_U11_snRNP::6S_methyltransferase_and_RG-containing_Sm_proteins_complex::20S_methylosome-SmD_complex::20S_methylosome_and_RG-containing_Sm_protein_complex::6S_methyltransferase_complex::JBP1-pICln_complex::SMN_complex,_U7_snRNA_specific::20S_methyltransferase_complex::AR_coactivator_complex::17S_U2_snRNP::SF3A1-SF3A2-SF3A3_complex::SF3b_complex::Exon_junction_complex::SRm160/30…	0.0082	245	snRNP-free U1A (SF-A) complex	0.125	4	0	mRNA 5'-UTR binding: 0.0005331	translation regulator activity: 0.0008238	pre-mRNA binding: 0.001066	RNA helicase activity: 0.001357	estrogen receptor binding: 0.003919	ATP-dependent RNA helicase activity: 0.004016	mRNA 3'-UTR binding: 0.004547	nucleic acid binding: 0.005754	calcium-dependent protein binding: 0.00662	androgen receptor binding: 0.007919	transcription cofactor activity: 0.009121	ATP-dependent helicase activity: 0.01262	calmodulin binding: 0.02499	transcription coactivator activity: 0.03209	enzyme binding: 0.0378	nucleotide binding: 0.05475	RNA binding: 0.09431
1202	2	O43172, O43447,	0.25	0	1	5	(E.F.G)_complex::12S_U11_snRNP::6S_methyltransferase_and_RG-containing_Sm_proteins_complex::20S_methylosome-SmD_complex::20S_methylosome_and_RG-containing_Sm_protein_complex::6S_methyltransferase_complex::JBP1-pICln_complex::SMN_complex,_U7_snRNA_specific::20S_methyltransferase_complex::AR_coactivator_complex::17S_U2_snRNP::SF3A1-SF3A2-SF3A3_complex::SF3b_complex::Exon_junction_complex::SRm160/30…	0.0082	245	Spliceosome	0.014	143	0	cyclosporin A binding: 0.001211	ribonucleoprotein complex binding: 0.002905	peptidyl-prolyl cis-trans isomerase activity: 0.006186
1747	2	O43172, Q9NYV4,	0.25	0	1	3	(E.F.G)_complex::12S_U11_snRNP::6S_methyltransferase_and_RG-containing_Sm_proteins_complex::20S_methylosome-SmD_complex::20S_methylosome_and_RG-containing_Sm_protein_complex::6S_methyltransferase_complex::JBP1-pICln_complex::SMN_complex,_U7_snRNA_specific::20S_methyltransferase_complex::AR_coactivator_complex::17S_U2_snRNP::SF3A1-SF3A2-SF3A3_complex::SF3b_complex::Exon_junction_complex::SRm160/30…	0.0082	245	Spliceosome	0.014	143	1	cyclin binding: 0.002615	RNA polymerase II carboxy-terminal domain kinase activity: 0.002856	cyclin-dependent protein serine/threonine kinase activity: 0.005801	protein kinase activity: 0.05461	protein serine/threonine kinase activity: 0.06063
1639	2	O43143, P35659,	0.25	1	0	3	(E.F.G)_complex::12S_U11_snRNP::6S_methyltransferase_and_RG-containing_Sm_proteins_complex::20S_methylosome-SmD_complex::20S_methylosome_and_RG-containing_Sm_protein_complex::6S_methyltransferase_complex::JBP1-pICln_complex::SMN_complex,_U7_snRNA_specific::20S_methyltransferase_complex::AR_coactivator_complex::17S_U2_snRNP::SF3A1-SF3A2-SF3A3_complex::SF3b_complex::Exon_junction_complex::SRm160/30…	0.0082	245	Splicing-associated factors complex	0.1	5	1	RNA helicase activity: 0.001357	nucleic acid binding: 0.005754	histone binding: 0.009121	ATP-dependent helicase activity: 0.01262
571	2	Q9UQ35, Q8IYB3,	0	0	0	0	(E.F.G)_complex::12S_U11_snRNP::6S_methyltransferase_and_RG-containing_Sm_proteins_complex::20S_methylosome-SmD_complex::20S_methylosome_and_RG-containing_Sm_protein_complex::6S_methyltransferase_complex::JBP1-pICln_complex::SMN_complex,_U7_snRNA_specific::20S_methyltransferase_complex::AR_coactivator_complex::17S_U2_snRNP::SF3A1-SF3A2-SF3A3_complex::SF3b_complex::Exon_junction_complex::SRm160/30…	0.0082	245	SRm160-SRm300 complex	1	2	1	C2H2 zinc finger domain binding: 0.001937	RNA binding: 0.002461	protein N-terminus binding: 0.01506
932	2	Q96SB4, O43290,	0	0	0	0	(E.F.G)_complex::12S_U11_snRNP::6S_methyltransferase_and_RG-containing_Sm_proteins_complex::20S_methylosome-SmD_complex::20S_methylosome_and_RG-containing_Sm_protein_complex::6S_methyltransferase_complex::JBP1-pICln_complex::SMN_complex,_U7_snRNA_specific::20S_methyltransferase_complex::AR_coactivator_complex::17S_U2_snRNP::SF3A1-SF3A2-SF3A3_complex::SF3b_complex::Exon_junction_complex::SRm160/30…	0.0082	245	Toposome	0.0714	7	1	magnesium ion binding: 0.03026	protein kinase activity: 0.05461	protein serine/threonine kinase activity: 0.06063	molecular_function: 0.06358
1281	2	P67809, Q7RTV0,	0	0	0	0	(E.F.G)_complex::12S_U11_snRNP::6S_methyltransferase_and_RG-containing_Sm_proteins_complex::20S_methylosome-SmD_complex::20S_methylosome_and_RG-containing_Sm_protein_complex::6S_methyltransferase_complex::JBP1-pICln_complex::SMN_complex,_U7_snRNA_specific::20S_methyltransferase_complex::AR_coactivator_complex::17S_U2_snRNP::SF3A1-SF3A2-SF3A3_complex::SF3b_complex::Exon_junction_complex::SRm160/30…	0.0082	245	YBX1-AKT1 complex	0.25	2	1	sequence-specific DNA binding transcription factor activity: 0.004193	single-stranded DNA binding: 0.0107	double-stranded DNA binding: 0.0152	DNA binding: 0.01533	RNA binding: 0.09431
286	4	Q14315, P50552, Q12874, Q13242,	0	0	0	0	(E.F.G)_complex::12S_U11_snRNP::6S_methyltransferase_and_RG-containing_Sm_proteins_complex::20S_methylosome-SmD_complex::20S_methylosome_and_RG-containing_Sm_protein_complex::6S_methyltransferase_complex::JBP1-pICln_complex::SMN_complex,_U7_snRNA_specific::20S_methyltransferase_complex::AR_coactivator_complex::17S_U2_snRNP::SF3A1-SF3A2-SF3A3_complex::SF3b_complex::Exon_junction_complex::SRm160/30…	0.0041	245	RIAM-VASP complex	0.125	2	0.8	profilin binding: 0.003578	actin binding: 0.004197	ankyrin binding: 0.006561	cytoskeletal protein binding: 0.01996	nucleic acid binding: 0.02949	protein binding: 0.03228	SH3 domain binding: 0.03547
303	4	Q14315, Q12874, P29692, Q13242,	1	1	1	48.5	(E.F.G)_complex::12S_U11_snRNP::6S_methyltransferase_and_RG-containing_Sm_proteins_complex::20S_methylosome-SmD_complex::20S_methylosome_and_RG-containing_Sm_protein_complex::6S_methyltransferase_complex::JBP1-pICln_complex::SMN_complex,_U7_snRNA_specific::20S_methyltransferase_complex::AR_coactivator_complex::17S_U2_snRNP::SF3A1-SF3A2-SF3A3_complex::SF3b_complex::Exon_junction_complex::SRm160/30…	0.0041	245	SF3A1-SF3A2-SF3A3 complex	0.0833	3	0.8	ankyrin binding: 0.006561	translation elongation factor activity: 0.008	translation factor activity nucleic acid binding: 0.01125	cytoskeletal protein binding: 0.01996	nucleic acid binding: 0.02949	protein binding: 0.03228	signal transducer activity: 0.07039
297	4	O60568, P24534, P26641, P10809,	0	0	0	0	(E.F.G)_complex::12S_U11_snRNP::6S_methyltransferase_and_RG-containing_Sm_proteins_complex::20S_methylosome-SmD_complex::20S_methylosome_and_RG-containing_Sm_protein_complex::6S_methyltransferase_complex::JBP1-pICln_complex::SMN_complex,_U7_snRNA_specific::20S_methyltransferase_complex::AR_coactivator_complex::17S_U2_snRNP::SF3A1-SF3A2-SF3A3_complex::SF3b_complex::Exon_junction_complex::SRm160/30…	0.0041	245	SNW1 complex	0.0139	18	0.8	translation elongation factor activity: 2.39e-05	procollagen glucosyltransferase activity: 0.0002908	procollagen-lysine 5-dioxygenase activity: 0.0006784	procollagen galactosyltransferase activity: 0.0008721	DNA replication origin binding: 0.002226	lipopolysaccharide binding: 0.004445	L-ascorbic acid binding: 0.007041	chaperone binding: 0.01277	p53 binding: 0.01723	single-stranded DNA binding: 0.02118	unfolded protein binding: 0.03105	protein binding: 0.03228	iron ion binding: 0.03876	ATPase activity: 0.04104
300	4	Q9BWF3, Q92499, Q5VSL9, P68104,	0	0	0	0	(E.F.G)_complex::12S_U11_snRNP::6S_methyltransferase_and_RG-containing_Sm_proteins_complex::20S_methylosome-SmD_complex::20S_methylosome_and_RG-containing_Sm_protein_complex::6S_methyltransferase_complex::JBP1-pICln_complex::SMN_complex,_U7_snRNA_specific::20S_methyltransferase_complex::AR_coactivator_complex::17S_U2_snRNP::SF3A1-SF3A2-SF3A3_complex::SF3b_complex::Exon_junction_complex::SRm160/30…	0.0041	245	SNW1 complex	0.0139	18	0.4	DNA/RNA helicase activity: 9.696e-05	pre-mRNA intronic pyrimidine-rich binding: 0.0003877	pre-mRNA intronic binding: 0.0007753	RNA helicase activity: 0.002709	miRNA binding: 0.002903	poly(A) RNA binding: 0.004927	nuclease activity: 0.006849	exonuclease activity: 0.008	translation elongation factor activity: 0.008	mRNA 3'-UTR binding: 0.009053	double-stranded RNA binding: 0.009531	transcription cofactor activity: 0.01808	ATP-dependent helicase activity: 0.02492	mRNA binding: 0.0266	protein binding: 0.03228	GTPase activity: 0.0684	protein kinase binding: 0.09017	chromatin binding: 0.09605
438	5	Q9UHR5, Q14315, Q14204, P35637, Q14203,	0	0	0	0	(E.F.G)_complex::12S_U11_snRNP::6S_methyltransferase_and_RG-containing_Sm_proteins_complex::20S_methylosome-SmD_complex::20S_methylosome_and_RG-containing_Sm_protein_complex::6S_methyltransferase_complex::JBP1-pICln_complex::SMN_complex,_U7_snRNA_specific::20S_methyltransferase_complex::AR_coactivator_complex::17S_U2_snRNP::SF3A1-SF3A2-SF3A3_complex::SF3b_complex::Exon_junction_complex::SRm160/30…	0.0033	245	DGCR8 multiprotein complex	0.0182	11	0.875	dynein binding: 0.00483	ATPase activity coupled: 0.005791	ankyrin binding: 0.008188	protein binding: 0.01368	cytoskeletal protein binding: 0.02482	motor activity: 0.02715	microtubule motor activity: 0.02888
1092	2	P10809, Q9HCC0,	0	0	0	0	(E.F.G)_complex::12S_U11_snRNP::6S_methyltransferase_and_RG-containing_Sm_proteins_complex::20S_methylosome-SmD_complex::20S_methylosome_and_RG-containing_Sm_protein_complex::6S_methyltransferase_complex::JBP1-pICln_complex::SMN_complex,_U7_snRNA_specific::20S_methyltransferase_complex::AR_coactivator_complex::17S_U2_snRNP::SF3A1-SF3A2-SF3A3_complex::SF3b_complex::Exon_junction_complex::SRm160/30…	0.002	245	17S U2 snRNP	0.0152	33	1	methylcrotonoyl-CoA carboxylase activity: 0.0005331	DNA replication origin binding: 0.001114	lipopolysaccharide binding: 0.002228	chaperone binding: 0.006427	p53 binding: 0.008688	single-stranded DNA binding: 0.0107	ligase activity: 0.01329	ATP binding: 0.0148	unfolded protein binding: 0.01578	ATPase activity: 0.02096
614	2	O15155, Q9UKV3,	0	0	0	0	(E.F.G)_complex::12S_U11_snRNP::6S_methyltransferase_and_RG-containing_Sm_proteins_complex::20S_methylosome-SmD_complex::20S_methylosome_and_RG-containing_Sm_protein_complex::6S_methyltransferase_complex::JBP1-pICln_complex::SMN_complex,_U7_snRNA_specific::20S_methyltransferase_complex::AR_coactivator_complex::17S_U2_snRNP::SF3A1-SF3A2-SF3A3_complex::SF3b_complex::Exon_junction_complex::SRm160/30…	0.002	245	Apoptosis- and splicing-associated protein complex (ASAP-S), SAP18-RNPS1-Acinus-S	0.1667	3	1	ATPase activity: 0.02096	enzyme binding: 0.0378	nucleotide binding: 0.05475	RNA binding: 0.09431
862	2	Q04656, Q9UKV3,	0	0	0	0	(E.F.G)_complex::12S_U11_snRNP::6S_methyltransferase_and_RG-containing_Sm_proteins_complex::20S_methylosome-SmD_complex::20S_methylosome_and_RG-containing_Sm_protein_complex::6S_methyltransferase_complex::JBP1-pICln_complex::SMN_complex,_U7_snRNA_specific::20S_methyltransferase_complex::AR_coactivator_complex::17S_U2_snRNP::SF3A1-SF3A2-SF3A3_complex::SF3b_complex::Exon_junction_complex::SRm160/30…	0.002	245	Apoptosis- and splicing-associated protein complex (ASAP-S), SAP18-RNPS1-Acinus-S	0.1667	3	1	superoxide dismutase copper chaperone activity: 0.0002424	copper-dependent protein binding: 0.0002908	copper-exporting ATPase activity: 0.0003393	copper ion transmembrane transporter activity: 0.0008238	copper ion binding: 0.008496	ATPase activity: 0.02096	enzyme binding: 0.0378	nucleotide binding: 0.05475	RNA binding: 0.09431
867	2	A8MWD9, Q9UKV3,	0	0	0	0	(E.F.G)_complex::12S_U11_snRNP::6S_methyltransferase_and_RG-containing_Sm_proteins_complex::20S_methylosome-SmD_complex::20S_methylosome_and_RG-containing_Sm_protein_complex::6S_methyltransferase_complex::JBP1-pICln_complex::SMN_complex,_U7_snRNA_specific::20S_methyltransferase_complex::AR_coactivator_complex::17S_U2_snRNP::SF3A1-SF3A2-SF3A3_complex::SF3b_complex::Exon_junction_complex::SRm160/30…	0.002	245	Apoptosis- and splicing-associated protein complex (ASAP-S), SAP18-RNPS1-Acinus-S	0.1667	3	1	RNA binding: 0.002461	ATPase activity: 0.02096	enzyme binding: 0.0378	nucleotide binding: 0.05475
685	2	Q6NZY4, Q96RU2,	49	5	9	2	(E.F.G)_complex::12S_U11_snRNP::6S_methyltransferase_and_RG-containing_Sm_proteins_complex::20S_methylosome-SmD_complex::20S_methylosome_and_RG-containing_Sm_protein_complex::6S_methyltransferase_complex::JBP1-pICln_complex::SMN_complex,_U7_snRNA_specific::20S_methyltransferase_complex::AR_coactivator_complex::17S_U2_snRNP::SF3A1-SF3A2-SF3A3_complex::SF3b_complex::Exon_junction_complex::SRm160/30…	0.002	245	C complex spliceosome	0.0063	80	1	ubiquitin-specific protease activity: 0.009265	ubiquitin thiolesterase activity: 0.01224	cysteine-type peptidase activity: 0.0141
840	2	Q9NVP1, O94906,	0	0	0	0	(E.F.G)_complex::12S_U11_snRNP::6S_methyltransferase_and_RG-containing_Sm_proteins_complex::20S_methylosome-SmD_complex::20S_methylosome_and_RG-containing_Sm_protein_complex::6S_methyltransferase_complex::JBP1-pICln_complex::SMN_complex,_U7_snRNA_specific::20S_methyltransferase_complex::AR_coactivator_complex::17S_U2_snRNP::SF3A1-SF3A2-SF3A3_complex::SF3b_complex::Exon_junction_complex::SRm160/30…	0.002	245	C complex spliceosome	0.0063	80	0	RNA binding: 0.002461	ribonucleoprotein complex binding: 0.002905	ATP-dependent RNA helicase activity: 0.004016	androgen receptor binding: 0.007919	ATP-dependent helicase activity: 0.01262	transcription coactivator activity: 0.03209
877	2	O14530, Q6NZY4,	42.25	7	6	2	(E.F.G)_complex::12S_U11_snRNP::6S_methyltransferase_and_RG-containing_Sm_proteins_complex::20S_methylosome-SmD_complex::20S_methylosome_and_RG-containing_Sm_protein_complex::6S_methyltransferase_complex::JBP1-pICln_complex::SMN_complex,_U7_snRNA_specific::20S_methyltransferase_complex::AR_coactivator_complex::17S_U2_snRNP::SF3A1-SF3A2-SF3A3_complex::SF3b_complex::Exon_junction_complex::SRm160/30…	0.002	245	C complex spliceosome	0.0063	80	1
1246	2	Q14562, Q86TC9,	100	12	8	2.75	(E.F.G)_complex::12S_U11_snRNP::6S_methyltransferase_and_RG-containing_Sm_proteins_complex::20S_methylosome-SmD_complex::20S_methylosome_and_RG-containing_Sm_protein_complex::6S_methyltransferase_complex::JBP1-pICln_complex::SMN_complex,_U7_snRNA_specific::20S_methyltransferase_complex::AR_coactivator_complex::17S_U2_snRNP::SF3A1-SF3A2-SF3A3_complex::SF3b_complex::Exon_junction_complex::SRm160/30…	0.002	245	C complex spliceosome	0.0063	80	1	muscle alpha-actinin binding: 0.0007269	ATP-dependent RNA helicase activity: 0.004016	cytoskeletal protein binding: 0.01008	ATP-dependent helicase activity: 0.01262	SH3 domain binding: 0.01806	actin binding: 0.05292	identical protein binding: 0.06927	RNA binding: 0.09431
720	2	Q8TAD4, Q07955,	0.25	0	1	2	(E.F.G)_complex::12S_U11_snRNP::6S_methyltransferase_and_RG-containing_Sm_proteins_complex::20S_methylosome-SmD_complex::20S_methylosome_and_RG-containing_Sm_protein_complex::6S_methyltransferase_complex::JBP1-pICln_complex::SMN_complex,_U7_snRNA_specific::20S_methyltransferase_complex::AR_coactivator_complex::17S_U2_snRNP::SF3A1-SF3A2-SF3A3_complex::SF3b_complex::Exon_junction_complex::SRm160/30…	0.002	245	CDC5L complex	0.0167	30	0	RS domain binding: 0.001066	zinc ion transmembrane transporter activity: 0.002421	cation transmembrane transporter activity: 0.002905	nucleotide binding: 0.05475	RNA binding: 0.09431
764	2	Q32MZ4, Q14204,	729	24	30	2.8333	(E.F.G)_complex::12S_U11_snRNP::6S_methyltransferase_and_RG-containing_Sm_proteins_complex::20S_methylosome-SmD_complex::20S_methylosome_and_RG-containing_Sm_protein_complex::6S_methyltransferase_complex::JBP1-pICln_complex::SMN_complex,_U7_snRNA_specific::20S_methyltransferase_complex::AR_coactivator_complex::17S_U2_snRNP::SF3A1-SF3A2-SF3A3_complex::SF3b_complex::Exon_junction_complex::SRm160/30…	0.002	245	CDC5L complex	0.0167	30	1	ATPase activity coupled: 0.002324	double-stranded RNA binding: 0.004788	microtubule motor activity: 0.01176	protein homodimerization activity: 0.08226
893	2	P04899, Q07955,	0	0	0	0	(E.F.G)_complex::12S_U11_snRNP::6S_methyltransferase_and_RG-containing_Sm_proteins_complex::20S_methylosome-SmD_complex::20S_methylosome_and_RG-containing_Sm_protein_complex::6S_methyltransferase_complex::JBP1-pICln_complex::SMN_complex,_U7_snRNA_specific::20S_methyltransferase_complex::AR_coactivator_complex::17S_U2_snRNP::SF3A1-SF3A2-SF3A3_complex::SF3b_complex::Exon_junction_complex::SRm160/30…	0.002	245	CDC5L complex	0.0167	30	1	RS domain binding: 0.001066	guanyl nucleotide binding: 0.001163	G-protein coupled receptor binding: 0.003243	G-protein beta/gamma-subunit complex binding: 0.003436	GTPase activity: 0.03547	signal transducer activity: 0.03654	GTP binding: 0.05351	nucleotide binding: 0.05475	RNA binding: 0.09431
966	2	A1L0T0, Q07955,	625	31	19	2	(E.F.G)_complex::12S_U11_snRNP::6S_methyltransferase_and_RG-containing_Sm_proteins_complex::20S_methylosome-SmD_complex::20S_methylosome_and_RG-containing_Sm_protein_complex::6S_methyltransferase_complex::JBP1-pICln_complex::SMN_complex,_U7_snRNA_specific::20S_methyltransferase_complex::AR_coactivator_complex::17S_U2_snRNP::SF3A1-SF3A2-SF3A3_complex::SF3b_complex::Exon_junction_complex::SRm160/30…	0.002	245	CDC5L complex	0.0167	30	0	RS domain binding: 0.001066	thiamine pyrophosphate binding: 0.00126	transferase activity: 0.01195	magnesium ion binding: 0.03026	catalytic activity: 0.04231	nucleotide binding: 0.05475	molecular_function: 0.06358	RNA binding: 0.09431
997	2	P54725, Q01130,	0	0	0	0	(E.F.G)_complex::12S_U11_snRNP::6S_methyltransferase_and_RG-containing_Sm_proteins_complex::20S_methylosome-SmD_complex::20S_methylosome_and_RG-containing_Sm_protein_complex::6S_methyltransferase_complex::JBP1-pICln_complex::SMN_complex,_U7_snRNA_specific::20S_methyltransferase_complex::AR_coactivator_complex::17S_U2_snRNP::SF3A1-SF3A2-SF3A3_complex::SF3b_complex::Exon_junction_complex::SRm160/30…	0.002	245	CDC5L complex	0.0167	30	0	polyubiquitin binding: 0.003001	single-stranded DNA binding: 0.0107	damaged DNA binding: 0.01209	transcription corepressor activity: 0.02697	nucleotide binding: 0.05475	RNA binding: 0.09431
1082	2	Q8WZ42, Q01130,	0	0	0	0	(E.F.G)_complex::12S_U11_snRNP::6S_methyltransferase_and_RG-containing_Sm_proteins_complex::20S_methylosome-SmD_complex::20S_methylosome_and_RG-containing_Sm_protein_complex::6S_methyltransferase_complex::JBP1-pICln_complex::SMN_complex,_U7_snRNA_specific::20S_methyltransferase_complex::AR_coactivator_complex::17S_U2_snRNP::SF3A1-SF3A2-SF3A3_complex::SF3b_complex::Exon_junction_complex::SRm160/30…	0.002	245	CDC5L complex	0.0167	30	1	structural molecule activity conferring elasticity: 9.696e-05	telethonin binding: 0.0002424	muscle alpha-actinin binding: 0.0007269	actinin binding: 0.0007269	protein self-association: 0.004305	structural constituent of muscle: 0.007679	protease binding: 0.01037	actin filament binding: 0.01611	protein tyrosine kinase activity: 0.01716	calmodulin binding: 0.02499	transcription corepressor activity: 0.02697	enzyme binding: 0.0378	protein kinase binding: 0.04735	nucleotide binding: 0.05475	protein serine/threonine kinase activity: 0.06063	identical protein binding: 0.06927	calcium ion binding: 0.09204	RNA binding: 0.09431
1114	2	Q07955, Q9Y6M5,	0.25	1	0	2	(E.F.G)_complex::12S_U11_snRNP::6S_methyltransferase_and_RG-containing_Sm_proteins_complex::20S_methylosome-SmD_complex::20S_methylosome_and_RG-containing_Sm_protein_complex::6S_methyltransferase_complex::JBP1-pICln_complex::SMN_complex,_U7_snRNA_specific::20S_methyltransferase_complex::AR_coactivator_complex::17S_U2_snRNP::SF3A1-SF3A2-SF3A3_complex::SF3b_complex::Exon_junction_complex::SRm160/30…	0.002	245	CDC5L complex	0.0167	30	0	calcium channel inhibitor activity: 0.0009691	RS domain binding: 0.001066	zinc ion transmembrane transporter activity: 0.002421	nucleotide binding: 0.05475	RNA binding: 0.09431
1381	2	P31350, P38159,	0	0	0	0	(E.F.G)_complex::12S_U11_snRNP::6S_methyltransferase_and_RG-containing_Sm_proteins_complex::20S_methylosome-SmD_complex::20S_methylosome_and_RG-containing_Sm_protein_complex::6S_methyltransferase_complex::JBP1-pICln_complex::SMN_complex,_U7_snRNA_specific::20S_methyltransferase_complex::AR_coactivator_complex::17S_U2_snRNP::SF3A1-SF3A2-SF3A3_complex::SF3b_complex::Exon_junction_complex::SRm160/30…	0.002	245	CDC5L complex	0.0167	30	1	ribonucleoside-diphosphate reductase activity thioredoxin disulfide as acceptor: 0.0004847	core promoter binding: 0.002663	single-stranded RNA binding: 0.004354	mRNA binding: 0.01348	oxidoreductase activity: 0.02867	chromatin binding: 0.05062	nucleotide binding: 0.05475	RNA binding: 0.09431
1596	2	P36776, Q14204,	0	0	0	0	(E.F.G)_complex::12S_U11_snRNP::6S_methyltransferase_and_RG-containing_Sm_proteins_complex::20S_methylosome-SmD_complex::20S_methylosome_and_RG-containing_Sm_protein_complex::6S_methyltransferase_complex::JBP1-pICln_complex::SMN_complex,_U7_snRNA_specific::20S_methyltransferase_complex::AR_coactivator_complex::17S_U2_snRNP::SF3A1-SF3A2-SF3A3_complex::SF3b_complex::Exon_junction_complex::SRm160/30…	0.002	245	CDC5L complex	0.0167	30	0	mitochondrial light strand promoter anti-sense binding: 0.0004362	mitochondrial heavy strand promoter anti-sense binding: 0.0004362	mitochondrial heavy strand promoter sense binding: 0.0004362	mitochondrial light strand promoter sense binding: 0.0004847	DNA polymerase binding: 0.0005331	G-quadruplex DNA binding: 0.0005816	ATP-dependent peptidase activity: 0.001357	ATPase activity coupled: 0.002324	single-stranded RNA binding: 0.004354	ADP binding: 0.004643	single-stranded DNA binding: 0.0107	microtubule motor activity: 0.01176	ATP binding: 0.0148	serine-type endopeptidase activity: 0.02006	sequence-specific DNA binding: 0.06516
1032	2	O75934, O75962,	0	0	0	0	(E.F.G)_complex::12S_U11_snRNP::6S_methyltransferase_and_RG-containing_Sm_proteins_complex::20S_methylosome-SmD_complex::20S_methylosome_and_RG-containing_Sm_protein_complex::6S_methyltransferase_complex::JBP1-pICln_complex::SMN_complex,_U7_snRNA_specific::20S_methyltransferase_complex::AR_coactivator_complex::17S_U2_snRNP::SF3A1-SF3A2-SF3A3_complex::SF3b_complex::Exon_junction_complex::SRm160/30…	0.002	245	CDC5L core complex	0.0833	6	1	Rho guanyl-nucleotide exchange factor activity: 0.01281	guanyl-nucleotide exchange factor activity: 0.01592	phospholipid binding: 0.05044	protein serine/threonine kinase activity: 0.06063
728	2	Q92839, Q01844,	0.25	1	0	2	(E.F.G)_complex::12S_U11_snRNP::6S_methyltransferase_and_RG-containing_Sm_proteins_complex::20S_methylosome-SmD_complex::20S_methylosome_and_RG-containing_Sm_protein_complex::6S_methyltransferase_complex::JBP1-pICln_complex::SMN_complex,_U7_snRNA_specific::20S_methyltransferase_complex::AR_coactivator_complex::17S_U2_snRNP::SF3A1-SF3A2-SF3A3_complex::SF3b_complex::Exon_junction_complex::SRm160/30…	0.002	245	CPSF6-EWSR1-ITCH-NUDT21-POLR2A-UBAP2L complex	0.0833	6	0	hyaluronan synthase activity: 0.0004362	transferase activity transferring hexosyl groups: 0.005801	calmodulin binding: 0.02499	nucleotide binding: 0.05475	identical protein binding: 0.06927	RNA binding: 0.09431
731	2	O00165, Q01844,	16	4	4	2.75	(E.F.G)_complex::12S_U11_snRNP::6S_methyltransferase_and_RG-containing_Sm_proteins_complex::20S_methylosome-SmD_complex::20S_methylosome_and_RG-containing_Sm_protein_complex::6S_methyltransferase_complex::JBP1-pICln_complex::SMN_complex,_U7_snRNA_specific::20S_methyltransferase_complex::AR_coactivator_complex::17S_U2_snRNP::SF3A1-SF3A2-SF3A3_complex::SF3b_complex::Exon_junction_complex::SRm160/30…	0.002	245	CPSF6-EWSR1-ITCH-NUDT21-POLR2A-UBAP2L complex	0.0833	6	1	interleukin-1 binding: 0.0004362	protein N-terminus binding: 0.01506	calmodulin binding: 0.02499	nucleotide binding: 0.05475	identical protein binding: 0.06927	RNA binding: 0.09431
585	2	Q9BRP8, Q99986,	1	1	1	3	(E.F.G)_complex::12S_U11_snRNP::6S_methyltransferase_and_RG-containing_Sm_proteins_complex::20S_methylosome-SmD_complex::20S_methylosome_and_RG-containing_Sm_protein_complex::6S_methyltransferase_complex::JBP1-pICln_complex::SMN_complex,_U7_snRNA_specific::20S_methyltransferase_complex::AR_coactivator_complex::17S_U2_snRNP::SF3A1-SF3A2-SF3A3_complex::SF3b_complex::Exon_junction_complex::SRm160/30…	0.002	245	Exon junction complex (F4A3-MLN51-UPF3B-MAGOH-Y14-PYM)	0.0833	6	1	ribosome binding: 0.004209	transferase activity transferring phosphorus-containing groups: 0.01257	protein serine/threonine kinase activity: 0.06063	RNA binding: 0.09431
1078	2	P26583, Q9UPN6,	4	1	3	2	(E.F.G)_complex::12S_U11_snRNP::6S_methyltransferase_and_RG-containing_Sm_proteins_complex::20S_methylosome-SmD_complex::20S_methylosome_and_RG-containing_Sm_protein_complex::6S_methyltransferase_complex::JBP1-pICln_complex::SMN_complex,_U7_snRNA_specific::20S_methyltransferase_complex::AR_coactivator_complex::17S_U2_snRNP::SF3A1-SF3A2-SF3A3_complex::SF3b_complex::Exon_junction_complex::SRm160/30…	0.002	245	HMGB1-HMGB2-HSC70-ERP60-GAPDH complex	0.1	5	0	RNA polymerase core enzyme binding: 9.696e-05	RAGE receptor binding: 0.0006785	chemoattractant activity: 0.002421	DNA binding bending: 0.004836	single-stranded DNA binding: 0.0107	damaged DNA binding: 0.01209	double-stranded DNA binding: 0.0152	transcription regulatory region DNA binding: 0.02683	protein domain specific binding: 0.0281	nucleotide binding: 0.05475	RNA binding: 0.09431
1414	2	P52597, Q9H8H0,	0	0	0	0	(E.F.G)_complex::12S_U11_snRNP::6S_methyltransferase_and_RG-containing_Sm_proteins_complex::20S_methylosome-SmD_complex::20S_methylosome_and_RG-containing_Sm_protein_complex::6S_methyltransferase_complex::JBP1-pICln_complex::SMN_complex,_U7_snRNA_specific::20S_methyltransferase_complex::AR_coactivator_complex::17S_U2_snRNP::SF3A1-SF3A2-SF3A3_complex::SF3b_complex::Exon_junction_complex::SRm160/30…	0.002	245	HNRPF-HNRPH1 complex	0.25	2	1	single-stranded RNA binding: 0.004354	nucleotide binding: 0.05475	RNA binding: 0.09431
1479	2	P31943, P51148,	2.25	1	2	3.3333	(E.F.G)_complex::12S_U11_snRNP::6S_methyltransferase_and_RG-containing_Sm_proteins_complex::20S_methylosome-SmD_complex::20S_methylosome_and_RG-containing_Sm_protein_complex::6S_methyltransferase_complex::JBP1-pICln_complex::SMN_complex,_U7_snRNA_specific::20S_methyltransferase_complex::AR_coactivator_complex::17S_U2_snRNP::SF3A1-SF3A2-SF3A3_complex::SF3b_complex::Exon_junction_complex::SRm160/30…	0.002	245	HNRPF-HNRPH1 complex	0.25	2	0	poly(U) RNA binding: 0.002276	GDP binding: 0.006812	GTPase activity: 0.03547	GTP binding: 0.05351	nucleotide binding: 0.05475	RNA binding: 0.09431
552	2	P41214, O43143,	0	0	0	0	(E.F.G)_complex::12S_U11_snRNP::6S_methyltransferase_and_RG-containing_Sm_proteins_complex::20S_methylosome-SmD_complex::20S_methylosome_and_RG-containing_Sm_protein_complex::6S_methyltransferase_complex::JBP1-pICln_complex::SMN_complex,_U7_snRNA_specific::20S_methyltransferase_complex::AR_coactivator_complex::17S_U2_snRNP::SF3A1-SF3A2-SF3A3_complex::SF3b_complex::Exon_junction_complex::SRm160/30…	0.002	245	Large Drosha complex	0.025	20	0	RNA helicase activity: 0.001357	translation initiation factor activity: 0.01123	ATP-dependent helicase activity: 0.01262	receptor activity: 0.02612	RNA binding: 0.09431
615	2	Q96RW7, Q92499,	0	0	0	0	(E.F.G)_complex::12S_U11_snRNP::6S_methyltransferase_and_RG-containing_Sm_proteins_complex::20S_methylosome-SmD_complex::20S_methylosome_and_RG-containing_Sm_protein_complex::6S_methyltransferase_complex::JBP1-pICln_complex::SMN_complex,_U7_snRNA_specific::20S_methyltransferase_complex::AR_coactivator_complex::17S_U2_snRNP::SF3A1-SF3A2-SF3A3_complex::SF3b_complex::Exon_junction_complex::SRm160/30…	0.002	245	Large Drosha complex	0.025	20	0	DNA/RNA helicase activity: 4.848e-05	RNA helicase activity: 0.001357	poly(A) RNA binding: 0.002469	nuclease activity: 0.003436	exonuclease activity: 0.004016	double-stranded RNA binding: 0.004788	transcription cofactor activity: 0.009121	ATP-dependent helicase activity: 0.01262	chromatin binding: 0.05062	calcium ion binding: 0.09204
872	2	Q8N4V1, O43143,	1	1	1	2	(E.F.G)_complex::12S_U11_snRNP::6S_methyltransferase_and_RG-containing_Sm_proteins_complex::20S_methylosome-SmD_complex::20S_methylosome_and_RG-containing_Sm_protein_complex::6S_methyltransferase_complex::JBP1-pICln_complex::SMN_complex,_U7_snRNA_specific::20S_methyltransferase_complex::AR_coactivator_complex::17S_U2_snRNP::SF3A1-SF3A2-SF3A3_complex::SF3b_complex::Exon_junction_complex::SRm160/30…	0.002	245	Large Drosha complex	0.025	20	0	RNA helicase activity: 0.001357	magnesium ion transmembrane transporter activity: 0.001502	ATP-dependent helicase activity: 0.01262
1149	2	Q92499, Q5TC82,	0	0	0	0	(E.F.G)_complex::12S_U11_snRNP::6S_methyltransferase_and_RG-containing_Sm_proteins_complex::20S_methylosome-SmD_complex::20S_methylosome_and_RG-containing_Sm_protein_complex::6S_methyltransferase_complex::JBP1-pICln_complex::SMN_complex,_U7_snRNA_specific::20S_methyltransferase_complex::AR_coactivator_complex::17S_U2_snRNP::SF3A1-SF3A2-SF3A3_complex::SF3b_complex::Exon_junction_complex::SRm160/30…	0.002	245	Large Drosha complex	0.025	20	0	DNA/RNA helicase activity: 4.848e-05	RNA helicase activity: 0.001357	poly(A) RNA binding: 0.002469	nuclease activity: 0.003436	exonuclease activity: 0.004016	mRNA 3'-UTR binding: 0.004547	double-stranded RNA binding: 0.004788	transcription cofactor activity: 0.009121	ATP-dependent helicase activity: 0.01262	ubiquitin-protein ligase activity: 0.035	chromatin binding: 0.05062
1214	2	Q92499, Q9Y3I0,	0.25	1	0	3	(E.F.G)_complex::12S_U11_snRNP::6S_methyltransferase_and_RG-containing_Sm_proteins_complex::20S_methylosome-SmD_complex::20S_methylosome_and_RG-containing_Sm_protein_complex::6S_methyltransferase_complex::JBP1-pICln_complex::SMN_complex,_U7_snRNA_specific::20S_methyltransferase_complex::AR_coactivator_complex::17S_U2_snRNP::SF3A1-SF3A2-SF3A3_complex::SF3b_complex::Exon_junction_complex::SRm160/30…	0.002	245	Large Drosha complex	0.025	20	1	DNA/RNA helicase activity: 4.848e-05	RNA ligase activity: 9.696e-05	RNA ligase (ATP) activity: 9.696e-05	RNA helicase activity: 0.001357	poly(A) RNA binding: 0.002469	nuclease activity: 0.003436	exonuclease activity: 0.004016	vinculin binding: 0.004257	double-stranded RNA binding: 0.004788	transcription cofactor activity: 0.009121	ATP-dependent helicase activity: 0.01262	ATP binding: 0.0148	chromatin binding: 0.05062
1319	2	Q92499, Q8IYT4,	0	0	0	0	(E.F.G)_complex::12S_U11_snRNP::6S_methyltransferase_and_RG-containing_Sm_proteins_complex::20S_methylosome-SmD_complex::20S_methylosome_and_RG-containing_Sm_protein_complex::6S_methyltransferase_complex::JBP1-pICln_complex::SMN_complex,_U7_snRNA_specific::20S_methyltransferase_complex::AR_coactivator_complex::17S_U2_snRNP::SF3A1-SF3A2-SF3A3_complex::SF3b_complex::Exon_junction_complex::SRm160/30…	0.002	245	Large Drosha complex	0.025	20	1	DNA/RNA helicase activity: 4.848e-05	microtubule-severing ATPase activity: 0.0008238	RNA helicase activity: 0.001357	poly(A) RNA binding: 0.002469	nuclease activity: 0.003436	exonuclease activity: 0.004016	double-stranded RNA binding: 0.004788	nucleoside-triphosphatase activity: 0.007631	transcription cofactor activity: 0.009121	ATP-dependent helicase activity: 0.01262	ATP binding: 0.0148	microtubule binding: 0.02536	chromatin binding: 0.05062
1369	2	Q92499, Q9Y224,	0	0	0	0	(E.F.G)_complex::12S_U11_snRNP::6S_methyltransferase_and_RG-containing_Sm_proteins_complex::20S_methylosome-SmD_complex::20S_methylosome_and_RG-containing_Sm_protein_complex::6S_methyltransferase_complex::JBP1-pICln_complex::SMN_complex,_U7_snRNA_specific::20S_methyltransferase_complex::AR_coactivator_complex::17S_U2_snRNP::SF3A1-SF3A2-SF3A3_complex::SF3b_complex::Exon_junction_complex::SRm160/30…	0.002	245	Large Drosha complex	0.025	20	1	DNA/RNA helicase activity: 4.848e-05	RNA helicase activity: 0.001357	RNA polymerase II core binding: 0.001502	poly(A) RNA binding: 0.002469	nuclease activity: 0.003436	exonuclease activity: 0.004016	double-stranded RNA binding: 0.004788	transcription cofactor activity: 0.009121	ATP-dependent helicase activity: 0.01262	chromatin binding: 0.05062	identical protein binding: 0.06927
1398	2	Q1KMD3, Q9BUJ2,	0	0	0	0	(E.F.G)_complex::12S_U11_snRNP::6S_methyltransferase_and_RG-containing_Sm_proteins_complex::20S_methylosome-SmD_complex::20S_methylosome_and_RG-containing_Sm_protein_complex::6S_methyltransferase_complex::JBP1-pICln_complex::SMN_complex,_U7_snRNA_specific::20S_methyltransferase_complex::AR_coactivator_complex::17S_U2_snRNP::SF3A1-SF3A2-SF3A3_complex::SF3b_complex::Exon_junction_complex::SRm160/30…	0.002	245	Large Drosha complex	0.025	20	0	nucleic acid binding: 0.005754	enzyme binding: 0.0378	RNA binding: 0.09431
1412	2	O43143, Q9BYC5,	0	0	0	0	(E.F.G)_complex::12S_U11_snRNP::6S_methyltransferase_and_RG-containing_Sm_proteins_complex::20S_methylosome-SmD_complex::20S_methylosome_and_RG-containing_Sm_protein_complex::6S_methyltransferase_complex::JBP1-pICln_complex::SMN_complex,_U7_snRNA_specific::20S_methyltransferase_complex::AR_coactivator_complex::17S_U2_snRNP::SF3A1-SF3A2-SF3A3_complex::SF3b_complex::Exon_junction_complex::SRm160/30…	0.002	245	Large Drosha complex	0.025	20	0	glycoprotein 6-alpha-L-fucosyltransferase activity: 0.0003393	alpha-(1->6)-fucosyltransferase activity: 0.0003393	RNA helicase activity: 0.001357	transferase activity transferring glycosyl groups: 0.008448	ATP-dependent helicase activity: 0.01262	SH3 domain binding: 0.01806
1450	2	O43143, Q6PML9,	0	0	0	0	(E.F.G)_complex::12S_U11_snRNP::6S_methyltransferase_and_RG-containing_Sm_proteins_complex::20S_methylosome-SmD_complex::20S_methylosome_and_RG-containing_Sm_protein_complex::6S_methyltransferase_complex::JBP1-pICln_complex::SMN_complex,_U7_snRNA_specific::20S_methyltransferase_complex::AR_coactivator_complex::17S_U2_snRNP::SF3A1-SF3A2-SF3A3_complex::SF3b_complex::Exon_junction_complex::SRm160/30…	0.002	245	Large Drosha complex	0.025	20	0	RNA helicase activity: 0.001357	cation transmembrane transporter activity: 0.002905	ligand-dependent nuclear receptor binding: 0.00305	ligand-dependent nuclear receptor transcription coactivator activity: 0.005608	ATP-dependent helicase activity: 0.01262	chromatin binding: 0.05062	nucleotide binding: 0.05475
1572	2	Q7Z7N9, Q9BUJ2,	0	0	0	0	(E.F.G)_complex::12S_U11_snRNP::6S_methyltransferase_and_RG-containing_Sm_proteins_complex::20S_methylosome-SmD_complex::20S_methylosome_and_RG-containing_Sm_protein_complex::6S_methyltransferase_complex::JBP1-pICln_complex::SMN_complex,_U7_snRNA_specific::20S_methyltransferase_complex::AR_coactivator_complex::17S_U2_snRNP::SF3A1-SF3A2-SF3A3_complex::SF3b_complex::Exon_junction_complex::SRm160/30…	0.002	245	Large Drosha complex	0.025	20	0	enzyme binding: 0.0378	RNA binding: 0.09431
1579	2	Q92499, Q02809,	0	0	0	0	(E.F.G)_complex::12S_U11_snRNP::6S_methyltransferase_and_RG-containing_Sm_proteins_complex::20S_methylosome-SmD_complex::20S_methylosome_and_RG-containing_Sm_protein_complex::6S_methyltransferase_complex::JBP1-pICln_complex::SMN_complex,_U7_snRNA_specific::20S_methyltransferase_complex::AR_coactivator_complex::17S_U2_snRNP::SF3A1-SF3A2-SF3A3_complex::SF3b_complex::Exon_junction_complex::SRm160/30…	0.002	245	Large Drosha complex	0.025	20	0	DNA/RNA helicase activity: 4.848e-05	procollagen-lysine 5-dioxygenase activity: 0.0003393	RNA helicase activity: 0.001357	poly(A) RNA binding: 0.002469	nuclease activity: 0.003436	L-ascorbic acid binding: 0.003533	exonuclease activity: 0.004016	double-stranded RNA binding: 0.004788	transcription cofactor activity: 0.009121	ATP-dependent helicase activity: 0.01262	iron ion binding: 0.01977	chromatin binding: 0.05062	protein homodimerization activity: 0.08226
1580	2	Q8ND56, Q92499,	0	0	0	0	(E.F.G)_complex::12S_U11_snRNP::6S_methyltransferase_and_RG-containing_Sm_proteins_complex::20S_methylosome-SmD_complex::20S_methylosome_and_RG-containing_Sm_protein_complex::6S_methyltransferase_complex::JBP1-pICln_complex::SMN_complex,_U7_snRNA_specific::20S_methyltransferase_complex::AR_coactivator_complex::17S_U2_snRNP::SF3A1-SF3A2-SF3A3_complex::SF3b_complex::Exon_junction_complex::SRm160/30…	0.002	245	Large Drosha complex	0.025	20	1	double-stranded RNA binding: 5.701e-06	DNA/RNA helicase activity: 4.848e-05	RNA helicase activity: 0.001357	poly(A) RNA binding: 0.002469	nuclease activity: 0.003436	exonuclease activity: 0.004016	single-stranded RNA binding: 0.004354	transcription cofactor activity: 0.009121	ATP-dependent helicase activity: 0.01262	double-stranded DNA binding: 0.0152	chromatin binding: 0.05062
603	2	O15116, O15357,	2.25	2	1	3	(E.F.G)_complex::12S_U11_snRNP::6S_methyltransferase_and_RG-containing_Sm_proteins_complex::20S_methylosome-SmD_complex::20S_methylosome_and_RG-containing_Sm_protein_complex::6S_methyltransferase_complex::JBP1-pICln_complex::SMN_complex,_U7_snRNA_specific::20S_methyltransferase_complex::AR_coactivator_complex::17S_U2_snRNP::SF3A1-SF3A2-SF3A3_complex::SF3b_complex::Exon_junction_complex::SRm160/30…	0.002	245	LSm1-7 complex	0.0714	7	1	inositol-polyphosphate 5-phosphatase activity: 0.001647	phosphatidylinositol-3 4 5-trisphosphate binding: 0.003291	SH2 domain binding: 0.005222	SH3 domain binding: 0.01806	actin binding: 0.05292	RNA binding: 0.09431
605	2	O15116, O96028,	9	3	3	3.1667	(E.F.G)_complex::12S_U11_snRNP::6S_methyltransferase_and_RG-containing_Sm_proteins_complex::20S_methylosome-SmD_complex::20S_methylosome_and_RG-containing_Sm_protein_complex::6S_methyltransferase_complex::JBP1-pICln_complex::SMN_complex,_U7_snRNA_specific::20S_methyltransferase_complex::AR_coactivator_complex::17S_U2_snRNP::SF3A1-SF3A2-SF3A3_complex::SF3b_complex::Exon_junction_complex::SRm160/30…	0.002	245	LSm1-7 complex	0.0714	7	1	histone-lysine N-methyltransferase activity: 0.004112	chromatin binding: 0.05062	RNA binding: 0.09431
808	2	P62312, Q99747,	8100	88	92	3.1556	(E.F.G)_complex::12S_U11_snRNP::6S_methyltransferase_and_RG-containing_Sm_proteins_complex::20S_methylosome-SmD_complex::20S_methylosome_and_RG-containing_Sm_protein_complex::6S_methyltransferase_complex::JBP1-pICln_complex::SMN_complex,_U7_snRNA_specific::20S_methyltransferase_complex::AR_coactivator_complex::17S_U2_snRNP::SF3A1-SF3A2-SF3A3_complex::SF3b_complex::Exon_junction_complex::SRm160/30…	0.002	245	LSm2-8 complex	0.0714	7	1	RNA binding: 0.09431
1295	2	Q08AM6, Q9Y4Z0,	30.25	4	7	2.4545	(E.F.G)_complex::12S_U11_snRNP::6S_methyltransferase_and_RG-containing_Sm_proteins_complex::20S_methylosome-SmD_complex::20S_methylosome_and_RG-containing_Sm_protein_complex::6S_methyltransferase_complex::JBP1-pICln_complex::SMN_complex,_U7_snRNA_specific::20S_methyltransferase_complex::AR_coactivator_complex::17S_U2_snRNP::SF3A1-SF3A2-SF3A3_complex::SF3b_complex::Exon_junction_complex::SRm160/30…	0.002	245	LSm2-8 complex	0.0714	7	0	kinase activator activity: 0.001018	receptor activity: 0.02612	RNA binding: 0.09431
1790	2	P11277, Q9Y4Y9,	0.25	0	1	3	(E.F.G)_complex::12S_U11_snRNP::6S_methyltransferase_and_RG-containing_Sm_proteins_complex::20S_methylosome-SmD_complex::20S_methylosome_and_RG-containing_Sm_protein_complex::6S_methyltransferase_complex::JBP1-pICln_complex::SMN_complex,_U7_snRNA_specific::20S_methyltransferase_complex::AR_coactivator_complex::17S_U2_snRNP::SF3A1-SF3A2-SF3A3_complex::SF3b_complex::Exon_junction_complex::SRm160/30…	0.002	245	LSm2-8 complex	0.0714	7	1	ankyrin binding: 0.003291	structural constituent of cytoskeleton: 0.01573	actin filament binding: 0.01611	protein heterodimerization activity: 0.04915	phospholipid binding: 0.05044	actin binding: 0.05292	RNA binding: 0.09431
1166	2	Q13045, Q8WYQ5,	56.25	4	11	2.9333	(E.F.G)_complex::12S_U11_snRNP::6S_methyltransferase_and_RG-containing_Sm_proteins_complex::20S_methylosome-SmD_complex::20S_methylosome_and_RG-containing_Sm_protein_complex::6S_methyltransferase_complex::JBP1-pICln_complex::SMN_complex,_U7_snRNA_specific::20S_methyltransferase_complex::AR_coactivator_complex::17S_U2_snRNP::SF3A1-SF3A2-SF3A3_complex::SF3b_complex::Exon_junction_complex::SRm160/30…	0.002	245	Microprocessor complex	0.25	2	1	double-stranded RNA binding: 0.004788	actin binding: 0.05292
604	2	O15116, O00401,	1	1	1	3	(E.F.G)_complex::12S_U11_snRNP::6S_methyltransferase_and_RG-containing_Sm_proteins_complex::20S_methylosome-SmD_complex::20S_methylosome_and_RG-containing_Sm_protein_complex::6S_methyltransferase_complex::JBP1-pICln_complex::SMN_complex,_U7_snRNA_specific::20S_methyltransferase_complex::AR_coactivator_complex::17S_U2_snRNP::SF3A1-SF3A2-SF3A3_complex::SF3b_complex::Exon_junction_complex::SRm160/30…	0.002	245	N-WASp homomer	0.5	1	1	small GTPase regulator activity: 0.004981	actin binding: 0.05292	RNA binding: 0.09431
784	2	P43243, Q9NZM1,	121	13	9	3.1818	(E.F.G)_complex::12S_U11_snRNP::6S_methyltransferase_and_RG-containing_Sm_proteins_complex::20S_methylosome-SmD_complex::20S_methylosome_and_RG-containing_Sm_protein_complex::6S_methyltransferase_complex::JBP1-pICln_complex::SMN_complex,_U7_snRNA_specific::20S_methyltransferase_complex::AR_coactivator_complex::17S_U2_snRNP::SF3A1-SF3A2-SF3A3_complex::SF3b_complex::Exon_junction_complex::SRm160/30…	0.002	245	p54(nrb)-PSF-matrin3 complex	0.1667	3	0	structural molecule activity: 0.02867	phospholipid binding: 0.05044	nucleotide binding: 0.05475	RNA binding: 0.09431
652	2	Q15717, Q13243,	0	0	0	0	(E.F.G)_complex::12S_U11_snRNP::6S_methyltransferase_and_RG-containing_Sm_proteins_complex::20S_methylosome-SmD_complex::20S_methylosome_and_RG-containing_Sm_protein_complex::6S_methyltransferase_complex::JBP1-pICln_complex::SMN_complex,_U7_snRNA_specific::20S_methyltransferase_complex::AR_coactivator_complex::17S_U2_snRNP::SF3A1-SF3A2-SF3A3_complex::SF3b_complex::Exon_junction_complex::SRm160/30…	0.002	245	PGC-1-SRp40-SRp55-SRp75 complex	0.125	4	0	mRNA 3'-UTR AU-rich region binding: 0.0003878	nucleotide binding: 0.0007927	RS domain binding: 0.001066	AU-rich element binding: 0.001841	RNA binding: 0.002461	mRNA binding: 0.01348	protein kinase binding: 0.04735
834	2	Q9UM00, Q13243,	0	0	0	0	(E.F.G)_complex::12S_U11_snRNP::6S_methyltransferase_and_RG-containing_Sm_proteins_complex::20S_methylosome-SmD_complex::20S_methylosome_and_RG-containing_Sm_protein_complex::6S_methyltransferase_complex::JBP1-pICln_complex::SMN_complex,_U7_snRNA_specific::20S_methyltransferase_complex::AR_coactivator_complex::17S_U2_snRNP::SF3A1-SF3A2-SF3A3_complex::SF3b_complex::Exon_junction_complex::SRm160/30…	0.002	245	PGC-1-SRp40-SRp55-SRp75 complex	0.125	4	0	RS domain binding: 0.001066	nucleotide binding: 0.05475	RNA binding: 0.09431
1170	2	Q08170, Q96S55,	729	27	27	2	(E.F.G)_complex::12S_U11_snRNP::6S_methyltransferase_and_RG-containing_Sm_proteins_complex::20S_methylosome-SmD_complex::20S_methylosome_and_RG-containing_Sm_protein_complex::6S_methyltransferase_complex::JBP1-pICln_complex::SMN_complex,_U7_snRNA_specific::20S_methyltransferase_complex::AR_coactivator_complex::17S_U2_snRNP::SF3A1-SF3A2-SF3A3_complex::SF3b_complex::Exon_junction_complex::SRm160/30…	0.002	245	PGC-1-SRp40-SRp55-SRp75 complex	0.125	4	0	ATPase activity: 0.02096	nucleotide binding: 0.05475	identical protein binding: 0.06927	RNA binding: 0.09431
1215	2	Q13243, Q9Y320,	0	0	0	0	(E.F.G)_complex::12S_U11_snRNP::6S_methyltransferase_and_RG-containing_Sm_proteins_complex::20S_methylosome-SmD_complex::20S_methylosome_and_RG-containing_Sm_protein_complex::6S_methyltransferase_complex::JBP1-pICln_complex::SMN_complex,_U7_snRNA_specific::20S_methyltransferase_complex::AR_coactivator_complex::17S_U2_snRNP::SF3A1-SF3A2-SF3A3_complex::SF3b_complex::Exon_junction_complex::SRm160/30…	0.002	245	PGC-1-SRp40-SRp55-SRp75 complex	0.125	4	0	RS domain binding: 0.001066	nucleotide binding: 0.05475	molecular_function: 0.06358	RNA binding: 0.09431
1222	2	Q13247, O75494,	0.25	0	1	2	(E.F.G)_complex::12S_U11_snRNP::6S_methyltransferase_and_RG-containing_Sm_proteins_complex::20S_methylosome-SmD_complex::20S_methylosome_and_RG-containing_Sm_protein_complex::6S_methyltransferase_complex::JBP1-pICln_complex::SMN_complex,_U7_snRNA_specific::20S_methyltransferase_complex::AR_coactivator_complex::17S_U2_snRNP::SF3A1-SF3A2-SF3A3_complex::SF3b_complex::Exon_junction_complex::SRm160/30…	0.002	245	PGC-1-SRp40-SRp55-SRp75 complex	0.125	4	0	nucleotide binding: 0.0007927	RS domain binding: 0.001066	RNA binding: 0.002461	unfolded protein binding: 0.01578
1527	2	Q9Y4Y9, Q96QC0,	0.25	0	1	3	(E.F.G)_complex::12S_U11_snRNP::6S_methyltransferase_and_RG-containing_Sm_proteins_complex::20S_methylosome-SmD_complex::20S_methylosome_and_RG-containing_Sm_protein_complex::6S_methyltransferase_complex::JBP1-pICln_complex::SMN_complex,_U7_snRNA_specific::20S_methyltransferase_complex::AR_coactivator_complex::17S_U2_snRNP::SF3A1-SF3A2-SF3A3_complex::SF3b_complex::Exon_junction_complex::SRm160/30…	0.002	245	PNUTS-PP1 complex	0.25	2	1	RNA binding: 0.002461	protein phosphatase inhibitor activity: 0.003291
1391	2	Q9NYV4, O75909,	6.25	3	2	2.4	(E.F.G)_complex::12S_U11_snRNP::6S_methyltransferase_and_RG-containing_Sm_proteins_complex::20S_methylosome-SmD_complex::20S_methylosome_and_RG-containing_Sm_protein_complex::6S_methyltransferase_complex::JBP1-pICln_complex::SMN_complex,_U7_snRNA_specific::20S_methyltransferase_complex::AR_coactivator_complex::17S_U2_snRNP::SF3A1-SF3A2-SF3A3_complex::SF3b_complex::Exon_junction_complex::SRm160/30…	0.002	245	P-TEFb.4 complex	0.25	2	1	RNA polymerase II carboxy-terminal domain kinase activity: 2.011e-06	cyclin-dependent protein serine/threonine kinase activity: 8.39e-06	cyclin binding: 0.002615	protein kinase binding: 0.04735	protein kinase activity: 0.05461	protein serine/threonine kinase activity: 0.06063
964	2	Q96HR8, O43719,	0	0	0	0	(E.F.G)_complex::12S_U11_snRNP::6S_methyltransferase_and_RG-containing_Sm_proteins_complex::20S_methylosome-SmD_complex::20S_methylosome_and_RG-containing_Sm_protein_complex::6S_methyltransferase_complex::JBP1-pICln_complex::SMN_complex,_U7_snRNA_specific::20S_methyltransferase_complex::AR_coactivator_complex::17S_U2_snRNP::SF3A1-SF3A2-SF3A3_complex::SF3b_complex::Exon_junction_complex::SRm160/30…	0.002	245	RNA pol II containing coactivator complex Tat-SF	0.1	5	0	RNA binding: 0.002461	nucleotide binding: 0.05475
1303	2	Q6KC79, Q15428,	0	0	0	0	(E.F.G)_complex::12S_U11_snRNP::6S_methyltransferase_and_RG-containing_Sm_proteins_complex::20S_methylosome-SmD_complex::20S_methylosome_and_RG-containing_Sm_protein_complex::6S_methyltransferase_complex::JBP1-pICln_complex::SMN_complex,_U7_snRNA_specific::20S_methyltransferase_complex::AR_coactivator_complex::17S_U2_snRNP::SF3A1-SF3A2-SF3A3_complex::SF3b_complex::Exon_junction_complex::SRm160/30…	0.002	245	SF3A1-SF3A2-SF3A3 complex	0.1667	3	1	mediator complex binding: 0.0002908	chromo shadow domain binding: 0.0009691	histone deacetylase binding: 0.009937	protein N-terminus binding: 0.01506	protein C-terminus binding: 0.02857	chromatin binding: 0.05062
560	2	Q01085, Q15427,	0	0	0	0	(E.F.G)_complex::12S_U11_snRNP::6S_methyltransferase_and_RG-containing_Sm_proteins_complex::20S_methylosome-SmD_complex::20S_methylosome_and_RG-containing_Sm_protein_complex::6S_methyltransferase_complex::JBP1-pICln_complex::SMN_complex,_U7_snRNA_specific::20S_methyltransferase_complex::AR_coactivator_complex::17S_U2_snRNP::SF3A1-SF3A2-SF3A3_complex::SF3b_complex::Exon_junction_complex::SRm160/30…	0.002	245	SF3b complex	0.0625	8	1	nucleotide binding: 0.0007927	AU-rich element binding: 0.001841	RNA binding: 0.002461	nucleic acid binding: 0.005754
692	2	Q86XP3, Q9UPW0,	0	0	0	0	(E.F.G)_complex::12S_U11_snRNP::6S_methyltransferase_and_RG-containing_Sm_proteins_complex::20S_methylosome-SmD_complex::20S_methylosome_and_RG-containing_Sm_protein_complex::6S_methyltransferase_complex::JBP1-pICln_complex::SMN_complex,_U7_snRNA_specific::20S_methyltransferase_complex::AR_coactivator_complex::17S_U2_snRNP::SF3A1-SF3A2-SF3A3_complex::SF3b_complex::Exon_junction_complex::SRm160/30…	0.002	245	SF3b complex	0.0625	8	0	DNA binding bending: 0.004836	ATP-dependent helicase activity: 0.01262	sequence-specific DNA binding: 0.06516	RNA binding: 0.09431
702	2	Q86XP3, P23352,	0	0	0	0	(E.F.G)_complex::12S_U11_snRNP::6S_methyltransferase_and_RG-containing_Sm_proteins_complex::20S_methylosome-SmD_complex::20S_methylosome_and_RG-containing_Sm_protein_complex::6S_methyltransferase_complex::JBP1-pICln_complex::SMN_complex,_U7_snRNA_specific::20S_methyltransferase_complex::AR_coactivator_complex::17S_U2_snRNP::SF3A1-SF3A2-SF3A3_complex::SF3b_complex::Exon_junction_complex::SRm160/30…	0.002	245	SF3b complex	0.0625	8	0	extracellular matrix structural constituent: 0.00816	serine-type endopeptidase inhibitor activity: 0.01152	ATP-dependent helicase activity: 0.01262	heparin binding: 0.01682	RNA binding: 0.09431
703	2	P61011, Q9Y3B4,	0	0	0	0	(E.F.G)_complex::12S_U11_snRNP::6S_methyltransferase_and_RG-containing_Sm_proteins_complex::20S_methylosome-SmD_complex::20S_methylosome_and_RG-containing_Sm_protein_complex::6S_methyltransferase_complex::JBP1-pICln_complex::SMN_complex,_U7_snRNA_specific::20S_methyltransferase_complex::AR_coactivator_complex::17S_U2_snRNP::SF3A1-SF3A2-SF3A3_complex::SF3b_complex::Exon_junction_complex::SRm160/30…	0.002	245	SF3b complex	0.0625	8	0	endoplasmic reticulum signal peptide binding: 0.0004847	7S RNA binding: 0.001114	ribonucleoprotein complex binding: 0.002905	GDP binding: 0.006812	drug binding: 0.008111	GTPase activity: 0.03547	GTP binding: 0.05351	nucleotide binding: 0.05475	RNA binding: 0.09431
1072	2	Q86XP3, O75676,	4	0	4	2	(E.F.G)_complex::12S_U11_snRNP::6S_methyltransferase_and_RG-containing_Sm_proteins_complex::20S_methylosome-SmD_complex::20S_methylosome_and_RG-containing_Sm_protein_complex::6S_methyltransferase_complex::JBP1-pICln_complex::SMN_complex,_U7_snRNA_specific::20S_methyltransferase_complex::AR_coactivator_complex::17S_U2_snRNP::SF3A1-SF3A2-SF3A3_complex::SF3b_complex::Exon_junction_complex::SRm160/30…	0.002	245	SF3b complex	0.0625	8	0	mitogen-activated protein kinase p38 binding: 0.0004362	ribosomal protein S6 kinase activity: 0.001114	ATP-dependent helicase activity: 0.01262	ATP binding: 0.0148	magnesium ion binding: 0.03026	protein serine/threonine kinase activity: 0.06063	RNA binding: 0.09431
1131	2	Q9BTD8, Q13435,	0	0	0	0	(E.F.G)_complex::12S_U11_snRNP::6S_methyltransferase_and_RG-containing_Sm_proteins_complex::20S_methylosome-SmD_complex::20S_methylosome_and_RG-containing_Sm_protein_complex::6S_methyltransferase_complex::JBP1-pICln_complex::SMN_complex,_U7_snRNA_specific::20S_methyltransferase_complex::AR_coactivator_complex::17S_U2_snRNP::SF3A1-SF3A2-SF3A3_complex::SF3b_complex::Exon_junction_complex::SRm160/30…	0.002	245	SF3b complex	0.0625	8	0	nucleic acid binding: 0.005754	nucleotide binding: 0.05475	RNA binding: 0.09431
1320	2	Q86XP3, Q9Y314,	552.25	26	21	2.5106	(E.F.G)_complex::12S_U11_snRNP::6S_methyltransferase_and_RG-containing_Sm_proteins_complex::20S_methylosome-SmD_complex::20S_methylosome_and_RG-containing_Sm_protein_complex::6S_methyltransferase_complex::JBP1-pICln_complex::SMN_complex,_U7_snRNA_specific::20S_methyltransferase_complex::AR_coactivator_complex::17S_U2_snRNP::SF3A1-SF3A2-SF3A3_complex::SF3b_complex::Exon_junction_complex::SRm160/30…	0.002	245	SF3b complex	0.0625	8	1	ATP-dependent helicase activity: 0.01262	RNA binding: 0.09431
1575	2	O00461, P17844,	0	0	0	0	(E.F.G)_complex::12S_U11_snRNP::6S_methyltransferase_and_RG-containing_Sm_proteins_complex::20S_methylosome-SmD_complex::20S_methylosome_and_RG-containing_Sm_protein_complex::6S_methyltransferase_complex::JBP1-pICln_complex::SMN_complex,_U7_snRNA_specific::20S_methyltransferase_complex::AR_coactivator_complex::17S_U2_snRNP::SF3A1-SF3A2-SF3A3_complex::SF3b_complex::Exon_junction_complex::SRm160/30…	0.002	245	snRNP-free U1A (SF-A) complex	0.125	4	0	pre-mRNA binding: 0.001066	RNA helicase activity: 0.001357	estrogen receptor binding: 0.003919	ATP-dependent RNA helicase activity: 0.004016	calcium-dependent protein binding: 0.00662	androgen receptor binding: 0.007919	transcription cofactor activity: 0.009121	ATP-dependent helicase activity: 0.01262	calmodulin binding: 0.02499	transcription coactivator activity: 0.03209	enzyme binding: 0.0378
738	2	Q16864, O95071,	0	0	0	0	(E.F.G)_complex::12S_U11_snRNP::6S_methyltransferase_and_RG-containing_Sm_proteins_complex::20S_methylosome-SmD_complex::20S_methylosome_and_RG-containing_Sm_protein_complex::6S_methyltransferase_complex::JBP1-pICln_complex::SMN_complex,_U7_snRNA_specific::20S_methyltransferase_complex::AR_coactivator_complex::17S_U2_snRNP::SF3A1-SF3A2-SF3A3_complex::SF3b_complex::Exon_junction_complex::SRm160/30…	0.002	245	SNW1 complex	0.0278	18	1	ATPase activity uncoupled: 4.848e-05	ubiquitin-ubiquitin ligase activity: 0.001211	proton-transporting ATPase activity rotational mechanism: 0.002421	hydrogen ion transmembrane transporter activity: 0.004595	ubiquitin binding: 0.00739	ubiquitin-protein ligase activity: 0.035	RNA binding: 0.09431
739	2	Q15061, O95071,	240.25	18	13	2.1935	(E.F.G)_complex::12S_U11_snRNP::6S_methyltransferase_and_RG-containing_Sm_proteins_complex::20S_methylosome-SmD_complex::20S_methylosome_and_RG-containing_Sm_protein_complex::6S_methyltransferase_complex::JBP1-pICln_complex::SMN_complex,_U7_snRNA_specific::20S_methyltransferase_complex::AR_coactivator_complex::17S_U2_snRNP::SF3A1-SF3A2-SF3A3_complex::SF3b_complex::Exon_junction_complex::SRm160/30…	0.002	245	SNW1 complex	0.0278	18	0	ubiquitin-ubiquitin ligase activity: 0.001211	ubiquitin binding: 0.00739	ubiquitin-protein ligase activity: 0.035	RNA binding: 0.09431
1765	2	O75643, P50416,	0	0	0	0	(E.F.G)_complex::12S_U11_snRNP::6S_methyltransferase_and_RG-containing_Sm_proteins_complex::20S_methylosome-SmD_complex::20S_methylosome_and_RG-containing_Sm_protein_complex::6S_methyltransferase_complex::JBP1-pICln_complex::SMN_complex,_U7_snRNA_specific::20S_methyltransferase_complex::AR_coactivator_complex::17S_U2_snRNP::SF3A1-SF3A2-SF3A3_complex::SF3b_complex::Exon_junction_complex::SRm160/30…	0.002	245	SNW1 complex	0.0278	18	0	carnitine O-palmitoyltransferase activity: 0.0009207	identical protein binding: 0.00129	ATP-dependent RNA helicase activity: 0.004016	transferase activity transferring acyl groups: 0.007101	helicase activity: 0.01061	ATP-dependent helicase activity: 0.01262
660	2	Q15637, Q9UPU3,	0	0	0	0	(E.F.G)_complex::12S_U11_snRNP::6S_methyltransferase_and_RG-containing_Sm_proteins_complex::20S_methylosome-SmD_complex::20S_methylosome_and_RG-containing_Sm_protein_complex::6S_methyltransferase_complex::JBP1-pICln_complex::SMN_complex,_U7_snRNA_specific::20S_methyltransferase_complex::AR_coactivator_complex::17S_U2_snRNP::SF3A1-SF3A2-SF3A3_complex::SF3b_complex::Exon_junction_complex::SRm160/30…	0.002	245	Spliceosome	0.0035	143	0	neuropeptide receptor activity: 0.0009207	transcription corepressor activity: 0.02697	RNA binding: 0.09431
669	2	Q05519, Q92610,	0	0	0	0	(E.F.G)_complex::12S_U11_snRNP::6S_methyltransferase_and_RG-containing_Sm_proteins_complex::20S_methylosome-SmD_complex::20S_methylosome_and_RG-containing_Sm_protein_complex::6S_methyltransferase_complex::JBP1-pICln_complex::SMN_complex,_U7_snRNA_specific::20S_methyltransferase_complex::AR_coactivator_complex::17S_U2_snRNP::SF3A1-SF3A2-SF3A3_complex::SF3b_complex::Exon_junction_complex::SRm160/30…	0.002	245	Spliceosome	0.0035	143	0	nucleotide binding: 0.05475	RNA binding: 0.09431
670	2	P42167, Q14011,	1	0	2	3.5	(E.F.G)_complex::12S_U11_snRNP::6S_methyltransferase_and_RG-containing_Sm_proteins_complex::20S_methylosome-SmD_complex::20S_methylosome_and_RG-containing_Sm_protein_complex::6S_methyltransferase_complex::JBP1-pICln_complex::SMN_complex,_U7_snRNA_specific::20S_methyltransferase_complex::AR_coactivator_complex::17S_U2_snRNP::SF3A1-SF3A2-SF3A3_complex::SF3b_complex::Exon_junction_complex::SRm160/30…	0.002	245	Spliceosome	0.0035	143	1	SSU rRNA binding: 0.0007269	translation repressor activity: 0.001066	lamin binding: 0.002228	mRNA 3'-UTR binding: 0.004547	nucleotide binding: 0.05475
690	2	P84103, P31483,	0	0	0	0	(E.F.G)_complex::12S_U11_snRNP::6S_methyltransferase_and_RG-containing_Sm_proteins_complex::20S_methylosome-SmD_complex::20S_methylosome_and_RG-containing_Sm_protein_complex::6S_methyltransferase_complex::JBP1-pICln_complex::SMN_complex,_U7_snRNA_specific::20S_methyltransferase_complex::AR_coactivator_complex::17S_U2_snRNP::SF3A1-SF3A2-SF3A3_complex::SF3b_complex::Exon_junction_complex::SRm160/30…	0.002	245	Spliceosome	0.0035	143	0	nucleotide binding: 0.0007927	AU-rich element binding: 0.001841	phospholipase binding: 0.002228	poly(A) RNA binding: 0.002469	RNA binding: 0.09431
757	2	P18583, P41223,	0	0	0	0	(E.F.G)_complex::12S_U11_snRNP::6S_methyltransferase_and_RG-containing_Sm_proteins_complex::20S_methylosome-SmD_complex::20S_methylosome_and_RG-containing_Sm_protein_complex::6S_methyltransferase_complex::JBP1-pICln_complex::SMN_complex,_U7_snRNA_specific::20S_methyltransferase_complex::AR_coactivator_complex::17S_U2_snRNP::SF3A1-SF3A2-SF3A3_complex::SF3b_complex::Exon_junction_complex::SRm160/30…	0.002	245	Spliceosome	0.0035	143	0	RS domain binding: 0.001066	RNA binding: 0.09431
796	2	Q15386, Q96T37,	16	3	5	3.625	(E.F.G)_complex::12S_U11_snRNP::6S_methyltransferase_and_RG-containing_Sm_proteins_complex::20S_methylosome-SmD_complex::20S_methylosome_and_RG-containing_Sm_protein_complex::6S_methyltransferase_complex::JBP1-pICln_complex::SMN_complex,_U7_snRNA_specific::20S_methyltransferase_complex::AR_coactivator_complex::17S_U2_snRNP::SF3A1-SF3A2-SF3A3_complex::SF3b_complex::Exon_junction_complex::SRm160/30…	0.002	245	Spliceosome	0.0035	143	1	ubiquitin-protein ligase activity: 0.035	nucleotide binding: 0.05475	RNA binding: 0.09431
1002	2	O95400, Q14019,	0	0	0	0	(E.F.G)_complex::12S_U11_snRNP::6S_methyltransferase_and_RG-containing_Sm_proteins_complex::20S_methylosome-SmD_complex::20S_methylosome_and_RG-containing_Sm_protein_complex::6S_methyltransferase_complex::JBP1-pICln_complex::SMN_complex,_U7_snRNA_specific::20S_methyltransferase_complex::AR_coactivator_complex::17S_U2_snRNP::SF3A1-SF3A2-SF3A3_complex::SF3b_complex::Exon_junction_complex::SRm160/30…	0.002	245	Spliceosome	0.0035	143	1	ribonucleoprotein complex binding: 0.002905	enzyme binding: 0.0378	actin binding: 0.05292
1023	2	Q14004, Q9NYV4,	0	0	0	0	(E.F.G)_complex::12S_U11_snRNP::6S_methyltransferase_and_RG-containing_Sm_proteins_complex::20S_methylosome-SmD_complex::20S_methylosome_and_RG-containing_Sm_protein_complex::6S_methyltransferase_complex::JBP1-pICln_complex::SMN_complex,_U7_snRNA_specific::20S_methyltransferase_complex::AR_coactivator_complex::17S_U2_snRNP::SF3A1-SF3A2-SF3A3_complex::SF3b_complex::Exon_junction_complex::SRm160/30…	0.002	245	Spliceosome	0.0035	143	1	cyclin binding: 1.682e-06	RNA polymerase II carboxy-terminal domain kinase activity: 2.011e-06	cyclin-dependent protein serine/threonine kinase activity: 8.39e-06	protein kinase activity: 0.0007886	ATP binding: 0.0148	protein serine/threonine kinase activity: 0.06063
1028	2	P49458, Q15637,	240.25	16	15	3.2258	(E.F.G)_complex::12S_U11_snRNP::6S_methyltransferase_and_RG-containing_Sm_proteins_complex::20S_methylosome-SmD_complex::20S_methylosome_and_RG-containing_Sm_protein_complex::6S_methyltransferase_complex::JBP1-pICln_complex::SMN_complex,_U7_snRNA_specific::20S_methyltransferase_complex::AR_coactivator_complex::17S_U2_snRNP::SF3A1-SF3A2-SF3A3_complex::SF3b_complex::Exon_junction_complex::SRm160/30…	0.002	245	Spliceosome	0.0035	143	1	signal recognition particle binding: 0.0003878	7S RNA binding: 0.001114	RNA binding: 0.002461	transcription corepressor activity: 0.02697
1062	2	O00425, Q99538,	1	2	0	3	(E.F.G)_complex::12S_U11_snRNP::6S_methyltransferase_and_RG-containing_Sm_proteins_complex::20S_methylosome-SmD_complex::20S_methylosome_and_RG-containing_Sm_protein_complex::6S_methyltransferase_complex::JBP1-pICln_complex::SMN_complex,_U7_snRNA_specific::20S_methyltransferase_complex::AR_coactivator_complex::17S_U2_snRNP::SF3A1-SF3A2-SF3A3_complex::SF3b_complex::Exon_junction_complex::SRm160/30…	0.002	245	Spliceosome	0.0035	143	0	mRNA 5'-UTR binding: 0.0005331	translation regulator activity: 0.0008238	mRNA 3'-UTR binding: 0.004547	cysteine-type endopeptidase activity: 0.009937	peptidase activity: 0.01166	nucleotide binding: 0.05475	RNA binding: 0.09431
1220	2	A6NIH7, Q13242,	0	0	0	0	(E.F.G)_complex::12S_U11_snRNP::6S_methyltransferase_and_RG-containing_Sm_proteins_complex::20S_methylosome-SmD_complex::20S_methylosome_and_RG-containing_Sm_protein_complex::6S_methyltransferase_complex::JBP1-pICln_complex::SMN_complex,_U7_snRNA_specific::20S_methyltransferase_complex::AR_coactivator_complex::17S_U2_snRNP::SF3A1-SF3A2-SF3A3_complex::SF3b_complex::Exon_junction_complex::SRm160/30…	0.002	245	Spliceosome	0.0035	143	1	lipid binding: 0.01568	nucleotide binding: 0.05475	RNA binding: 0.09431
1334	2	P21127, P49756,	0	0	0	0	(E.F.G)_complex::12S_U11_snRNP::6S_methyltransferase_and_RG-containing_Sm_proteins_complex::20S_methylosome-SmD_complex::20S_methylosome_and_RG-containing_Sm_protein_complex::6S_methyltransferase_complex::JBP1-pICln_complex::SMN_complex,_U7_snRNA_specific::20S_methyltransferase_complex::AR_coactivator_complex::17S_U2_snRNP::SF3A1-SF3A2-SF3A3_complex::SF3b_complex::Exon_junction_complex::SRm160/30…	0.002	245	Spliceosome	0.0035	143	1	cyclin-dependent protein serine/threonine kinase activity: 0.005801	mRNA binding: 0.01348	protein kinase activity: 0.05461	nucleotide binding: 0.05475	protein serine/threonine kinase activity: 0.06063
1368	2	Q9UID3, Q9NYV4,	9	1	5	2	(E.F.G)_complex::12S_U11_snRNP::6S_methyltransferase_and_RG-containing_Sm_proteins_complex::20S_methylosome-SmD_complex::20S_methylosome_and_RG-containing_Sm_protein_complex::6S_methyltransferase_complex::JBP1-pICln_complex::SMN_complex,_U7_snRNA_specific::20S_methyltransferase_complex::AR_coactivator_complex::17S_U2_snRNP::SF3A1-SF3A2-SF3A3_complex::SF3b_complex::Exon_junction_complex::SRm160/30…	0.002	245	Spliceosome	0.0035	143	1	cyclin binding: 0.002615	RNA polymerase II carboxy-terminal domain kinase activity: 0.002856	cyclin-dependent protein serine/threonine kinase activity: 0.005801	protein kinase activity: 0.05461	protein serine/threonine kinase activity: 0.06063	molecular_function: 0.06358
1493	2	Q13123, Q14151,	0.25	0	1	2	(E.F.G)_complex::12S_U11_snRNP::6S_methyltransferase_and_RG-containing_Sm_proteins_complex::20S_methylosome-SmD_complex::20S_methylosome_and_RG-containing_Sm_protein_complex::6S_methyltransferase_complex::JBP1-pICln_complex::SMN_complex,_U7_snRNA_specific::20S_methyltransferase_complex::AR_coactivator_complex::17S_U2_snRNP::SF3A1-SF3A2-SF3A3_complex::SF3b_complex::Exon_junction_complex::SRm160/30…	0.002	245	Spliceosome	0.0035	143	1	identical protein binding: 0.00129	nucleotide binding: 0.05475	RNA binding: 0.09431
1570	2	Q2TAY7, O94953,	0	0	0	0	(E.F.G)_complex::12S_U11_snRNP::6S_methyltransferase_and_RG-containing_Sm_proteins_complex::20S_methylosome-SmD_complex::20S_methylosome_and_RG-containing_Sm_protein_complex::6S_methyltransferase_complex::JBP1-pICln_complex::SMN_complex,_U7_snRNA_specific::20S_methyltransferase_complex::AR_coactivator_complex::17S_U2_snRNP::SF3A1-SF3A2-SF3A3_complex::SF3b_complex::Exon_junction_complex::SRm160/30…	0.002	245	Spliceosome	0.0035	143	0	dioxygenase activity: 0.001453
1624	2	O43670, Q6PJT7,	462.25	24	19	2.4419	(E.F.G)_complex::12S_U11_snRNP::6S_methyltransferase_and_RG-containing_Sm_proteins_complex::20S_methylosome-SmD_complex::20S_methylosome_and_RG-containing_Sm_protein_complex::6S_methyltransferase_complex::JBP1-pICln_complex::SMN_complex,_U7_snRNA_specific::20S_methyltransferase_complex::AR_coactivator_complex::17S_U2_snRNP::SF3A1-SF3A2-SF3A3_complex::SF3b_complex::Exon_junction_complex::SRm160/30…	0.002	245	Spliceosome	0.0035	143	1	heparin binding: 0.01682	metal ion binding: 0.01922	RNA binding: 0.09431
1050	2	Q86V81, Q14669,	4	1	3	3.5	(E.F.G)_complex::12S_U11_snRNP::6S_methyltransferase_and_RG-containing_Sm_proteins_complex::20S_methylosome-SmD_complex::20S_methylosome_and_RG-containing_Sm_protein_complex::6S_methyltransferase_complex::JBP1-pICln_complex::SMN_complex,_U7_snRNA_specific::20S_methyltransferase_complex::AR_coactivator_complex::17S_U2_snRNP::SF3A1-SF3A2-SF3A3_complex::SF3b_complex::Exon_junction_complex::SRm160/30…	0.002	245	Splicing-associated factors complex	0.1	5	1	thyroid hormone receptor binding: 0.003823	ubiquitin-protein ligase activity: 0.035	nucleotide binding: 0.05475	RNA binding: 0.09431
1051	2	Q9P2L0, Q86V81,	0	0	0	0	(E.F.G)_complex::12S_U11_snRNP::6S_methyltransferase_and_RG-containing_Sm_proteins_complex::20S_methylosome-SmD_complex::20S_methylosome_and_RG-containing_Sm_protein_complex::6S_methyltransferase_complex::JBP1-pICln_complex::SMN_complex,_U7_snRNA_specific::20S_methyltransferase_complex::AR_coactivator_complex::17S_U2_snRNP::SF3A1-SF3A2-SF3A3_complex::SF3b_complex::Exon_junction_complex::SRm160/30…	0.002	245	Splicing-associated factors complex	0.1	5	0	nucleotide binding: 0.05475	RNA binding: 0.09431
886	2	Q99757, P08621,	4	4	0	2	(E.F.G)_complex::12S_U11_snRNP::6S_methyltransferase_and_RG-containing_Sm_proteins_complex::20S_methylosome-SmD_complex::20S_methylosome_and_RG-containing_Sm_protein_complex::6S_methyltransferase_complex::JBP1-pICln_complex::SMN_complex,_U7_snRNA_specific::20S_methyltransferase_complex::AR_coactivator_complex::17S_U2_snRNP::SF3A1-SF3A2-SF3A3_complex::SF3b_complex::Exon_junction_complex::SRm160/30…	0.002	245	SRm160/300 complex	0.1	5	0	protein disulfide oxidoreductase activity: 0.004498	protein complex binding: 0.02053	nucleotide binding: 0.05475	RNA binding: 0.09431
1437	2	O75940, Q7KZF4,	0	0	0	0	(E.F.G)_complex::12S_U11_snRNP::6S_methyltransferase_and_RG-containing_Sm_proteins_complex::20S_methylosome-SmD_complex::20S_methylosome_and_RG-containing_Sm_protein_complex::6S_methyltransferase_complex::JBP1-pICln_complex::SMN_complex,_U7_snRNA_specific::20S_methyltransferase_complex::AR_coactivator_complex::17S_U2_snRNP::SF3A1-SF3A2-SF3A3_complex::SF3b_complex::Exon_junction_complex::SRm160/30…	0.002	245	STAT6-p100-RHA complex	0.1667	3	1	nuclease activity: 0.003436	hydrolase activity acting on ester bonds: 0.003484	transcription cofactor activity: 0.009121	RNA binding: 0.09431
1304	2	P10646, Q2TAY7,	0	0	0	0	(E.F.G)_complex::12S_U11_snRNP::6S_methyltransferase_and_RG-containing_Sm_proteins_complex::20S_methylosome-SmD_complex::20S_methylosome_and_RG-containing_Sm_protein_complex::6S_methyltransferase_complex::JBP1-pICln_complex::SMN_complex,_U7_snRNA_specific::20S_methyltransferase_complex::AR_coactivator_complex::17S_U2_snRNP::SF3A1-SF3A2-SF3A3_complex::SF3b_complex::Exon_junction_complex::SRm160/30…	0.002	245	TF-FVIIa-FXa-TFPI complex	0.125	4	0	endopeptidase inhibitor activity: 0.00474	serine-type endopeptidase inhibitor activity: 0.01152
1037	2	Q96FV9, Q96NB3,	0.25	1	0	2	(E.F.G)_complex::12S_U11_snRNP::6S_methyltransferase_and_RG-containing_Sm_proteins_complex::20S_methylosome-SmD_complex::20S_methylosome_and_RG-containing_Sm_protein_complex::6S_methyltransferase_complex::JBP1-pICln_complex::SMN_complex,_U7_snRNA_specific::20S_methyltransferase_complex::AR_coactivator_complex::17S_U2_snRNP::SF3A1-SF3A2-SF3A3_complex::SF3b_complex::Exon_junction_complex::SRm160/30…	0.002	245	THO complex	0.1	5	1	RNA binding: 0.09431
1582	2	Q13769, Q9UDY2,	289	16	18	2.5882	(E.F.G)_complex::12S_U11_snRNP::6S_methyltransferase_and_RG-containing_Sm_proteins_complex::20S_methylosome-SmD_complex::20S_methylosome_and_RG-containing_Sm_protein_complex::6S_methyltransferase_complex::JBP1-pICln_complex::SMN_complex,_U7_snRNA_specific::20S_methyltransferase_complex::AR_coactivator_complex::17S_U2_snRNP::SF3A1-SF3A2-SF3A3_complex::SF3b_complex::Exon_junction_complex::SRm160/30…	0.002	245	THO complex	0.1	5	1	guanylate kinase activity: 0.001405	RNA binding: 0.09431
1797	2	Q9Y2L8, Q13769,	2.25	2	1	2	(E.F.G)_complex::12S_U11_snRNP::6S_methyltransferase_and_RG-containing_Sm_proteins_complex::20S_methylosome-SmD_complex::20S_methylosome_and_RG-containing_Sm_protein_complex::6S_methyltransferase_complex::JBP1-pICln_complex::SMN_complex,_U7_snRNA_specific::20S_methyltransferase_complex::AR_coactivator_complex::17S_U2_snRNP::SF3A1-SF3A2-SF3A3_complex::SF3b_complex::Exon_junction_complex::SRm160/30…	0.002	245	THO complex	0.1	5	1	RNA binding: 0.09431
241	3	P38646, P61604, P10809,	12.25	4	3	2	(E.F.G)_complex::12S_U11_snRNP::6S_methyltransferase_and_RG-containing_Sm_proteins_complex::20S_methylosome-SmD_complex::20S_methylosome_and_RG-containing_Sm_protein_complex::6S_methyltransferase_complex::JBP1-pICln_complex::SMN_complex,_U7_snRNA_specific::20S_methyltransferase_complex::AR_coactivator_complex::17S_U2_snRNP::SF3A1-SF3A2-SF3A3_complex::SF3b_complex::Exon_junction_complex::SRm160/30…	0.0014	245	17S U2 snRNP	0.0101	33	0.666667	unfolded protein binding: 4.98e-07	chaperone binding: 3.085e-05	DNA replication origin binding: 0.001671	ATP binding: 0.001801	lipopolysaccharide binding: 0.003338	p53 binding: 0.01298	single-stranded DNA binding: 0.01597	ATPase activity: 0.03111	enzyme binding: 0.05561	protein binding: 0.07615
327	3	Q9NP97, Q14204, P63172,	21316	152	140	2.0103	(E.F.G)_complex::12S_U11_snRNP::6S_methyltransferase_and_RG-containing_Sm_proteins_complex::20S_methylosome-SmD_complex::20S_methylosome_and_RG-containing_Sm_protein_complex::6S_methyltransferase_complex::JBP1-pICln_complex::SMN_complex,_U7_snRNA_specific::20S_methyltransferase_complex::AR_coactivator_complex::17S_U2_snRNP::SF3A1-SF3A2-SF3A3_complex::SF3b_complex::Exon_junction_complex::SRm160/30…	0.0014	245	CDC5L complex	0.0111	30	1	microtubule motor activity: 0.0001039	ATPase activity coupled: 0.003483	identical protein binding: 0.00373	motor activity: 0.01647
357	3	O43237, Q9Y6G9, Q14204,	4225	62	68	2.7923	(E.F.G)_complex::12S_U11_snRNP::6S_methyltransferase_and_RG-containing_Sm_proteins_complex::20S_methylosome-SmD_complex::20S_methylosome_and_RG-containing_Sm_protein_complex::6S_methyltransferase_complex::JBP1-pICln_complex::SMN_complex,_U7_snRNA_specific::20S_methyltransferase_complex::AR_coactivator_complex::17S_U2_snRNP::SF3A1-SF3A2-SF3A3_complex::SF3b_complex::Exon_junction_complex::SRm160/30…	0.0014	245	CDC5L complex	0.0111	30	1	microtubule motor activity: 2.044e-07	ATP binding: 0.001801	ATPase activity coupled: 0.003483
413	3	Q9H9B4, Q01844, Q9H061,	342.25	17	20	2.7027	(E.F.G)_complex::12S_U11_snRNP::6S_methyltransferase_and_RG-containing_Sm_proteins_complex::20S_methylosome-SmD_complex::20S_methylosome_and_RG-containing_Sm_protein_complex::6S_methyltransferase_complex::JBP1-pICln_complex::SMN_complex,_U7_snRNA_specific::20S_methyltransferase_complex::AR_coactivator_complex::17S_U2_snRNP::SF3A1-SF3A2-SF3A3_complex::SF3b_complex::Exon_junction_complex::SRm160/30…	0.0014	245	CPSF6-EWSR1-ITCH-NUDT21-POLR2A-UBAP2L complex	0.0556	6	0	cation transmembrane transporter activity: 0.004351	calmodulin binding: 0.03701	nucleotide binding: 0.07981	molecular_function: 0.09224
332	3	P08237, P17858, Q01813,	23409	152	154	2.781	(E.F.G)_complex::12S_U11_snRNP::6S_methyltransferase_and_RG-containing_Sm_proteins_complex::20S_methylosome-SmD_complex::20S_methylosome_and_RG-containing_Sm_protein_complex::6S_methyltransferase_complex::JBP1-pICln_complex::SMN_complex,_U7_snRNA_specific::20S_methyltransferase_complex::AR_coactivator_complex::17S_U2_snRNP::SF3A1-SF3A2-SF3A3_complex::SF3b_complex::Exon_junction_complex::SRm160/30…	0.0014	245	SNW1 complex	0.0185	18	0	6-phosphofructokinase activity: 1.513e-10	fructose binding: 1.237e-06	kinase binding: 4.084e-05	fructose-6-phosphate binding: 0.0006542	ATP binding: 0.001801	metal ion binding: 0.002664	identical protein binding: 0.00373	protein C-terminus binding: 0.04224
443	3	Q9Y5M8, Q15637, Q7Z7H5,	6.25	3	2	4.2	(E.F.G)_complex::12S_U11_snRNP::6S_methyltransferase_and_RG-containing_Sm_proteins_complex::20S_methylosome-SmD_complex::20S_methylosome_and_RG-containing_Sm_protein_complex::6S_methyltransferase_complex::JBP1-pICln_complex::SMN_complex,_U7_snRNA_specific::20S_methyltransferase_complex::AR_coactivator_complex::17S_U2_snRNP::SF3A1-SF3A2-SF3A3_complex::SF3b_complex::Exon_junction_complex::SRm160/30…	0.0014	245	Spliceosome	0.0023	143	0	transcription corepressor activity: 0.0399	signal transducer activity: 0.05379	GTP binding: 0.07806
421	4	O43865, P49903, P53992, Q9H2H8,	0	0	0	0	(E.F.G)_complex::12S_U11_snRNP::6S_methyltransferase_and_RG-containing_Sm_proteins_complex::20S_methylosome-SmD_complex::20S_methylosome_and_RG-containing_Sm_protein_complex::6S_methyltransferase_complex::JBP1-pICln_complex::SMN_complex,_U7_snRNA_specific::20S_methyltransferase_complex::AR_coactivator_complex::17S_U2_snRNP::SF3A1-SF3A2-SF3A3_complex::SF3b_complex::Exon_junction_complex::SRm160/30…	0.001	245	C complex spliceosome	0.0031	80	0.8	selenide water dikinase activity: 0.0005815	adenosylhomocysteinase activity: 0.0007753	peptidyl-prolyl cis-trans isomerase activity: 0.0123	protein binding: 0.03228	protein heterodimerization activity: 0.09341
243	4	O43865, P53992, Q9H2H8, Q93008,	0	0	0	0	(E.F.G)_complex::12S_U11_snRNP::6S_methyltransferase_and_RG-containing_Sm_proteins_complex::20S_methylosome-SmD_complex::20S_methylosome_and_RG-containing_Sm_protein_complex::6S_methyltransferase_complex::JBP1-pICln_complex::SMN_complex,_U7_snRNA_specific::20S_methyltransferase_complex::AR_coactivator_complex::17S_U2_snRNP::SF3A1-SF3A2-SF3A3_complex::SF3b_complex::Exon_junction_complex::SRm160/30…	0.001	245	ITCH-FAM/USP9x complex	0.125	2	1	adenosylhomocysteinase activity: 0.0007753	co-SMAD binding: 0.005312	peptidyl-prolyl cis-trans isomerase activity: 0.0123	cysteine-type endopeptidase activity: 0.01968	ubiquitin thiolesterase activity: 0.02418	cysteine-type peptidase activity: 0.02781	protein binding: 0.03228
402	4	O43865, O00762, O15355, Q9UMY4,	0	0	0	0	(E.F.G)_complex::12S_U11_snRNP::6S_methyltransferase_and_RG-containing_Sm_proteins_complex::20S_methylosome-SmD_complex::20S_methylosome_and_RG-containing_Sm_protein_complex::6S_methyltransferase_complex::JBP1-pICln_complex::SMN_complex,_U7_snRNA_specific::20S_methyltransferase_complex::AR_coactivator_complex::17S_U2_snRNP::SF3A1-SF3A2-SF3A3_complex::SF3b_complex::Exon_junction_complex::SRm160/30…	0.001	245	Spliceosome	0.0017	143	1	adenosylhomocysteinase activity: 0.0007753	protein serine/threonine phosphatase activity: 0.01249	phosphatidylinositol binding: 0.02408	protein binding: 0.03228	ubiquitin-protein ligase activity: 0.06753
423	4	O95400, O43765, Q9NRR5, O43865,	0	0	0	0	(E.F.G)_complex::12S_U11_snRNP::6S_methyltransferase_and_RG-containing_Sm_proteins_complex::20S_methylosome-SmD_complex::20S_methylosome_and_RG-containing_Sm_protein_complex::6S_methyltransferase_complex::JBP1-pICln_complex::SMN_complex,_U7_snRNA_specific::20S_methyltransferase_complex::AR_coactivator_complex::17S_U2_snRNP::SF3A1-SF3A2-SF3A3_complex::SF3b_complex::Exon_junction_complex::SRm160/30…	0.001	245	Spliceosome	0.0017	143	1	adenosylhomocysteinase activity: 0.0007753	ribonucleoprotein complex binding: 0.005793	polyubiquitin binding: 0.005985	protein binding: 0.03228
444	4	Q93045, O43865, O15355, Q92783,	0	0	0	0	(E.F.G)_complex::12S_U11_snRNP::6S_methyltransferase_and_RG-containing_Sm_proteins_complex::20S_methylosome-SmD_complex::20S_methylosome_and_RG-containing_Sm_protein_complex::6S_methyltransferase_complex::JBP1-pICln_complex::SMN_complex,_U7_snRNA_specific::20S_methyltransferase_complex::AR_coactivator_complex::17S_U2_snRNP::SF3A1-SF3A2-SF3A3_complex::SF3b_complex::Exon_junction_complex::SRm160/30…	0.001	245	Spliceosome	0.0017	143	0.666667	adenosylhomocysteinase activity: 0.0007753	protein serine/threonine phosphatase activity: 0.01249	SH3/SH2 adaptor activity: 0.01258	protein binding: 0.03228
510	5	Q96RQ3, Q14203, Q9UHR5, Q14204, Q14315,	0	0	0	0	(E.F.G)_complex::12S_U11_snRNP::6S_methyltransferase_and_RG-containing_Sm_proteins_complex::20S_methylosome-SmD_complex::20S_methylosome_and_RG-containing_Sm_protein_complex::6S_methyltransferase_complex::JBP1-pICln_complex::SMN_complex,_U7_snRNA_specific::20S_methyltransferase_complex::AR_coactivator_complex::17S_U2_snRNP::SF3A1-SF3A2-SF3A3_complex::SF3b_complex::Exon_junction_complex::SRm160/30…	0.0008	245	CDC5L complex	0.0067	30	0.875	methylcrotonoyl-CoA carboxylase activity: 0.001332	biotin binding: 0.002057	biotin carboxylase activity: 0.003987	dynein binding: 0.00483	ATPase activity coupled: 0.005791	ankyrin binding: 0.008188	protein binding: 0.01368	cytoskeletal protein binding: 0.02482	motor activity: 0.02715	microtubule motor activity: 0.02888
199	5	Q9BPX3, Q15003, O95347, Q15021, Q9NTJ3,	3080.25	51	60	3.045	13S_condensin_complex::Condensin_I-PARP-1-XRCC1_complex::Condensin_I_complex::DNA_ligase_IV-condensin_complex	0.625	8	Condensin I complex	1	5	0.888889	protein heterodimerization activity: 0.005882	protein binding: 0.01368	histone binding: 0.02249
758	2	P09874, Q9NR30,	529	20	26	2.0435	13S_condensin_complex::Condensin_I-PARP-1-XRCC1_complex::Condensin_I_complex::DNA_ligase_IV-condensin_complex	0.0625	8	CDK8-MED6-PARP1 complex	0.1667	3	0	ATP-dependent RNA helicase activity: 0.004016	NAD+ ADP-ribosyltransferase activity: 0.004305	double-stranded RNA binding: 0.004788	NAD binding: 0.006716	protein N-terminus binding: 0.01506	transcription factor binding: 0.03817	identical protein binding: 0.06927
179	5	Q16626, Q15021, Q8TCS8, Q9C005, P49790,	169	14	12	2.2308	13S_condensin_complex::Condensin_I-PARP-1-XRCC1_complex::Condensin_I_complex::DNA_ligase_IV-condensin_complex	0.025	8	Condensin I complex	0.04	5	0.75	polyribonucleotide nucleotidyltransferase activity: 0.0003635	poly(G) RNA binding: 0.0007268	protein anchor: 0.001332	miRNA binding: 0.003626	nucleocytoplasmic transporter activity: 0.00507	structural constituent of nuclear pore: 0.005551	poly(U) RNA binding: 0.005671	3'-5'-exoribonuclease activity: 0.005911	identical protein binding: 0.01156	protein binding: 0.01368	histone binding: 0.02249	transporter activity: 0.07202
27	31	O00487, O00231, O00232, P28066, P51665, O14818, P20618, Q15008, P35998, P25786, P25787, P25788, P25789, P17980, P61289, P28074, P55036, P28070, P28062, P28072, Q13200, O43242, Q99436, Q99460, P49720, P49721, P62333, P62195, P60900, P62191, P43686,	0	0	0	0	20S_proteasome::26S_proteasome::PA700-20S-PA28_complex::PA28-20S_proteasome::PA700_complex::PA28gamma-20S_proteasome::Ubiquilin-proteasome_complex	0.7258	40	PA700-20S-PA28 complex	0.7536	36	0.178484	threonine-type endopeptidase activity: 1.282e-34	ATPase activity: 2.917e-08	nucleoside-triphosphatase activity: 1.193e-07	endopeptidase activity: 3.76e-06	enzyme regulator activity: 6.86e-06	protein binding: 6.236e-05	endopeptidase activator activity: 6.493e-05	lipopolysaccharide binding: 0.0005483	thyrotropin-releasing hormone receptor binding: 0.005237	purine ribonucleoside triphosphate binding: 0.007465	peptidase activity: 0.01345	MDM2/MDM4 family protein binding: 0.01701	proteasome binding: 0.01773	TBP-class protein binding: 0.03835	metal ion binding: 0.04878	NF-kappaB binding: 0.05542	ATP binding: 0.09326	protein binding bridging: 0.09871
34	31	O00487, P51665, O00232, P28066, O75832, O14818, P20618, Q15008, P35998, P25786, P25787, P25788, P25789, P17980, P28074, P55036, P28070, P28062, P28072, Q13200, O43242, Q99436, Q99460, P49720, P62191, P62333, P62195, P60900, P49721, O00231, P43686,	0	0	0	0	20S_proteasome::26S_proteasome::PA700-20S-PA28_complex::PA28-20S_proteasome::PA700_complex::PA28gamma-20S_proteasome::Ubiquilin-proteasome_complex	0.7258	40	PA700-20S-PA28 complex	0.8065	36	0.158537	threonine-type endopeptidase activity: 1.282e-34	ATPase activity: 2.917e-08	nucleoside-triphosphatase activity: 1.193e-07	endopeptidase activity: 3.76e-06	enzyme regulator activity: 6.86e-06	protein binding: 6.236e-05	lipopolysaccharide binding: 0.0005483	thyrotropin-releasing hormone receptor binding: 0.005237	purine ribonucleoside triphosphate binding: 0.007465	endopeptidase activator activity: 0.01189	peptidase activity: 0.01345	proteasome binding: 0.01773	TBP-class protein binding: 0.03835	metal ion binding: 0.04878	NF-kappaB binding: 0.05542	ATP binding: 0.09326	protein binding bridging: 0.09871	transcription factor binding: 0.09962
42	31	O00487, P51665, O00232, P28066, P28062, O14818, P20618, Q15008, Q16401, P35998, P25786, P25787, P25788, P25789, P17980, P28074, P55036, P28070, P28072, Q13200, O43242, Q99436, Q99460, P49720, P62191, P62333, P62195, P60900, P49721, O00231, P43686,	0	0	0	0	20S_proteasome::26S_proteasome::PA700-20S-PA28_complex::PA28-20S_proteasome::PA700_complex::PA28gamma-20S_proteasome::Ubiquilin-proteasome_complex	0.7258	40	PA700-20S-PA28 complex	0.8065	36	0.178484	threonine-type endopeptidase activity: 1.282e-34	ATPase activity: 2.917e-08	nucleoside-triphosphatase activity: 1.193e-07	endopeptidase activity: 3.76e-06	enzyme regulator activity: 6.86e-06	protein binding: 6.236e-05	lipopolysaccharide binding: 0.0005483	thyrotropin-releasing hormone receptor binding: 0.005237	purine ribonucleoside triphosphate binding: 0.007465	protein binding involved in protein folding: 0.009684	endopeptidase activator activity: 0.01189	peptidase activity: 0.01345	proteasome binding: 0.01773	TBP-class protein binding: 0.03835	metal ion binding: 0.04878	NF-kappaB binding: 0.05542	ATP binding: 0.09326	protein binding bridging: 0.09871
9	30	O00487, P51665, O00232, P28066, P28062, O14818, P20618, Q15008, P35998, P25786, P25787, P25788, P25789, P17980, P28074, P55036, P28070, P28072, Q13200, O43242, Q99436, Q99460, P49720, P49721, P62333, P62195, P60900, P62191, O00231, P43686,	9	4	2	2	20S_proteasome::26S_proteasome::PA700-20S-PA28_complex::PA28-20S_proteasome::PA700_complex::PA28gamma-20S_proteasome::Ubiquilin-proteasome_complex	0.7008	40	PA700-20S-PA28 complex	0.7787	36	0.153652	threonine-type endopeptidase activity: 6.623e-35	ATPase activity: 2.282e-08	nucleoside-triphosphatase activity: 1.004e-07	endopeptidase activity: 3.286e-06	enzyme regulator activity: 6.203e-06	protein binding: 0.000114	lipopolysaccharide binding: 0.0005135	thyrotropin-releasing hormone receptor binding: 0.005069	purine ribonucleoside triphosphate binding: 0.007226	endopeptidase activator activity: 0.01151	peptidase activity: 0.01266	proteasome binding: 0.01717	TBP-class protein binding: 0.03716	NF-kappaB binding: 0.05373	metal ion binding: 0.05481	ATP binding: 0.08562	protein binding bridging: 0.09586
37	31	O00487, O00231, O00232, P28066, P51665, O14818, P20618, Q15008, P67809, P35998, P25786, P25787, P25788, P25789, P17980, P28074, P55036, P28070, P28062, P28072, Q13200, O43242, Q99436, Q99460, P49720, P49721, P62333, P62195, P60900, P62191, P43686,	0	0	0	0	20S_proteasome::26S_proteasome::PA700-20S-PA28_complex::PA28-20S_proteasome::PA700_complex::PA28gamma-20S_proteasome::Ubiquilin-proteasome_complex	0.6782	40	PA700-20S-PA28 complex	0.7536	36	0.166253	threonine-type endopeptidase activity: 1.282e-34	ATPase activity: 2.917e-08	nucleoside-triphosphatase activity: 1.193e-07	endopeptidase activity: 3.76e-06	enzyme regulator activity: 6.86e-06	protein binding: 6.236e-05	lipopolysaccharide binding: 0.0005483	thyrotropin-releasing hormone receptor binding: 0.005237	purine ribonucleoside triphosphate binding: 0.007465	endopeptidase activator activity: 0.01189	peptidase activity: 0.01345	proteasome binding: 0.01773	TBP-class protein binding: 0.03835	metal ion binding: 0.04878	NF-kappaB binding: 0.05542	DNA binding: 0.07272	ATP binding: 0.09326	protein binding bridging: 0.09871
71	31	O00487, P51665, O00232, P28066, P28062, P54727, O14818, P20618, Q15008, P35998, P25786, P25787, P25788, P25789, P17980, P28074, P55036, P28070, P28072, Q13200, O43242, Q99436, Q99460, P49720, P49721, P62333, P62195, P60900, P62191, O00231, P43686,	0	0	0	0	20S_proteasome::26S_proteasome::PA700-20S-PA28_complex::PA28-20S_proteasome::PA700_complex::PA28gamma-20S_proteasome::Ubiquilin-proteasome_complex	0.6782	40	PA700-20S-PA28 complex	0.7536	36	0.153846	threonine-type endopeptidase activity: 1.282e-34	ATPase activity: 2.917e-08	nucleoside-triphosphatase activity: 1.193e-07	endopeptidase activity: 3.76e-06	enzyme regulator activity: 6.86e-06	protein binding: 6.236e-05	lipopolysaccharide binding: 0.0005483	thyrotropin-releasing hormone receptor binding: 0.005237	purine ribonucleoside triphosphate binding: 0.007465	endopeptidase activator activity: 0.01189	peptidase activity: 0.01345	proteasome binding: 0.01773	TBP-class protein binding: 0.03835	polyubiquitin binding: 0.04456	metal ion binding: 0.04878	NF-kappaB binding: 0.05542	ATP binding: 0.09326	protein binding bridging: 0.09871
113	31	O00487, P51665, O00232, P28066, P28062, P54578, O14818, P20618, Q15008, P35998, P25786, P25787, P25788, P25789, P17980, P28074, P55036, P28070, P28072, Q13200, O43242, Q99436, Q99460, P49720, P49721, P62333, P62195, P60900, P62191, O00231, P43686,	0	0	0	0	20S_proteasome::26S_proteasome::PA700-20S-PA28_complex::PA28-20S_proteasome::PA700_complex::PA28gamma-20S_proteasome::Ubiquilin-proteasome_complex	0.6782	40	PA700-20S-PA28 complex	0.7536	36	0.158809	threonine-type endopeptidase activity: 1.282e-34	ATPase activity: 2.917e-08	nucleoside-triphosphatase activity: 1.193e-07	endopeptidase activity: 3.76e-06	enzyme regulator activity: 6.86e-06	protein binding: 6.236e-05	proteasome binding: 0.0001485	lipopolysaccharide binding: 0.0005483	tRNA guanylyltransferase activity: 0.004492	thyrotropin-releasing hormone receptor binding: 0.005237	purine ribonucleoside triphosphate binding: 0.007465	endopeptidase activator activity: 0.01189	peptidase activity: 0.01345	ubiquitin thiolesterase activity: 0.0147	TBP-class protein binding: 0.03835	metal ion binding: 0.04878	NF-kappaB binding: 0.05542	endopeptidase inhibitor activity: 0.06862	ATP binding: 0.09326	protein binding bridging: 0.09871
143	31	O00487, P51665, O00232, P28066, P28062, O14818, P20618, Q15008, P35998, P25786, P25787, P25788, P25789, P17980, P08670, P28074, P55036, P28070, P28072, Q13200, O43242, Q99436, Q99460, P49720, P49721, P62333, P62195, P60900, P62191, O00231, P43686,	169	16	10	215.462	20S_proteasome::26S_proteasome::PA700-20S-PA28_complex::PA28-20S_proteasome::PA700_complex::PA28gamma-20S_proteasome::Ubiquilin-proteasome_complex	0.6782	40	PA700-20S-PA28 complex	0.7536	36	0.16	threonine-type endopeptidase activity: 1.282e-34	ATPase activity: 2.917e-08	nucleoside-triphosphatase activity: 1.193e-07	endopeptidase activity: 3.76e-06	enzyme regulator activity: 6.86e-06	protein binding: 6.236e-05	lipopolysaccharide binding: 0.0005483	thyrotropin-releasing hormone receptor binding: 0.005237	purine ribonucleoside triphosphate binding: 0.007465	endopeptidase activator activity: 0.01189	peptidase activity: 0.01345	proteasome binding: 0.01773	structural constituent of eye lens: 0.02494	TBP-class protein binding: 0.03835	metal ion binding: 0.04878	NF-kappaB binding: 0.05542	scaffold protein binding: 0.06141	identical protein binding: 0.07479	ATP binding: 0.09326	protein binding bridging: 0.09871
178	31	O00487, P51665, O00232, P28066, P28062, O14818, P20618, Q15008, P35998, P25786, P25787, P25788, P25789, P17980, Q6NZY4, P28074, P55036, P28070, P28072, Q13200, O43242, Q99436, Q99460, P49720, P49721, P62333, P62195, P60900, P62191, O00231, P43686,	9	3	3	213.333	20S_proteasome::26S_proteasome::PA700-20S-PA28_complex::PA28-20S_proteasome::PA700_complex::PA28gamma-20S_proteasome::Ubiquilin-proteasome_complex	0.6782	40	PA700-20S-PA28 complex	0.7536	36	0.162095	threonine-type endopeptidase activity: 1.282e-34	ATPase activity: 2.917e-08	nucleoside-triphosphatase activity: 1.193e-07	endopeptidase activity: 3.76e-06	enzyme regulator activity: 6.86e-06	protein binding: 6.236e-05	lipopolysaccharide binding: 0.0005483	thyrotropin-releasing hormone receptor binding: 0.005237	purine ribonucleoside triphosphate binding: 0.007465	endopeptidase activator activity: 0.01189	peptidase activity: 0.01345	proteasome binding: 0.01773	TBP-class protein binding: 0.03835	metal ion binding: 0.04878	NF-kappaB binding: 0.05542	ATP binding: 0.09326	protein binding bridging: 0.09871
212	31	O00487, P51665, O00232, P28066, P28062, O14818, Q9Y3D3, P20618, Q15008, P35998, P25786, P25787, P25788, P25789, P17980, P28074, P55036, P28070, P28072, Q13200, O43242, Q99436, Q99460, P49720, P62191, P62333, P62195, P60900, P49721, O00231, P43686,	0.25	1	0	204	20S_proteasome::26S_proteasome::PA700-20S-PA28_complex::PA28-20S_proteasome::PA700_complex::PA28gamma-20S_proteasome::Ubiquilin-proteasome_complex	0.6782	40	PA700-20S-PA28 complex	0.7536	36	0.162095	threonine-type endopeptidase activity: 1.282e-34	ATPase activity: 2.917e-08	nucleoside-triphosphatase activity: 1.193e-07	endopeptidase activity: 3.76e-06	enzyme regulator activity: 6.86e-06	protein binding: 6.236e-05	lipopolysaccharide binding: 0.0005483	thyrotropin-releasing hormone receptor binding: 0.005237	purine ribonucleoside triphosphate binding: 0.007465	endopeptidase activator activity: 0.01189	peptidase activity: 0.01345	proteasome binding: 0.01773	TBP-class protein binding: 0.03835	metal ion binding: 0.04878	NF-kappaB binding: 0.05542	ATP binding: 0.09326	protein binding bridging: 0.09871
308	31	O00487, P51665, O00232, P28066, P28062, O14818, P20618, Q15008, P35998, P25786, P25787, P25788, P25789, P31948, P17980, P28074, P55036, P28070, P28072, Q13200, O43242, Q99436, Q99460, P49720, P49721, P62333, P62195, P60900, P62191, O00231, P43686,	182.25	8	19	229.518	20S_proteasome::26S_proteasome::PA700-20S-PA28_complex::PA28-20S_proteasome::PA700_complex::PA28gamma-20S_proteasome::Ubiquilin-proteasome_complex	0.6782	40	PA700-20S-PA28 complex	0.7536	36	0.155388	threonine-type endopeptidase activity: 1.282e-34	ATPase activity: 2.917e-08	nucleoside-triphosphatase activity: 1.193e-07	endopeptidase activity: 3.76e-06	enzyme regulator activity: 6.86e-06	protein binding: 6.236e-05	lipopolysaccharide binding: 0.0005483	thyrotropin-releasing hormone receptor binding: 0.005237	purine ribonucleoside triphosphate binding: 0.007465	endopeptidase activator activity: 0.01189	peptidase activity: 0.01345	proteasome binding: 0.01773	Hsp70 protein binding: 0.02351	TBP-class protein binding: 0.03835	metal ion binding: 0.04878	NF-kappaB binding: 0.05542	chaperone binding: 0.09078	ATP binding: 0.09326	protein binding bridging: 0.09871
310	31	O00487, P51665, O00232, P28066, P28062, O14818, P20618, Q15008, P35998, P25786, O95905, P25788, P25789, P17980, P28074, P55036, P28070, P28072, Q13200, O43242, P25787, Q99436, Q99460, P49720, P49721, P62333, P62195, P60900, P62191, O00231, P43686,	2.25	2	1	243.667	20S_proteasome::26S_proteasome::PA700-20S-PA28_complex::PA28-20S_proteasome::PA700_complex::PA28gamma-20S_proteasome::Ubiquilin-proteasome_complex	0.6782	40	PA700-20S-PA28 complex	0.7536	36	0.16	threonine-type endopeptidase activity: 1.282e-34	ATPase activity: 2.917e-08	nucleoside-triphosphatase activity: 1.193e-07	endopeptidase activity: 3.76e-06	enzyme regulator activity: 6.86e-06	protein binding: 6.236e-05	lipopolysaccharide binding: 0.0005483	thyrotropin-releasing hormone receptor binding: 0.005237	purine ribonucleoside triphosphate binding: 0.007465	endopeptidase activator activity: 0.01189	peptidase activity: 0.01345	proteasome binding: 0.01773	TBP-class protein binding: 0.03835	metal ion binding: 0.04878	NF-kappaB binding: 0.05542	transcription coactivator activity: 0.07679	ATP binding: 0.09326	protein binding bridging: 0.09871
340	31	O00487, P51665, O00232, P28066, P28062, O14818, P20618, Q15008, P35998, P25786, P25787, P25788, P25789, P17980, P28074, P55036, P28070, P28072, Q13200, O43242, Q99436, Q99460, P49720, P49721, P62333, P62195, P60900, Q9Y5K5, P62191, O00231, P43686,	72.25	11	6	231.294	20S_proteasome::26S_proteasome::PA700-20S-PA28_complex::PA28-20S_proteasome::PA700_complex::PA28gamma-20S_proteasome::Ubiquilin-proteasome_complex	0.6782	40	PA700-20S-PA28 complex	0.7536	36	0.157895	threonine-type endopeptidase activity: 1.282e-34	ATPase activity: 2.917e-08	nucleoside-triphosphatase activity: 1.193e-07	endopeptidase activity: 3.76e-06	enzyme regulator activity: 6.86e-06	protein binding: 6.236e-05	proteasome binding: 0.0001485	lipopolysaccharide binding: 0.0005483	thyrotropin-releasing hormone receptor binding: 0.005237	purine ribonucleoside triphosphate binding: 0.007465	endopeptidase activator activity: 0.01189	peptidase activity: 0.01345	ubiquitin thiolesterase activity: 0.0147	TBP-class protein binding: 0.03835	omega peptidase activity: 0.04319	metal ion binding: 0.04878	NF-kappaB binding: 0.05542	endopeptidase inhibitor activity: 0.06862	ATP binding: 0.09326	protein binding bridging: 0.09871
354	31	O00487, O00231, O00232, P28066, P51665, O14818, P20618, Q15008, P35998, P25786, P25787, P25788, P25789, P17980, P55072, P28074, P55036, P28070, P28062, P28072, Q13200, O43242, Q99436, Q99460, P49720, P62191, P62333, P62195, P60900, P49721, P43686,	3540.25	60	59	233.891	20S_proteasome::26S_proteasome::PA700-20S-PA28_complex::PA28-20S_proteasome::PA700_complex::PA28gamma-20S_proteasome::Ubiquilin-proteasome_complex	0.6782	40	PA700-20S-PA28 complex	0.7536	36	0.152882	threonine-type endopeptidase activity: 1.282e-34	ATPase activity: 9.223e-10	nucleoside-triphosphatase activity: 1.193e-07	endopeptidase activity: 3.76e-06	enzyme regulator activity: 6.86e-06	protein binding: 6.236e-05	lipopolysaccharide binding: 0.0005483	thyrotropin-releasing hormone receptor binding: 0.005237	purine ribonucleoside triphosphate binding: 0.007465	endopeptidase activator activity: 0.01189	peptidase activity: 0.01345	proteasome binding: 0.01773	TBP-class protein binding: 0.03835	polyubiquitin binding: 0.04456	ATP binding: 0.04612	metal ion binding: 0.04878	NF-kappaB binding: 0.05542	protein binding bridging: 0.09871
427	31	O00487, P51665, O00232, P28066, P28062, O14818, P20618, Q15008, P35998, P25786, P25787, P25788, Q99460, P17980, P25789, P28074, P55036, P28070, P28072, Q13200, O43242, Q99436, P49720, P62191, P62333, P62195, P60900, P49721, O00231, P43686, Q9NYU2,	576	14	34	198.729	20S_proteasome::26S_proteasome::PA700-20S-PA28_complex::PA28-20S_proteasome::PA700_complex::PA28gamma-20S_proteasome::Ubiquilin-proteasome_complex	0.6782	40	PA700-20S-PA28 complex	0.7536	36	0.152882	threonine-type endopeptidase activity: 1.282e-34	ATPase activity: 2.917e-08	nucleoside-triphosphatase activity: 1.193e-07	endopeptidase activity: 3.76e-06	enzyme regulator activity: 6.86e-06	protein binding: 0.0002545	lipopolysaccharide binding: 0.0005483	UDP-glucose:glycoprotein glucosyltransferase activity: 0.004492	thyrotropin-releasing hormone receptor binding: 0.005237	purine ribonucleoside triphosphate binding: 0.007465	endopeptidase activator activity: 0.01189	peptidase activity: 0.01345	proteasome binding: 0.01773	TBP-class protein binding: 0.03835	metal ion binding: 0.04878	NF-kappaB binding: 0.05542	ATP binding: 0.09326	protein binding bridging: 0.09871
452	31	O00487, P51665, O00232, P28066, P28062, O14818, P20618, O00231, Q8TAA3, P25786, P25787, P25788, P25789, P17980, Q15008, P28074, P55036, P28070, P28072, Q13200, P35998, O43242, Q99436, Q99460, P49720, P49721, P62333, P62195, P60900, P62191, P43686,	0.25	0	1	282	20S_proteasome::26S_proteasome::PA700-20S-PA28_complex::PA28-20S_proteasome::PA700_complex::PA28gamma-20S_proteasome::Ubiquilin-proteasome_complex	0.6782	40	PA700-20S-PA28 complex	0.7536	36	0.153465	threonine-type endopeptidase activity: 1.681e-37	ATPase activity: 2.917e-08	endopeptidase activity: 6.77e-08	nucleoside-triphosphatase activity: 1.193e-07	enzyme regulator activity: 6.86e-06	protein binding: 0.0002545	lipopolysaccharide binding: 0.0005483	thyrotropin-releasing hormone receptor binding: 0.005237	purine ribonucleoside triphosphate binding: 0.007465	endopeptidase activator activity: 0.01189	peptidase activity: 0.01345	proteasome binding: 0.01773	TBP-class protein binding: 0.03835	metal ion binding: 0.04878	NF-kappaB binding: 0.05542	ATP binding: 0.09326	protein binding bridging: 0.09871
543	31	O00487, P51665, O00232, P28066, P28062, O14818, P20618, O00231, P35998, P25786, P25787, P25788, P25789, Q15008, P17980, P40306, P28074, P55036, P28070, P28072, Q13200, O43242, Q99436, Q99460, P49720, P49721, P62333, P62195, P60900, P62191, P43686,	0	0	0	0	20S_proteasome::26S_proteasome::PA700-20S-PA28_complex::PA28-20S_proteasome::PA700_complex::PA28gamma-20S_proteasome::Ubiquilin-proteasome_complex	0.6782	40	PA700-20S-PA28 complex	0.7536	36	0.1525	threonine-type endopeptidase activity: 1.681e-37	ATPase activity: 2.917e-08	nucleoside-triphosphatase activity: 1.193e-07	endopeptidase activity: 3.76e-06	enzyme regulator activity: 6.86e-06	protein binding: 0.0002545	lipopolysaccharide binding: 0.0005483	thyrotropin-releasing hormone receptor binding: 0.005237	purine ribonucleoside triphosphate binding: 0.007465	endopeptidase activator activity: 0.01189	peptidase activity: 0.01345	proteasome binding: 0.01773	TBP-class protein binding: 0.03835	metal ion binding: 0.04878	NF-kappaB binding: 0.05542	ATP binding: 0.09326	protein binding bridging: 0.09871
771	2	P98179, O14818,	0.25	0	1	2	20S_proteasome::26S_proteasome::PA700-20S-PA28_complex::PA28-20S_proteasome::PA700_complex::PA28gamma-20S_proteasome::Ubiquilin-proteasome_complex	0.0125	40	20S proteasome	0.0357	14	1	ribosomal large subunit binding: 0.0001939	threonine-type endopeptidase activity: 0.00334	nucleotide binding: 0.05475	identical protein binding: 0.06927	RNA binding: 0.09431
1041	2	P28074, P28065,	0	0	0	0	20S_proteasome::26S_proteasome::PA700-20S-PA28_complex::PA28-20S_proteasome::PA700_complex::PA28gamma-20S_proteasome::Ubiquilin-proteasome_complex	0.0125	40	20S proteasome	0.0357	14	0	threonine-type endopeptidase activity: 2.757e-06
1201	2	P49721, P15328,	0	0	0	0	20S_proteasome::26S_proteasome::PA700-20S-PA28_complex::PA28-20S_proteasome::PA700_complex::PA28gamma-20S_proteasome::Ubiquilin-proteasome_complex	0.0125	40	20S proteasome	0.0357	14	0	folic acid transporter activity: 0.001163	folic acid binding: 0.00126	threonine-type endopeptidase activity: 0.00334	receptor activity: 0.02612
1262	2	P49721, Q16762,	1	1	1	2.5	20S_proteasome::26S_proteasome::PA700-20S-PA28_complex::PA28-20S_proteasome::PA700_complex::PA28gamma-20S_proteasome::Ubiquilin-proteasome_complex	0.0125	40	20S proteasome	0.0357	14	0	5S rRNA binding: 0.0002908	thiosulfate sulfurtransferase activity: 0.0002908	threonine-type endopeptidase activity: 0.00334
789	2	Q9UPN3, Q16401,	0	0	0	0	20S_proteasome::26S_proteasome::PA700-20S-PA28_complex::PA28-20S_proteasome::PA700_complex::PA28gamma-20S_proteasome::Ubiquilin-proteasome_complex	0.0125	40	PA700 complex	0.025	20	1	protein binding involved in protein folding: 0.00063	actin filament binding: 0.01611	ATPase activity: 0.02096	microtubule binding: 0.02536	actin binding: 0.05292	calcium ion binding: 0.09204
990	2	P43686, P61163,	2.25	1	2	2	20S_proteasome::26S_proteasome::PA700-20S-PA28_complex::PA28-20S_proteasome::PA700_complex::PA28gamma-20S_proteasome::Ubiquilin-proteasome_complex	0.0125	40	PA700 complex	0.025	20	0	ATP binding: 0.0148	ATPase activity: 0.02096
1009	2	P55036, O43399,	0	0	0	0	20S_proteasome::26S_proteasome::PA700-20S-PA28_complex::PA28-20S_proteasome::PA700_complex::PA28gamma-20S_proteasome::Ubiquilin-proteasome_complex	0.0125	40	PA700 complex	0.025	20	1	identical protein binding: 0.06927	protein homodimerization activity: 0.08226
1010	2	P55036, P25815,	0	0	0	0	20S_proteasome::26S_proteasome::PA700-20S-PA28_complex::PA28-20S_proteasome::PA700_complex::PA28gamma-20S_proteasome::Ubiquilin-proteasome_complex	0.0125	40	PA700 complex	0.025	20	1	calcium-dependent protein binding: 0.00662	magnesium ion binding: 0.03026	identical protein binding: 0.06927	calcium ion binding: 0.09204
1054	2	Q8WVJ2, O00233,	12.25	2	5	2.4286	20S_proteasome::26S_proteasome::PA700-20S-PA28_complex::PA28-20S_proteasome::PA700_complex::PA28gamma-20S_proteasome::Ubiquilin-proteasome_complex	0.0125	40	PA700 complex	0.025	20	1	bHLH transcription factor binding: 0.003098	transcription coactivator activity: 0.03209
1176	2	P13797, Q15008,	9	3	3	2.1667	20S_proteasome::26S_proteasome::PA700-20S-PA28_complex::PA28-20S_proteasome::PA700_complex::PA28gamma-20S_proteasome::Ubiquilin-proteasome_complex	0.0125	40	PA700 complex	0.025	20	0	ATPase activity: 0.02096	actin binding: 0.05292	calcium ion binding: 0.09204
903	2	P55957, Q9UHD9,	1	0	2	3.5	20S_proteasome::26S_proteasome::PA700-20S-PA28_complex::PA28-20S_proteasome::PA700_complex::PA28gamma-20S_proteasome::Ubiquilin-proteasome_complex	0.0125	40	Ubiquilin-proteasome complex	0.0833	6	1	death receptor binding: 0.001018	ubiquitin protein ligase binding: 0.0256
1258	2	P17028, P25787,	90.25	10	9	2.6316	20S_proteasome::26S_proteasome::PA700-20S-PA28_complex::PA28-20S_proteasome::PA700_complex::PA28gamma-20S_proteasome::Ubiquilin-proteasome_complex	0.0125	40	Ubiquilin-proteasome complex	0.0833	6	0	threonine-type endopeptidase activity: 0.00334	endopeptidase activity: 0.006812	sequence-specific DNA binding: 0.06516
1383	2	Q9UMX0, Q8IWB7,	0	0	0	0	20S_proteasome::26S_proteasome::PA700-20S-PA28_complex::PA28-20S_proteasome::PA700_complex::PA28gamma-20S_proteasome::Ubiquilin-proteasome_complex	0.0125	40	Ubiquilin-proteasome complex	0.0833	6	0	1-phosphatidylinositol binding: 0.004064	kinase binding: 0.00739
1480	2	Q9Y5L0, Q05086,	30.25	7	4	2.4545	20S_proteasome::26S_proteasome::PA700-20S-PA28_complex::PA28-20S_proteasome::PA700_complex::PA28gamma-20S_proteasome::Ubiquilin-proteasome_complex	0.0125	40	Ubiquilin-proteasome complex	0.0833	6	1	receptor activity: 0.02612	transcription coactivator activity: 0.03209	ubiquitin-protein ligase activity: 0.035
1678	14	O95218, O43865, Q9UHD9, O00762, O94888, Q93008, Q70CQ2, P63146, Q9UMX0, O95155, O60232, Q92783, Q16864, P15374,	0	0	0	0	20S_proteasome::26S_proteasome::PA700-20S-PA28_complex::PA28-20S_proteasome::PA700_complex::PA28gamma-20S_proteasome::Ubiquilin-proteasome_complex	0.0071	40	Ubiquilin-proteasome complex	0.0476	6	0.796875	protein binding: 6.026e-06	ubiquitin thiolesterase activity: 7.851e-05	ATPase activity uncoupled: 0.0003394	ubiquitin binding: 0.00119	cysteine-type endopeptidase activity: 0.002128	adenosylhomocysteinase activity: 0.002709	cysteine-type peptidase activity: 0.004202	ubiquitin-ubiquitin ligase activity: 0.00842	ubiquitin protein ligase binding: 0.01307	proton-transporting ATPase activity rotational mechanism: 0.01671	co-SMAD binding: 0.01835	ubiquitin-protein ligase activity: 0.02326	hydrogen ion transmembrane transporter activity: 0.0313	acid-amino acid ligase activity: 0.03891	SH3/SH2 adaptor activity: 0.04267	kinase binding: 0.04949	ubiquitin-specific protease activity: 0.06134	peptidase activity: 0.0761
146	16	O95218, O43865, Q9UHD9, O00762, P63146, Q93008, Q70CQ2, Q15819, Q9UMX0, Q04323, O95155, O60232, O94888, Q99614, P68036, P15374,	1	2	0	235.5	20S_proteasome::26S_proteasome::PA700-20S-PA28_complex::PA28-20S_proteasome::PA700_complex::PA28gamma-20S_proteasome::Ubiquilin-proteasome_complex	0.0063	40	Ubiquilin-proteasome complex	0.0417	6	0.8	protein binding: 1.082e-06	ubiquitin binding: 2.671e-05	ubiquitin protein ligase binding: 4.357e-05	ubiquitin thiolesterase activity: 0.0001193	K6-linked polyubiquitin binding: 0.0003878	acid-amino acid ligase activity: 0.0009515	ubiquitin-protein ligase activity: 0.002499	cysteine-type endopeptidase activity: 0.002778	adenosylhomocysteinase activity: 0.003095	cysteine-type peptidase activity: 0.005463	ubiquitin-ubiquitin ligase activity: 0.009612	co-SMAD binding: 0.02092	polyubiquitin binding: 0.02352	ATPase binding: 0.03015	enzyme binding: 0.03392	kinase binding: 0.05614	ubiquitin-specific protease activity: 0.06946	peptidase activity: 0.08596
229	4	P55060, P49459, Q9UMX0, P15374,	0	0	0	0	20S_proteasome::26S_proteasome::PA700-20S-PA28_complex::PA28-20S_proteasome::PA700_complex::PA28gamma-20S_proteasome::Ubiquilin-proteasome_complex	0.0063	40	Ubiquilin-proteasome complex	0.0417	6	0.6	importin-alpha export receptor activity: 0.0001939	Ran GTPase binding: 0.01001	kinase binding: 0.01467	ubiquitin binding: 0.01467	peptidase activity: 0.02305	ubiquitin thiolesterase activity: 0.02418	cysteine-type peptidase activity: 0.02781	protein binding: 0.03228	ubiquitin protein ligase binding: 0.04988	ubiquitin-protein ligase activity: 0.06753
395	4	P78318, P31949, Q9UHD9, Q92783,	56.25	5	10	2	20S_proteasome::26S_proteasome::PA700-20S-PA28_complex::PA28-20S_proteasome::PA700_complex::PA28gamma-20S_proteasome::Ubiquilin-proteasome_complex	0.0063	40	Ubiquilin-proteasome complex	0.0417	6	0.6	S100 protein binding: 0.00242	mitogen-activated protein kinase kinase binding: 0.003289	protein phosphatase type 2A regulator activity: 0.006369	SH3/SH2 adaptor activity: 0.01258	calcium-dependent protein binding: 0.01315	protein binding: 0.03228
1653	64	P62851, P30050, P62854, P62857, P50914, Q07020, P05388, P62979, P39019, P18621, Q12906, O00567, P62424, P61513, P62913, P62280, Q02543, P22087, P62753, Q8IY81, P62241, P52272, P25398, P62899, P46782, P62081, P62266, P55769, Q9Y2X3, P36578, P62244, P62263, Q71UM5, P62249, P62917, Q96L21, P26373, P32969, P62906, P39023, P83731, P46777, P23396, P61313, P46778, P84098, P35268, P15880, P08708, P61247,…	462.25	20	23	252.023	40S_ribosomal_subunit,_cytoplasmic::Nop56p-associated_pre-rRNA_complex::TRBP_containing_complex_(DICER,_RPL7A,_EIF6,_MOV10_and_subunits_of_the_60S_ribosomal_particle)::DICER1-NCOA6-AGO2_complex::RNA-induced_silencing_complex,_RISC::TRBP_containing_complex_(DICER,_TRBP,_AGO2,_RPL7A,_EIF6,_MOV10)::FIB-associated_protein_complex	0.436	129	Ribosome, cytoplasmic	0.5419	81	0.830398	structural constituent of ribosome: 1.303e-99	RNA binding: 1.097e-34	rRNA binding: 1.003e-09	mRNA binding: 4.718e-06	snoRNA binding: 1.389e-05	fibroblast growth factor binding: 0.006975	laminin receptor activity: 0.009237	5S rRNA binding: 0.009237	metal ion binding: 0.01231	mRNA 5'-UTR binding: 0.01681	DNA binding: 0.02485	translation regulator activity: 0.02574	protein binding: 0.03343	translation initiation factor binding: 0.04734	protein kinase A binding: 0.05571	translation activator activity: 0.05709	DNA N-glycosylase activity: 0.05983	DNA-(apurinic or apyrimidinic site) lyase activity: 0.06796	methyltransferase activity: 0.07304	cysteine-type endopeptidase activator activity involved in apoptotic process: 0.07725	laminin binding: 0.07987	iron-sulfur cluster binding: 0.09896
26	62	P62851, P30050, P62854, P62857, P50914, P62899, P05388, P62979, P39019, P18621, Q12906, P62910, P62424, P61513, P62913, P62280, Q02543, P46777, P62753, P62750, P52272, P25398, P55769, P46782, P62081, P62266, P62241, P36578, P62244, P62263, Q71UM5, P62249, P62917, P62277, P26373, P32969, P62906, P39023, P83731, P22087, P23396, P61313, P46778, P84098, P35268, P15880, P08708, P61247, P08865, P18124,…	36	7	5	248	40S_ribosomal_subunit,_cytoplasmic::Nop56p-associated_pre-rRNA_complex::TRBP_containing_complex_(DICER,_RPL7A,_EIF6,_MOV10_and_subunits_of_the_60S_ribosomal_particle)::DICER1-NCOA6-AGO2_complex::RNA-induced_silencing_complex,_RISC::TRBP_containing_complex_(DICER,_TRBP,_AGO2,_RPL7A,_EIF6,_MOV10)::FIB-associated_protein_complex	0.4352	129	Ribosome, cytoplasmic	0.5806	81	0.836735	structural constituent of ribosome: 2.142e-104	RNA binding: 5.72e-34	rRNA binding: 8.249e-10	mRNA binding: 3.92e-06	fibroblast growth factor binding: 0.006568	laminin receptor activity: 0.008951	5S rRNA binding: 0.008951	metal ion binding: 0.01506	mRNA 5'-UTR binding: 0.01629	translation regulator activity: 0.02495	DNA binding: 0.0294	snoRNA binding: 0.04319	translation initiation factor binding: 0.04593	protein kinase A binding: 0.05406	translation activator activity: 0.0554	DNA N-glycosylase activity: 0.05807	protein binding: 0.06424	DNA-(apurinic or apyrimidinic site) lyase activity: 0.06598	cysteine-type endopeptidase activator activity involved in apoptotic process: 0.07503	laminin binding: 0.07758	iron-sulfur cluster binding: 0.09619
95	62	P62851, P30050, P62854, P62857, P50914, P05388, P62979, P39019, P18621, Q12906, O00567, P62424, O76021, P61513, P62913, P62280, Q02543, P46777, P62753, P62750, P62241, P52272, P25398, P62899, P46782, P62081, P62266, P55769, P36578, P62244, P62263, Q71UM5, P62249, P62917, P62277, P32969, P62906, P39023, P83731, P22087, P23396, P61313, P46778, P84098, P35268, P15880, P08708, P61247, P08865, P18124,…	702.25	30	23	249.623	40S_ribosomal_subunit,_cytoplasmic::Nop56p-associated_pre-rRNA_complex::TRBP_containing_complex_(DICER,_RPL7A,_EIF6,_MOV10_and_subunits_of_the_60S_ribosomal_particle)::DICER1-NCOA6-AGO2_complex::RNA-induced_silencing_complex,_RISC::TRBP_containing_complex_(DICER,_TRBP,_AGO2,_RPL7A,_EIF6,_MOV10)::FIB-associated_protein_complex	0.4352	129	Ribosome, cytoplasmic	0.5593	81	0.833777	structural constituent of ribosome: 1.85e-101	RNA binding: 5.317e-37	rRNA binding: 8.249e-10	mRNA binding: 3.92e-06	snoRNA binding: 0.000928	fibroblast growth factor binding: 0.006568	laminin receptor activity: 0.008951	5S rRNA binding: 0.008951	metal ion binding: 0.01506	mRNA 5'-UTR binding: 0.01629	translation regulator activity: 0.02495	DNA binding: 0.0294	translation initiation factor binding: 0.04593	protein kinase A binding: 0.05406	translation activator activity: 0.0554	DNA N-glycosylase activity: 0.05807	protein binding: 0.06424	DNA-(apurinic or apyrimidinic site) lyase activity: 0.06598	cysteine-type endopeptidase activator activity involved in apoptotic process: 0.07503	laminin binding: 0.07758	iron-sulfur cluster binding: 0.09619
12	61	P62851, P18621, P50914, P62857, P05388, Q9Y3U8, P39019, P46782, P62910, P39023, P62424, P46776, P30050, P62913, P62280, Q02543, P62917, P62753, P62750, P52272, P25398, P62899, P62277, P26373, P62266, P62241, P36578, P62244, P62263, Q71UM5, P62249, Q96L21, P32969, P62906, P62979, P83731, P46777, P23396, P61313, P46778, P84098, P35268, P15880, P08708, P61247, Q12906, P08865, P18124, P62829, P62701,…	0.25	1	0	211	40S_ribosomal_subunit,_cytoplasmic::Nop56p-associated_pre-rRNA_complex::TRBP_containing_complex_(DICER,_RPL7A,_EIF6,_MOV10_and_subunits_of_the_60S_ribosomal_particle)::DICER1-NCOA6-AGO2_complex::RNA-induced_silencing_complex,_RISC::TRBP_containing_complex_(DICER,_TRBP,_AGO2,_RPL7A,_EIF6,_MOV10)::FIB-associated_protein_complex	0.4275	129	Ribosome, cytoplasmic	0.6347	81	0.841931	structural constituent of ribosome: 7.351e-112	RNA binding: 7.185e-33	rRNA binding: 7.462e-10	mRNA binding: 3.565e-06	fibroblast growth factor binding: 0.006368	laminin receptor activity: 0.008807	5S rRNA binding: 0.008807	mRNA 5'-UTR binding: 0.01603	metal ion binding: 0.01664	translation regulator activity: 0.02456	DNA binding: 0.03193	translation initiation factor binding: 0.04523	protein kinase A binding: 0.05324	translation activator activity: 0.05456	DNA N-glycosylase activity: 0.05719	DNA-(apurinic or apyrimidinic site) lyase activity: 0.06499	cysteine-type endopeptidase activator activity involved in apoptotic process: 0.07391	laminin binding: 0.07643	protein binding: 0.08762	iron-sulfur cluster binding: 0.0948
23	61	P62851, P30050, P50914, P62857, Q07020, P05388, P62979, P39019, P18621, Q12906, P62910, P84098, P62424, P61513, P62913, P62280, Q02543, P46777, P05387, P62753, P62750, P52272, P25398, P62899, P46782, P26373, P62266, P62241, P36578, P62244, P62263, Q71UM5, P62249, P62917, Q96L21, P32969, P62906, P39023, P83731, P62847, P23396, P61313, P46778, P62829, P35268, P15880, P08708, P61247, P08865, P18124,…	196	14	14	228.643	40S_ribosomal_subunit,_cytoplasmic::Nop56p-associated_pre-rRNA_complex::TRBP_containing_complex_(DICER,_RPL7A,_EIF6,_MOV10_and_subunits_of_the_60S_ribosomal_particle)::DICER1-NCOA6-AGO2_complex::RNA-induced_silencing_complex,_RISC::TRBP_containing_complex_(DICER,_TRBP,_AGO2,_RPL7A,_EIF6,_MOV10)::FIB-associated_protein_complex	0.4275	129	Ribosome, cytoplasmic	0.6122	81	0.835452	structural constituent of ribosome: 1.321e-108	RNA binding: 2.328e-34	rRNA binding: 7.462e-10	mRNA binding: 3.565e-06	fibroblast growth factor binding: 0.006368	laminin receptor activity: 0.008807	5S rRNA binding: 0.008807	mRNA 5'-UTR binding: 0.01603	metal ion binding: 0.01664	translation regulator activity: 0.02456	DNA binding: 0.03193	nucleic acid binding: 0.0406	translation initiation factor binding: 0.04523	protein kinase A binding: 0.05324	translation activator activity: 0.05456	DNA N-glycosylase activity: 0.05719	nucleotide binding: 0.06441	DNA-(apurinic or apyrimidinic site) lyase activity: 0.06499	cysteine-type endopeptidase activator activity involved in apoptotic process: 0.07391	laminin binding: 0.07643	protein binding: 0.08762	iron-sulfur cluster binding: 0.0948
33	61	P62851, P18621, P62854, P62857, P50914, Q07020, P05388, P62979, P39019, Q12906, P62910, P62424, P46776, P61513, P62913, P62280, P30050, P62847, P62753, P62750, P52272, P25398, P62899, P46782, Q02543, P62266, P62241, P36578, P62244, P62263, Q71UM5, P62249, P62917, Q96L21, P32969, P62906, P39023, P83731, P46777, P23396, P61313, P46778, P62861, P62829, P35268, P15880, P08708, P61247, P08865, P18124,…	0	0	0	0	40S_ribosomal_subunit,_cytoplasmic::Nop56p-associated_pre-rRNA_complex::TRBP_containing_complex_(DICER,_RPL7A,_EIF6,_MOV10_and_subunits_of_the_60S_ribosomal_particle)::DICER1-NCOA6-AGO2_complex::RNA-induced_silencing_complex,_RISC::TRBP_containing_complex_(DICER,_TRBP,_AGO2,_RPL7A,_EIF6,_MOV10)::FIB-associated_protein_complex	0.4275	129	Ribosome, cytoplasmic	0.6347	81	0.842667	structural constituent of ribosome: 7.351e-112	RNA binding: 2.328e-34	rRNA binding: 7.462e-10	mRNA binding: 3.565e-06	fibroblast growth factor binding: 0.006368	laminin receptor activity: 0.008807	5S rRNA binding: 0.008807	mRNA 5'-UTR binding: 0.01603	metal ion binding: 0.01664	translation regulator activity: 0.02456	DNA binding: 0.03193	translation initiation factor binding: 0.04523	protein kinase A binding: 0.05324	translation activator activity: 0.05456	DNA N-glycosylase activity: 0.05719	DNA-(apurinic or apyrimidinic site) lyase activity: 0.06499	cysteine-type endopeptidase activator activity involved in apoptotic process: 0.07391	laminin binding: 0.07643	protein binding: 0.08762	iron-sulfur cluster binding: 0.0948
48	61	P62851, P30050, P62854, P62857, P50914, P05388, P62979, P39019, P18621, Q12906, P62910, P62424, P61513, P62913, P62280, Q02543, P46777, P62753, P62750, P52272, P25398, P62899, P46782, P26373, P62266, P62241, P36578, P62244, P62263, Q71UM5, P62249, P62917, P62277, P63220, P62906, P39023, P83731, P62847, P23396, P61313, P46778, P84098, P19338, P15880, P08708, P61247, P06748, P08865, P18124, P62829,…	506.25	24	21	232.933	40S_ribosomal_subunit,_cytoplasmic::Nop56p-associated_pre-rRNA_complex::TRBP_containing_complex_(DICER,_RPL7A,_EIF6,_MOV10_and_subunits_of_the_60S_ribosomal_particle)::DICER1-NCOA6-AGO2_complex::RNA-induced_silencing_complex,_RISC::TRBP_containing_complex_(DICER,_TRBP,_AGO2,_RPL7A,_EIF6,_MOV10)::FIB-associated_protein_complex	0.4275	129	Ribosome, cytoplasmic	0.5902	81	0.840483	structural constituent of ribosome: 1.746e-105	RNA binding: 2.328e-34	rRNA binding: 7.462e-10	mRNA binding: 3.565e-06	NF-kappaB binding: 0.005792	ribosomal large subunit binding: 0.005889	fibroblast growth factor binding: 0.006368	laminin receptor activity: 0.008807	5S rRNA binding: 0.008807	mRNA 5'-UTR binding: 0.01603	metal ion binding: 0.01664	translation regulator activity: 0.02456	Tat protein binding: 0.03016	DNA binding: 0.03193	ribosomal small subunit binding: 0.0357	protein kinase binding: 0.04454	translation initiation factor binding: 0.04523	protein kinase A binding: 0.05324	translation activator activity: 0.05456	DNA N-glycosylase activity: 0.05719	telomeric DNA binding: 0.06241	nucleotide binding: 0.06441	DNA-(apurinic or apyrimidinic site) lyase activity: 0.06499	protein binding: 0.07334	cysteine-type endopeptidase activator activity involved in apoptotic process: 0.07391	laminin binding: 0.07643	protein kinase inhibitor activity: 0.09361	iron-sulfur cluster binding: 0.0948
62	61	P62851, P30050, P62854, P62857, P50914, P05388, P62979, P39019, P18621, Q12906, P62910, P62424, P61513, P62913, P62280, Q02543, P62847, P62753, P62750, P62241, P52272, P25398, P62899, P46782, P62081, P62266, P61313, P36578, P62244, P62263, Q71UM5, P62249, P62917, P62277, P32969, P62906, P39023, P83731, P46777, P23396, P55769, P46778, Q14978, P62829, P35268, P15880, P08708, P61247, P08865, P18124,…	0.25	0	1	247	40S_ribosomal_subunit,_cytoplasmic::Nop56p-associated_pre-rRNA_complex::TRBP_containing_complex_(DICER,_RPL7A,_EIF6,_MOV10_and_subunits_of_the_60S_ribosomal_particle)::DICER1-NCOA6-AGO2_complex::RNA-induced_silencing_complex,_RISC::TRBP_containing_complex_(DICER,_TRBP,_AGO2,_RPL7A,_EIF6,_MOV10)::FIB-associated_protein_complex	0.4275	129	Ribosome, cytoplasmic	0.5902	81	0.839357	structural constituent of ribosome: 1.746e-105	RNA binding: 7.185e-33	rRNA binding: 7.462e-10	mRNA binding: 3.565e-06	ATP binding: 0.003074	fibroblast growth factor binding: 0.006368	laminin receptor activity: 0.008807	5S rRNA binding: 0.008807	mRNA 5'-UTR binding: 0.01603	metal ion binding: 0.01664	translation regulator activity: 0.02456	DNA binding: 0.03193	snoRNA binding: 0.04252	translation initiation factor binding: 0.04523	protein kinase A binding: 0.05324	translation activator activity: 0.05456	DNA N-glycosylase activity: 0.05719	DNA-(apurinic or apyrimidinic site) lyase activity: 0.06499	protein binding: 0.07334	cysteine-type endopeptidase activator activity involved in apoptotic process: 0.07391	laminin binding: 0.07643	iron-sulfur cluster binding: 0.0948
102	61	P62851, P18621, P50914, P62857, P05388, P62979, P39019, Q12906, P62910, P39023, P62424, P46776, P30050, P62913, P62280, P61513, P46777, P62753, P62750, P52272, P25398, P62899, P46782, Q02543, P62266, P62241, P36578, P62244, P62263, Q71UM5, P62249, P62917, P62277, P32969, P62906, P42766, P83731, P62847, P23396, P61313, P46778, P62829, P35268, P15880, P08708, P61247, P08865, P18124, P84098, P62701,…	0	0	0	0	40S_ribosomal_subunit,_cytoplasmic::Nop56p-associated_pre-rRNA_complex::TRBP_containing_complex_(DICER,_RPL7A,_EIF6,_MOV10_and_subunits_of_the_60S_ribosomal_particle)::DICER1-NCOA6-AGO2_complex::RNA-induced_silencing_complex,_RISC::TRBP_containing_complex_(DICER,_TRBP,_AGO2,_RPL7A,_EIF6,_MOV10)::FIB-associated_protein_complex	0.4275	129	Ribosome, cytoplasmic	0.6347	81	0.842629	structural constituent of ribosome: 7.351e-112	RNA binding: 7.185e-33	rRNA binding: 7.462e-10	mRNA binding: 1.875e-07	fibroblast growth factor binding: 0.006368	laminin receptor activity: 0.008807	5S rRNA binding: 0.008807	mRNA 5'-UTR binding: 0.01603	metal ion binding: 0.01664	translation regulator activity: 0.02456	DNA binding: 0.03193	translation initiation factor binding: 0.04523	protein kinase A binding: 0.05324	translation activator activity: 0.05456	DNA N-glycosylase activity: 0.05719	DNA-(apurinic or apyrimidinic site) lyase activity: 0.06499	cysteine-type endopeptidase activator activity involved in apoptotic process: 0.07391	laminin binding: 0.07643	protein binding: 0.08762	iron-sulfur cluster binding: 0.0948
349	62	P62851, P30050, P62854, P62857, P50914, P62899, P05388, P62979, P39019, P18621, Q12906, P62424, P61513, P62913, P62280, Q02543, P22087, Q9P287, P62753, P62750, P52272, P25398, P55769, P46782, P62081, P62266, P62241, P36578, P62244, P62263, Q71UM5, P62249, P62917, P62277, P26373, P32969, P62906, P39023, P83731, P46777, P23396, P61313, P46778, P84098, P35268, P15880, P08708, P61247, P08865, P18124,…	1722.25	38	45	248.783	40S_ribosomal_subunit,_cytoplasmic::Nop56p-associated_pre-rRNA_complex::TRBP_containing_complex_(DICER,_RPL7A,_EIF6,_MOV10_and_subunits_of_the_60S_ribosomal_particle)::DICER1-NCOA6-AGO2_complex::RNA-induced_silencing_complex,_RISC::TRBP_containing_complex_(DICER,_TRBP,_AGO2,_RPL7A,_EIF6,_MOV10)::FIB-associated_protein_complex	0.4206	129	Ribosome, cytoplasmic	0.5593	81	0.838255	structural constituent of ribosome: 1.85e-101	RNA binding: 5.72e-34	rRNA binding: 8.249e-10	mRNA binding: 3.92e-06	kinase regulator activity: 0.005985	fibroblast growth factor binding: 0.006568	laminin receptor activity: 0.008951	5S rRNA binding: 0.008951	metal ion binding: 0.01506	mRNA 5'-UTR binding: 0.01629	translation regulator activity: 0.02495	DNA binding: 0.0294	snoRNA binding: 0.04319	translation initiation factor binding: 0.04593	protein binding: 0.04877	protein kinase A binding: 0.05406	translation activator activity: 0.0554	DNA N-glycosylase activity: 0.05807	DNA-(apurinic or apyrimidinic site) lyase activity: 0.06598	cysteine-type endopeptidase activator activity involved in apoptotic process: 0.07503	laminin binding: 0.07758	iron-sulfur cluster binding: 0.09619
0	60	P62851, P18621, P62854, P62857, P50914, P05388, P62979, P39019, Q12906, P62910, P62424, P46776, P61513, P62913, P62280, P30050, P62847, P62753, P62750, P52272, P25398, P62899, P46782, Q02543, P62266, P62241, P36578, P62244, P62263, Q71UM5, P62249, P62917, P62277, P32969, P62906, P39023, P83731, P46777, P23396, P61313, P46778, P62829, P35268, P15880, P08708, P61247, P08865, P18124, P84098, P62701,…	0	0	0	0	40S_ribosomal_subunit,_cytoplasmic::Nop56p-associated_pre-rRNA_complex::TRBP_containing_complex_(DICER,_RPL7A,_EIF6,_MOV10_and_subunits_of_the_60S_ribosomal_particle)::DICER1-NCOA6-AGO2_complex::RNA-induced_silencing_complex,_RISC::TRBP_containing_complex_(DICER,_TRBP,_AGO2,_RPL7A,_EIF6,_MOV10)::FIB-associated_protein_complex	0.4198	129	Ribosome, cytoplasmic	0.6224	81	0.841504	structural constituent of ribosome: 6.567e-110	RNA binding: 2.972e-33	rRNA binding: 6.738e-10	mRNA binding: 3.236e-06	fibroblast growth factor binding: 0.006172	laminin receptor activity: 0.008664	5S rRNA binding: 0.008664	mRNA 5'-UTR binding: 0.01577	metal ion binding: 0.01837	translation regulator activity: 0.02416	DNA binding: 0.03465	translation initiation factor binding: 0.04452	protein kinase A binding: 0.05241	translation activator activity: 0.05372	DNA N-glycosylase activity: 0.05631	DNA-(apurinic or apyrimidinic site) lyase activity: 0.064	cysteine-type endopeptidase activator activity involved in apoptotic process: 0.0728	laminin binding: 0.07528	protein binding: 0.08227	iron-sulfur cluster binding: 0.09341
1	60	P62851, P30050, P50914, P62857, Q07020, P05388, P62979, P39019, P18621, Q12906, P62910, P62424, P61513, P62913, P62280, Q02543, P62847, P05387, P62753, P62750, P52272, P25398, P62899, P46782, P26373, P62266, P62241, P36578, P62244, P62263, Q71UM5, P62249, P62917, Q96L21, P32969, P62906, P39023, P83731, P46777, P23396, P61313, P46778, P62829, P35268, P15880, P08708, P61247, P08865, P18124, P84098,…	0	0	0	0	40S_ribosomal_subunit,_cytoplasmic::Nop56p-associated_pre-rRNA_complex::TRBP_containing_complex_(DICER,_RPL7A,_EIF6,_MOV10_and_subunits_of_the_60S_ribosomal_particle)::DICER1-NCOA6-AGO2_complex::RNA-induced_silencing_complex,_RISC::TRBP_containing_complex_(DICER,_TRBP,_AGO2,_RPL7A,_EIF6,_MOV10)::FIB-associated_protein_complex	0.4198	129	Ribosome, cytoplasmic	0.6224	81	0.837256	structural constituent of ribosome: 6.567e-110	RNA binding: 2.972e-33	rRNA binding: 6.738e-10	mRNA binding: 3.236e-06	fibroblast growth factor binding: 0.006172	laminin receptor activity: 0.008664	5S rRNA binding: 0.008664	mRNA 5'-UTR binding: 0.01577	metal ion binding: 0.01837	translation regulator activity: 0.02416	DNA binding: 0.03465	translation initiation factor binding: 0.04452	protein kinase A binding: 0.05241	translation activator activity: 0.05372	DNA N-glycosylase activity: 0.05631	DNA-(apurinic or apyrimidinic site) lyase activity: 0.064	cysteine-type endopeptidase activator activity involved in apoptotic process: 0.0728	laminin binding: 0.07528	iron-sulfur cluster binding: 0.09341	protein binding: 0.0949
2	60	P62851, P18621, P05386, P62854, P62857, P50914, Q07020, P05388, P62979, P39019, Q12906, P62910, P62424, P30050, P62913, P62280, P61513, P46777, P62753, P62750, P52272, P25398, P62899, P46782, Q02543, P62266, P62241, P36578, P62244, P62263, Q71UM5, P62249, P62917, Q96L21, P32969, P62906, P39023, P83731, P62847, P23396, P61313, P46778, P62829, P35268, P15880, P08708, P61247, P08865, P18124, P84098,…	0	0	0	0	40S_ribosomal_subunit,_cytoplasmic::Nop56p-associated_pre-rRNA_complex::TRBP_containing_complex_(DICER,_RPL7A,_EIF6,_MOV10_and_subunits_of_the_60S_ribosomal_particle)::DICER1-NCOA6-AGO2_complex::RNA-induced_silencing_complex,_RISC::TRBP_containing_complex_(DICER,_TRBP,_AGO2,_RPL7A,_EIF6,_MOV10)::FIB-associated_protein_complex	0.4198	129	Ribosome, cytoplasmic	0.6224	81	0.835349	structural constituent of ribosome: 6.567e-110	RNA binding: 2.972e-33	rRNA binding: 6.738e-10	mRNA binding: 3.236e-06	fibroblast growth factor binding: 0.006172	laminin receptor activity: 0.008664	5S rRNA binding: 0.008664	mRNA 5'-UTR binding: 0.01577	metal ion binding: 0.01837	translation regulator activity: 0.02416	DNA binding: 0.03465	translation initiation factor binding: 0.04452	protein kinase A binding: 0.05241	translation activator activity: 0.05372	DNA N-glycosylase activity: 0.05631	DNA-(apurinic or apyrimidinic site) lyase activity: 0.064	cysteine-type endopeptidase activator activity involved in apoptotic process: 0.0728	laminin binding: 0.07528	protein binding: 0.08227	iron-sulfur cluster binding: 0.09341
3	60	P62851, P18621, P62854, P62857, P50914, P05388, P08865, P39019, P46782, P62910, P39023, P62424, P30050, P62913, P62280, Q02543, P62847, P62753, P62750, P52272, P25398, P62899, Q07020, P26373, P62266, P62241, P36578, P62244, P62263, Q71UM5, P62249, P62917, Q96L21, P32969, P62906, P62979, P83731, P46777, P23396, P61313, P46778, P84098, P35268, P15880, P08708, P61247, Q12906, Q00839, P18124, P62829,…	0	0	0	0	40S_ribosomal_subunit,_cytoplasmic::Nop56p-associated_pre-rRNA_complex::TRBP_containing_complex_(DICER,_RPL7A,_EIF6,_MOV10_and_subunits_of_the_60S_ribosomal_particle)::DICER1-NCOA6-AGO2_complex::RNA-induced_silencing_complex,_RISC::TRBP_containing_complex_(DICER,_TRBP,_AGO2,_RPL7A,_EIF6,_MOV10)::FIB-associated_protein_complex	0.4198	129	Ribosome, cytoplasmic	0.6	81	0.842568	structural constituent of ribosome: 1.157e-106	RNA binding: 2.972e-33	rRNA binding: 6.738e-10	mRNA binding: 3.236e-06	ATP binding: 0.003443	fibroblast growth factor binding: 0.006172	laminin receptor activity: 0.008664	5S rRNA binding: 0.008664	mRNA 5'-UTR binding: 0.01577	metal ion binding: 0.01837	translation regulator activity: 0.02416	translation initiation factor binding: 0.04452	protein kinase A binding: 0.05241	translation activator activity: 0.05372	DNA N-glycosylase activity: 0.05631	DNA-(apurinic or apyrimidinic site) lyase activity: 0.064	DNA binding: 0.06985	cysteine-type endopeptidase activator activity involved in apoptotic process: 0.0728	laminin binding: 0.07528	protein binding: 0.08227	iron-sulfur cluster binding: 0.09341
4	60	P62851, P18621, P62854, P62857, P50914, P05388, P62979, P39019, P46782, P62910, P62424, P30050, P62913, P62280, P61513, P62847, P62753, P62750, P52272, P25398, P62899, Q07020, P46781, Q02543, P62266, P62241, P36578, P62244, P62263, Q71UM5, P62249, P62917, Q96L21, P32969, P62906, P39023, P83731, P46777, P23396, P61313, P46778, P84098, P35268, P15880, P08708, P61247, Q12906, P08865, P18124, P62829,…	0	0	0	0	40S_ribosomal_subunit,_cytoplasmic::Nop56p-associated_pre-rRNA_complex::TRBP_containing_complex_(DICER,_RPL7A,_EIF6,_MOV10_and_subunits_of_the_60S_ribosomal_particle)::DICER1-NCOA6-AGO2_complex::RNA-induced_silencing_complex,_RISC::TRBP_containing_complex_(DICER,_TRBP,_AGO2,_RPL7A,_EIF6,_MOV10)::FIB-associated_protein_complex	0.4198	129	Ribosome, cytoplasmic	0.6224	81	0.83871	structural constituent of ribosome: 6.567e-110	RNA binding: 8.927e-32	rRNA binding: 7.708e-12	mRNA binding: 3.236e-06	translation regulator activity: 0.000277	fibroblast growth factor binding: 0.006172	laminin receptor activity: 0.008664	5S rRNA binding: 0.008664	mRNA 5'-UTR binding: 0.01577	metal ion binding: 0.01837	DNA binding: 0.03465	translation initiation factor binding: 0.04452	protein kinase A binding: 0.05241	translation activator activity: 0.05372	DNA N-glycosylase activity: 0.05631	DNA-(apurinic or apyrimidinic site) lyase activity: 0.064	cysteine-type endopeptidase activator activity involved in apoptotic process: 0.0728	laminin binding: 0.07528	protein binding: 0.08227	iron-sulfur cluster binding: 0.09341
5	60	P62851, P30050, P62854, P62857, P50914, P05388, P62979, P39019, P18621, Q12906, P62910, P62424, P61513, P62913, P62280, Q02543, P62847, P62753, P62750, P62241, P52272, P25398, P62899, P46782, P62081, P62266, P61313, P36578, P62244, P62263, Q71UM5, P62249, P62917, P62277, P32969, P62906, P39023, P83731, P46777, P23396, P55769, P46778, P62829, P35268, P15880, P08708, P61247, P08865, P18124, P84098,…	0	0	0	0	40S_ribosomal_subunit,_cytoplasmic::Nop56p-associated_pre-rRNA_complex::TRBP_containing_complex_(DICER,_RPL7A,_EIF6,_MOV10_and_subunits_of_the_60S_ribosomal_particle)::DICER1-NCOA6-AGO2_complex::RNA-induced_silencing_complex,_RISC::TRBP_containing_complex_(DICER,_TRBP,_AGO2,_RPL7A,_EIF6,_MOV10)::FIB-associated_protein_complex	0.4198	129	Ribosome, cytoplasmic	0.6	81	0.838493	structural constituent of ribosome: 1.157e-106	RNA binding: 2.972e-33	rRNA binding: 6.738e-10	mRNA binding: 3.236e-06	fibroblast growth factor binding: 0.006172	laminin receptor activity: 0.008664	5S rRNA binding: 0.008664	mRNA 5'-UTR binding: 0.01577	metal ion binding: 0.01837	translation regulator activity: 0.02416	DNA binding: 0.03465	snoRNA binding: 0.04186	translation initiation factor binding: 0.04452	protein kinase A binding: 0.05241	translation activator activity: 0.05372	DNA N-glycosylase activity: 0.05631	DNA-(apurinic or apyrimidinic site) lyase activity: 0.064	cysteine-type endopeptidase activator activity involved in apoptotic process: 0.0728	laminin binding: 0.07528	protein binding: 0.08227	iron-sulfur cluster binding: 0.09341
6	60	P62851, P18621, P50914, P62857, P05388, P62979, P39019, P46782, P62910, P62424, P30050, P62913, P62280, Q02543, P62917, P62753, P62750, P52272, P25398, P62899, Q12906, P26373, P62266, P62241, P36578, P62244, P62263, Q71UM5, P62249, P62277, P63220, P62906, P39023, P83731, P46777, P23396, P61313, P46778, P84098, P19338, P15880, P08708, P61247, P08865, P18124, P62829, P62701, P62847, P27635, P35268,…	0	0	0	0	40S_ribosomal_subunit,_cytoplasmic::Nop56p-associated_pre-rRNA_complex::TRBP_containing_complex_(DICER,_RPL7A,_EIF6,_MOV10_and_subunits_of_the_60S_ribosomal_particle)::DICER1-NCOA6-AGO2_complex::RNA-induced_silencing_complex,_RISC::TRBP_containing_complex_(DICER,_TRBP,_AGO2,_RPL7A,_EIF6,_MOV10)::FIB-associated_protein_complex	0.4198	129	Ribosome, cytoplasmic	0.6	81	0.839838	structural constituent of ribosome: 1.157e-106	RNA binding: 2.972e-33	rRNA binding: 6.738e-10	mRNA binding: 3.236e-06	fibroblast growth factor binding: 0.006172	laminin receptor activity: 0.008664	5S rRNA binding: 0.008664	mRNA 5'-UTR binding: 0.01577	metal ion binding: 0.01837	translation regulator activity: 0.02416	DNA binding: 0.03465	nucleic acid binding: 0.04321	translation initiation factor binding: 0.04452	protein kinase A binding: 0.05241	translation activator activity: 0.05372	DNA N-glycosylase activity: 0.05631	telomeric DNA binding: 0.06145	nucleotide binding: 0.06193	DNA-(apurinic or apyrimidinic site) lyase activity: 0.064	cysteine-type endopeptidase activator activity involved in apoptotic process: 0.0728	laminin binding: 0.07528	protein binding: 0.08227	iron-sulfur cluster binding: 0.09341
7	60	P62851, P18621, P62854, P62857, P50914, Q07020, P05388, P62979, P39019, Q12906, P62910, P39023, P62424, P61513, P62913, P62280, P30050, P62847, P62753, P62750, P52272, P25398, P62899, P46782, Q02543, P62266, P62241, P36578, P62244, P62263, Q71UM5, P62249, P62917, Q96L21, P63220, P62906, P62841, P83731, P46777, P23396, P61313, P46778, P62829, P35268, P15880, P08708, P61247, P08865, P18124, P84098,…	0	0	0	0	40S_ribosomal_subunit,_cytoplasmic::Nop56p-associated_pre-rRNA_complex::TRBP_containing_complex_(DICER,_RPL7A,_EIF6,_MOV10_and_subunits_of_the_60S_ribosomal_particle)::DICER1-NCOA6-AGO2_complex::RNA-induced_silencing_complex,_RISC::TRBP_containing_complex_(DICER,_TRBP,_AGO2,_RPL7A,_EIF6,_MOV10)::FIB-associated_protein_complex	0.4198	129	Ribosome, cytoplasmic	0.6224	81	0.839973	structural constituent of ribosome: 6.567e-110	RNA binding: 2.972e-33	rRNA binding: 6.738e-10	mRNA binding: 3.236e-06	fibroblast growth factor binding: 0.006172	laminin receptor activity: 0.008664	5S rRNA binding: 0.008664	mRNA 5'-UTR binding: 0.01577	metal ion binding: 0.01837	translation regulator activity: 0.02416	translation initiation factor binding: 0.04452	protein kinase A binding: 0.05241	translation activator activity: 0.05372	DNA N-glycosylase activity: 0.05631	DNA-(apurinic or apyrimidinic site) lyase activity: 0.064	DNA binding: 0.06985	cysteine-type endopeptidase activator activity involved in apoptotic process: 0.0728	laminin binding: 0.07528	iron-sulfur cluster binding: 0.09341	protein binding: 0.0949
8	60	P62851, P18621, P62854, P62857, P50914, Q07020, P05388, P62979, P39019, Q12906, P62910, P62424, P61513, P62913, P62280, P30050, P62847, P62753, P62750, P52272, P25398, P62899, P46782, Q02543, P62266, P62241, P36578, P62244, P62263, Q71UM5, P62249, P62917, Q96L21, P32969, P62906, P39023, P83731, P46777, P23396, P61313, P46778, P62829, P35268, P15880, P08708, P61247, P08865, P18124, P68104, P84098,…	0	0	0	0	40S_ribosomal_subunit,_cytoplasmic::Nop56p-associated_pre-rRNA_complex::TRBP_containing_complex_(DICER,_RPL7A,_EIF6,_MOV10_and_subunits_of_the_60S_ribosomal_particle)::DICER1-NCOA6-AGO2_complex::RNA-induced_silencing_complex,_RISC::TRBP_containing_complex_(DICER,_TRBP,_AGO2,_RPL7A,_EIF6,_MOV10)::FIB-associated_protein_complex	0.4198	129	Ribosome, cytoplasmic	0.6	81	0.84057	structural constituent of ribosome: 1.157e-106	RNA binding: 8.927e-32	rRNA binding: 6.738e-10	mRNA binding: 3.236e-06	fibroblast growth factor binding: 0.006172	laminin receptor activity: 0.008664	5S rRNA binding: 0.008664	mRNA 5'-UTR binding: 0.01577	metal ion binding: 0.01837	translation regulator activity: 0.02416	DNA binding: 0.03465	protein kinase binding: 0.04265	translation initiation factor binding: 0.04452	protein kinase A binding: 0.05241	translation activator activity: 0.05372	DNA N-glycosylase activity: 0.05631	DNA-(apurinic or apyrimidinic site) lyase activity: 0.064	cysteine-type endopeptidase activator activity involved in apoptotic process: 0.0728	laminin binding: 0.07528	protein binding: 0.08227	iron-sulfur cluster binding: 0.09341
11	60	P62851, P18621, P50914, P62857, Q07020, P05388, P62979, P39019, P46782, P62910, P62424, P30050, P62913, P62280, Q02543, P62854, P62753, P62750, P52272, P25398, P62899, Q12906, Q12905, P26373, P62266, P62241, P36578, P62244, P62263, Q71UM5, P62249, P62917, Q96L21, P63220, P62906, P39023, P83731, P46777, P23396, P61313, P46778, P62829, P35268, P15880, P08708, P61247, P08865, P18124, P84098, P62701,…	0	0	0	0	40S_ribosomal_subunit,_cytoplasmic::Nop56p-associated_pre-rRNA_complex::TRBP_containing_complex_(DICER,_RPL7A,_EIF6,_MOV10_and_subunits_of_the_60S_ribosomal_particle)::DICER1-NCOA6-AGO2_complex::RNA-induced_silencing_complex,_RISC::TRBP_containing_complex_(DICER,_TRBP,_AGO2,_RPL7A,_EIF6,_MOV10)::FIB-associated_protein_complex	0.4198	129	Ribosome, cytoplasmic	0.6	81	0.842355	structural constituent of ribosome: 1.157e-106	RNA binding: 8.927e-32	rRNA binding: 6.738e-10	mRNA binding: 3.236e-06	ATP binding: 0.003443	fibroblast growth factor binding: 0.006172	laminin receptor activity: 0.008664	5S rRNA binding: 0.008664	double-stranded RNA binding: 0.008801	mRNA 5'-UTR binding: 0.01577	metal ion binding: 0.01837	translation regulator activity: 0.02416	translation initiation factor binding: 0.04452	protein kinase A binding: 0.05241	translation activator activity: 0.05372	DNA N-glycosylase activity: 0.05631	DNA-(apurinic or apyrimidinic site) lyase activity: 0.064	DNA binding: 0.06985	cysteine-type endopeptidase activator activity involved in apoptotic process: 0.0728	laminin binding: 0.07528	protein binding: 0.08227	iron-sulfur cluster binding: 0.09341
13	60	P62851, P30050, P62854, P62857, P50914, P05388, P62979, P39019, P18621, Q12906, P62910, P62424, P61513, P62913, P62280, Q02543, P22087, P62753, P62750, P52272, P25398, P62899, P46782, P62081, P62266, P62241, P36578, P62244, P62263, Q71UM5, P62249, P62917, P62277, P32969, P62906, P39023, P83731, P46777, P23396, P61313, P46778, P62829, P35268, P15880, P08708, P61247, P08865, P18124, P84098, P62701,…	0	0	0	0	40S_ribosomal_subunit,_cytoplasmic::Nop56p-associated_pre-rRNA_complex::TRBP_containing_complex_(DICER,_RPL7A,_EIF6,_MOV10_and_subunits_of_the_60S_ribosomal_particle)::DICER1-NCOA6-AGO2_complex::RNA-induced_silencing_complex,_RISC::TRBP_containing_complex_(DICER,_TRBP,_AGO2,_RPL7A,_EIF6,_MOV10)::FIB-associated_protein_complex	0.4198	129	Ribosome, cytoplasmic	0.6	81	0.83908	structural constituent of ribosome: 1.157e-106	RNA binding: 2.972e-33	rRNA binding: 6.738e-10	mRNA binding: 3.236e-06	fibroblast growth factor binding: 0.006172	laminin receptor activity: 0.008664	5S rRNA binding: 0.008664	mRNA 5'-UTR binding: 0.01577	metal ion binding: 0.01837	translation regulator activity: 0.02416	DNA binding: 0.03465	translation initiation factor binding: 0.04452	protein kinase A binding: 0.05241	translation activator activity: 0.05372	DNA N-glycosylase activity: 0.05631	DNA-(apurinic or apyrimidinic site) lyase activity: 0.064	cysteine-type endopeptidase activator activity involved in apoptotic process: 0.0728	laminin binding: 0.07528	protein binding: 0.08227	iron-sulfur cluster binding: 0.09341
14	60	P62851, P18621, P62854, P62857, P05388, P62979, P39019, P46782, P62910, P62424, P83731, P30050, P62913, P62280, P61513, P50914, P62753, P62750, P52272, P25398, P62899, P62277, Q02543, P62266, P62241, P36578, P62244, P62263, Q71UM5, P62249, P62917, Q96L21, P32969, P62906, P39023, P61353, P62847, P23396, P61313, P46778, P84098, P35268, P15880, P08708, P46777, P61247, Q12906, P08865, P18124, P62829,…	0	0	0	0	40S_ribosomal_subunit,_cytoplasmic::Nop56p-associated_pre-rRNA_complex::TRBP_containing_complex_(DICER,_RPL7A,_EIF6,_MOV10_and_subunits_of_the_60S_ribosomal_particle)::DICER1-NCOA6-AGO2_complex::RNA-induced_silencing_complex,_RISC::TRBP_containing_complex_(DICER,_TRBP,_AGO2,_RPL7A,_EIF6,_MOV10)::FIB-associated_protein_complex	0.4198	129	Ribosome, cytoplasmic	0.6224	81	0.838275	structural constituent of ribosome: 6.567e-110	RNA binding: 8.927e-32	rRNA binding: 6.738e-10	mRNA binding: 3.236e-06	fibroblast growth factor binding: 0.006172	laminin receptor activity: 0.008664	5S rRNA binding: 0.008664	mRNA 5'-UTR binding: 0.01577	metal ion binding: 0.01837	translation regulator activity: 0.02416	DNA binding: 0.03465	translation initiation factor binding: 0.04452	protein kinase A binding: 0.05241	translation activator activity: 0.05372	DNA N-glycosylase activity: 0.05631	DNA-(apurinic or apyrimidinic site) lyase activity: 0.064	cysteine-type endopeptidase activator activity involved in apoptotic process: 0.0728	laminin binding: 0.07528	iron-sulfur cluster binding: 0.09341	protein binding: 0.0949
15	60	P62851, P18621, P50914, P62857, P47914, P05388, P62979, P39019, Q12906, P62910, P62424, P30050, P62913, P62280, P61513, P62847, P62753, P62750, P52272, P25398, P62899, P46782, Q02543, P62266, P62241, P36578, P62244, P62263, Q71UM5, P62249, P62917, P62277, P63220, P62906, P39023, P83731, P46777, P23396, P61313, P46778, P62829, P35268, P15880, P08708, P61247, P08865, P18124, P84098, P62701, P27635,…	0	0	0	0	40S_ribosomal_subunit,_cytoplasmic::Nop56p-associated_pre-rRNA_complex::TRBP_containing_complex_(DICER,_RPL7A,_EIF6,_MOV10_and_subunits_of_the_60S_ribosomal_particle)::DICER1-NCOA6-AGO2_complex::RNA-induced_silencing_complex,_RISC::TRBP_containing_complex_(DICER,_TRBP,_AGO2,_RPL7A,_EIF6,_MOV10)::FIB-associated_protein_complex	0.4198	129	Ribosome, cytoplasmic	0.6224	81	0.843098	structural constituent of ribosome: 6.567e-110	RNA binding: 2.972e-33	rRNA binding: 6.738e-10	mRNA binding: 3.236e-06	fibroblast growth factor binding: 0.006172	laminin receptor activity: 0.008664	5S rRNA binding: 0.008664	mRNA 5'-UTR binding: 0.01577	metal ion binding: 0.01837	translation regulator activity: 0.02416	DNA binding: 0.03465	translation initiation factor binding: 0.04452	protein kinase A binding: 0.05241	translation activator activity: 0.05372	DNA N-glycosylase activity: 0.05631	DNA-(apurinic or apyrimidinic site) lyase activity: 0.064	cysteine-type endopeptidase activator activity involved in apoptotic process: 0.0728	laminin binding: 0.07528	heparin binding: 0.07769	iron-sulfur cluster binding: 0.09341	protein binding: 0.0949
16	60	P62851, P30050, P50914, P62857, P05388, P62979, P39019, P18621, Q12906, P62910, O00567, P62424, P61513, P62913, P62280, Q02543, P62847, P62753, P62750, P52272, P25398, P62899, P46782, P62081, P62266, P62241, P36578, P62244, P62263, Q71UM5, P62249, P62917, P62277, P32969, P62906, P39023, P83731, P46777, P23396, P61313, P46778, P62829, P35268, P15880, P08708, P61247, P08865, P18124, P84098, P62701,…	0	0	0	0	40S_ribosomal_subunit,_cytoplasmic::Nop56p-associated_pre-rRNA_complex::TRBP_containing_complex_(DICER,_RPL7A,_EIF6,_MOV10_and_subunits_of_the_60S_ribosomal_particle)::DICER1-NCOA6-AGO2_complex::RNA-induced_silencing_complex,_RISC::TRBP_containing_complex_(DICER,_TRBP,_AGO2,_RPL7A,_EIF6,_MOV10)::FIB-associated_protein_complex	0.4198	129	Ribosome, cytoplasmic	0.6	81	0.837728	structural constituent of ribosome: 1.157e-106	RNA binding: 2.972e-33	rRNA binding: 6.738e-10	mRNA binding: 3.236e-06	fibroblast growth factor binding: 0.006172	laminin receptor activity: 0.008664	5S rRNA binding: 0.008664	mRNA 5'-UTR binding: 0.01577	metal ion binding: 0.01837	translation regulator activity: 0.02416	DNA binding: 0.03465	snoRNA binding: 0.04186	translation initiation factor binding: 0.04452	protein kinase A binding: 0.05241	translation activator activity: 0.05372	DNA N-glycosylase activity: 0.05631	DNA-(apurinic or apyrimidinic site) lyase activity: 0.064	cysteine-type endopeptidase activator activity involved in apoptotic process: 0.0728	laminin binding: 0.07528	protein binding: 0.08227	iron-sulfur cluster binding: 0.09341
18	60	P62851, P18621, P50914, P62857, P05388, P62979, P39019, P05141, Q12906, P62910, P62424, P61513, P62913, P62280, P30050, P62854, P62753, P62750, P52272, P25398, P62899, P46782, Q02543, P62266, P62241, P36578, P62244, P62263, Q71UM5, P62249, P62917, P62277, P32969, P62906, P39023, P83731, P46777, P23396, P61313, P46778, P62829, P35268, P15880, P08708, P61247, P08865, P18124, P84098, P62701, P62847,…	0	0	0	0	40S_ribosomal_subunit,_cytoplasmic::Nop56p-associated_pre-rRNA_complex::TRBP_containing_complex_(DICER,_RPL7A,_EIF6,_MOV10_and_subunits_of_the_60S_ribosomal_particle)::DICER1-NCOA6-AGO2_complex::RNA-induced_silencing_complex,_RISC::TRBP_containing_complex_(DICER,_TRBP,_AGO2,_RPL7A,_EIF6,_MOV10)::FIB-associated_protein_complex	0.4198	129	Ribosome, cytoplasmic	0.6	81	0.842034	structural constituent of ribosome: 1.157e-106	RNA binding: 8.927e-32	rRNA binding: 6.738e-10	mRNA binding: 3.236e-06	adenine transmembrane transporter activity: 0.002905	fibroblast growth factor binding: 0.006172	laminin receptor activity: 0.008664	5S rRNA binding: 0.008664	mRNA 5'-UTR binding: 0.01577	metal ion binding: 0.01837	translation regulator activity: 0.02416	DNA binding: 0.03465	translation initiation factor binding: 0.04452	protein kinase A binding: 0.05241	translation activator activity: 0.05372	DNA N-glycosylase activity: 0.05631	DNA-(apurinic or apyrimidinic site) lyase activity: 0.064	cysteine-type endopeptidase activator activity involved in apoptotic process: 0.0728	laminin binding: 0.07528	protein binding: 0.08227	iron-sulfur cluster binding: 0.09341
20	60	P62851, P18621, P50914, P62857, Q07020, P05388, P62979, P39019, Q12906, P62910, P62424, P61513, P62913, P62280, P30050, P62854, P62753, P62750, P52272, P25398, P46783, P46782, Q02543, P62266, P62241, P36578, P62244, P62263, P62899, Q71UM5, P62249, P62917, Q96L21, P32969, P62906, P39023, P83731, P46777, P23396, P61313, P46778, P62829, P35268, P15880, P08708, P61247, P08865, P18124, P84098, P62701,…	0	0	0	0	40S_ribosomal_subunit,_cytoplasmic::Nop56p-associated_pre-rRNA_complex::TRBP_containing_complex_(DICER,_RPL7A,_EIF6,_MOV10_and_subunits_of_the_60S_ribosomal_particle)::DICER1-NCOA6-AGO2_complex::RNA-induced_silencing_complex,_RISC::TRBP_containing_complex_(DICER,_TRBP,_AGO2,_RPL7A,_EIF6,_MOV10)::FIB-associated_protein_complex	0.4198	129	Ribosome, cytoplasmic	0.6224	81	0.838535	structural constituent of ribosome: 1.157e-106	RNA binding: 8.927e-32	rRNA binding: 6.738e-10	mRNA binding: 3.236e-06	fibroblast growth factor binding: 0.006172	laminin receptor activity: 0.008664	5S rRNA binding: 0.008664	mRNA 5'-UTR binding: 0.01577	metal ion binding: 0.01837	translation regulator activity: 0.02416	DNA binding: 0.03465	translation initiation factor binding: 0.04452	protein kinase A binding: 0.05241	translation activator activity: 0.05372	DNA N-glycosylase activity: 0.05631	DNA-(apurinic or apyrimidinic site) lyase activity: 0.064	cysteine-type endopeptidase activator activity involved in apoptotic process: 0.0728	laminin binding: 0.07528	protein binding: 0.08227	iron-sulfur cluster binding: 0.09341
24	60	P62851, P18621, P62854, P62857, P50914, Q07020, P05388, P62979, P39019, Q12906, P62910, P62424, P61513, P62913, P62280, P30050, P62847, P62753, P62750, P52272, P25398, P62899, P46782, Q02543, P62266, P62241, Q9Y2X3, P36578, P62244, P62263, Q71UM5, P62249, P62917, Q96L21, P32969, P62906, P39023, P83731, P46777, P23396, P61313, P46778, P84098, P35268, P15880, P08708, P61247, P08865, P18124, P62829,…	0	0	0	0	40S_ribosomal_subunit,_cytoplasmic::Nop56p-associated_pre-rRNA_complex::TRBP_containing_complex_(DICER,_RPL7A,_EIF6,_MOV10_and_subunits_of_the_60S_ribosomal_particle)::DICER1-NCOA6-AGO2_complex::RNA-induced_silencing_complex,_RISC::TRBP_containing_complex_(DICER,_TRBP,_AGO2,_RPL7A,_EIF6,_MOV10)::FIB-associated_protein_complex	0.4198	129	Ribosome, cytoplasmic	0.6	81	0.836957	structural constituent of ribosome: 1.157e-106	RNA binding: 8.927e-32	rRNA binding: 6.738e-10	mRNA binding: 3.236e-06	fibroblast growth factor binding: 0.006172	laminin receptor activity: 0.008664	5S rRNA binding: 0.008664	mRNA 5'-UTR binding: 0.01577	metal ion binding: 0.01837	translation regulator activity: 0.02416	DNA binding: 0.03465	snoRNA binding: 0.04186	translation initiation factor binding: 0.04452	protein kinase A binding: 0.05241	translation activator activity: 0.05372	DNA N-glycosylase activity: 0.05631	DNA-(apurinic or apyrimidinic site) lyase activity: 0.064	cysteine-type endopeptidase activator activity involved in apoptotic process: 0.0728	laminin binding: 0.07528	protein binding: 0.08227	iron-sulfur cluster binding: 0.09341
25	60	P62851, Q08211, P30050, P62854, P62857, P50914, P05388, P62979, P39019, P18621, Q12906, P62910, P62424, P61513, P62913, P62280, Q02543, P62847, P62753, P62750, P52272, P25398, P62899, P46782, P26373, P62266, P62241, P36578, P62244, P62263, Q71UM5, P62249, P62917, P62277, P63220, P62906, P39023, P83731, P46777, P23396, P61313, P46778, P62829, P35268, P15880, P08708, P61247, P08865, P18124, P84098,…	0	0	0	0	40S_ribosomal_subunit,_cytoplasmic::Nop56p-associated_pre-rRNA_complex::TRBP_containing_complex_(DICER,_RPL7A,_EIF6,_MOV10_and_subunits_of_the_60S_ribosomal_particle)::DICER1-NCOA6-AGO2_complex::RNA-induced_silencing_complex,_RISC::TRBP_containing_complex_(DICER,_TRBP,_AGO2,_RPL7A,_EIF6,_MOV10)::FIB-associated_protein_complex	0.4198	129	Ribosome, cytoplasmic	0.6	81	0.841389	structural constituent of ribosome: 1.157e-106	RNA binding: 2.972e-33	rRNA binding: 6.738e-10	mRNA binding: 3.236e-06	ATP binding: 0.003443	fibroblast growth factor binding: 0.006172	laminin receptor activity: 0.008664	5S rRNA binding: 0.008664	mRNA 5'-UTR binding: 0.01577	metal ion binding: 0.01837	translation regulator activity: 0.02416	RNA helicase activity: 0.03918	translation initiation factor binding: 0.04452	protein kinase A binding: 0.05241	translation activator activity: 0.05372	DNA N-glycosylase activity: 0.05631	DNA-(apurinic or apyrimidinic site) lyase activity: 0.064	DNA binding: 0.06985	cysteine-type endopeptidase activator activity involved in apoptotic process: 0.0728	laminin binding: 0.07528	protein binding: 0.08227	iron-sulfur cluster binding: 0.09341
29	60	P62851, P18621, P62854, P62857, P50914, P05388, P62979, P39019, Q12906, P62910, P62424, P61513, P62913, P62280, P30050, P62847, P62753, P62750, P52272, P25398, P62899, P46782, Q02543, P62266, P62241, P36578, P62244, P62263, Q71UM5, P62249, P62917, P62277, P26373, P32969, P62906, P39023, P83731, P46777, P23396, P61313, P46778, P62829, P35268, P15880, P08708, P61247, P08865, P18124, P84098, P62701,…	0	0	0	0	40S_ribosomal_subunit,_cytoplasmic::Nop56p-associated_pre-rRNA_complex::TRBP_containing_complex_(DICER,_RPL7A,_EIF6,_MOV10_and_subunits_of_the_60S_ribosomal_particle)::DICER1-NCOA6-AGO2_complex::RNA-induced_silencing_complex,_RISC::TRBP_containing_complex_(DICER,_TRBP,_AGO2,_RPL7A,_EIF6,_MOV10)::FIB-associated_protein_complex	0.4198	129	Ribosome, cytoplasmic	0.6224	81	0.841389	structural constituent of ribosome: 6.567e-110	RNA binding: 8.927e-32	rRNA binding: 6.738e-10	mRNA binding: 3.236e-06	fibroblast growth factor binding: 0.006172	laminin receptor activity: 0.008664	5S rRNA binding: 0.008664	mRNA 5'-UTR binding: 0.01577	metal ion binding: 0.01837	translation regulator activity: 0.02416	zinc ion binding: 0.02446	DNA binding: 0.03465	translation initiation factor binding: 0.04452	protein kinase A binding: 0.05241	translation activator activity: 0.05372	DNA N-glycosylase activity: 0.05631	DNA-(apurinic or apyrimidinic site) lyase activity: 0.064	cysteine-type endopeptidase activator activity involved in apoptotic process: 0.0728	laminin binding: 0.07528	iron-sulfur cluster binding: 0.09341	protein binding: 0.0949
36	60	P62851, P18621, P62854, P62857, P50914, Q07020, P56537, P62979, P39019, Q12906, P62910, P62424, P61513, P62913, P62280, P30050, P62847, P62753, P62750, P52272, P25398, P62899, P46782, Q02543, P62266, P62241, P36578, P62244, P62263, P05388, Q71UM5, P62249, P62917, Q96L21, P32969, P62906, P39023, P83731, P46777, P23396, P61313, P46778, P62829, P35268, P15880, P08708, P61247, P08865, P18124, P84098,…	0	0	0	0	40S_ribosomal_subunit,_cytoplasmic::Nop56p-associated_pre-rRNA_complex::TRBP_containing_complex_(DICER,_RPL7A,_EIF6,_MOV10_and_subunits_of_the_60S_ribosomal_particle)::DICER1-NCOA6-AGO2_complex::RNA-induced_silencing_complex,_RISC::TRBP_containing_complex_(DICER,_TRBP,_AGO2,_RPL7A,_EIF6,_MOV10)::FIB-associated_protein_complex	0.4198	129	Ribosome, cytoplasmic	0.6	81	0.837764	structural constituent of ribosome: 1.157e-106	RNA binding: 8.927e-32	rRNA binding: 6.738e-10	mRNA binding: 3.236e-06	fibroblast growth factor binding: 0.006172	ribosome binding: 0.006903	laminin receptor activity: 0.008664	5S rRNA binding: 0.008664	mRNA 5'-UTR binding: 0.01577	metal ion binding: 0.01837	translation regulator activity: 0.02416	DNA binding: 0.03465	translation initiation factor binding: 0.04452	protein kinase A binding: 0.05241	translation activator activity: 0.05372	DNA N-glycosylase activity: 0.05631	DNA-(apurinic or apyrimidinic site) lyase activity: 0.064	cysteine-type endopeptidase activator activity involved in apoptotic process: 0.0728	laminin binding: 0.07528	protein binding: 0.08227	iron-sulfur cluster binding: 0.09341
39	60	P62851, P18621, P50914, P62857, P05388, P62979, P39019, Q12906, P62910, P62424, P30050, P62913, P62280, P61513, P62854, P62753, P62750, P52272, P25398, P62899, P46782, Q02543, P62266, P62241, P36578, P62244, P62263, Q71UM5, P62249, P62917, P62277, P32969, P62906, P39023, P83731, P46777, P23396, P61313, P08238, P46778, P62829, P35268, P15880, P08708, P61247, P08865, P18124, P84098, P62701, P62847,…	0	0	0	0	40S_ribosomal_subunit,_cytoplasmic::Nop56p-associated_pre-rRNA_complex::TRBP_containing_complex_(DICER,_RPL7A,_EIF6,_MOV10_and_subunits_of_the_60S_ribosomal_particle)::DICER1-NCOA6-AGO2_complex::RNA-induced_silencing_complex,_RISC::TRBP_containing_complex_(DICER,_TRBP,_AGO2,_RPL7A,_EIF6,_MOV10)::FIB-associated_protein_complex	0.4198	129	Ribosome, cytoplasmic	0.6	81	0.840956	structural constituent of ribosome: 1.157e-106	RNA binding: 8.927e-32	rRNA binding: 6.738e-10	mRNA binding: 3.236e-06	ATP binding: 0.003443	fibroblast growth factor binding: 0.006172	laminin receptor activity: 0.008664	sulfonylurea receptor binding: 0.008664	CTP binding: 0.008664	5S rRNA binding: 0.008664	UTP binding: 0.01152	dATP binding: 0.01436	mRNA 5'-UTR binding: 0.01577	metal ion binding: 0.01837	translation regulator activity: 0.02416	TPR domain binding: 0.02968	DNA binding: 0.03465	nitric-oxide synthase regulator activity: 0.03648	protein kinase binding: 0.04265	translation initiation factor binding: 0.04452	protein kinase A binding: 0.05241	translation activator activity: 0.05372	DNA N-glycosylase activity: 0.05631	DNA-(apurinic or apyrimidinic site) lyase activity: 0.064	cysteine-type endopeptidase activator activity involved in apoptotic process: 0.0728	laminin binding: 0.07528	protein binding: 0.08227	iron-sulfur cluster binding: 0.09341
40	60	P62851, P18621, P50914, P62857, Q07020, P05388, P62979, P39019, Q12906, P62910, P55209, P62424, P30050, P62913, P62280, P61513, P62854, P62753, P62750, P52272, P25398, P62899, P46782, Q02543, P62266, P62241, P36578, P62244, P62263, Q71UM5, P62249, P62917, Q96L21, P32969, P62906, P39023, P83731, P46777, P23396, P61313, P46778, P62829, P35268, P15880, P08708, P61247, P08865, P18124, P84098, P62701,…	0	0	0	0	40S_ribosomal_subunit,_cytoplasmic::Nop56p-associated_pre-rRNA_complex::TRBP_containing_complex_(DICER,_RPL7A,_EIF6,_MOV10_and_subunits_of_the_60S_ribosomal_particle)::DICER1-NCOA6-AGO2_complex::RNA-induced_silencing_complex,_RISC::TRBP_containing_complex_(DICER,_TRBP,_AGO2,_RPL7A,_EIF6,_MOV10)::FIB-associated_protein_complex	0.4198	129	Ribosome, cytoplasmic	0.6	81	0.840599	structural constituent of ribosome: 1.157e-106	RNA binding: 8.927e-32	rRNA binding: 6.738e-10	mRNA binding: 3.236e-06	fibroblast growth factor binding: 0.006172	laminin receptor activity: 0.008664	5S rRNA binding: 0.008664	mRNA 5'-UTR binding: 0.01577	metal ion binding: 0.01837	translation regulator activity: 0.02416	DNA binding: 0.03465	translation initiation factor binding: 0.04452	protein kinase A binding: 0.05241	translation activator activity: 0.05372	DNA N-glycosylase activity: 0.05631	DNA-(apurinic or apyrimidinic site) lyase activity: 0.064	cysteine-type endopeptidase activator activity involved in apoptotic process: 0.0728	laminin binding: 0.07528	protein binding: 0.08227	iron-sulfur cluster binding: 0.09341
47	60	P62851, P18621, P62854, P62857, P50914, Q07020, P05388, P62979, P39019, Q12906, P62910, P62888, P62424, P30050, P62913, P62280, P61513, P62847, P62753, P62750, P52272, P25398, P62899, P46782, Q02543, P62266, P62241, P36578, P62244, P62263, Q71UM5, P62249, P62917, Q96L21, P32969, P62906, P39023, P83731, P46777, P23396, P61313, P46778, P62829, P35268, P15880, P08708, P61247, P08865, P18124, P84098,…	0	0	0	0	40S_ribosomal_subunit,_cytoplasmic::Nop56p-associated_pre-rRNA_complex::TRBP_containing_complex_(DICER,_RPL7A,_EIF6,_MOV10_and_subunits_of_the_60S_ribosomal_particle)::DICER1-NCOA6-AGO2_complex::RNA-induced_silencing_complex,_RISC::TRBP_containing_complex_(DICER,_TRBP,_AGO2,_RPL7A,_EIF6,_MOV10)::FIB-associated_protein_complex	0.4198	129	Ribosome, cytoplasmic	0.6	81	0.841389	structural constituent of ribosome: 1.157e-106	RNA binding: 8.927e-32	rRNA binding: 6.738e-10	mRNA binding: 3.236e-06	fibroblast growth factor binding: 0.006172	laminin receptor activity: 0.008664	5S rRNA binding: 0.008664	mRNA 5'-UTR binding: 0.01577	metal ion binding: 0.01837	translation regulator activity: 0.02416	translation initiation factor binding: 0.04452	protein kinase A binding: 0.05241	translation activator activity: 0.05372	DNA N-glycosylase activity: 0.05631	DNA-(apurinic or apyrimidinic site) lyase activity: 0.064	DNA binding: 0.06985	cysteine-type endopeptidase activator activity involved in apoptotic process: 0.0728	laminin binding: 0.07528	protein binding: 0.08227	iron-sulfur cluster binding: 0.09341
65	60	P62851, P18621, P62854, P62857, P50914, Q07020, P05388, P62979, P39019, Q12906, P62910, P62424, P61513, P62913, P62280, P30050, P62847, P62753, P62750, P52272, P25398, P62899, P46782, Q02543, P62266, P62241, P36578, P62244, P62263, Q71UM5, P62249, P62917, P13639, Q96L21, P32969, P62906, P39023, P83731, P46777, P23396, P61313, P46778, P62829, P35268, P15880, P08708, P61247, P08865, P18124, P68104,…	30450.2	178	171	241.745	40S_ribosomal_subunit,_cytoplasmic::Nop56p-associated_pre-rRNA_complex::TRBP_containing_complex_(DICER,_RPL7A,_EIF6,_MOV10_and_subunits_of_the_60S_ribosomal_particle)::DICER1-NCOA6-AGO2_complex::RNA-induced_silencing_complex,_RISC::TRBP_containing_complex_(DICER,_TRBP,_AGO2,_RPL7A,_EIF6,_MOV10)::FIB-associated_protein_complex	0.4198	129	Ribosome, cytoplasmic	0.578	81	0.835883	structural constituent of ribosome: 1.5e-103	RNA binding: 2.504e-30	rRNA binding: 6.738e-10	mRNA binding: 3.236e-06	fibroblast growth factor binding: 0.006172	translation elongation factor activity: 0.006315	laminin receptor activity: 0.008664	5S rRNA binding: 0.008664	mRNA 5'-UTR binding: 0.01577	metal ion binding: 0.01837	translation regulator activity: 0.02416	DNA binding: 0.03465	protein kinase binding: 0.04265	translation initiation factor binding: 0.04452	protein kinase A binding: 0.05241	translation activator activity: 0.05372	DNA N-glycosylase activity: 0.05631	DNA-(apurinic or apyrimidinic site) lyase activity: 0.064	cysteine-type endopeptidase activator activity involved in apoptotic process: 0.0728	laminin binding: 0.07528	iron-sulfur cluster binding: 0.09341	protein binding: 0.0949
73	60	P62851, P18621, P62854, P62857, P50914, P05388, P62979, P39019, P46782, P62910, P84098, P62424, P30050, P62913, P62280, P61513, P62847, P62753, P62750, P52272, P25398, P62899, Q07020, Q02543, P62266, P62241, P36578, P62244, P62263, Q71UM5, P62249, P62917, Q96L21, P32969, P62906, P39023, P83731, P46777, P23396, P61313, P46778, P62829, P35268, P15880, P08708, P61247, Q12906, P08865, P18124, Q9HCE1,…	0	0	0	0	40S_ribosomal_subunit,_cytoplasmic::Nop56p-associated_pre-rRNA_complex::TRBP_containing_complex_(DICER,_RPL7A,_EIF6,_MOV10_and_subunits_of_the_60S_ribosomal_particle)::DICER1-NCOA6-AGO2_complex::RNA-induced_silencing_complex,_RISC::TRBP_containing_complex_(DICER,_TRBP,_AGO2,_RPL7A,_EIF6,_MOV10)::FIB-associated_protein_complex	0.4198	129	Ribosome, cytoplasmic	0.6	81	0.841064	structural constituent of ribosome: 1.157e-106	RNA binding: 2.972e-33	rRNA binding: 6.738e-10	mRNA binding: 3.236e-06	ATP binding: 0.003443	fibroblast growth factor binding: 0.006172	laminin receptor activity: 0.008664	5S rRNA binding: 0.008664	mRNA 5'-UTR binding: 0.01577	metal ion binding: 0.01837	translation regulator activity: 0.02416	DNA binding: 0.03465	translation initiation factor binding: 0.04452	protein kinase A binding: 0.05241	translation activator activity: 0.05372	DNA N-glycosylase activity: 0.05631	DNA-(apurinic or apyrimidinic site) lyase activity: 0.064	cysteine-type endopeptidase activator activity involved in apoptotic process: 0.0728	laminin binding: 0.07528	protein binding: 0.08227	iron-sulfur cluster binding: 0.09341
118	60	P62851, P18621, P50914, P62857, P05388, P62979, P39019, P37108, Q12906, P62910, P62424, P30050, P62913, P62280, P61513, P62854, P62753, P62750, P52272, P25398, P62899, P46782, Q02543, P62266, P62241, P36578, P62244, P62263, Q71UM5, P62249, P62917, P62277, P32969, P62906, P39023, P83731, P46777, P23396, P61313, P46778, P62829, P35268, P15880, P08708, P61247, P08865, P18124, P84098, P62701, P62847,…	0	0	0	0	40S_ribosomal_subunit,_cytoplasmic::Nop56p-associated_pre-rRNA_complex::TRBP_containing_complex_(DICER,_RPL7A,_EIF6,_MOV10_and_subunits_of_the_60S_ribosomal_particle)::DICER1-NCOA6-AGO2_complex::RNA-induced_silencing_complex,_RISC::TRBP_containing_complex_(DICER,_TRBP,_AGO2,_RPL7A,_EIF6,_MOV10)::FIB-associated_protein_complex	0.4198	129	Ribosome, cytoplasmic	0.6	81	0.840738	structural constituent of ribosome: 1.157e-106	RNA binding: 2.972e-33	rRNA binding: 6.738e-10	mRNA binding: 3.236e-06	fibroblast growth factor binding: 0.006172	laminin receptor activity: 0.008664	5S rRNA binding: 0.008664	endoplasmic reticulum signal peptide binding: 0.01436	mRNA 5'-UTR binding: 0.01577	metal ion binding: 0.01837	translation regulator activity: 0.02416	7S RNA binding: 0.03241	DNA binding: 0.03465	translation initiation factor binding: 0.04452	protein kinase A binding: 0.05241	translation activator activity: 0.05372	DNA N-glycosylase activity: 0.05631	DNA-(apurinic or apyrimidinic site) lyase activity: 0.064	cysteine-type endopeptidase activator activity involved in apoptotic process: 0.0728	laminin binding: 0.07528	iron-sulfur cluster binding: 0.09341	protein binding: 0.0949
367	60	P62851, P18621, P62854, P62857, P50914, Q07020, P05388, P62979, P39019, Q12906, P27635, P62910, P62424, P46776, P61513, P62913, P62280, P30050, P62847, P62753, P62750, P52272, P25398, P62899, P46782, Q02543, P62266, P62241, P36578, P62244, P62263, Q71UM5, P62249, P62917, Q96L21, P32969, P62906, P39023, P83731, P46777, P23396, P61313, P46778, P62829, P35268, P15880, P61247, P08865, P18124, P84098,…	121	10	12	244.818	40S_ribosomal_subunit,_cytoplasmic::Nop56p-associated_pre-rRNA_complex::TRBP_containing_complex_(DICER,_RPL7A,_EIF6,_MOV10_and_subunits_of_the_60S_ribosomal_particle)::DICER1-NCOA6-AGO2_complex::RNA-induced_silencing_complex,_RISC::TRBP_containing_complex_(DICER,_TRBP,_AGO2,_RPL7A,_EIF6,_MOV10)::FIB-associated_protein_complex	0.4198	129	Ribosome, cytoplasmic	0.6	81	0.840082	structural constituent of ribosome: 1.157e-106	RNA binding: 2.972e-33	rRNA binding: 6.738e-10	mRNA binding: 1.671e-07	fibroblast growth factor binding: 0.006172	laminin receptor activity: 0.008664	5S rRNA binding: 0.008664	mRNA 5'-UTR binding: 0.01577	metal ion binding: 0.01837	translation regulator activity: 0.02416	DNA binding: 0.03465	translation initiation factor binding: 0.04452	protein kinase A binding: 0.05241	translation activator activity: 0.05372	DNA N-glycosylase activity: 0.05631	DNA-(apurinic or apyrimidinic site) lyase activity: 0.064	protein binding: 0.06677	cysteine-type endopeptidase activator activity involved in apoptotic process: 0.0728	laminin binding: 0.07528	enzyme binding: 0.08075	iron-sulfur cluster binding: 0.09341
436	60	P62851, P18621, P62854, P62857, P50914, P05388, P62979, P39019, P46782, P62910, P62424, P61513, P62913, P62280, P30050, P62847, P62753, P62750, P52272, P25398, P62899, P62277, Q02543, P62266, P62241, P36578, P62244, P62263, Q71UM5, P62249, P62917, Q96L21, P63220, P62906, P39023, P83731, P46777, P23396, P61313, P46778, P62829, P35268, P15880, P08708, Q9NW13, P61247, Q12906, P08865, P18124, P84098,…	0.25	0	1	237	40S_ribosomal_subunit,_cytoplasmic::Nop56p-associated_pre-rRNA_complex::TRBP_containing_complex_(DICER,_RPL7A,_EIF6,_MOV10_and_subunits_of_the_60S_ribosomal_particle)::DICER1-NCOA6-AGO2_complex::RNA-induced_silencing_complex,_RISC::TRBP_containing_complex_(DICER,_TRBP,_AGO2,_RPL7A,_EIF6,_MOV10)::FIB-associated_protein_complex	0.4198	129	Ribosome, cytoplasmic	0.6	81	0.839836	structural constituent of ribosome: 1.157e-106	RNA binding: 2.972e-33	rRNA binding: 6.738e-10	mRNA binding: 3.236e-06	fibroblast growth factor binding: 0.006172	laminin receptor activity: 0.008664	5S rRNA binding: 0.008664	mRNA 5'-UTR binding: 0.01577	metal ion binding: 0.01837	translation regulator activity: 0.02416	DNA binding: 0.03465	nucleic acid binding: 0.04321	translation initiation factor binding: 0.04452	protein kinase A binding: 0.05241	translation activator activity: 0.05372	DNA N-glycosylase activity: 0.05631	nucleotide binding: 0.06193	DNA-(apurinic or apyrimidinic site) lyase activity: 0.064	cysteine-type endopeptidase activator activity involved in apoptotic process: 0.0728	laminin binding: 0.07528	iron-sulfur cluster binding: 0.09341	protein binding: 0.0949
1666	58	P62851, P30050, P62854, P62857, P50914, P05388, P62979, P39019, P18621, Q12906, P62424, P61513, P62913, P52272, Q02543, P62847, P62753, P62750, P62280, P25398, P62899, P46782, P62081, P62266, P62241, P36578, P62244, P62263, Q71UM5, P62249, P62917, P62277, P32969, P62906, P39023, P83731, P46777, P23396, P55769, P46778, P61313, P62829, P35268, P15880, P08708, Q15287, P61247, P08865, P18124, P84098,…	484	23	21	246.886	40S_ribosomal_subunit,_cytoplasmic::Nop56p-associated_pre-rRNA_complex::TRBP_containing_complex_(DICER,_RPL7A,_EIF6,_MOV10_and_subunits_of_the_60S_ribosomal_particle)::DICER1-NCOA6-AGO2_complex::RNA-induced_silencing_complex,_RISC::TRBP_containing_complex_(DICER,_TRBP,_AGO2,_RPL7A,_EIF6,_MOV10)::FIB-associated_protein_complex	0.4191	129	Ribosome, cytoplasmic	0.5979	81	0.828298	structural constituent of ribosome: 1.096e-99	RNA binding: 1.331e-35	rRNA binding: 5.464e-10	mRNA binding: 2.651e-06	fibroblast growth factor binding: 0.005786	laminin receptor activity: 0.008377	5S rRNA binding: 0.008377	mRNA 5'-UTR binding: 0.01525	metal ion binding: 0.02234	translation regulator activity: 0.02338	snoRNA binding: 0.04052	DNA binding: 0.04071	translation initiation factor binding: 0.0431	nucleic acid binding: 0.04892	protein kinase A binding: 0.05076	translation activator activity: 0.05202	protein binding: 0.05283	DNA N-glycosylase activity: 0.05454	nucleotide binding: 0.05704	DNA-(apurinic or apyrimidinic site) lyase activity: 0.062	cysteine-type endopeptidase activator activity involved in apoptotic process: 0.07055	laminin binding: 0.07296	iron-sulfur cluster binding: 0.0906	NF-kappaB binding: 0.09858
121	63	P62851, P30050, P62854, P62857, P50914, P05388, P08865, P39019, P18621, P46782, P39023, P62424, P61513, P62913, P62280, Q02543, P62847, P62753, Q8IY81, P62241, P52272, P25398, P62899, P62277, P62081, P62266, P61313, Q9Y2X3, P36578, P62244, P62263, Q71UM5, P62249, P62917, Q96L21, P32969, P62906, P62979, P83731, P46777, P23396, P55769, P46778, P08708, P84098, P35268, P15880, P46087, P61247, Q12906,…	342.25	12	25	250.162	40S_ribosomal_subunit,_cytoplasmic::Nop56p-associated_pre-rRNA_complex::TRBP_containing_complex_(DICER,_RPL7A,_EIF6,_MOV10_and_subunits_of_the_60S_ribosomal_particle)::DICER1-NCOA6-AGO2_complex::RNA-induced_silencing_complex,_RISC::TRBP_containing_complex_(DICER,_TRBP,_AGO2,_RPL7A,_EIF6,_MOV10)::FIB-associated_protein_complex	0.4139	129	Ribosome, cytoplasmic	0.5505	81	0.841029	structural constituent of ribosome: 1.647e-100	RNA binding: 4.506e-35	rRNA binding: 9.104e-10	mRNA binding: 4.304e-06	snoRNA binding: 0.0009578	ATP binding: 0.002448	fibroblast growth factor binding: 0.00677	laminin receptor activity: 0.009094	5S rRNA binding: 0.009094	metal ion binding: 0.01362	mRNA 5'-UTR binding: 0.01655	translation regulator activity: 0.02534	S-adenosylmethionine-dependent methyltransferase activity: 0.03255	protein binding: 0.04068	translation initiation factor binding: 0.04664	protein kinase A binding: 0.05489	translation activator activity: 0.05625	DNA binding: 0.05738	DNA N-glycosylase activity: 0.05895	DNA-(apurinic or apyrimidinic site) lyase activity: 0.06697	methyltransferase activity: 0.0713	cysteine-type endopeptidase activator activity involved in apoptotic process: 0.07614	laminin binding: 0.07872	iron-sulfur cluster binding: 0.09758
28	61	P62851, P18621, P50914, P62857, P05388, P62979, P39019, P46782, P62910, P62424, P30050, P62913, P62280, P11940, P62854, P62753, P62750, P52272, P25398, P62899, Q07020, P26373, P62266, P62241, P36578, P62244, P62263, Q71UM5, P62249, P62917, Q96L21, P32969, Q02543, P62906, P39023, P83731, P46777, P23396, P61313, P46778, P62829, P35268, P15880, P08708, P61247, Q12906, P08865, P18124, P68104, P84098,…	100	9	11	236.7	40S_ribosomal_subunit,_cytoplasmic::Nop56p-associated_pre-rRNA_complex::TRBP_containing_complex_(DICER,_RPL7A,_EIF6,_MOV10_and_subunits_of_the_60S_ribosomal_particle)::DICER1-NCOA6-AGO2_complex::RNA-induced_silencing_complex,_RISC::TRBP_containing_complex_(DICER,_TRBP,_AGO2,_RPL7A,_EIF6,_MOV10)::FIB-associated_protein_complex	0.4129	129	Ribosome, cytoplasmic	0.5902	81	0.839514	structural constituent of ribosome: 1.746e-105	RNA binding: 7.185e-33	rRNA binding: 7.462e-10	mRNA binding: 3.565e-06	translation activator activity: 0.001511	fibroblast growth factor binding: 0.006368	laminin receptor activity: 0.008807	5S rRNA binding: 0.008807	mRNA 5'-UTR binding: 0.01603	metal ion binding: 0.01664	translation regulator activity: 0.02456	DNA binding: 0.03193	nucleic acid binding: 0.0406	protein kinase binding: 0.04454	translation initiation factor binding: 0.04523	protein kinase A binding: 0.05324	DNA N-glycosylase activity: 0.05719	nucleotide binding: 0.06441	DNA-(apurinic or apyrimidinic site) lyase activity: 0.06499	poly(A) RNA binding: 0.07011	protein binding: 0.07334	cysteine-type endopeptidase activator activity involved in apoptotic process: 0.07391	laminin binding: 0.07643	iron-sulfur cluster binding: 0.0948
49	61	P62851, P18621, P50914, P62857, P05388, P62979, P39019, P46782, P62910, P84098, P62424, P46776, P61513, P62913, P62280, P30050, P62854, P62753, P62750, P52272, P25398, P62899, Q07020, P26373, P62266, P62241, P36578, P62244, P62263, P62249, P62917, P62277, P32969, Q02543, P62906, P39023, P83731, P46777, P23396, P61313, P46778, P62829, P35268, P15880, P08708, P61247, Q12906, P08865, P18124, P63244,…	210.25	17	12	239.276	40S_ribosomal_subunit,_cytoplasmic::Nop56p-associated_pre-rRNA_complex::TRBP_containing_complex_(DICER,_RPL7A,_EIF6,_MOV10_and_subunits_of_the_60S_ribosomal_particle)::DICER1-NCOA6-AGO2_complex::RNA-induced_silencing_complex,_RISC::TRBP_containing_complex_(DICER,_TRBP,_AGO2,_RPL7A,_EIF6,_MOV10)::FIB-associated_protein_complex	0.4129	129	Ribosome, cytoplasmic	0.6122	81	0.839679	structural constituent of ribosome: 1.321e-108	RNA binding: 7.185e-33	rRNA binding: 7.462e-10	mRNA binding: 3.565e-06	cysteine-type endopeptidase activator activity involved in apoptotic process: 0.002857	fibroblast growth factor binding: 0.006368	laminin receptor activity: 0.008807	5S rRNA binding: 0.008807	protein tyrosine kinase inhibitor activity: 0.01026	mRNA 5'-UTR binding: 0.01603	ion channel inhibitor activity: 0.01603	metal ion binding: 0.01664	translation regulator activity: 0.02456	DNA binding: 0.03193	translation initiation factor binding: 0.04523	protein kinase A binding: 0.05324	translation activator activity: 0.05456	DNA N-glycosylase activity: 0.05719	DNA-(apurinic or apyrimidinic site) lyase activity: 0.06499	protein binding: 0.07334	laminin binding: 0.07643	enzyme binding: 0.08329	iron-sulfur cluster binding: 0.0948
76	61	P62851, P18621, P50914, P62857, P05388, P62979, P39019, P46782, P62910, P62424, P61513, P62913, P62280, Q02543, P62081, P62854, P62753, P62750, P52272, P25398, P62899, Q07020, Q12905, P26373, P62266, P62241, Q7KZF4, P62244, P62263, Q71UM5, P62249, P62917, Q96L21, P32969, P62906, P39023, P83731, P46777, P23396, P61313, P46778, P62829, P35268, P15880, P08708, P61247, Q12906, P08865, P18124, P84098,…	81	5	13	242.389	40S_ribosomal_subunit,_cytoplasmic::Nop56p-associated_pre-rRNA_complex::TRBP_containing_complex_(DICER,_RPL7A,_EIF6,_MOV10_and_subunits_of_the_60S_ribosomal_particle)::DICER1-NCOA6-AGO2_complex::RNA-induced_silencing_complex,_RISC::TRBP_containing_complex_(DICER,_TRBP,_AGO2,_RPL7A,_EIF6,_MOV10)::FIB-associated_protein_complex	0.4129	129	Ribosome, cytoplasmic	0.5902	81	0.842886	structural constituent of ribosome: 1.746e-105	RNA binding: 2.072e-31	rRNA binding: 7.462e-10	mRNA binding: 3.565e-06	ATP binding: 0.003074	fibroblast growth factor binding: 0.006368	laminin receptor activity: 0.008807	5S rRNA binding: 0.008807	double-stranded RNA binding: 0.009078	mRNA 5'-UTR binding: 0.01603	metal ion binding: 0.01664	translation regulator activity: 0.02456	nucleic acid binding: 0.0406	translation initiation factor binding: 0.04523	protein kinase A binding: 0.05324	translation activator activity: 0.05456	DNA N-glycosylase activity: 0.05719	DNA-(apurinic or apyrimidinic site) lyase activity: 0.06499	DNA binding: 0.06549	protein binding: 0.07334	cysteine-type endopeptidase activator activity involved in apoptotic process: 0.07391	laminin binding: 0.07643	nuclease activity: 0.0948	iron-sulfur cluster binding: 0.0948	hydrolase activity acting on ester bonds: 0.096
91	61	P62851, P18621, P62854, P62857, P50914, Q07020, P05388, P62979, P39019, Q12906, P62910, P62424, P61513, P62913, P62280, P30050, P62847, P62753, P62750, P52272, P25398, P62899, P46782, Q02543, P62266, P62241, P36578, P62244, P62263, Q71UM5, P62249, P62917, P24534, Q96L21, P32969, P62906, P39023, P83731, P46777, P23396, P61313, P46778, P62829, P35268, P15880, P08708, P61247, P08865, P18124, P68104,…	132.25	14	9	234.478	40S_ribosomal_subunit,_cytoplasmic::Nop56p-associated_pre-rRNA_complex::TRBP_containing_complex_(DICER,_RPL7A,_EIF6,_MOV10_and_subunits_of_the_60S_ribosomal_particle)::DICER1-NCOA6-AGO2_complex::RNA-induced_silencing_complex,_RISC::TRBP_containing_complex_(DICER,_TRBP,_AGO2,_RPL7A,_EIF6,_MOV10)::FIB-associated_protein_complex	0.4129	129	Ribosome, cytoplasmic	0.5902	81	0.840217	structural constituent of ribosome: 1.746e-105	RNA binding: 2.072e-31	rRNA binding: 7.462e-10	mRNA binding: 3.565e-06	fibroblast growth factor binding: 0.006368	translation elongation factor activity: 0.006516	laminin receptor activity: 0.008807	5S rRNA binding: 0.008807	mRNA 5'-UTR binding: 0.01603	metal ion binding: 0.01664	translation regulator activity: 0.02456	DNA binding: 0.03193	protein kinase binding: 0.04454	translation initiation factor binding: 0.04523	protein kinase A binding: 0.05324	translation activator activity: 0.05456	DNA N-glycosylase activity: 0.05719	DNA-(apurinic or apyrimidinic site) lyase activity: 0.06499	protein binding: 0.07334	cysteine-type endopeptidase activator activity involved in apoptotic process: 0.07391	laminin binding: 0.07643	iron-sulfur cluster binding: 0.0948
1644	61	P62851, P18621, P62854, P62857, P50914, Q07020, P05388, P62979, P39019, Q12906, P62910, P62424, P61513, P62913, P62280, P30050, P62847, P62753, P62750, P52272, P25398, P62899, P46782, Q02543, P62266, P62241, P36578, P62244, P62263, Q71UM5, P62249, P62917, Q96L21, P32969, P62906, P39023, P83731, P46777, P23396, P61313, P46778, P62829, P35268, P15880, P08708, P61247, P08865, P18124, P68104, P84098,…	19740.2	145	136	245.655	40S_ribosomal_subunit,_cytoplasmic::Nop56p-associated_pre-rRNA_complex::TRBP_containing_complex_(DICER,_RPL7A,_EIF6,_MOV10_and_subunits_of_the_60S_ribosomal_particle)::DICER1-NCOA6-AGO2_complex::RNA-induced_silencing_complex,_RISC::TRBP_containing_complex_(DICER,_TRBP,_AGO2,_RPL7A,_EIF6,_MOV10)::FIB-associated_protein_complex	0.4129	129	Ribosome, cytoplasmic	0.5902	81	0.839648	structural constituent of ribosome: 1.746e-105	RNA binding: 2.072e-31	rRNA binding: 7.462e-10	mRNA binding: 1.875e-07	ATP binding: 0.003074	fibroblast growth factor binding: 0.006368	laminin receptor activity: 0.008807	5S rRNA binding: 0.008807	mRNA 5'-UTR binding: 0.01603	metal ion binding: 0.01664	translation regulator activity: 0.02456	DNA binding: 0.03193	nucleic acid binding: 0.0406	protein kinase binding: 0.04454	translation initiation factor binding: 0.04523	protein kinase A binding: 0.05324	translation activator activity: 0.05456	DNA N-glycosylase activity: 0.05719	RNA cap binding: 0.06111	DNA-(apurinic or apyrimidinic site) lyase activity: 0.06499	protein binding: 0.07334	cysteine-type endopeptidase activator activity involved in apoptotic process: 0.07391	laminin binding: 0.07643	iron-sulfur cluster binding: 0.0948
1711	61	P62851, P18621, P50914, P62857, P05388, P62979, P39019, P05141, Q12906, P62910, P62424, P30050, P62913, P62280, P07900, P62847, P62753, P62750, P52272, P25398, P62899, P46782, Q02543, P62266, P62241, P36578, P62244, P62263, Q71UM5, P62249, P62917, P62277, P32969, P62906, P39023, P83731, P46777, P23396, P61313, P46778, P62829, P35268, P15880, P08708, P61247, P08865, P18124, P84098, P62701, P27635,…	0.25	1	0	208	40S_ribosomal_subunit,_cytoplasmic::Nop56p-associated_pre-rRNA_complex::TRBP_containing_complex_(DICER,_RPL7A,_EIF6,_MOV10_and_subunits_of_the_60S_ribosomal_particle)::DICER1-NCOA6-AGO2_complex::RNA-induced_silencing_complex,_RISC::TRBP_containing_complex_(DICER,_TRBP,_AGO2,_RPL7A,_EIF6,_MOV10)::FIB-associated_protein_complex	0.4129	129	Ribosome, cytoplasmic	0.5902	81	0.842568	structural constituent of ribosome: 1.746e-105	RNA binding: 2.072e-31	rRNA binding: 7.462e-10	mRNA binding: 1.875e-07	adenine transmembrane transporter activity: 0.002953	ATP binding: 0.003074	fibroblast growth factor binding: 0.006368	laminin receptor activity: 0.008807	sulfonylurea receptor binding: 0.008807	CTP binding: 0.008807	5S rRNA binding: 0.008807	UTP binding: 0.01171	dATP binding: 0.01459	mRNA 5'-UTR binding: 0.01603	metal ion binding: 0.01664	translation regulator activity: 0.02456	TPR domain binding: 0.03016	DNA binding: 0.03193	nitric-oxide synthase regulator activity: 0.03707	protein kinase binding: 0.04454	translation initiation factor binding: 0.04523	protein kinase A binding: 0.05324	translation activator activity: 0.05456	DNA N-glycosylase activity: 0.05719	nucleotide binding: 0.06441	DNA-(apurinic or apyrimidinic site) lyase activity: 0.06499	protein binding: 0.07334	cysteine-type endopeptidase activator activity involved in apoptotic process: 0.07391	laminin binding: 0.07643	iron-sulfur cluster binding: 0.0948
135	62	P62851, P18621, P62854, P62857, P50914, Q07020, P05388, P62979, P39019, Q12906, P62910, P62424, P61513, P62913, P62280, P30050, P62847, P62753, P62750, P52272, P25398, P62899, P46782, Q02543, P62266, P62241, P36578, P62244, P62263, Q71UM5, P62249, P62917, P24534, Q96L21, P32969, P62906, P39023, P83731, P46777, P23396, P61313, P46778, P62829, P35268, P15880, P08708, P61247, P26641, P08865, P18124,…	57360.2	241	238	245.48	40S_ribosomal_subunit,_cytoplasmic::Nop56p-associated_pre-rRNA_complex::TRBP_containing_complex_(DICER,_RPL7A,_EIF6,_MOV10_and_subunits_of_the_60S_ribosomal_particle)::DICER1-NCOA6-AGO2_complex::RNA-induced_silencing_complex,_RISC::TRBP_containing_complex_(DICER,_TRBP,_AGO2,_RPL7A,_EIF6,_MOV10)::FIB-associated_protein_complex	0.4062	129	Ribosome, cytoplasmic	0.5806	81	0.840541	structural constituent of ribosome: 2.142e-104	RNA binding: 4.7e-31	rRNA binding: 8.249e-10	mRNA binding: 3.92e-06	translation elongation factor activity: 0.0002648	fibroblast growth factor binding: 0.006568	laminin receptor activity: 0.008951	5S rRNA binding: 0.008951	metal ion binding: 0.01506	mRNA 5'-UTR binding: 0.01629	translation regulator activity: 0.02495	DNA binding: 0.0294	translation initiation factor binding: 0.04593	protein kinase binding: 0.04646	protein kinase A binding: 0.05406	translation activator activity: 0.0554	DNA N-glycosylase activity: 0.05807	protein binding: 0.06424	DNA-(apurinic or apyrimidinic site) lyase activity: 0.06598	cysteine-type endopeptidase activator activity involved in apoptotic process: 0.07503	laminin binding: 0.07758	iron-sulfur cluster binding: 0.09619
10	60	P62851, P18621, P50914, P62857, P05388, P62979, P39019, P46782, P62910, P62424, P61513, P62913, P62280, P30050, P62854, P62753, P62750, P52272, P25398, P62899, Q07020, Q02543, P62266, P62241, P36578, P62244, P62263, P63173, Q71UM5, P62249, P62917, Q96L21, P32969, P62906, P39023, P83731, P46777, P23396, P61313, P46778, P62829, P35268, P15880, P08708, P61247, Q12906, P08865, P18124, P84098, P62701,…	0	0	0	0	40S_ribosomal_subunit,_cytoplasmic::Nop56p-associated_pre-rRNA_complex::TRBP_containing_complex_(DICER,_RPL7A,_EIF6,_MOV10_and_subunits_of_the_60S_ribosomal_particle)::DICER1-NCOA6-AGO2_complex::RNA-induced_silencing_complex,_RISC::TRBP_containing_complex_(DICER,_TRBP,_AGO2,_RPL7A,_EIF6,_MOV10)::FIB-associated_protein_complex	0.4052	129	Ribosome, cytoplasmic	0.6224	81	0.842674	structural constituent of ribosome: 6.567e-110	RNA binding: 2.972e-33	rRNA binding: 6.738e-10	mRNA binding: 3.236e-06	fibroblast growth factor binding: 0.006172	laminin receptor activity: 0.008664	5S rRNA binding: 0.008664	mRNA 5'-UTR binding: 0.01577	metal ion binding: 0.01837	translation regulator activity: 0.02416	DNA binding: 0.03465	translation initiation factor binding: 0.04452	protein kinase A binding: 0.05241	translation activator activity: 0.05372	DNA N-glycosylase activity: 0.05631	DNA-(apurinic or apyrimidinic site) lyase activity: 0.064	cysteine-type endopeptidase activator activity involved in apoptotic process: 0.0728	laminin binding: 0.07528	iron-sulfur cluster binding: 0.09341	protein binding: 0.0949
19	60	P62851, P30050, P50914, P62857, P05388, P62979, P39019, P18621, Q12906, P62910, P62424, P61513, P62913, P62280, Q02543, P62847, P62753, P62750, P52272, P25398, P62899, P46782, P62081, P62266, P62241, P36578, P62244, P62263, Q71UM5, P62249, P62917, P62277, P32969, P62906, P39023, P83731, P46777, P23396, P61313, P46778, P08708, P84098, P35268, P15880, P46087, P61247, P08865, P18124, P62829, P62701,…	0	0	0	0	40S_ribosomal_subunit,_cytoplasmic::Nop56p-associated_pre-rRNA_complex::TRBP_containing_complex_(DICER,_RPL7A,_EIF6,_MOV10_and_subunits_of_the_60S_ribosomal_particle)::DICER1-NCOA6-AGO2_complex::RNA-induced_silencing_complex,_RISC::TRBP_containing_complex_(DICER,_TRBP,_AGO2,_RPL7A,_EIF6,_MOV10)::FIB-associated_protein_complex	0.4052	129	Ribosome, cytoplasmic	0.6	81	0.842248	structural constituent of ribosome: 1.157e-106	RNA binding: 2.972e-33	rRNA binding: 6.738e-10	mRNA binding: 3.236e-06	fibroblast growth factor binding: 0.006172	laminin receptor activity: 0.008664	5S rRNA binding: 0.008664	mRNA 5'-UTR binding: 0.01577	metal ion binding: 0.01837	translation regulator activity: 0.02416	S-adenosylmethionine-dependent methyltransferase activity: 0.03105	DNA binding: 0.03465	translation initiation factor binding: 0.04452	protein kinase A binding: 0.05241	translation activator activity: 0.05372	DNA N-glycosylase activity: 0.05631	DNA-(apurinic or apyrimidinic site) lyase activity: 0.064	cysteine-type endopeptidase activator activity involved in apoptotic process: 0.0728	laminin binding: 0.07528	protein binding: 0.08227	iron-sulfur cluster binding: 0.09341
22	60	P62851, P30050, P62854, P62857, P50914, P05388, P62979, P39019, P18621, Q12906, P62910, Q9BYG3, P62424, P61513, P62913, P62280, Q02543, P62847, P62753, P62750, P52272, P25398, P62899, P46782, P26373, P62266, P62241, P36578, P62244, P62263, Q71UM5, P62249, P62917, P62277, P32969, P62906, P39023, P83731, P46777, P23396, P61313, P46778, P62829, P35268, P15880, P08708, P61247, P08865, P18124, P84098,…	0	0	0	0	40S_ribosomal_subunit,_cytoplasmic::Nop56p-associated_pre-rRNA_complex::TRBP_containing_complex_(DICER,_RPL7A,_EIF6,_MOV10_and_subunits_of_the_60S_ribosomal_particle)::DICER1-NCOA6-AGO2_complex::RNA-induced_silencing_complex,_RISC::TRBP_containing_complex_(DICER,_TRBP,_AGO2,_RPL7A,_EIF6,_MOV10)::FIB-associated_protein_complex	0.4052	129	Ribosome, cytoplasmic	0.6	81	0.839431	structural constituent of ribosome: 1.157e-106	RNA binding: 2.972e-33	rRNA binding: 6.738e-10	mRNA binding: 3.236e-06	fibroblast growth factor binding: 0.006172	laminin receptor activity: 0.008664	5S rRNA binding: 0.008664	mRNA 5'-UTR binding: 0.01577	metal ion binding: 0.01837	translation regulator activity: 0.02416	DNA binding: 0.03465	nucleic acid binding: 0.04321	translation initiation factor binding: 0.04452	protein kinase A binding: 0.05241	translation activator activity: 0.05372	DNA N-glycosylase activity: 0.05631	nucleotide binding: 0.06193	DNA-(apurinic or apyrimidinic site) lyase activity: 0.064	cysteine-type endopeptidase activator activity involved in apoptotic process: 0.0728	laminin binding: 0.07528	protein binding: 0.08227	iron-sulfur cluster binding: 0.09341
52	60	P62851, P18621, P62854, P62857, P50914, Q07020, P05388, P62979, P39019, P46782, P62910, P62424, P30050, P62913, P62280, Q02543, P62917, P62753, P62750, Q16540, P52272, P25398, P62899, Q12906, P26373, P62266, P62241, P36578, P62244, P62263, Q71UM5, P62249, Q96L21, P63220, P62906, P39023, P83731, P46777, P23396, P61313, P46778, P62829, P35268, P15880, P08708, P61247, P08865, P18124, P84098, P62701,…	0	0	0	0	40S_ribosomal_subunit,_cytoplasmic::Nop56p-associated_pre-rRNA_complex::TRBP_containing_complex_(DICER,_RPL7A,_EIF6,_MOV10_and_subunits_of_the_60S_ribosomal_particle)::DICER1-NCOA6-AGO2_complex::RNA-induced_silencing_complex,_RISC::TRBP_containing_complex_(DICER,_TRBP,_AGO2,_RPL7A,_EIF6,_MOV10)::FIB-associated_protein_complex	0.4052	129	Ribosome, cytoplasmic	0.6	81	0.841172	structural constituent of ribosome: 6.567e-110	RNA binding: 2.972e-33	rRNA binding: 6.738e-10	mRNA binding: 3.236e-06	fibroblast growth factor binding: 0.006172	laminin receptor activity: 0.008664	5S rRNA binding: 0.008664	mRNA 5'-UTR binding: 0.01577	metal ion binding: 0.01837	translation regulator activity: 0.02416	DNA binding: 0.03465	translation initiation factor binding: 0.04452	protein kinase A binding: 0.05241	translation activator activity: 0.05372	DNA N-glycosylase activity: 0.05631	nucleotide binding: 0.06193	DNA-(apurinic or apyrimidinic site) lyase activity: 0.064	cysteine-type endopeptidase activator activity involved in apoptotic process: 0.0728	laminin binding: 0.07528	iron-sulfur cluster binding: 0.09341	protein binding: 0.0949
54	60	P62851, P18621, P62854, P62857, P05388, P62979, P39019, P46782, P62910, P84098, P62424, P30050, P62913, P62280, Q02543, P50914, P62753, P62750, P52272, P25398, P62899, Q12906, P26373, P62266, P62241, P36578, P62244, P62263, Q71UM5, P62249, P62917, P62277, P63220, P62906, P39023, P83731, P46777, P23396, P61313, P46778, P62829, P35268, P15880, P08708, P61247, P08865, P18124, P52815, P62701, P62847,…	0	0	0	0	40S_ribosomal_subunit,_cytoplasmic::Nop56p-associated_pre-rRNA_complex::TRBP_containing_complex_(DICER,_RPL7A,_EIF6,_MOV10_and_subunits_of_the_60S_ribosomal_particle)::DICER1-NCOA6-AGO2_complex::RNA-induced_silencing_complex,_RISC::TRBP_containing_complex_(DICER,_TRBP,_AGO2,_RPL7A,_EIF6,_MOV10)::FIB-associated_protein_complex	0.4052	129	Ribosome, cytoplasmic	0.6	81	0.840599	structural constituent of ribosome: 6.567e-110	RNA binding: 2.972e-33	rRNA binding: 6.738e-10	mRNA binding: 3.236e-06	fibroblast growth factor binding: 0.006172	laminin receptor activity: 0.008664	5S rRNA binding: 0.008664	mRNA 5'-UTR binding: 0.01577	metal ion binding: 0.01837	translation regulator activity: 0.02416	DNA binding: 0.03465	translation initiation factor binding: 0.04452	protein kinase A binding: 0.05241	translation activator activity: 0.05372	DNA N-glycosylase activity: 0.05631	DNA-(apurinic or apyrimidinic site) lyase activity: 0.064	cysteine-type endopeptidase activator activity involved in apoptotic process: 0.0728	laminin binding: 0.07528	protein binding: 0.08227	iron-sulfur cluster binding: 0.09341
66	60	P62851, P18621, P62854, P62857, P50914, P05388, P62979, P39019, P46782, P62910, P62424, P30050, P62913, P62280, Q02543, P62917, P62753, P62750, P52272, P25398, P62899, P62277, P26373, P62266, P62241, P36578, P62244, P62263, Q71UM5, P62249, P61513, Q96L21, P32969, P62906, P39023, P83731, P46777, P23396, P61313, P46778, P62829, P35268, P15880, P08708, P61247, Q12906, P08865, P18124, P84098, P62701,…	0	0	0	0	40S_ribosomal_subunit,_cytoplasmic::Nop56p-associated_pre-rRNA_complex::TRBP_containing_complex_(DICER,_RPL7A,_EIF6,_MOV10_and_subunits_of_the_60S_ribosomal_particle)::DICER1-NCOA6-AGO2_complex::RNA-induced_silencing_complex,_RISC::TRBP_containing_complex_(DICER,_TRBP,_AGO2,_RPL7A,_EIF6,_MOV10)::FIB-associated_protein_complex	0.4052	129	Ribosome, cytoplasmic	0.6	81	0.839945	structural constituent of ribosome: 1.157e-106	RNA binding: 8.927e-32	rRNA binding: 6.738e-10	mRNA binding: 1.671e-07	ATP binding: 0.003443	fibroblast growth factor binding: 0.006172	laminin receptor activity: 0.008664	5S rRNA binding: 0.008664	mRNA 5'-UTR binding: 0.01577	metal ion binding: 0.01837	translation regulator activity: 0.02416	DNA binding: 0.03465	nucleic acid binding: 0.04321	translation initiation factor binding: 0.04452	protein kinase A binding: 0.05241	translation activator activity: 0.05372	DNA N-glycosylase activity: 0.05631	RNA cap binding: 0.06017	DNA-(apurinic or apyrimidinic site) lyase activity: 0.064	cysteine-type endopeptidase activator activity involved in apoptotic process: 0.0728	laminin binding: 0.07528	protein binding: 0.08227	iron-sulfur cluster binding: 0.09341
93	60	P62851, P18621, P62854, P62857, P50914, P05388, P62979, P39019, Q12906, P62910, P62424, P61513, P62913, P62280, P30050, P62847, P62753, P62750, P52272, P25398, P62899, P46782, Q02543, P62266, P62241, P36578, P62244, P62263, Q71UM5, P62249, P62917, P62277, P32969, P62906, P39023, P83731, P46777, P23396, P61313, P46778, P62829, P35268, P15880, P08708, P61247, P08865, P18124, P06576, P84098, P62701,…	0.25	1	0	187	40S_ribosomal_subunit,_cytoplasmic::Nop56p-associated_pre-rRNA_complex::TRBP_containing_complex_(DICER,_RPL7A,_EIF6,_MOV10_and_subunits_of_the_60S_ribosomal_particle)::DICER1-NCOA6-AGO2_complex::RNA-induced_silencing_complex,_RISC::TRBP_containing_complex_(DICER,_TRBP,_AGO2,_RPL7A,_EIF6,_MOV10)::FIB-associated_protein_complex	0.4052	129	Ribosome, cytoplasmic	0.6	81	0.840055	structural constituent of ribosome: 1.157e-106	RNA binding: 8.927e-32	rRNA binding: 6.738e-10	mRNA binding: 3.236e-06	ATP binding: 0.003443	fibroblast growth factor binding: 0.006172	laminin receptor activity: 0.008664	5S rRNA binding: 0.008664	mRNA 5'-UTR binding: 0.01577	metal ion binding: 0.01837	translation regulator activity: 0.02416	DNA binding: 0.03465	translation initiation factor binding: 0.04452	proton-transporting ATP synthase activity rotational mechanism: 0.04717	protein kinase A binding: 0.05241	translation activator activity: 0.05372	DNA N-glycosylase activity: 0.05631	DNA-(apurinic or apyrimidinic site) lyase activity: 0.064	MHC class I protein binding: 0.06527	proton-transporting ATPase activity rotational mechanism: 0.06779	cysteine-type endopeptidase activator activity involved in apoptotic process: 0.0728	laminin binding: 0.07528	protein binding: 0.08227	iron-sulfur cluster binding: 0.09341
131	60	P62851, P18621, P50914, P62857, P05388, P62979, P39019, P46782, P62424, P61513, P62913, P62280, Q02543, Q9UHX1, P62854, P62753, P62750, P52272, P25398, P62899, Q07020, Q12905, P26373, P62266, P62241, P36578, P62244, P62263, Q71UM5, P62249, P62917, Q96L21, P32969, P62906, P39023, P83731, P46777, P23396, P61313, P46778, P62829, P35268, P15880, P08708, P61247, Q12906, P08865, P18124, P84098, P62701,…	650.25	25	26	249.039	40S_ribosomal_subunit,_cytoplasmic::Nop56p-associated_pre-rRNA_complex::TRBP_containing_complex_(DICER,_RPL7A,_EIF6,_MOV10_and_subunits_of_the_60S_ribosomal_particle)::DICER1-NCOA6-AGO2_complex::RNA-induced_silencing_complex,_RISC::TRBP_containing_complex_(DICER,_TRBP,_AGO2,_RPL7A,_EIF6,_MOV10)::FIB-associated_protein_complex	0.4052	129	Ribosome, cytoplasmic	0.578	81	0.843448	structural constituent of ribosome: 1.5e-103	RNA binding: 2.972e-33	rRNA binding: 6.738e-10	mRNA binding: 3.236e-06	ATP binding: 0.003443	fibroblast growth factor binding: 0.006172	laminin receptor activity: 0.008664	5S rRNA binding: 0.008664	double-stranded RNA binding: 0.008801	mRNA 5'-UTR binding: 0.01577	metal ion binding: 0.01837	translation regulator activity: 0.02416	nucleic acid binding: 0.04321	translation initiation factor binding: 0.04452	protein kinase A binding: 0.05241	translation activator activity: 0.05372	DNA N-glycosylase activity: 0.05631	nucleotide binding: 0.06193	DNA-(apurinic or apyrimidinic site) lyase activity: 0.064	protein binding: 0.06677	cysteine-type endopeptidase activator activity involved in apoptotic process: 0.0728	laminin binding: 0.07528	iron-sulfur cluster binding: 0.09341
150	60	P62851, P30050, P62854, P62857, P50914, P05388, P62979, P39019, P18621, Q12906, P62424, P61513, P62913, P52272, Q02543, P62847, P62753, P62750, P62280, P25398, P62899, P46782, P62081, P62266, P62241, P36578, P62244, P62263, Q71UM5, P62249, P62917, P62277, P32969, P62906, P39023, P83731, P46777, P23396, P55769, P46778, P61313, P84098, P35268, P15880, P08708, Q15287, P61247, P08865, P18124, P62829,…	0	0	0	0	40S_ribosomal_subunit,_cytoplasmic::Nop56p-associated_pre-rRNA_complex::TRBP_containing_complex_(DICER,_RPL7A,_EIF6,_MOV10_and_subunits_of_the_60S_ribosomal_particle)::DICER1-NCOA6-AGO2_complex::RNA-induced_silencing_complex,_RISC::TRBP_containing_complex_(DICER,_TRBP,_AGO2,_RPL7A,_EIF6,_MOV10)::FIB-associated_protein_complex	0.4052	129	Ribosome, cytoplasmic	0.578	81	0.838931	structural constituent of ribosome: 1.5e-103	RNA binding: 9.226e-35	rRNA binding: 6.738e-10	mRNA binding: 3.236e-06	fibroblast growth factor binding: 0.006172	laminin receptor activity: 0.008664	5S rRNA binding: 0.008664	mRNA 5'-UTR binding: 0.01577	metal ion binding: 0.01837	translation regulator activity: 0.02416	DNA binding: 0.03465	snoRNA binding: 0.04186	nucleic acid binding: 0.04321	translation initiation factor binding: 0.04452	protein kinase A binding: 0.05241	translation activator activity: 0.05372	DNA N-glycosylase activity: 0.05631	nucleotide binding: 0.06193	DNA-(apurinic or apyrimidinic site) lyase activity: 0.064	protein binding: 0.06677	cysteine-type endopeptidase activator activity involved in apoptotic process: 0.0728	laminin binding: 0.07528	iron-sulfur cluster binding: 0.09341
250	60	P62851, P18621, P50914, P62857, P05388, P62979, P19022, P46782, P62910, P62424, P30050, P62913, P62280, Q02543, P62917, P62753, P62750, P52272, P25398, P62899, P62277, P26373, P62266, P62241, P36578, P62244, P62263, Q71UM5, P62249, Q96L21, P63220, P62906, P39023, P83731, P46777, P23396, P61313, P39019, P46778, P62829, P35268, P15880, P08708, P61247, Q12906, P08865, P18124, P84098, P62701, P62847,…	0	0	0	0	40S_ribosomal_subunit,_cytoplasmic::Nop56p-associated_pre-rRNA_complex::TRBP_containing_complex_(DICER,_RPL7A,_EIF6,_MOV10_and_subunits_of_the_60S_ribosomal_particle)::DICER1-NCOA6-AGO2_complex::RNA-induced_silencing_complex,_RISC::TRBP_containing_complex_(DICER,_TRBP,_AGO2,_RPL7A,_EIF6,_MOV10)::FIB-associated_protein_complex	0.4052	129	Ribosome, cytoplasmic	0.6	81	0.838798	structural constituent of ribosome: 1.157e-106	RNA binding: 8.927e-32	rRNA binding: 6.738e-10	mRNA binding: 3.236e-06	fibroblast growth factor binding: 0.006172	laminin receptor activity: 0.008664	5S rRNA binding: 0.008664	mRNA 5'-UTR binding: 0.01577	metal ion binding: 0.01837	translation regulator activity: 0.02416	DNA binding: 0.03465	translation initiation factor binding: 0.04452	alpha-catenin binding: 0.04848	protein kinase A binding: 0.05241	translation activator activity: 0.05372	DNA N-glycosylase activity: 0.05631	DNA-(apurinic or apyrimidinic site) lyase activity: 0.064	cysteine-type endopeptidase activator activity involved in apoptotic process: 0.0728	laminin binding: 0.07528	protein binding: 0.08227	iron-sulfur cluster binding: 0.09341
258	60	P62851, P18621, P50914, P62857, P05388, P62979, P39019, Q12906, P62910, P62424, P30050, P62913, P62280, P61513, P62081, P62854, P62753, P62750, P52272, P25398, P62899, P46782, Q02543, P62266, P62241, Q15185, P62244, P62263, Q71UM5, P62249, P62917, P62277, P32969, P62906, P39023, P83731, P46777, P23396, P61313, P46778, P62829, P35268, P15880, P08708, P61247, P08865, P18124, P84098, P62701, P62847,…	1	1	1	232.5	40S_ribosomal_subunit,_cytoplasmic::Nop56p-associated_pre-rRNA_complex::TRBP_containing_complex_(DICER,_RPL7A,_EIF6,_MOV10_and_subunits_of_the_60S_ribosomal_particle)::DICER1-NCOA6-AGO2_complex::RNA-induced_silencing_complex,_RISC::TRBP_containing_complex_(DICER,_TRBP,_AGO2,_RPL7A,_EIF6,_MOV10)::FIB-associated_protein_complex	0.4052	129	Ribosome, cytoplasmic	0.6	81	0.84052	structural constituent of ribosome: 1.157e-106	RNA binding: 8.927e-32	rRNA binding: 6.738e-10	mRNA binding: 3.236e-06	fibroblast growth factor binding: 0.006172	laminin receptor activity: 0.008664	prostaglandin-E synthase activity: 0.008664	5S rRNA binding: 0.008664	mRNA 5'-UTR binding: 0.01577	metal ion binding: 0.01837	telomerase activity: 0.02138	translation regulator activity: 0.02416	DNA binding: 0.03465	translation initiation factor binding: 0.04452	protein kinase A binding: 0.05241	translation activator activity: 0.05372	DNA N-glycosylase activity: 0.05631	DNA-(apurinic or apyrimidinic site) lyase activity: 0.064	cysteine-type endopeptidase activator activity involved in apoptotic process: 0.0728	laminin binding: 0.07528	protein binding: 0.08227	iron-sulfur cluster binding: 0.09341
260	60	P62851, P18621, P62854, P62857, P50914, Q07020, P05388, P62979, P39019, Q12906, P07355, P62424, P46776, P61513, P62913, P62280, P30050, P62847, P62753, P62750, P52272, P25398, P62899, P46782, Q02543, P62266, P62241, P36578, P62244, P62263, Q71UM5, P62249, P62917, Q96L21, P32969, P62906, P39023, P83731, P46777, P23396, P61313, P46778, P62829, P35268, P15880, P08708, P61247, P08865, P18124, P84098,…	16900	124	136	232.665	40S_ribosomal_subunit,_cytoplasmic::Nop56p-associated_pre-rRNA_complex::TRBP_containing_complex_(DICER,_RPL7A,_EIF6,_MOV10_and_subunits_of_the_60S_ribosomal_particle)::DICER1-NCOA6-AGO2_complex::RNA-induced_silencing_complex,_RISC::TRBP_containing_complex_(DICER,_TRBP,_AGO2,_RPL7A,_EIF6,_MOV10)::FIB-associated_protein_complex	0.4052	129	Ribosome, cytoplasmic	0.6	81	0.843151	structural constituent of ribosome: 1.157e-106	RNA binding: 2.972e-33	rRNA binding: 6.738e-10	mRNA binding: 3.236e-06	fibroblast growth factor binding: 0.006172	laminin receptor activity: 0.008664	5S rRNA binding: 0.008664	mRNA 5'-UTR binding: 0.01577	metal ion binding: 0.01837	translation regulator activity: 0.02416	DNA binding: 0.03465	translation initiation factor binding: 0.04452	protein kinase A binding: 0.05241	translation activator activity: 0.05372	DNA N-glycosylase activity: 0.05631	DNA-(apurinic or apyrimidinic site) lyase activity: 0.064	protein binding: 0.06677	phospholipase inhibitor activity: 0.06905	cysteine-type endopeptidase activator activity involved in apoptotic process: 0.0728	laminin binding: 0.07528	iron-sulfur cluster binding: 0.09341
274	60	P62851, P18621, P62854, P62857, P50914, Q07020, P05388, P62979, P39019, Q12906, P82912, P62424, P61513, P62913, P62280, P30050, P62847, P62753, P62750, P52272, P25398, P62899, P46782, Q02543, P62266, P62241, P36578, P62244, P62263, P62910, Q71UM5, P62249, P62917, Q96L21, P32969, P62906, P39023, P83731, P46777, P23396, P61313, P46778, P62829, P35268, P15880, P08708, P61247, P08865, P18124, P84098,…	0	0	0	0	40S_ribosomal_subunit,_cytoplasmic::Nop56p-associated_pre-rRNA_complex::TRBP_containing_complex_(DICER,_RPL7A,_EIF6,_MOV10_and_subunits_of_the_60S_ribosomal_particle)::DICER1-NCOA6-AGO2_complex::RNA-induced_silencing_complex,_RISC::TRBP_containing_complex_(DICER,_TRBP,_AGO2,_RPL7A,_EIF6,_MOV10)::FIB-associated_protein_complex	0.4052	129	Ribosome, cytoplasmic	0.6	81	0.840738	structural constituent of ribosome: 6.567e-110	RNA binding: 8.927e-32	rRNA binding: 6.738e-10	mRNA binding: 3.236e-06	fibroblast growth factor binding: 0.006172	laminin receptor activity: 0.008664	5S rRNA binding: 0.008664	mRNA 5'-UTR binding: 0.01577	metal ion binding: 0.01837	translation regulator activity: 0.02416	DNA binding: 0.03465	translation initiation factor binding: 0.04452	protein kinase A binding: 0.05241	translation activator activity: 0.05372	DNA N-glycosylase activity: 0.05631	DNA-(apurinic or apyrimidinic site) lyase activity: 0.064	cysteine-type endopeptidase activator activity involved in apoptotic process: 0.0728	laminin binding: 0.07528	iron-sulfur cluster binding: 0.09341	protein binding: 0.0949
321	60	P62851, P18621, P62854, P62857, P50914, P05388, P62979, P39019, P31153, P62910, P62424, P46776, P61513, P62913, P62280, P30050, P62847, P62753, P62750, P25398, P62899, P46782, Q02543, P62266, P62241, P36578, P62244, P62263, Q71UM5, P62249, P62917, P62277, P32969, P62906, P39023, P83731, P46777, P23396, P61313, P46778, P62829, P35268, P15880, P08708, P61247, Q12906, P08865, P18124, P84098, P62701,…	441	22	20	241	40S_ribosomal_subunit,_cytoplasmic::Nop56p-associated_pre-rRNA_complex::TRBP_containing_complex_(DICER,_RPL7A,_EIF6,_MOV10_and_subunits_of_the_60S_ribosomal_particle)::DICER1-NCOA6-AGO2_complex::RNA-induced_silencing_complex,_RISC::TRBP_containing_complex_(DICER,_TRBP,_AGO2,_RPL7A,_EIF6,_MOV10)::FIB-associated_protein_complex	0.4052	129	Ribosome, cytoplasmic	0.6224	81	0.84225	structural constituent of ribosome: 6.567e-110	RNA binding: 8.927e-32	rRNA binding: 6.738e-10	mRNA binding: 3.236e-06	ATP binding: 0.003443	methionine adenosyltransferase activity: 0.005793	fibroblast growth factor binding: 0.006172	laminin receptor activity: 0.008664	5S rRNA binding: 0.008664	mRNA 5'-UTR binding: 0.01577	translation regulator activity: 0.02416	DNA binding: 0.03465	metal ion binding: 0.04219	translation initiation factor binding: 0.04452	protein kinase A binding: 0.05241	translation activator activity: 0.05372	DNA N-glycosylase activity: 0.05631	DNA-(apurinic or apyrimidinic site) lyase activity: 0.064	cysteine-type endopeptidase activator activity involved in apoptotic process: 0.0728	laminin binding: 0.07528	protein binding: 0.08227	iron-sulfur cluster binding: 0.09341
351	60	P62851, P18621, P62854, P62857, P50914, P05388, P62979, P39019, Q12906, P62910, P62424, P61513, P62913, P62280, P30050, P62847, P62753, P62750, P52272, P25398, P62899, P46782, Q02543, P62266, P62241, P36578, P62244, P62263, Q71UM5, P62249, P62917, P62277, P32969, P62906, P39023, P83731, P46777, P23396, P61313, P46778, P62829, P35268, P15880, P60866, P08708, P61247, P08865, P18124, P84098, P62701,…	0	0	0	0	40S_ribosomal_subunit,_cytoplasmic::Nop56p-associated_pre-rRNA_complex::TRBP_containing_complex_(DICER,_RPL7A,_EIF6,_MOV10_and_subunits_of_the_60S_ribosomal_particle)::DICER1-NCOA6-AGO2_complex::RNA-induced_silencing_complex,_RISC::TRBP_containing_complex_(DICER,_TRBP,_AGO2,_RPL7A,_EIF6,_MOV10)::FIB-associated_protein_complex	0.4052	129	Ribosome, cytoplasmic	0.6	81	0.84052	structural constituent of ribosome: 1.157e-106	RNA binding: 8.927e-32	rRNA binding: 6.738e-10	mRNA binding: 3.236e-06	fibroblast growth factor binding: 0.006172	laminin receptor activity: 0.008664	5S rRNA binding: 0.008664	mRNA 5'-UTR binding: 0.01577	metal ion binding: 0.01837	translation regulator activity: 0.02416	DNA binding: 0.03465	translation initiation factor binding: 0.04452	protein kinase A binding: 0.05241	translation activator activity: 0.05372	DNA N-glycosylase activity: 0.05631	DNA-(apurinic or apyrimidinic site) lyase activity: 0.064	cysteine-type endopeptidase activator activity involved in apoptotic process: 0.0728	laminin binding: 0.07528	protein binding: 0.08227	iron-sulfur cluster binding: 0.09341
364	60	P62851, P18621, P62854, P62857, P50914, P05388, P62979, P39019, Q12906, P62910, P62424, P61513, P62913, P62280, P30050, P62847, P62753, P62750, P52272, P25398, P62899, P46782, Q02543, P62266, P62241, P36578, P62244, P62263, Q71UM5, P62249, P62917, P62277, P32969, P62906, P39023, P83731, P46777, P23396, P61313, P46778, P08708, P62829, P35268, P15880, O60783, P61247, P08865, P18124, P84098, P62701,…	0	0	0	0	40S_ribosomal_subunit,_cytoplasmic::Nop56p-associated_pre-rRNA_complex::TRBP_containing_complex_(DICER,_RPL7A,_EIF6,_MOV10_and_subunits_of_the_60S_ribosomal_particle)::DICER1-NCOA6-AGO2_complex::RNA-induced_silencing_complex,_RISC::TRBP_containing_complex_(DICER,_TRBP,_AGO2,_RPL7A,_EIF6,_MOV10)::FIB-associated_protein_complex	0.4052	129	Ribosome, cytoplasmic	0.6	81	0.84052	structural constituent of ribosome: 6.567e-110	RNA binding: 8.927e-32	rRNA binding: 6.738e-10	mRNA binding: 3.236e-06	fibroblast growth factor binding: 0.006172	laminin receptor activity: 0.008664	5S rRNA binding: 0.008664	mRNA 5'-UTR binding: 0.01577	metal ion binding: 0.01837	translation regulator activity: 0.02416	DNA binding: 0.03465	translation initiation factor binding: 0.04452	protein kinase A binding: 0.05241	translation activator activity: 0.05372	DNA N-glycosylase activity: 0.05631	DNA-(apurinic or apyrimidinic site) lyase activity: 0.064	cysteine-type endopeptidase activator activity involved in apoptotic process: 0.0728	laminin binding: 0.07528	iron-sulfur cluster binding: 0.09341	protein binding: 0.0949
376	60	P62851, P18621, P62854, P62857, P05388, P62979, P39019, P46782, P62910, P62424, P30050, P62913, P62280, P07900, P50914, P62753, P62750, P52272, P25398, P62899, Q07020, Q02543, P62266, P62241, P36578, P62244, P62263, Q71UM5, P62249, P62917, Q96L21, P32969, P62906, P39023, P83731, P46777, P23396, P61313, P46778, P62829, P35268, P15880, P08708, P61247, Q12906, P08865, P18124, P84098, P62701, P62847,…	0	0	0	0	40S_ribosomal_subunit,_cytoplasmic::Nop56p-associated_pre-rRNA_complex::TRBP_containing_complex_(DICER,_RPL7A,_EIF6,_MOV10_and_subunits_of_the_60S_ribosomal_particle)::DICER1-NCOA6-AGO2_complex::RNA-induced_silencing_complex,_RISC::TRBP_containing_complex_(DICER,_TRBP,_AGO2,_RPL7A,_EIF6,_MOV10)::FIB-associated_protein_complex	0.4052	129	Ribosome, cytoplasmic	0.6	81	0.840738	structural constituent of ribosome: 1.157e-106	RNA binding: 8.927e-32	rRNA binding: 6.738e-10	mRNA binding: 1.671e-07	ATP binding: 0.003443	fibroblast growth factor binding: 0.006172	laminin receptor activity: 0.008664	sulfonylurea receptor binding: 0.008664	CTP binding: 0.008664	5S rRNA binding: 0.008664	UTP binding: 0.01152	dATP binding: 0.01436	mRNA 5'-UTR binding: 0.01577	metal ion binding: 0.01837	translation regulator activity: 0.02416	TPR domain binding: 0.02968	DNA binding: 0.03465	nitric-oxide synthase regulator activity: 0.03648	protein kinase binding: 0.04265	translation initiation factor binding: 0.04452	protein kinase A binding: 0.05241	translation activator activity: 0.05372	DNA N-glycosylase activity: 0.05631	nucleotide binding: 0.06193	DNA-(apurinic or apyrimidinic site) lyase activity: 0.064	cysteine-type endopeptidase activator activity involved in apoptotic process: 0.0728	laminin binding: 0.07528	protein binding: 0.08227	iron-sulfur cluster binding: 0.09341
441	60	P62851, P30050, P50914, P62857, Q07020, P05388, P62979, P39019, P18621, Q12906, P62910, P62424, P61513, P62913, P62280, Q02543, P05387, P62753, P62750, P25398, P62899, P46782, P26373, P62266, P62241, P36578, P62244, P62263, Q71UM5, P62249, P62917, Q96L21, P32969, P62906, P39023, P83731, P62847, P23396, P61313, P46778, P62829, P35268, P15880, P08708, P46777, P61247, P08865, P18124, P84098, P62987,…	0.25	0	1	214	40S_ribosomal_subunit,_cytoplasmic::Nop56p-associated_pre-rRNA_complex::TRBP_containing_complex_(DICER,_RPL7A,_EIF6,_MOV10_and_subunits_of_the_60S_ribosomal_particle)::DICER1-NCOA6-AGO2_complex::RNA-induced_silencing_complex,_RISC::TRBP_containing_complex_(DICER,_TRBP,_AGO2,_RPL7A,_EIF6,_MOV10)::FIB-associated_protein_complex	0.4052	129	Ribosome, cytoplasmic	0.6453	81	0.838023	structural constituent of ribosome: 2.437e-113	RNA binding: 8.927e-32	rRNA binding: 6.738e-10	mRNA binding: 3.236e-06	fibroblast growth factor binding: 0.006172	laminin receptor activity: 0.008664	5S rRNA binding: 0.008664	mRNA 5'-UTR binding: 0.01577	metal ion binding: 0.01837	translation regulator activity: 0.02416	DNA binding: 0.03465	translation initiation factor binding: 0.04452	protein kinase A binding: 0.05241	translation activator activity: 0.05372	DNA N-glycosylase activity: 0.05631	DNA-(apurinic or apyrimidinic site) lyase activity: 0.064	cysteine-type endopeptidase activator activity involved in apoptotic process: 0.0728	laminin binding: 0.07528	iron-sulfur cluster binding: 0.09341	protein binding: 0.0949
485	60	P62851, P18621, P62854, P62857, P50914, P05388, P62979, P39019, Q12906, P62910, P39023, P62424, P61513, P62913, P62280, P30050, P62847, P62753, P62750, P52272, P25398, P62899, P46782, Q02543, P62266, P62241, P36578, P62244, P62263, Q71UM5, P62249, P62917, P62277, P32969, P62906, P12235, P83731, P46777, P23396, P61313, P46778, P62829, P35268, P15880, P08708, P61247, P08865, P18124, P84098, P62701,…	0	0	0	0	40S_ribosomal_subunit,_cytoplasmic::Nop56p-associated_pre-rRNA_complex::TRBP_containing_complex_(DICER,_RPL7A,_EIF6,_MOV10_and_subunits_of_the_60S_ribosomal_particle)::DICER1-NCOA6-AGO2_complex::RNA-induced_silencing_complex,_RISC::TRBP_containing_complex_(DICER,_TRBP,_AGO2,_RPL7A,_EIF6,_MOV10)::FIB-associated_protein_complex	0.4052	129	Ribosome, cytoplasmic	0.6	81	0.840629	structural constituent of ribosome: 1.157e-106	RNA binding: 8.927e-32	rRNA binding: 6.738e-10	mRNA binding: 3.236e-06	adenine transmembrane transporter activity: 0.002905	fibroblast growth factor binding: 0.006172	laminin receptor activity: 0.008664	5S rRNA binding: 0.008664	mRNA 5'-UTR binding: 0.01577	metal ion binding: 0.01837	translation regulator activity: 0.02416	DNA binding: 0.03465	translation initiation factor binding: 0.04452	protein kinase A binding: 0.05241	translation activator activity: 0.05372	DNA N-glycosylase activity: 0.05631	DNA-(apurinic or apyrimidinic site) lyase activity: 0.064	cysteine-type endopeptidase activator activity involved in apoptotic process: 0.0728	laminin binding: 0.07528	protein binding: 0.08227	iron-sulfur cluster binding: 0.09341
533	60	P62851, P18621, P62854, P62857, P50914, P05388, P62979, P39019, Q12906, P62910, P20671, P62424, P61513, P62913, P62280, P30050, P62847, P62753, P62750, P52272, P25398, P62899, P46782, Q02543, P62266, P62241, P36578, P62244, P62263, Q71UM5, P62249, P62917, P62277, P32969, P62906, P39023, P83731, P46777, P23396, P61313, P46778, P62829, P35268, P15880, P08708, P61247, P08865, P18124, P84098, P62701,…	0	0	0	0	40S_ribosomal_subunit,_cytoplasmic::Nop56p-associated_pre-rRNA_complex::TRBP_containing_complex_(DICER,_RPL7A,_EIF6,_MOV10_and_subunits_of_the_60S_ribosomal_particle)::DICER1-NCOA6-AGO2_complex::RNA-induced_silencing_complex,_RISC::TRBP_containing_complex_(DICER,_TRBP,_AGO2,_RPL7A,_EIF6,_MOV10)::FIB-associated_protein_complex	0.4052	129	Ribosome, cytoplasmic	0.6	81	0.839836	structural constituent of ribosome: 1.157e-106	RNA binding: 8.927e-32	rRNA binding: 6.738e-10	mRNA binding: 3.236e-06	fibroblast growth factor binding: 0.006172	laminin receptor activity: 0.008664	5S rRNA binding: 0.008664	mRNA 5'-UTR binding: 0.01577	metal ion binding: 0.01837	translation regulator activity: 0.02416	translation initiation factor binding: 0.04452	protein kinase A binding: 0.05241	translation activator activity: 0.05372	DNA N-glycosylase activity: 0.05631	DNA-(apurinic or apyrimidinic site) lyase activity: 0.064	DNA binding: 0.06985	cysteine-type endopeptidase activator activity involved in apoptotic process: 0.0728	laminin binding: 0.07528	iron-sulfur cluster binding: 0.09341	protein binding: 0.0949
1726	60	P62851, P18621, P62854, P62857, P50914, P05388, P62979, P39019, Q12906, P62910, P62424, P46776, P61513, P62913, P62280, P30050, P62847, P62753, P62750, P25398, P62899, P46782, Q02543, P62266, P62241, P36578, P62244, P62263, Q71UM5, P62249, P62917, P62277, P32969, P62906, P39023, P83731, P46777, P23396, P61313, P46778, P62829, P35268, P15880, P08708, P61247, P08865, P18124, P84098, P62987, P27635,…	1	1	1	244	40S_ribosomal_subunit,_cytoplasmic::Nop56p-associated_pre-rRNA_complex::TRBP_containing_complex_(DICER,_RPL7A,_EIF6,_MOV10_and_subunits_of_the_60S_ribosomal_particle)::DICER1-NCOA6-AGO2_complex::RNA-induced_silencing_complex,_RISC::TRBP_containing_complex_(DICER,_TRBP,_AGO2,_RPL7A,_EIF6,_MOV10)::FIB-associated_protein_complex	0.4052	129	Ribosome, cytoplasmic	0.6453	81	0.84225	structural constituent of ribosome: 2.437e-113	RNA binding: 8.927e-32	rRNA binding: 6.738e-10	mRNA binding: 3.236e-06	fibroblast growth factor binding: 0.006172	laminin receptor activity: 0.008664	5S rRNA binding: 0.008664	mRNA 5'-UTR binding: 0.01577	metal ion binding: 0.01837	translation regulator activity: 0.02416	DNA binding: 0.03465	translation initiation factor binding: 0.04452	protein kinase A binding: 0.05241	translation activator activity: 0.05372	DNA N-glycosylase activity: 0.05631	DNA-(apurinic or apyrimidinic site) lyase activity: 0.064	cysteine-type endopeptidase activator activity involved in apoptotic process: 0.0728	laminin binding: 0.07528	protein binding: 0.08227	iron-sulfur cluster binding: 0.09341
1736	60	P62851, P18621, P62854, P62857, P50914, P05388, P62979, Q8IXI1, Q12906, P62910, P62424, P61513, P62913, P62280, P30050, P62847, P62753, P62750, P52272, P25398, P62899, P46782, Q02543, P62266, P62241, P36578, P62244, P62263, Q71UM5, P62249, P62917, P62277, P32969, P62906, P39023, P83731, P46777, P23396, P61313, P39019, P46778, P62829, P35268, P15880, P08708, P61247, P08865, P18124, P84098, P62701,…	0	0	0	0	40S_ribosomal_subunit,_cytoplasmic::Nop56p-associated_pre-rRNA_complex::TRBP_containing_complex_(DICER,_RPL7A,_EIF6,_MOV10_and_subunits_of_the_60S_ribosomal_particle)::DICER1-NCOA6-AGO2_complex::RNA-induced_silencing_complex,_RISC::TRBP_containing_complex_(DICER,_TRBP,_AGO2,_RPL7A,_EIF6,_MOV10)::FIB-associated_protein_complex	0.4052	129	Ribosome, cytoplasmic	0.6	81	0.84052	structural constituent of ribosome: 1.157e-106	RNA binding: 8.927e-32	rRNA binding: 6.738e-10	mRNA binding: 3.236e-06	fibroblast growth factor binding: 0.006172	laminin receptor activity: 0.008664	5S rRNA binding: 0.008664	mRNA 5'-UTR binding: 0.01577	metal ion binding: 0.01837	translation regulator activity: 0.02416	DNA binding: 0.03465	translation initiation factor binding: 0.04452	protein kinase A binding: 0.05241	translation activator activity: 0.05372	DNA N-glycosylase activity: 0.05631	DNA-(apurinic or apyrimidinic site) lyase activity: 0.064	cysteine-type endopeptidase activator activity involved in apoptotic process: 0.0728	laminin binding: 0.07528	protein binding: 0.08227	iron-sulfur cluster binding: 0.09341
498	59	P62851, P18621, P50914, Q07020, P05388, P62979, P39019, P46782, P62910, P62424, P46776, P30050, P62913, P62280, Q02543, P62854, P62753, P62750, P25398, P62899, Q12906, Q12905, P26373, P62266, P62241, P36578, P62244, P62263, Q71UM5, P62249, P62917, Q96L21, P63220, P62906, P39023, P83731, P46777, P23396, P61313, P46778, P62829, P35268, P15880, P08708, P61247, P08865, P18124, P84098, P62701, P62847,…	210.25	11	18	240.069	40S_ribosomal_subunit,_cytoplasmic::Nop56p-associated_pre-rRNA_complex::TRBP_containing_complex_(DICER,_RPL7A,_EIF6,_MOV10_and_subunits_of_the_60S_ribosomal_particle)::DICER1-NCOA6-AGO2_complex::RNA-induced_silencing_complex,_RISC::TRBP_containing_complex_(DICER,_TRBP,_AGO2,_RPL7A,_EIF6,_MOV10)::FIB-associated_protein_complex	0.3975	129	Ribosome, cytoplasmic	0.5878	81	0.845331	structural constituent of ribosome: 1.011e-104	RNA binding: 1.097e-30	rRNA binding: 6.073e-10	mRNA binding: 2.932e-06	ATP binding: 0.003855	fibroblast growth factor binding: 0.005978	laminin receptor activity: 0.008521	5S rRNA binding: 0.008521	double-stranded RNA binding: 0.008528	mRNA 5'-UTR binding: 0.01551	metal ion binding: 0.02027	translation regulator activity: 0.02377	translation initiation factor binding: 0.04381	protein kinase A binding: 0.05159	translation activator activity: 0.05287	DNA N-glycosylase activity: 0.05543	DNA-(apurinic or apyrimidinic site) lyase activity: 0.063	cysteine-type endopeptidase activator activity involved in apoptotic process: 0.07167	laminin binding: 0.07412	DNA binding: 0.07441	protein binding: 0.07615	iron-sulfur cluster binding: 0.09201
523	57	P62851, Q08211, P30050, P62854, P50914, P05388, P62979, Q8IXI1, P18621, Q12906, P62910, P62424, P61513, P62913, P62280, Q02543, P62847, P62753, P62750, P52272, P25398, P62899, P46782, P62266, P62241, P36578, P62244, P62263, P62249, P62917, P62277, P63220, P62906, P39023, P83731, P46777, P23396, P61313, P39019, P46778, P62829, P35268, P15880, P08708, P61247, P08865, P18124, P84098, P62701, P27635,…	1	1	1	249.5	40S_ribosomal_subunit,_cytoplasmic::Nop56p-associated_pre-rRNA_complex::TRBP_containing_complex_(DICER,_RPL7A,_EIF6,_MOV10_and_subunits_of_the_60S_ribosomal_particle)::DICER1-NCOA6-AGO2_complex::RNA-induced_silencing_complex,_RISC::TRBP_containing_complex_(DICER,_TRBP,_AGO2,_RPL7A,_EIF6,_MOV10)::FIB-associated_protein_complex	0.3966	129	Ribosome, cytoplasmic	0.5634	81	0.84522	structural constituent of ribosome: 9.324e-98	RNA binding: 1.955e-31	rRNA binding: 4.906e-10	mRNA binding: 2.393e-06	ATP binding: 0.00483	fibroblast growth factor binding: 0.005597	laminin receptor activity: 0.008234	5S rRNA binding: 0.008234	metal ion binding: 0.008324	mRNA 5'-UTR binding: 0.01499	translation regulator activity: 0.02298	RNA helicase activity: 0.03729	translation initiation factor binding: 0.04239	protein kinase A binding: 0.04993	DNA N-glycosylase activity: 0.05365	DNA-(apurinic or apyrimidinic site) lyase activity: 0.061	laminin binding: 0.0718	DNA binding: 0.08414	iron-sulfur cluster binding: 0.08919	protein binding: 0.09366	NF-kappaB binding: 0.09706
379	57	P62851, P18621, P62854, P62857, P05388, P62979, P39019, P46782, P62910, P62424, P30050, P62913, P62280, Q02543, P50914, P62753, P62750, P25398, P62899, P62277, P26373, P62266, P62241, P36578, P62244, Q71UM5, P62249, P62917, Q96L21, P63220, P62906, P39023, P83731, P46777, P23396, P61313, P46778, P62829, P35268, P15880, P08708, P61247, Q12906, P08865, Q8NHW5, P18124, P84098, P62701, P62847, P27635,…	9	4	2	234.667	40S_ribosomal_subunit,_cytoplasmic::Nop56p-associated_pre-rRNA_complex::TRBP_containing_complex_(DICER,_RPL7A,_EIF6,_MOV10_and_subunits_of_the_60S_ribosomal_particle)::DICER1-NCOA6-AGO2_complex::RNA-induced_silencing_complex,_RISC::TRBP_containing_complex_(DICER,_TRBP,_AGO2,_RPL7A,_EIF6,_MOV10)::FIB-associated_protein_complex	0.382	129	Ribosome, cytoplasmic	0.5857	81	0.83592	structural constituent of ribosome: 4.605e-104	RNA binding: 1.597e-28	rRNA binding: 4.906e-10	mRNA binding: 2.393e-06	fibroblast growth factor binding: 0.005597	laminin receptor activity: 0.008234	5S rRNA binding: 0.008234	metal ion binding: 0.02459	translation initiation factor binding: 0.04239	DNA binding: 0.04407	protein kinase A binding: 0.04993	translation activator activity: 0.05117	DNA N-glycosylase activity: 0.05365	DNA-(apurinic or apyrimidinic site) lyase activity: 0.061	cysteine-type endopeptidase activator activity involved in apoptotic process: 0.06942	laminin binding: 0.0718	iron-sulfur cluster binding: 0.08919	protein binding: 0.09366	NF-kappaB binding: 0.09706
103	55	P62851, P30050, P05386, P62854, P50914, Q07020, P05388, P39019, O00567, P62424, P61513, P62913, P62280, Q02543, P62847, Q14137, P62753, P62750, P52272, P62899, P46782, P46781, P62081, P62266, P62241, Q9Y2X3, P36578, P62244, P62263, P62249, P62917, Q96L21, P62906, P39023, P46777, P23396, P55769, P46778, P61313, P84098, P35268, P15880, P08708, P61247, P08865, P18124, P62829, P62701, P27635, P62888,…	1089	31	35	242.894	40S_ribosomal_subunit,_cytoplasmic::Nop56p-associated_pre-rRNA_complex::TRBP_containing_complex_(DICER,_RPL7A,_EIF6,_MOV10_and_subunits_of_the_60S_ribosomal_particle)::DICER1-NCOA6-AGO2_complex::RNA-induced_silencing_complex,_RISC::TRBP_containing_complex_(DICER,_TRBP,_AGO2,_RPL7A,_EIF6,_MOV10)::FIB-associated_protein_complex	0.3811	129	Ribosome, cytoplasmic	0.5172	81	0.831933	structural constituent of ribosome: 6.11e-91	RNA binding: 3.128e-32	rRNA binding: 3.931e-10	mRNA binding: 1.937e-06	snoRNA binding: 8.798e-06	translation regulator activity: 0.0002328	metal ion binding: 0.0024	fibroblast growth factor binding: 0.005228	laminin receptor activity: 0.007947	5S rRNA binding: 0.007947	mRNA 5'-UTR binding: 0.01447	DNA binding: 0.0206	protein binding: 0.02083	translation initiation factor binding: 0.04096	protein kinase A binding: 0.04826	DNA N-glycosylase activity: 0.05187	DNA-(apurinic or apyrimidinic site) lyase activity: 0.05899	laminin binding: 0.06947	iron-sulfur cluster binding: 0.08636	NF-kappaB binding: 0.094
152	58	P62851, P18621, P62854, P62857, P50914, P05388, P62979, P39019, P62910, P62424, P30050, P62913, P52272, Q02543, P62847, P62753, P62750, P62899, P46782, P26373, P62266, P62241, P36578, P62244, P62263, Q71UM5, P62249, P62917, P62277, P32969, P62906, P39023, P83731, P46777, P38159, P23396, P61313, P46778, P62829, P35268, P15880, P08708, P61247, P08865, P18124, Q9Y5S9, P84098, P62701, P27635, P62888,…	156.25	13	12	242.84	40S_ribosomal_subunit,_cytoplasmic::Nop56p-associated_pre-rRNA_complex::TRBP_containing_complex_(DICER,_RPL7A,_EIF6,_MOV10_and_subunits_of_the_60S_ribosomal_particle)::DICER1-NCOA6-AGO2_complex::RNA-induced_silencing_complex,_RISC::TRBP_containing_complex_(DICER,_TRBP,_AGO2,_RPL7A,_EIF6,_MOV10)::FIB-associated_protein_complex	0.3754	129	Ribosome, cytoplasmic	0.5756	81	0.830849	structural constituent of ribosome: 8.806e-103	RNA binding: 4.695e-34	mRNA binding: 5.607e-09	rRNA binding: 4.104e-08	fibroblast growth factor binding: 0.005786	laminin receptor activity: 0.008377	5S rRNA binding: 0.008377	mRNA 5'-UTR binding: 0.01525	DNA binding: 0.01542	nucleotide binding: 0.01782	metal ion binding: 0.02234	translation regulator activity: 0.02338	translation initiation factor binding: 0.0431	nucleic acid binding: 0.04892	protein kinase A binding: 0.05076	translation activator activity: 0.05202	DNA N-glycosylase activity: 0.05454	DNA-(apurinic or apyrimidinic site) lyase activity: 0.062	protein binding: 0.06944	cysteine-type endopeptidase activator activity involved in apoptotic process: 0.07055	core promoter binding: 0.07176	laminin binding: 0.07296	iron-sulfur cluster binding: 0.0906	NF-kappaB binding: 0.09858
89	54	P62851, P30050, P05386, P62854, P50914, P05388, P08865, P39019, P46782, P62424, P61513, P62913, P62280, Q02543, P62847, P62753, P62750, P52272, P62899, Q07020, P62081, P62266, P62241, P36578, P62244, P62263, Q71UM5, P62249, P62917, P62906, P39023, P83731, P46777, P23396, P55769, P46778, P61313, P84098, P35268, P15880, P61247, Q12906, Q00839, Q14498, P18124, P62829, P62701, P62888, P62277, P60866,…	342.25	20	17	241.973	40S_ribosomal_subunit,_cytoplasmic::Nop56p-associated_pre-rRNA_complex::TRBP_containing_complex_(DICER,_RPL7A,_EIF6,_MOV10_and_subunits_of_the_60S_ribosomal_particle)::DICER1-NCOA6-AGO2_complex::RNA-induced_silencing_complex,_RISC::TRBP_containing_complex_(DICER,_TRBP,_AGO2,_RPL7A,_EIF6,_MOV10)::FIB-associated_protein_complex	0.3734	129	Ribosome, cytoplasmic	0.505	81	0.823529	structural constituent of ribosome: 5.03e-89	RNA binding: 7.499e-41	rRNA binding: 3.507e-10	mRNA binding: 1.737e-06	fibroblast growth factor binding: 0.005048	ATP binding: 0.006756	laminin receptor activity: 0.007803	5S rRNA binding: 0.007803	metal ion binding: 0.01168	mRNA 5'-UTR binding: 0.01421	protein binding: 0.01643	translation regulator activity: 0.0218	snoRNA binding: 0.03783	translation initiation factor binding: 0.04025	protein kinase A binding: 0.04743	nucleotide binding: 0.04765	translation activator activity: 0.04861	DNA N-glycosylase activity: 0.05098	DNA-(apurinic or apyrimidinic site) lyase activity: 0.05799	nucleic acid binding: 0.06247	cysteine-type endopeptidase activator activity involved in apoptotic process: 0.06602	laminin binding: 0.06829	iron-sulfur cluster binding: 0.08493	NF-kappaB binding: 0.09247
1727	54	P62851, P62854, P62857, P50914, P05388, P39019, P46782, P62424, P30050, P62913, P62280, P61513, P46777, P55769, P62753, P62750, P52272, P62899, Q07020, P46781, Q02543, P62266, P62241, P36578, P62244, P62263, P62249, P62917, Q96L21, P32969, P62906, P61353, P62847, P23396, P61313, P46778, P84098, P35268, P15880, P08708, P61247, P08865, P18124, P62829, P62701, P27635, P62888, P62277, P63220, P26373,…	576	23	25	239.958	40S_ribosomal_subunit,_cytoplasmic::Nop56p-associated_pre-rRNA_complex::TRBP_containing_complex_(DICER,_RPL7A,_EIF6,_MOV10_and_subunits_of_the_60S_ribosomal_particle)::DICER1-NCOA6-AGO2_complex::RNA-induced_silencing_complex,_RISC::TRBP_containing_complex_(DICER,_TRBP,_AGO2,_RPL7A,_EIF6,_MOV10)::FIB-associated_protein_complex	0.3734	129	Ribosome, cytoplasmic	0.5716	81	0.837951	structural constituent of ribosome: 3.148e-98	RNA binding: 4.075e-31	rRNA binding: 3.055e-14	mRNA binding: 1.737e-06	translation regulator activity: 0.0002244	fibroblast growth factor binding: 0.005048	laminin receptor activity: 0.007803	5S rRNA binding: 0.007803	metal ion binding: 0.01168	mRNA 5'-UTR binding: 0.01421	DNA binding: 0.02266	snoRNA binding: 0.03783	translation initiation factor binding: 0.04025	protein kinase A binding: 0.04743	DNA N-glycosylase activity: 0.05098	DNA-(apurinic or apyrimidinic site) lyase activity: 0.05799	laminin binding: 0.06829	protein binding: 0.07521	iron-sulfur cluster binding: 0.08493	NF-kappaB binding: 0.09247
168	51	P62851, Q08211, P50914, Q07020, P05388, P46782, P62424, P30050, P62913, P52272, Q02543, P62854, P62753, P62750, P62899, Q12906, Q12905, P26373, P62266, P55769, P36578, P62244, P62263, Q71UM5, P62249, P62917, P62277, P62906, P39023, P83731, P46777, P23396, P61313, P46778, P62829, P35268, P15880, P61247, P08865, P18124, P84098, P62701, P27635, P19338, P62888, Q6NZI2, P60866, P32969, Q02878, P62081,…	506.25	23	22	247.533	40S_ribosomal_subunit,_cytoplasmic::Nop56p-associated_pre-rRNA_complex::TRBP_containing_complex_(DICER,_RPL7A,_EIF6,_MOV10_and_subunits_of_the_60S_ribosomal_particle)::DICER1-NCOA6-AGO2_complex::RNA-induced_silencing_complex,_RISC::TRBP_containing_complex_(DICER,_TRBP,_AGO2,_RPL7A,_EIF6,_MOV10)::FIB-associated_protein_complex	0.3649	129	Ribosome, cytoplasmic	0.4476	81	0.825271	structural constituent of ribosome: 1.061e-77	RNA binding: 8.318e-41	rRNA binding: 2.126e-08	mRNA binding: 1.236e-06	rRNA primary transcript binding: 0.001236	protein binding: 0.003488	double-stranded RNA binding: 0.006476	laminin receptor activity: 0.007372	5S rRNA binding: 0.007372	mRNA 5'-UTR binding: 0.01343	metal ion binding: 0.0163	translation regulator activity: 0.02061	ATP binding: 0.03267	RNA helicase activity: 0.0335	snoRNA binding: 0.0358	protein kinase A binding: 0.04491	translation activator activity: 0.04604	DNA N-glycosylase activity: 0.04828	telomeric DNA binding: 0.05274	DNA-(apurinic or apyrimidinic site) lyase activity: 0.05495	cysteine-type endopeptidase activator activity involved in apoptotic process: 0.0626	laminin binding: 0.06476	nucleic acid binding: 0.07478	iron-sulfur cluster binding: 0.08062	NF-kappaB binding: 0.08782	fibroblast growth factor binding: 0.09188	ATP-dependent RNA helicase activity: 0.09288	ribosome binding: 0.09689
542	52	P62851, P62854, P62857, P50914, P05388, P39019, P46782, P62424, P30050, P62913, P62280, P61513, P62847, P62753, P62750, P52272, P62899, Q07020, P46781, Q02543, P62266, P62241, P36578, P62244, P62263, P62249, P62917, Q96L21, P62906, P55769, P46777, P23396, P61313, P46778, P84098, P35268, P15880, P08708, P61247, P08865, P18124, P62829, P62701, P27635, P62888, P62277, P63220, P26373, P61927, Q02878,…	16	5	3	231.125	40S_ribosomal_subunit,_cytoplasmic::Nop56p-associated_pre-rRNA_complex::TRBP_containing_complex_(DICER,_RPL7A,_EIF6,_MOV10_and_subunits_of_the_60S_ribosomal_particle)::DICER1-NCOA6-AGO2_complex::RNA-induced_silencing_complex,_RISC::TRBP_containing_complex_(DICER,_TRBP,_AGO2,_RPL7A,_EIF6,_MOV10)::FIB-associated_protein_complex	0.3579	129	Ribosome, cytoplasmic	0.547	81	0.849242	structural constituent of ribosome: 2.408e-94	RNA binding: 2.082e-30	rRNA binding: 2.701e-12	mRNA binding: 1.388e-06	translation regulator activity: 0.0002081	fibroblast growth factor binding: 0.004696	laminin receptor activity: 0.007516	5S rRNA binding: 0.007516	mRNA 5'-UTR binding: 0.01369	metal ion binding: 0.0146	DNA binding: 0.02735	snoRNA binding: 0.03648	translation initiation factor binding: 0.03882	protein kinase A binding: 0.04575	DNA N-glycosylase activity: 0.04918	DNA-(apurinic or apyrimidinic site) lyase activity: 0.05596	protein binding: 0.05984	laminin binding: 0.06594	iron-sulfur cluster binding: 0.08206	NF-kappaB binding: 0.08938	protein kinase binding: 0.09474	ribosome binding: 0.09858
114	50	P62851, Q08211, P30050, P62854, P55769, Q07020, P05388, P39019, P46782, P46781, P62424, P61513, P62913, P62280, Q02543, P50914, P62753, P62750, P52272, P62899, Q12906, Q12905, P62081, P62266, P62241, P36578, P62244, P62263, P49792, P62249, P62906, P46777, P23396, P61313, P62829, P35268, P15880, P61247, P08865, P18124, P84098, P62701, P62847, P27635, P62888, P62277, P60866, P32969, Q02878, Q8NHW5,	156.25	15	10	248.68	40S_ribosomal_subunit,_cytoplasmic::Nop56p-associated_pre-rRNA_complex::TRBP_containing_complex_(DICER,_RPL7A,_EIF6,_MOV10_and_subunits_of_the_60S_ribosomal_particle)::DICER1-NCOA6-AGO2_complex::RNA-induced_silencing_complex,_RISC::TRBP_containing_complex_(DICER,_TRBP,_AGO2,_RPL7A,_EIF6,_MOV10)::FIB-associated_protein_complex	0.3572	129	Ribosome, cytoplasmic	0.4565	81	0.847	structural constituent of ribosome: 1.473e-78	RNA binding: 7.627e-33	rRNA binding: 2.171e-10	mRNA binding: 1.098e-06	translation regulator activity: 0.0001924	fibroblast growth factor binding: 0.004355	metal ion binding: 0.004605	protein binding: 0.005005	double-stranded RNA binding: 0.006237	laminin receptor activity: 0.007229	5S rRNA binding: 0.007229	mRNA 5'-UTR binding: 0.01317	RNA helicase activity: 0.03286	snoRNA binding: 0.03513	ATP binding: 0.03574	translation initiation factor binding: 0.03738	protein kinase A binding: 0.04407	DNA N-glycosylase activity: 0.04738	zinc ion binding: 0.05059	DNA-(apurinic or apyrimidinic site) lyase activity: 0.05393	laminin binding: 0.06357	iron-sulfur cluster binding: 0.07918	NF-kappaB binding: 0.08626	protein kinase binding: 0.08824	ATP-dependent RNA helicase activity: 0.09124	ribosome binding: 0.09519
271	50	P62851, P18621, P62854, P62857, Q07020, P05388, P39019, P62910, P62424, P46776, P30050, P62913, Q02543, P50914, P62753, P62750, P62899, Q12906, P26373, P62266, P62241, P36578, P62244, P62263, Q71UM5, P62249, P62917, P63220, P62906, P39023, P83731, P46777, P23396, P61313, P46778, P62829, P35268, P15880, O00264, P61247, P08865, P18124, P84098, P62701, P62277, P60866, P32969, Q02878, Q8NHW5, P61513,	4	3	1	249.25	40S_ribosomal_subunit,_cytoplasmic::Nop56p-associated_pre-rRNA_complex::TRBP_containing_complex_(DICER,_RPL7A,_EIF6,_MOV10_and_subunits_of_the_60S_ribosomal_particle)::DICER1-NCOA6-AGO2_complex::RNA-induced_silencing_complex,_RISC::TRBP_containing_complex_(DICER,_TRBP,_AGO2,_RPL7A,_EIF6,_MOV10)::FIB-associated_protein_complex	0.3425	129	Ribosome, cytoplasmic	0.5225	81	0.811621	structural constituent of ribosome: 1.82e-90	RNA binding: 2.968e-31	rRNA binding: 1.921e-08	mRNA binding: 2.179e-05	fibroblast growth factor binding: 0.004355	laminin receptor activity: 0.007229	5S rRNA binding: 0.007229	mRNA 5'-UTR binding: 0.01317	metal ion binding: 0.01818	translation regulator activity: 0.02022	protein kinase A binding: 0.04407	protein binding: 0.04417	translation activator activity: 0.04518	DNA N-glycosylase activity: 0.04738	DNA-(apurinic or apyrimidinic site) lyase activity: 0.05393	cysteine-type endopeptidase activator activity involved in apoptotic process: 0.06145	laminin binding: 0.06357	DNA binding: 0.07451	iron-sulfur cluster binding: 0.07918	steroid binding: 0.08121	NF-kappaB binding: 0.08626	protein kinase binding: 0.08824	ribosome binding: 0.09519
242	46	P62851, P50914, Q07020, P05388, P39019, P46782, P62424, P30050, P62913, Q15293, P62854, P62753, P62750, P62899, Q12906, Q12905, Q02543, P62266, P36578, P62244, P62263, Q71UM5, P62249, P62917, P62906, P39023, P83731, P46777, P23396, P61313, P46778, P62829, P35268, P15880, P61247, P18124, P84098, P62701, P62847, P27635, P19338, P62277, P60866, P32969, P26373, Q02878,	20.25	5	4	240.444	40S_ribosomal_subunit,_cytoplasmic::Nop56p-associated_pre-rRNA_complex::TRBP_containing_complex_(DICER,_RPL7A,_EIF6,_MOV10_and_subunits_of_the_60S_ribosomal_particle)::DICER1-NCOA6-AGO2_complex::RNA-induced_silencing_complex,_RISC::TRBP_containing_complex_(DICER,_TRBP,_AGO2,_RPL7A,_EIF6,_MOV10)::FIB-associated_protein_complex	0.3263	129	Ribosome, cytoplasmic	0.4512	81	0.832952	structural constituent of ribosome: 1.233e-76	RNA binding: 7.364e-35	rRNA binding: 1.25e-08	mRNA binding: 6.646e-07	fibroblast growth factor binding: 0.003708	double-stranded RNA binding: 0.005319	5S rRNA binding: 0.006654	metal ion binding: 0.007701	protein binding: 0.01006	mRNA 5'-UTR binding: 0.01213	ATP binding: 0.01627	translation regulator activity: 0.01863	translation initiation factor binding: 0.03449	protein kinase A binding: 0.04069	translation activator activity: 0.04172	DNA N-glycosylase activity: 0.04376	telomeric DNA binding: 0.04782	DNA-(apurinic or apyrimidinic site) lyase activity: 0.04984	cysteine-type endopeptidase activator activity involved in apoptotic process: 0.05682	iron-sulfur cluster binding: 0.07334	protein kinase binding: 0.07539	NF-kappaB binding: 0.07995	nucleotide binding: 0.09929
161	44	P62851, P30050, P05386, P62854, P50914, P05388, P46782, P27635, P62424, P61513, P62913, P52272, Q02543, P46777, P62753, P62750, Q01081, P62899, Q07020, P62081, P62266, P61313, P36578, P62244, P62263, P62241, P62249, P62906, P62847, P23396, P55769, P62829, P35268, P15880, Q00839, P08865, P26368, P18124, P84098, P62701, Q9Y3A4, P62888, P62277, Q02878,	90.25	8	11	244.947	40S_ribosomal_subunit,_cytoplasmic::Nop56p-associated_pre-rRNA_complex::TRBP_containing_complex_(DICER,_RPL7A,_EIF6,_MOV10_and_subunits_of_the_60S_ribosomal_particle)::DICER1-NCOA6-AGO2_complex::RNA-induced_silencing_complex,_RISC::TRBP_containing_complex_(DICER,_TRBP,_AGO2,_RPL7A,_EIF6,_MOV10)::FIB-associated_protein_complex	0.3258	129	Ribosome, cytoplasmic	0.4052	81	0.835958	structural constituent of ribosome: 3.231e-67	RNA binding: 3.123e-34	mRNA binding: 5.076e-07	rRNA binding: 5.087e-05	nucleotide binding: 0.001181	laminin receptor activity: 0.006366	5S rRNA binding: 0.006366	protein binding: 0.01021	mRNA 5'-UTR binding: 0.01161	translation regulator activity: 0.01783	ATP binding: 0.02018	RS domain binding: 0.02296	snoRNA binding: 0.03104	translation initiation factor binding: 0.03304	metal ion binding: 0.03441	protein kinase A binding: 0.03899	C2H2 zinc finger domain binding: 0.04096	DNA N-glycosylase activity: 0.04194	enzyme binding: 0.04263	DNA-(apurinic or apyrimidinic site) lyase activity: 0.04778	laminin binding: 0.05639	iron-sulfur cluster binding: 0.07039	NF-kappaB binding: 0.07677	fibroblast growth factor binding: 0.08037	ribosome binding: 0.08482
123	45	P62851, P50914, Q07020, P05388, P62424, P30050, P62913, P52272, Q02543, P62854, Q9NS69, P62753, P62750, P62899, Q12906, Q12905, P26373, P62266, P36578, P62244, P62263, Q71UM5, P62249, P62917, P62906, P39023, P83731, P46777, P23396, P61313, P46778, O43390, P62829, P35268, P15880, P61247, P18124, P84098, P62701, P27635, P19338, P62277, P60866, P32969, Q02878,	6.25	2	3	254.4	40S_ribosomal_subunit,_cytoplasmic::Nop56p-associated_pre-rRNA_complex::TRBP_containing_complex_(DICER,_RPL7A,_EIF6,_MOV10_and_subunits_of_the_60S_ribosomal_particle)::DICER1-NCOA6-AGO2_complex::RNA-induced_silencing_complex,_RISC::TRBP_containing_complex_(DICER,_TRBP,_AGO2,_RPL7A,_EIF6,_MOV10)::FIB-associated_protein_complex	0.3039	129	Ribosome, cytoplasmic	0.3962	81	0.8325	structural constituent of ribosome: 4.216e-69	RNA binding: 3.26e-37	rRNA binding: 1.116e-08	mRNA binding: 1.299e-05	protein binding: 0.003409	double-stranded RNA binding: 0.0051	5S rRNA binding: 0.00651	metal ion binding: 0.008748	mRNA 5'-UTR binding: 0.01187	protein transmembrane transporter activity: 0.01294	ATP binding: 0.01812	translation regulator activity: 0.01823	nucleotide binding: 0.02902	protein kinase A binding: 0.03984	translation activator activity: 0.04085	DNA N-glycosylase activity: 0.04285	telomeric DNA binding: 0.04683	DNA-(apurinic or apyrimidinic site) lyase activity: 0.04881	cysteine-type endopeptidase activator activity involved in apoptotic process: 0.05566	iron-sulfur cluster binding: 0.07187	NF-kappaB binding: 0.07836	fibroblast growth factor binding: 0.08203
411	43	P62851, P50914, Q07020, P05388, P62424, P30050, P62913, Q02543, P62854, P62753, P62750, P62899, Q12906, Q12905, P26373, P62266, P36578, P62244, P62263, Q71UM5, P62249, P62917, P62906, P39023, P83731, P46777, P23396, P61313, P46778, P62829, P35268, P15880, P61247, P18124, P84098, P62701, P27635, P19338, P11279, P62277, P60866, P32969, Q02878,	0	0	0	0	40S_ribosomal_subunit,_cytoplasmic::Nop56p-associated_pre-rRNA_complex::TRBP_containing_complex_(DICER,_RPL7A,_EIF6,_MOV10_and_subunits_of_the_60S_ribosomal_particle)::DICER1-NCOA6-AGO2_complex::RNA-induced_silencing_complex,_RISC::TRBP_containing_complex_(DICER,_TRBP,_AGO2,_RPL7A,_EIF6,_MOV10)::FIB-associated_protein_complex	0.303	129	Ribosome, cytoplasmic	0.4146	81	0.829205	structural constituent of ribosome: 6.535e-71	RNA binding: 8.208e-35	rRNA binding: 8.818e-09	mRNA binding: 1.037e-05	double-stranded RNA binding: 0.004674	5S rRNA binding: 0.006222	protein binding: 0.007251	metal ion binding: 0.01127	mRNA 5'-UTR binding: 0.01135	translation regulator activity: 0.01743	ATP binding: 0.02245	protein kinase A binding: 0.03814	translation activator activity: 0.03911	DNA N-glycosylase activity: 0.04103	telomeric DNA binding: 0.04485	DNA-(apurinic or apyrimidinic site) lyase activity: 0.04674	cysteine-type endopeptidase activator activity involved in apoptotic process: 0.05332	iron-sulfur cluster binding: 0.06891	NF-kappaB binding: 0.07516	fibroblast growth factor binding: 0.07869
495	43	P62851, P50914, Q07020, P05388, P62424, P30050, P62913, Q02543, P62854, P62753, P62750, P62899, Q12906, Q12905, P26373, P62266, P36578, P62244, P62263, Q71UM5, P62249, P62917, P62906, P39023, P83731, P46777, P23396, P61313, P46778, P62829, P35268, P15880, P61247, P11498, P18124, P84098, P62701, P27635, P19338, P62277, P60866, P32969, Q02878,	0	0	0	0	40S_ribosomal_subunit,_cytoplasmic::Nop56p-associated_pre-rRNA_complex::TRBP_containing_complex_(DICER,_RPL7A,_EIF6,_MOV10_and_subunits_of_the_60S_ribosomal_particle)::DICER1-NCOA6-AGO2_complex::RNA-induced_silencing_complex,_RISC::TRBP_containing_complex_(DICER,_TRBP,_AGO2,_RPL7A,_EIF6,_MOV10)::FIB-associated_protein_complex	0.303	129	Ribosome, cytoplasmic	0.4146	81	0.829205	structural constituent of ribosome: 6.535e-71	RNA binding: 8.208e-35	rRNA binding: 8.818e-09	mRNA binding: 1.037e-05	pyruvate carboxylase activity: 0.004156	double-stranded RNA binding: 0.004674	5S rRNA binding: 0.006222	mRNA 5'-UTR binding: 0.01135	protein binding: 0.01425	biotin binding: 0.01743	translation regulator activity: 0.01743	biotin carboxylase activity: 0.03329	metal ion binding: 0.03813	protein kinase A binding: 0.03814	translation activator activity: 0.03911	DNA N-glycosylase activity: 0.04103	telomeric DNA binding: 0.04485	DNA-(apurinic or apyrimidinic site) lyase activity: 0.04674	cysteine-type endopeptidase activator activity involved in apoptotic process: 0.05332	ATP binding: 0.06538	iron-sulfur cluster binding: 0.06891	NF-kappaB binding: 0.07516	fibroblast growth factor binding: 0.07869
363	44	P62851, P50914, Q07020, P62424, P30050, P62913, P52272, Q02543, P62854, P62753, P62750, P62899, Q12906, Q12905, P26373, P62266, P36578, P62244, P62263, Q71UM5, P62249, P62917, P62906, P39023, P83731, P46777, P23396, P61313, P46778, P62829, P35268, P15880, P61247, P18124, O60506, P84098, P62701, P19338, P27635, Q04941, P62277, P60866, P32969, Q02878,	0	0	0	0	40S_ribosomal_subunit,_cytoplasmic::Nop56p-associated_pre-rRNA_complex::TRBP_containing_complex_(DICER,_RPL7A,_EIF6,_MOV10_and_subunits_of_the_60S_ribosomal_particle)::DICER1-NCOA6-AGO2_complex::RNA-induced_silencing_complex,_RISC::TRBP_containing_complex_(DICER,_TRBP,_AGO2,_RPL7A,_EIF6,_MOV10)::FIB-associated_protein_complex	0.2962	129	Ribosome, cytoplasmic	0.3841	81	0.848168	structural constituent of ribosome: 3.231e-67	RNA binding: 5.191e-36	rRNA binding: 9.934e-09	mRNA binding: 1.163e-05	double-stranded RNA binding: 0.004885	protein binding: 0.005006	chemokine binding: 0.00531	5S rRNA binding: 0.006366	metal ion binding: 0.009932	mRNA 5'-UTR binding: 0.01161	translation regulator activity: 0.01783	ATP binding: 0.02018	nucleotide binding: 0.0272	ion transmembrane transporter activity: 0.02903	protein kinase A binding: 0.03899	translation activator activity: 0.03998	DNA N-glycosylase activity: 0.04194	telomeric DNA binding: 0.04584	DNA-(apurinic or apyrimidinic site) lyase activity: 0.04778	poly(A) RNA binding: 0.05163	cysteine-type endopeptidase activator activity involved in apoptotic process: 0.05449	iron-sulfur cluster binding: 0.07039	NF-kappaB binding: 0.07677	fibroblast growth factor binding: 0.08037
488	44	P62851, P50914, Q07020, O95202, P62424, P30050, P62913, P52272, Q02543, P62854, P62753, P62750, P62899, Q12906, Q12905, P26373, P62266, P36578, P62244, P62263, Q71UM5, P62249, P62917, P62906, P39023, P83731, P46777, P23396, P61313, P46778, P62829, P35268, P15880, P61247, P18124, O60506, P84098, P62701, P27635, P19338, P62277, P60866, P32969, Q02878,	0	0	0	0	40S_ribosomal_subunit,_cytoplasmic::Nop56p-associated_pre-rRNA_complex::TRBP_containing_complex_(DICER,_RPL7A,_EIF6,_MOV10_and_subunits_of_the_60S_ribosomal_particle)::DICER1-NCOA6-AGO2_complex::RNA-induced_silencing_complex,_RISC::TRBP_containing_complex_(DICER,_TRBP,_AGO2,_RPL7A,_EIF6,_MOV10)::FIB-associated_protein_complex	0.2962	129	Ribosome, cytoplasmic	0.3841	81	0.848168	structural constituent of ribosome: 3.231e-67	RNA binding: 5.191e-36	rRNA binding: 9.934e-09	mRNA binding: 1.163e-05	double-stranded RNA binding: 0.004885	protein binding: 0.005006	5S rRNA binding: 0.006366	metal ion binding: 0.009932	mRNA 5'-UTR binding: 0.01161	translation regulator activity: 0.01783	ATP binding: 0.02018	nucleotide binding: 0.0272	protein kinase A binding: 0.03899	translation activator activity: 0.03998	DNA N-glycosylase activity: 0.04194	telomeric DNA binding: 0.04584	DNA-(apurinic or apyrimidinic site) lyase activity: 0.04778	poly(A) RNA binding: 0.05163	cysteine-type endopeptidase activator activity involved in apoptotic process: 0.05449	iron-sulfur cluster binding: 0.07039	NF-kappaB binding: 0.07677	fibroblast growth factor binding: 0.08037
473	42	P62851, P62854, Q07020, P62424, P30050, P62913, Q02543, P50914, P62753, P62750, P62899, Q12906, P26373, P62266, P36578, P62244, P62263, Q71UM5, P62249, P62917, P62906, P39023, P83731, P46777, P23396, P61313, P46778, P62829, P35268, P15880, P61247, P18124, Q9HCE1, P84098, P62701, P27635, P19338, P62277, P60866, P32969, Q9H4L4, Q02878,	0	0	0	0	40S_ribosomal_subunit,_cytoplasmic::Nop56p-associated_pre-rRNA_complex::TRBP_containing_complex_(DICER,_RPL7A,_EIF6,_MOV10_and_subunits_of_the_60S_ribosomal_particle)::DICER1-NCOA6-AGO2_complex::RNA-induced_silencing_complex,_RISC::TRBP_containing_complex_(DICER,_TRBP,_AGO2,_RPL7A,_EIF6,_MOV10)::FIB-associated_protein_complex	0.2953	129	Ribosome, cytoplasmic	0.4024	81	0.84626	structural constituent of ribosome: 5.242e-69	RNA binding: 2.007e-35	rRNA binding: 7.805e-09	mRNA binding: 9.229e-06	5S rRNA binding: 0.006078	protein binding: 0.01035	mRNA 5'-UTR binding: 0.01109	metal ion binding: 0.01278	translation regulator activity: 0.01703	ATP binding: 0.02497	protein kinase A binding: 0.03729	translation activator activity: 0.03823	DNA N-glycosylase activity: 0.04011	telomeric DNA binding: 0.04385	DNA-(apurinic or apyrimidinic site) lyase activity: 0.04571	cysteine-type endopeptidase activator activity involved in apoptotic process: 0.05215	iron-sulfur cluster binding: 0.06742	NF-kappaB binding: 0.07355	fibroblast growth factor binding: 0.07701	double-stranded RNA binding: 0.09142
[truncated: 1,452 more rows]
[truncated: 4 more columns]

## Sheet: SiComPre LG
Complex ID	Size	List of proteins	Quantitative prediction	Abundance Sim 1	Abundance Sim 2	Average size of simulated complexes	Best matching reference complex	Matching thr	Length of reference complex	Best matching CORUM complex	Matching thr	Length of CORUM complex	Fraction of fictitious domains	Functional Enrichment
[truncated: 1,656 more rows]
[truncated: 4 more columns]

## Sheet: SiComPre SM
Complex ID	Size	List of proteins	Quantitative prediction	Abundance Sim 1	Abundance Sim 2	Average size of simulated complexes	Best matching reference complex	Matching thr	Length of reference complex	Best matching CORUM complex	Matching thr	Length of CORUM complex	Fraction of fictitious domains	Functional Enrichment
[truncated: 1,158 more rows]
[truncated: 4 more columns]
