# Supplementary material for: Qualitative and Quantitative Protein Complex Prediction Through Proteome-Wide Simulations
Source: PLoS Comput Biol. 2015 Oct 22;11(10):e1004424. doi: 10.1371/journal.pcbi.1004424 (PMC4619657; doi:10.1371/journal.pcbi.1004424)
Supplement: S3 Table — (XLSX) [file pcbi.1004424.s003.xlsx]

## Sheet: Normal vs. Bortezomib
Idref	Size	List of proteins in normal condition	Qualitative Prediction	Std. Dev.	List of protein with bortezomib	Matching between new and old complex	Qualitative prediction with bortezomib	Std. Dev. with bortezomib	Abundance variation	T	P-value	Best matching reference complex with normal complex	Matching thr.	Size of reference complex	Best matching reference complex with Bortezomib	Matching thr.	Size of reference complex	Functions
1806	2	O75886, O14964,	77.3333	0.4714					-77.3333	284.143	1.23856e-05	RIN1-STAM2-EGFR_complex,_EGF_stimulated::RIN1-STAM2-HRS_complex	0.5	4				protein domain specific binding: 0.0281
187	8	P30260, Q9UJX2, Q9UM13, Q9UJX5, Q9UJX4, Q9UJX6, Q9UJX3, Q13042,	93.6667	1.2472	P30260, Q9UJX2, Q9UM13, Q9UJX5, Q9UJX4, Q9UJX6, Q9UJX3, Q13042,	1	2.3333	0.4714	-91.3334	118.647	7.10294e-05	Anaphase-promoting_complex::Cell_division_cycle_complex_(CDC27,_CDC16,_ANAPC7)	0.8889	9	Anaphase-promoting_complex::Cell_division_cycle_complex_(CDC27,_CDC16,_ANAPC7)	0.8889	9	protein phosphatase binding: 2.634e-08	ubiquitin-protein ligase activity: 9.401e-08	ubiquitin protein ligase binding: 0.0947
779	2	P42765, P07737,	0.6667	0.9428	P42765, P07737,	1	325.667	4.7842	325	115.441	7.50288e-05	Profilin_1_complex	0.0833	6	Profilin_1_complex	0.0833	6	acetyl-CoA C-acyltransferase activity: 0.0009691	proline-rich region binding: 0.002953	transferase activity transferring acyl groups other than amino-acyl groups: 0.002953	Rho GTPase binding: 0.004161	actin binding: 0.05292
1870	2	P78371, Q13263,	1023.33	20.7579	P78371, Q13263,	1	42.3333	0.4714	-981	81.8341	0.000149291	CCT_micro-complex	0.0625	8	CCT_micro-complex	0.0625	8	Krueppel-associated box domain binding: 0.0002424	chromo shadow domain binding: 0.0009691	unfolded protein binding: 0.01578	ubiquitin protein ligase binding: 0.0256	transcription corepressor activity: 0.02697	transcription coactivator activity: 0.03209	ubiquitin-protein ligase activity: 0.035	protein kinase activity: 0.05461	sequence-specific DNA binding: 0.06516
90	5	P54727, P78318, P62306, P37802, P62937,	264.667	6.1283	P54727, P78318, P62306, P37802, P62937,	1	3	2.1602	-261.667	69.7488	0.000205491	Anti-SMN_protein_complex::Anti-Sm_protein_complex::SMN1-SIP1-SNRP_complex::SMN_complex::SMN_complex_(GEMIN2,5,_SMN)::SMN_complex_(GEMIN5,2,3,4,_SMN)::SMN_complex_(GEMIN5,4,3),_SMN-independent_intermediate::SMN_complex_(GEMIN6,7,_UNRIP),_SMN-independent_intermediate::SMN_containing_complex::PPP4C-PPP4R2-Gemin3-Gemin4_complex::SMN-PolII-RHA_complex	0.0069	29	Anti-SMN_protein_complex::Anti-Sm_protein_complex::SMN1-SIP1-SNRP_complex::SMN_complex::SMN_complex_(GEMIN2,5,_SMN)::SMN_complex_(GEMIN5,2,3,4,_SMN)::SMN_complex_(GEMIN5,4,3),_SMN-independent_intermediate::SMN_complex_(GEMIN6,7,_UNRIP),_SMN-independent_intermediate::SMN_containing_complex::PPP4C-PPP4R2-Gemin3-Gemin4_complex::SMN-PolII-RHA_complex	0.0069	29	virion binding: 0.002178	mitogen-activated protein kinase kinase binding: 0.004108	polyubiquitin binding: 0.00747	protein phosphatase type 2A regulator activity: 0.007949	peptide binding: 0.01224	protein binding: 0.01368	peptidyl-prolyl cis-trans isomerase activity: 0.01532	single-stranded DNA binding: 0.02633	damaged DNA binding: 0.02969	unfolded protein binding: 0.03851
1463	2	P54920, P63027,	0	0	P54920, P63027,	1	66.3333	1.6997	66.3333	67.5958	0.000218785	SNARE_complex_(HGS,_SNAP25,_STX13)::SNARE_complex_(SNAP25,_VAMP3,_VAMP2,_NAPB,_STX13)::SNARE_complex_(VAMP2,_SNAP25,_STX13)	0.0833	6	SNARE_complex_(HGS,_SNAP25,_STX13)::SNARE_complex_(SNAP25,_VAMP3,_VAMP2,_NAPB,_STX13)::SNARE_complex_(VAMP2,_SNAP25,_STX13)	0.0833	6	syntaxin-1 binding: 0.00334	myosin binding: 0.003436	syntaxin binding: 0.005126	protein complex binding: 0.02053	calmodulin binding: 0.02499	protein C-terminus binding: 0.02857	phospholipid binding: 0.05044
1415	2	Q9UNZ2, P78371,	307.667	8.2192	Q9UNZ2, P78371,	1	1232.67	22.4549	925	67.0021	0.000222678	CCT_micro-complex	0.0625	8	CCT_micro-complex	0.0625	8	lipid binding: 0.01568	unfolded protein binding: 0.01578
1227	2	Q8TB36, P07602,	101.333	1.8856	Q8TB36, P07602,	1	3.6667	1.8856	-97.6666	63.4369	0.000248401							enzyme activator activity: 0.006427	lipid binding: 0.01568
1644	61	P62851, P18621, P62854, P62857, P50914, Q07020, P05388, P62979, P39019, Q12906, P62910, P62424, P61513, P62913, P62280, P30050, P62847, P62753, P62750, P52272, P25398, P62899, P46782, Q02543, P62266, P62241, P36578, P62244, P62263, Q71UM5, P62249, P62917, Q96L21, P32969, P62906, P39023, P83731, P46777, P23396, P61313, P46778, P62829, P35268, P15880, P08708, P61247, P08865, P18124, P68104, P84098,…	140	3.559	P62851, P18621, P62854, P62857, P50914, P05388, P62979, P39019, P46782, P62910, P62424, P30050, P62913, P62280, Q02543, P62917, P62753, P62750, P52272, P25398, P62899, Q07020, P26373, P62266, P62241, P36578, P62244, P62263, Q71UM5, P62249, P61513, Q96L21, P32969, P62906, P39023, P83731, P46777, P23396, P61313, P46778, P62829, P35268, P15880, P08708, P61247, Q12906, P08865, P18124, P68104, P84098,…	1	2.3333	1.2472	-137.667	63.228	0.000250045	40S_ribosomal_subunit,_cytoplasmic::Nop56p-associated_pre-rRNA_complex::TRBP_containing_complex_(DICER,_RPL7A,_EIF6,_MOV10_and_subunits_of_the_60S_ribosomal_particle)::DICER1-NCOA6-AGO2_complex::RNA-induced_silencing_complex,_RISC::TRBP_containing_complex_(DICER,_TRBP,_AGO2,_RPL7A,_EIF6,_MOV10)::FIB-associated_protein_complex	0.4129	129	40S_ribosomal_subunit,_cytoplasmic::Nop56p-associated_pre-rRNA_complex::TRBP_containing_complex_(DICER,_RPL7A,_EIF6,_MOV10_and_subunits_of_the_60S_ribosomal_particle)::DICER1-NCOA6-AGO2_complex::RNA-induced_silencing_complex,_RISC::TRBP_containing_complex_(DICER,_TRBP,_AGO2,_RPL7A,_EIF6,_MOV10)::FIB-associated_protein_complex	0.4129	129	structural constituent of ribosome: 1.746e-105	RNA binding: 2.072e-31	rRNA binding: 7.462e-10	mRNA binding: 1.875e-07	ATP binding: 0.003074	fibroblast growth factor binding: 0.006368	laminin receptor activity: 0.008807	5S rRNA binding: 0.008807	mRNA 5'-UTR binding: 0.01603	metal ion binding: 0.01664	translation regulator activity: 0.02456	DNA binding: 0.03193	nucleic acid binding: 0.0406	protein kinase binding: 0.04454	translation initiation factor binding: 0.04523	protein kinase A binding: 0.05324	translation activator activity: 0.05456	DNA N-glycosylase activity: 0.05719	RNA cap binding: 0.06111	DNA-(apurinic or apyrimidinic site) lyase activity: 0.06499	protein binding: 0.07334	cysteine-type endopeptidase activator activity involved in apoptotic process: 0.07391	laminin binding: 0.07643	iron-sulfur cluster binding: 0.0948
1599	2	O75367, P45973,	274.667	0.9428	O75367, P45973,	1	45.3333	6.2361	-229.333	62.9807	0.000252012	MBD1-Suv39h1-HP1_complex	0.1667	3	MBD1-Suv39h1-HP1_complex	0.1667	3	chromatin binding: 0.0006746	methylated histone residue binding: 0.005367	repressing transcription factor binding: 0.005945	protein binding bridging: 0.007053	histone deacetylase binding: 0.009937	enzyme binding: 0.0378	protein heterodimerization activity: 0.04915	protein homodimerization activity: 0.08226
1046	2	Q01105, Q9NU22,	339	10.8012	Q01105, Q9NU22,	1	3	0	-336	53.88	0.000344286							protein phosphatase type 2A regulator activity: 0.003195	protein phosphatase inhibitor activity: 0.003291	histone binding: 0.009121	unfolded protein binding: 0.01578	ATPase activity: 0.02096
329	10	P03915, P03886, P49821, O75251, P19404, P28331, O75306, Q9Y6M9, O96000, O00217,	0	0	P03915, P03886, P49821, O75251, P19404, P28331, O75306, Q9Y6M9, O96000, O00217,	1	21	0.8165	21	44.5475	0.000503529	Respiratory_chain_complex_I_(beta_subunit)_mitochondrial::Respiratory_chain_complex_I_(gamma_subunit)_mitochondrial::Respiratory_chain_complex_I_(holoenzyme),_mitochondrial::Respiratory_chain_complex_I_(incomplete_intermediate),_mitochondrial::Respiratory_chain_complex_I_(intermediate_I/200kD_and_III/250kD),_mitochondrial::Respiratory_chain_complex_I_(intermediate_II/230kD),_mitochondrial::Respir…	0.2174	46	Respiratory_chain_complex_I_(beta_subunit)_mitochondrial::Respiratory_chain_complex_I_(gamma_subunit)_mitochondrial::Respiratory_chain_complex_I_(holoenzyme),_mitochondrial::Respiratory_chain_complex_I_(incomplete_intermediate),_mitochondrial::Respiratory_chain_complex_I_(intermediate_I/200kD_and_III/250kD),_mitochondrial::Respiratory_chain_complex_I_(intermediate_II/230kD),_mitochondrial::Respir…	0.2174	46	NADH dehydrogenase (ubiquinone) activity: 1.731e-26	4 iron 4 sulfur cluster binding: 9.654e-11	NADH dehydrogenase activity: 1.166e-08	oxidoreductase activity acting on NAD(P)H: 1.65e-07	quinone binding: 2.136e-05	electron carrier activity: 2.875e-05	2 iron 2 sulfur cluster binding: 6.418e-05	iron-sulfur cluster binding: 0.0001297	NAD binding: 0.0004939	metal ion binding: 0.0008198	oxidoreductase activity acting on NAD(P)H quinone or similar compound as acceptor: 0.006987	FMN binding: 0.01294	protease binding: 0.04973
1221	2	P50990, Q96T51,	5	2.1602	P50990, Q96T51,	1	74.6667	1.8856	69.6667	42.0822	0.000564203	CCT_micro-complex	0.0625	8	CCT_micro-complex	0.0625	8	ATPase activity coupled: 0.002324	protein transporter activity: 0.01176	lipid binding: 0.01568	unfolded protein binding: 0.01578
1734	3	P12814, P35609, O43707,	0.3333	0.4714	P12814, P35609,	0.6667	60.3333	3.2998	60	31.1772	0.0010272	Ternary_complex_(LRRC7,_CAMK2a,_ACTN4)	0.1111	3	CAS-SRC-FAK_complex::Polycystin-1_multiprotein_complex_(ACTN1,_CDH1,_SRC,_JUP,_VCL,_CTNNB1,_PXN,_BCAR1,_PKD1,_PTK2,_TLN1)::Polycystin-1-E-cadherin-beta-catenin_complex::Polycystin-1-E-cadherin-beta-catenin-Flotillin-2_complex::PXN-ITGB5-PTK2_complex	0.0385	13	integrin binding: 2.962e-07	actin filament binding: 5.307e-07	actin binding: 2.006e-05	ion channel binding: 0.0001005	calcium ion binding: 0.0001129	titin Z domain binding: 0.0002908	FATZ binding: 0.0003635	thyroid hormone receptor coactivator activity: 0.0009448	nucleoside binding: 0.001526	LIM domain binding: 0.002251	titin binding: 0.002758	vinculin binding: 0.006372	structural constituent of muscle: 0.01147	cytoskeletal protein binding: 0.01505	protein N-terminus binding: 0.02242	protein dimerization activity: 0.03132	protein domain specific binding: 0.04155	protein binding: 0.07615
1578	2	Q6ZMR3, P40926,	133	7.3485	Q6ZMR3, P40926,	1	3	0	-130	30.6412	0.0010634							malate dehydrogenase (NADP+) activity: 0.0001454	L-malate dehydrogenase activity: 0.0005331	L-lactate dehydrogenase activity: 0.001211	protein self-association: 0.004305
1434	2	P12236, P31930,	17	0.8165	P12236, P31930,	1	0.3333	0.4714	-16.6667	30.6187	0.00106496							ATP:ADP antiporter activity: 9.696e-05	ubiquinol-cytochrome-c reductase activity: 0.0003878	protein complex binding: 0.02053	transporter activity: 0.03017
1838	58	P62851, P18621, P62854, P62857, P50914, Q07020, P05388, P62979, P39019, Q12906, P07355, P62424, P61513, P62913, P62280, P30050, P62847, P62753, P62750, P52272, P25398, P62899, P46782, Q02543, P62266, P62241, P36578, P62244, P62263, Q71UM5, P62249, P62917, P32969, P62906, P39023, P83731, P46777, P23396, P61313, P46778, P62829, P35268, P15880, P08708, P61247, P08865, P18124, P84098, P62701, P27635,…	11.3333	3.3993	P62851, P18621, P62854, P62857, P50914, Q07020, P05388, P62979, P39019, Q12906, P07355, P62424, P46776, P61513, P62913, P62280, P30050, P62847, P62753, P62750, P52272, P25398, P62899, P46782, Q02543, P62266, P62241, P36578, P62244, P62263, Q71UM5, P62249, P62917, Q96L21, P32969, P62906, P39023, P83731, P46777, P23396, P61313, P46778, P62829, P35268, P15880, P08708, P61247, P08865, P18124, P84098,…	0.9667	96	3.559	84.6667	29.7969	0.00112441	40S_ribosomal_subunit,_cytoplasmic::Nop56p-associated_pre-rRNA_complex::TRBP_containing_complex_(DICER,_RPL7A,_EIF6,_MOV10_and_subunits_of_the_60S_ribosomal_particle)::DICER1-NCOA6-AGO2_complex::RNA-induced_silencing_complex,_RISC::TRBP_containing_complex_(DICER,_TRBP,_AGO2,_RPL7A,_EIF6,_MOV10)::FIB-associated_protein_complex	0.4043	129	40S_ribosomal_subunit,_cytoplasmic::Nop56p-associated_pre-rRNA_complex::TRBP_containing_complex_(DICER,_RPL7A,_EIF6,_MOV10_and_subunits_of_the_60S_ribosomal_particle)::DICER1-NCOA6-AGO2_complex::RNA-induced_silencing_complex,_RISC::TRBP_containing_complex_(DICER,_TRBP,_AGO2,_RPL7A,_EIF6,_MOV10)::FIB-associated_protein_complex	0.4052	129	structural constituent of ribosome: 8.806e-103	RNA binding: 1.539e-32	rRNA binding: 5.464e-10	mRNA binding: 2.651e-06	fibroblast growth factor binding: 0.005786	laminin receptor activity: 0.008377	5S rRNA binding: 0.008377	mRNA 5'-UTR binding: 0.01525	metal ion binding: 0.02234	translation regulator activity: 0.02338	DNA binding: 0.04071	translation initiation factor binding: 0.0431	protein kinase A binding: 0.05076	translation activator activity: 0.05202	DNA N-glycosylase activity: 0.05454	DNA-(apurinic or apyrimidinic site) lyase activity: 0.062	phospholipase inhibitor activity: 0.06691	protein binding: 0.06944	cysteine-type endopeptidase activator activity involved in apoptotic process: 0.07055	laminin binding: 0.07296	iron-sulfur cluster binding: 0.0906	NF-kappaB binding: 0.09858
1366	2	P40855, P04792,	53	3.266					-53	28.1074	0.00126339							protein kinase C inhibitor activity: 0.0001939	peroxisome membrane class-1 targeting sequence binding: 0.0002908	ATPase binding: 0.003871	protein kinase C binding: 0.006234	ubiquitin binding: 0.00739	protein N-terminus binding: 0.01506	protein kinase binding: 0.04735	identical protein binding: 0.06927
66	60	P62851, P18621, P62854, P62857, P50914, P05388, P62979, P39019, P46782, P62910, P62424, P30050, P62913, P62280, Q02543, P62917, P62753, P62750, P52272, P25398, P62899, P62277, P26373, P62266, P62241, P36578, P62244, P62263, Q71UM5, P62249, P61513, Q96L21, P32969, P62906, P39023, P83731, P46777, P23396, P61313, P46778, P62829, P35268, P15880, P08708, P61247, Q12906, P08865, P18124, P84098, P62701,…	0	0	P62851, P18621, P62854, P62857, P05388, P62979, P39019, P46782, P62910, P62424, P30050, P62913, P62280, Q02543, P50914, P62753, P62750, P52272, P25398, P62899, P62277, P26373, P62266, P62241, P36578, P62244, P62263, Q71UM5, P62249, P61513, P62917, Q96L21, P32969, P62906, P39023, P83731, P46777, P23396, P61313, P08238, P46778, P62829, P35268, P15880, P08708, P61247, Q12906, P08865, P18124, P84098,…	0.9836	147.667	9.5685	147.667	26.73	0.00139666	40S_ribosomal_subunit,_cytoplasmic::Nop56p-associated_pre-rRNA_complex::TRBP_containing_complex_(DICER,_RPL7A,_EIF6,_MOV10_and_subunits_of_the_60S_ribosomal_particle)::DICER1-NCOA6-AGO2_complex::RNA-induced_silencing_complex,_RISC::TRBP_containing_complex_(DICER,_TRBP,_AGO2,_RPL7A,_EIF6,_MOV10)::FIB-associated_protein_complex	0.4052	129	40S_ribosomal_subunit,_cytoplasmic::Nop56p-associated_pre-rRNA_complex::TRBP_containing_complex_(DICER,_RPL7A,_EIF6,_MOV10_and_subunits_of_the_60S_ribosomal_particle)::DICER1-NCOA6-AGO2_complex::RNA-induced_silencing_complex,_RISC::TRBP_containing_complex_(DICER,_TRBP,_AGO2,_RPL7A,_EIF6,_MOV10)::FIB-associated_protein_complex	0.4129	129	structural constituent of ribosome: 1.157e-106	RNA binding: 8.927e-32	rRNA binding: 6.738e-10	mRNA binding: 1.671e-07	ATP binding: 0.003443	fibroblast growth factor binding: 0.006172	laminin receptor activity: 0.008664	5S rRNA binding: 0.008664	mRNA 5'-UTR binding: 0.01577	metal ion binding: 0.01837	translation regulator activity: 0.02416	DNA binding: 0.03465	nucleic acid binding: 0.04321	translation initiation factor binding: 0.04452	protein kinase A binding: 0.05241	translation activator activity: 0.05372	DNA N-glycosylase activity: 0.05631	RNA cap binding: 0.06017	DNA-(apurinic or apyrimidinic site) lyase activity: 0.064	cysteine-type endopeptidase activator activity involved in apoptotic process: 0.0728	laminin binding: 0.07528	protein binding: 0.08227	iron-sulfur cluster binding: 0.09341
804	2	P60981, P13489,	3	0.8165	P60981, P13489,	1	48	2.9439	45	25.5128	0.0015328							ribonuclease inhibitor activity: 0.0005331	actin binding: 0.05292
1771	2	P19404, O95168,	15.3333	0.9428	P19404, O95168,	1	0.3333	0.4714	-15	24.6478	0.00164201	Respiratory_chain_complex_I_(beta_subunit)_mitochondrial::Respiratory_chain_complex_I_(gamma_subunit)_mitochondrial::Respiratory_chain_complex_I_(holoenzyme),_mitochondrial::Respiratory_chain_complex_I_(incomplete_intermediate),_mitochondrial::Respiratory_chain_complex_I_(intermediate_I/200kD_and_III/250kD),_mitochondrial::Respiratory_chain_complex_I_(intermediate_II/230kD),_mitochondrial::Respir…	0.0435	46	Respiratory_chain_complex_I_(beta_subunit)_mitochondrial::Respiratory_chain_complex_I_(gamma_subunit)_mitochondrial::Respiratory_chain_complex_I_(holoenzyme),_mitochondrial::Respiratory_chain_complex_I_(incomplete_intermediate),_mitochondrial::Respiratory_chain_complex_I_(intermediate_I/200kD_and_III/250kD),_mitochondrial::Respiratory_chain_complex_I_(intermediate_II/230kD),_mitochondrial::Respir…	0.0435	46	NADH dehydrogenase (ubiquinone) activity: 7.569e-06	2 iron 2 sulfur cluster binding: 0.002421	electron carrier activity: 0.01257	oxidoreductase activity: 0.02867
1869	2	P50990, Q9GZZ9,	115.333	7.7603	P50990, Q9GZZ9,	1	8.3333	0.4714	-107	23.8378	0.00175519	CCT_micro-complex	0.0625	8	CCT_micro-complex	0.0625	8	UFM1 activating enzyme activity: 0.0002908	ATPase activity coupled: 0.002324	cofactor binding: 0.00334	oxidoreductase activity acting on the CH-OH group of donors NAD or NADP as acceptor: 0.004305	ATP binding: 0.0148	unfolded protein binding: 0.01578	catalytic activity: 0.04231
477	6	P62312, Q9UK45, P62310, Q9Y4Y9, Q9Y333, Q9Y4Z0,	0	0	P62312, Q9UK45, P62310, Q9Y4Y9, Q9Y333, Q9Y4Z0,	1	100.667	7.4087	100.667	23.5345	0.0018006	(E.F.G)_complex::12S_U11_snRNP::6S_methyltransferase_and_RG-containing_Sm_proteins_complex::20S_methylosome-SmD_complex::20S_methylosome_and_RG-containing_Sm_protein_complex::6S_methyltransferase_complex::JBP1-pICln_complex::SMN_complex,_U7_snRNA_specific::20S_methyltransferase_complex::AR_coactivator_complex::17S_U2_snRNP::SF3A1-SF3A2-SF3A3_complex::SF3b_complex::Exon_junction_complex::SRm160/30…	0.0245	245	(E.F.G)_complex::12S_U11_snRNP::6S_methyltransferase_and_RG-containing_Sm_proteins_complex::20S_methylosome-SmD_complex::20S_methylosome_and_RG-containing_Sm_protein_complex::6S_methyltransferase_complex::JBP1-pICln_complex::SMN_complex,_U7_snRNA_specific::20S_methyltransferase_complex::AR_coactivator_complex::17S_U2_snRNP::SF3A1-SF3A2-SF3A3_complex::SF3b_complex::Exon_junction_complex::SRm160/30…	0.0245	245	U6 snRNA binding: 6.172e-06	RNA binding: 8.191e-05	protein binding: 0.005797
1212	2	P31689, P07602,	7.3333	3.8586	P31689, P07602,	1	117	7.7889	109.667	21.8525	0.00208754							low-density lipoprotein particle receptor binding: 0.001792	heat shock protein binding: 0.003146	enzyme activator activity: 0.006427	lipid binding: 0.01568	unfolded protein binding: 0.01578
775	2	Q9NVM9, Q9BXJ9,	19.3333	1.2472	Q9NVM9, Q9BXJ9,	1	2.6667	0.4714	-16.6666	21.6509	0.00212649	53BP1-containing_complex::Ku_antigen-NARG1_complex::Ku_antigen-YY1-alphaMyHC_promoter_complex::PCNA-KU_antigen_complex::KIN17-PCNA-RPA70_complex	0.0556	9	53BP1-containing_complex::Ku_antigen-NARG1_complex::Ku_antigen-YY1-alphaMyHC_promoter_complex::PCNA-KU_antigen_complex::KIN17-PCNA-RPA70_complex	0.0556	9	acetyltransferase activity: 0.001114	N-acetyltransferase activity: 0.003291	ribosome binding: 0.004209
504	6	P62312, Q9UK45, P62310, Q9Y333, Q9Y4Z0, Q5JSH3,	106	8.641	P62312, Q9UK45, P62310, Q9Y333, Q9Y4Z0, Q5JSH3,	1	2.3333	1.2472	-103.667	20.5664	0.00235584	(E.F.G)_complex::12S_U11_snRNP::6S_methyltransferase_and_RG-containing_Sm_proteins_complex::20S_methylosome-SmD_complex::20S_methylosome_and_RG-containing_Sm_protein_complex::6S_methyltransferase_complex::JBP1-pICln_complex::SMN_complex,_U7_snRNA_specific::20S_methyltransferase_complex::AR_coactivator_complex::17S_U2_snRNP::SF3A1-SF3A2-SF3A3_complex::SF3b_complex::Exon_junction_complex::SRm160/30…	0.017	245	(E.F.G)_complex::12S_U11_snRNP::6S_methyltransferase_and_RG-containing_Sm_proteins_complex::20S_methylosome-SmD_complex::20S_methylosome_and_RG-containing_Sm_protein_complex::6S_methyltransferase_complex::JBP1-pICln_complex::SMN_complex,_U7_snRNA_specific::20S_methyltransferase_complex::AR_coactivator_complex::17S_U2_snRNP::SF3A1-SF3A2-SF3A3_complex::SF3b_complex::Exon_junction_complex::SRm160/30…	0.017	245	U6 snRNA binding: 6.172e-06	RNA binding: 0.002095	protein binding: 0.04729
169	4	P50454, O43396, P07237, Q15084,	92.6667	7.4087	P50454, O43396, P07237, Q15084,	1	6.6667	1.6997	-86	19.5965	0.00259388							protein disulfide oxidoreductase activity: 4.426e-08	protein disulfide isomerase activity: 1.122e-05	isomerase activity: 1.746e-05	disulfide oxidoreductase activity: 0.001066	procollagen-proline 4-dioxygenase activity: 0.002226	collagen binding: 0.01742	serine-type endopeptidase inhibitor activity: 0.02277	unfolded protein binding: 0.03105	protein heterodimerization activity: 0.09341
1531	2	P11142, P34932,	32.6667	3.3993					-32.6667	16.6447	0.00359008	DNAJB2-HSPA8-PSMA3_complex	0.1667	3				ATPase activity coupled: 0.002324	ATP binding: 0.0148	unfolded protein binding: 0.01578
1109	2	Q99832, P17661,	316.333	5.7927	Q99832, P17661,	1	383	4.3205	66.6667	15.9787	0.00389379	CCT_micro-complex	0.0625	8	CCT_micro-complex	0.0625	8	identical protein binding: 0.00129	cytoskeletal protein binding: 0.01008	structural constituent of cytoskeleton: 0.01573	unfolded protein binding: 0.01578
914	2	Q9NZI7, Q13263,	0	0	Q9NZI7, Q13263,	1	4.3333	0.4714	4.3333	15.9217	0.00392157	Emerin-actin-NMI-(alphaII)spectrin_complex::Emerin-actin-NMI_complex::Emerin_architectural_complex::Emerin_complex_32::Emerin_regulatory_complex::Emerin_complex_24::Emerin_complex_1::MCM2-MCM4-MCM6-MCM7_complex::MCM2-MCM6-MCM7_complex::MCM4-MCM6-MCM7_complex::MCM_complex::NCOR1_complex	0.0111	45	Emerin-actin-NMI-(alphaII)spectrin_complex::Emerin-actin-NMI_complex::Emerin_architectural_complex::Emerin_complex_32::Emerin_regulatory_complex::Emerin_complex_24::Emerin_complex_1::MCM2-MCM4-MCM6-MCM7_complex::MCM2-MCM6-MCM7_complex::MCM4-MCM6-MCM7_complex::MCM_complex::NCOR1_complex	0.0111	45	transcription corepressor activity: 0.0001866	Krueppel-associated box domain binding: 0.0002424	chromo shadow domain binding: 0.0009691	sequence-specific DNA binding transcription factor activity: 0.004193	DNA binding: 0.01533	ubiquitin protein ligase binding: 0.0256	transcription coactivator activity: 0.03209	ubiquitin-protein ligase activity: 0.035	protein kinase activity: 0.05461	sequence-specific DNA binding: 0.06516
1851	59	P62851, P18621, P62854, Q07020, P05388, P62979, P39019, P46782, P62910, P62424, P46776, P30050, P62913, P62280, Q02543, P50914, P62753, P62750, P52272, P25398, P62899, Q12906, P26373, P62266, P62241, P36578, P62244, P62263, Q71UM5, P62249, P62917, Q96L21, P63220, P62906, P39023, P83731, P46777, P23396, P61313, P46778, P62829, P35268, P15880, P08708, P61247, P08865, P18124, P84098, P62701, P62847,…	0.3333	0.4714	P62851, P18621, P62854, Q07020, P05388, P62979, P39019, P46782, P62910, P62424, P46776, P30050, P62913, P62280, Q02543, P50914, P62753, P62750, P52272, P25398, P62899, Q12906, Q12905, P26373, P62266, P62241, P36578, P62244, P62263, Q71UM5, P62249, P62917, Q96L21, P63220, P62906, P39023, P83731, P46777, P23396, P61313, P46778, P62829, P35268, P15880, P08708, P61247, P08865, P18124, P84098, P62701,…	0.9833	16.3333	1.6997	16	15.7115	0.00402659	40S_ribosomal_subunit,_cytoplasmic::Nop56p-associated_pre-rRNA_complex::TRBP_containing_complex_(DICER,_RPL7A,_EIF6,_MOV10_and_subunits_of_the_60S_ribosomal_particle)::DICER1-NCOA6-AGO2_complex::RNA-induced_silencing_complex,_RISC::TRBP_containing_complex_(DICER,_TRBP,_AGO2,_RPL7A,_EIF6,_MOV10)::FIB-associated_protein_complex	0.3975	129	40S_ribosomal_subunit,_cytoplasmic::Nop56p-associated_pre-rRNA_complex::TRBP_containing_complex_(DICER,_RPL7A,_EIF6,_MOV10_and_subunits_of_the_60S_ribosomal_particle)::DICER1-NCOA6-AGO2_complex::RNA-induced_silencing_complex,_RISC::TRBP_containing_complex_(DICER,_TRBP,_AGO2,_RPL7A,_EIF6,_MOV10)::FIB-associated_protein_complex	0.4052	129	structural constituent of ribosome: 1.011e-104	RNA binding: 3.754e-32	rRNA binding: 6.073e-10	mRNA binding: 2.932e-06	fibroblast growth factor binding: 0.005978	laminin receptor activity: 0.008521	5S rRNA binding: 0.008521	mRNA 5'-UTR binding: 0.01551	metal ion binding: 0.02027	translation regulator activity: 0.02377	DNA binding: 0.03758	translation initiation factor binding: 0.04381	protein kinase A binding: 0.05159	translation activator activity: 0.05287	DNA N-glycosylase activity: 0.05543	DNA-(apurinic or apyrimidinic site) lyase activity: 0.063	cysteine-type endopeptidase activator activity involved in apoptotic process: 0.07167	laminin binding: 0.07412	protein binding: 0.07615	iron-sulfur cluster binding: 0.09201
791	2	P22102, P23381,	94	1.4142	P22102, P23381,	1	72.3333	2.0548	-21.6667	15.0447	0.00438903							phosphoribosylformylglycinamidine cyclo-ligase activity: 0.0003878	phosphoribosylglycinamide formyltransferase activity: 0.0003878	phosphoribosylamine-glycine ligase activity: 0.0003878	tryptophan-tRNA ligase activity: 0.001308	aminoacyl-tRNA ligase activity: 0.003629	ATP binding: 0.0148	methyltransferase activity: 0.01515	catalytic activity: 0.04231
131	60	P62851, P18621, P50914, P62857, P05388, P62979, P39019, P46782, P62424, P61513, P62913, P62280, Q02543, Q9UHX1, P62854, P62753, P62750, P52272, P25398, P62899, Q07020, Q12905, P26373, P62266, P62241, P36578, P62244, P62263, Q71UM5, P62249, P62917, Q96L21, P32969, P62906, P39023, P83731, P46777, P23396, P61313, P46778, P62829, P35268, P15880, P08708, P61247, Q12906, P08865, P18124, P84098, P62701,…	27.3333	3.2998	P62851, P18621, P50914, P62857, P05388, P62979, P39019, P46782, P62424, P61513, P62913, P62280, Q02543, Q9UHX1, P62854, P62753, P62750, P52272, P25398, P62899, Q07020, Q12905, P26373, P62266, P62241, P36578, P62244, P62263, Q71UM5, P62249, P62917, Q96L21, P32969, P62906, P39023, P83731, P46777, P23396, P61313, P46778, P62829, P35268, P15880, P08708, P61247, Q12906, P08865, P18124, P84098, P62701,…	1	0	0	-27.3333	14.3471	0.00482302	40S_ribosomal_subunit,_cytoplasmic::Nop56p-associated_pre-rRNA_complex::TRBP_containing_complex_(DICER,_RPL7A,_EIF6,_MOV10_and_subunits_of_the_60S_ribosomal_particle)::DICER1-NCOA6-AGO2_complex::RNA-induced_silencing_complex,_RISC::TRBP_containing_complex_(DICER,_TRBP,_AGO2,_RPL7A,_EIF6,_MOV10)::FIB-associated_protein_complex	0.4052	129	40S_ribosomal_subunit,_cytoplasmic::Nop56p-associated_pre-rRNA_complex::TRBP_containing_complex_(DICER,_RPL7A,_EIF6,_MOV10_and_subunits_of_the_60S_ribosomal_particle)::DICER1-NCOA6-AGO2_complex::RNA-induced_silencing_complex,_RISC::TRBP_containing_complex_(DICER,_TRBP,_AGO2,_RPL7A,_EIF6,_MOV10)::FIB-associated_protein_complex	0.4052	129	structural constituent of ribosome: 1.5e-103	RNA binding: 2.972e-33	rRNA binding: 6.738e-10	mRNA binding: 3.236e-06	ATP binding: 0.003443	fibroblast growth factor binding: 0.006172	laminin receptor activity: 0.008664	5S rRNA binding: 0.008664	double-stranded RNA binding: 0.008801	mRNA 5'-UTR binding: 0.01577	metal ion binding: 0.01837	translation regulator activity: 0.02416	nucleic acid binding: 0.04321	translation initiation factor binding: 0.04452	protein kinase A binding: 0.05241	translation activator activity: 0.05372	DNA N-glycosylase activity: 0.05631	nucleotide binding: 0.06193	DNA-(apurinic or apyrimidinic site) lyase activity: 0.064	protein binding: 0.06677	cysteine-type endopeptidase activator activity involved in apoptotic process: 0.0728	laminin binding: 0.07528	iron-sulfur cluster binding: 0.09341
1812	2	P62834, P60953,	31.3333	3.6818	P62834, P60953,	1	0.6667	0.4714	-30.6666	14.3099	0.004848	ITGB1-RAP1A-PKD1_complex	0.1667	3	ITGB1-RAP1A-PKD1_complex	0.1667	3	apolipoprotein A-I receptor binding: 0.0002424	GTPase activity: 0.0003257	GTP binding: 0.0007563	Rap guanyl-nucleotide exchange factor activity: 0.00126	GTP-dependent protein binding: 0.001599	thioesterase binding: 0.001695	mitogen-activated protein kinase kinase kinase binding: 0.002421	Ras GTPase binding: 0.003436	protein transporter activity: 0.01176	protein complex binding: 0.02053	protein kinase binding: 0.04735	identical protein binding: 0.06927
1505	2	Q13185, Q9C0C2,	56.3333	7.1336	Q13185, Q9C0C2,	1	0	0	-56.3333	13.6778	0.00530274	CENP-A_NAC-CAD_complex::CENP-A_nucleosome_associated_complex::CEN_complex::FACT-NEK9_complex	0.0114	44	CENP-A_NAC-CAD_complex::CENP-A_nucleosome_associated_complex::CEN_complex::FACT-NEK9_complex	0.0114	44	enzyme binding: 0.0003709	ankyrin binding: 0.003291	protein domain specific binding: 0.0281	identical protein binding: 0.06927
1460	2	Q8NE86, Q96QD8,	8	0	Q8NE86, Q96QD8,	1	4.3333	0.4714	-3.6667	13.4724	0.00546432							uniporter activity: 4.848e-05	amino acid transmembrane transporter activity: 0.002905	symporter activity: 0.006379	calcium channel activity: 0.007727
674	2	P54278, P46459,	0.3333	0.4714	P54278, P46459,	1	5.3333	0.4714	5	12.9905	0.00587365	BASC_(Ab_80)_complex_(BRCA1-associated_genome_surveillance_complex)::BASC_complex_(BRCA1-associated_genome_surveillance_complex)::BASC_(Ab_81)_complex_(BRCA1-associated_genome_surveillance_complex)::BASC_(Ab_C-20)_complex_(BRCA1-associated_genome_surveillance_complex)::BRCA1-RAD50-MRE11-NBS1_complex::MRN_complex_(MRE11-RAD50-NBN_complex)::MRN_complex_(MRE11-RAD50-NBS1_complex)::RAD50-MRE11-NBN-p2…	0.0185	27	BASC_(Ab_80)_complex_(BRCA1-associated_genome_surveillance_complex)::BASC_complex_(BRCA1-associated_genome_surveillance_complex)::BASC_(Ab_81)_complex_(BRCA1-associated_genome_surveillance_complex)::BASC_(Ab_C-20)_complex_(BRCA1-associated_genome_surveillance_complex)::BRCA1-RAD50-MRE11-NBS1_complex::MRN_complex_(MRE11-RAD50-NBN_complex)::MRN_complex_(MRE11-RAD50-NBS1_complex)::RAD50-MRE11-NBN-p2…	0.0185	27	single base insertion or deletion binding: 9.696e-05	ATPase activity coupled: 0.002324	MutSalpha complex binding: 0.002566	mismatched DNA binding: 0.003388	syntaxin binding: 0.005126	endonuclease activity: 0.006572	PDZ domain binding: 0.009841	single-stranded DNA binding: 0.0107	ATP binding: 0.0148	protein complex binding: 0.02053	ATPase activity: 0.02096
761	2	P50748, O43264,	27.6667	0.4714	P50748, O43264,	1	40.6667	1.6997	13	12.7656	0.00608057	SNARE_complex_(RINT1,_ZW10,_p31)	0.1667	3	SNARE_complex_(RINT1,_ZW10,_p31)	0.1667	3	centromeric DNA binding: 0.001114
762	2	Q7Z460, O43264,	91.6667	1.6997	Q7Z460, O43264,	1	72.6667	2.0548	-19	12.3408	0.00650222	SNARE_complex_(RINT1,_ZW10,_p31)	0.1667	3	SNARE_complex_(RINT1,_ZW10,_p31)	0.1667	3	kinetochore binding: 0.0004847	centromeric DNA binding: 0.001114	microtubule plus-end binding: 0.002566	microtubule binding: 0.02536
1738	8	Q15545, Q15542, P49848, Q16594, O00268, P21675, Q5VWG9, Q12962,	17.6667	2.0548	Q15545, Q15542, P49848, Q16594, O00268, P21675, Q5VWG9, Q12962,	1	1.6667	0.9428	-16	12.2581	0.00658934	DAB_complex::DA_complex::TFIID_subcomplex::Transcription_initiation_factor_complex_(TAF1,_TAF5,_TAF11,_TAF12,_TBP)::Transcription_initiation_factor_complex_(TAF5,_TAF6,_TAF9,_TAF11,_TBP)::TFIID-beta_complex::TFIID_complex::TFIID_complex,_B-cell_specific::TFIIA-TRF2_complex::GCN5-TRRAP_histone_acetyltransferase_complex::STAGA_core_complex_(SPT3-TAF9-GCN5_acetyltransferase_complex)::PCAF_complex::S…	0.2286	35	DAB_complex::DA_complex::TFIID_subcomplex::Transcription_initiation_factor_complex_(TAF1,_TAF5,_TAF11,_TAF12,_TBP)::Transcription_initiation_factor_complex_(TAF5,_TAF6,_TAF9,_TAF11,_TBP)::TFIID-beta_complex::TFIID_complex::TFIID_complex,_B-cell_specific::TFIIA-TRF2_complex::GCN5-TRRAP_histone_acetyltransferase_complex::STAGA_core_complex_(SPT3-TAF9-GCN5_acetyltransferase_complex)::PCAF_complex::S…	0.2286	35	histone acetyltransferase activity: 3.829e-09	transcription coactivator activity: 6.071e-08	transcription regulatory region DNA binding: 2.243e-06	p53 binding: 4.477e-06	sequence-specific DNA binding transcription factor activity: 5.205e-05	protein heterodimerization activity: 0.0007877	protein binding: 0.001041	RNA polymerase binding: 0.002709	vitamin D receptor binding: 0.007131	C2H2 zinc finger domain binding: 0.007705	histone acetyltransferase binding: 0.009234	transcription factor binding: 0.009419	histone acetyl-lysine binding: 0.009615	TBP-class protein binding: 0.01019	thyroid hormone receptor binding: 0.01512	estrogen receptor binding: 0.0155	activating transcription factor binding: 0.01851	DNA binding: 0.05488	protein dimerization activity: 0.07917
1900	2	Q04941, Q02127,	3.3333	0.4714					-3.3333	12.2474	0.00660074							dihydroorotate dehydrogenase activity: 0.0001939	chemokine binding: 0.0002424	dihydroorotate oxidase activity: 0.0002908	ubiquinone binding: 0.0007269	ion transmembrane transporter activity: 0.001357	FMN binding: 0.002615	drug binding: 0.008111
609	2	Q96P70, Q14974,	28.6667	0.4714	Q96P70, Q14974,	1	51.3333	3.3993	22.6666	11.4399	0.00755465	RANBP1-RAN-KPNB1_complex	0.1667	3	RANBP1-RAN-KPNB1_complex	0.1667	3	Ran GTPase binding: 6.294e-06	protein transporter activity: 3.484e-05	nuclear localization sequence binding: 0.001502	histone binding: 0.009121	protein domain specific binding: 0.0281
1265	2	Q99584, Q13043,	17.3333	2.6247					-17.3333	11.4383	0.00755668							RAGE receptor binding: 0.0006785	protein serine/threonine kinase activator activity: 0.00126	protein homodimerization activity: 0.001846	fibroblast growth factor binding: 0.003967	copper ion binding: 0.008496	lipid binding: 0.01568	protein dimerization activity: 0.0211	magnesium ion binding: 0.03026	transcription factor binding: 0.03817	protein serine/threonine kinase activity: 0.06063	identical protein binding: 0.06927	calcium ion binding: 0.09204
790	2	P23381, Q14258,	10.6667	0.4714	P23381, Q14258,	1	53	6.4807	42.3333	11.2843	0.00776195							tryptophan-tRNA ligase activity: 0.001308	aminoacyl-tRNA ligase activity: 0.003629	ubiquitin-protein ligase activity: 0.035
542	52	P62851, P62854, P62857, P50914, P05388, P39019, P46782, P62424, P30050, P62913, P62280, P61513, P62847, P62753, P62750, P52272, P62899, Q07020, P46781, Q02543, P62266, P62241, P36578, P62244, P62263, P62249, P62917, Q96L21, P62906, P55769, P46777, P23396, P61313, P46778, P84098, P35268, P15880, P08708, P61247, P08865, P18124, P62829, P62701, P27635, P62888, P62277, P63220, P26373, P61927, Q02878,…	3	1.633	P62851, P62854, P62857, P50914, P05388, P39019, P46782, P62424, P30050, P62913, P62280, P61513, P46777, P55769, P62753, P62750, P52272, P62899, Q07020, P46781, Q02543, P62266, P62241, P36578, P62244, P62263, P62249, P62917, Q96L21, P32969, P62906, P61353, P62847, P23396, P61313, P46778, P84098, P35268, P15880, P08708, P61247, P08865, P18124, P62829, P62701, P27635, P62888, P62277, P63220, P26373,…	0.963	18.3333	1.6997	15.3333	11.2675	0.00778483	40S_ribosomal_subunit,_cytoplasmic::Nop56p-associated_pre-rRNA_complex::TRBP_containing_complex_(DICER,_RPL7A,_EIF6,_MOV10_and_subunits_of_the_60S_ribosomal_particle)::DICER1-NCOA6-AGO2_complex::RNA-induced_silencing_complex,_RISC::TRBP_containing_complex_(DICER,_TRBP,_AGO2,_RPL7A,_EIF6,_MOV10)::FIB-associated_protein_complex	0.3579	129	40S_ribosomal_subunit,_cytoplasmic::Nop56p-associated_pre-rRNA_complex::TRBP_containing_complex_(DICER,_RPL7A,_EIF6,_MOV10_and_subunits_of_the_60S_ribosomal_particle)::DICER1-NCOA6-AGO2_complex::RNA-induced_silencing_complex,_RISC::TRBP_containing_complex_(DICER,_TRBP,_AGO2,_RPL7A,_EIF6,_MOV10)::FIB-associated_protein_complex	0.3734	129	structural constituent of ribosome: 2.408e-94	RNA binding: 2.082e-30	rRNA binding: 2.701e-12	mRNA binding: 1.388e-06	translation regulator activity: 0.0002081	fibroblast growth factor binding: 0.004696	laminin receptor activity: 0.007516	5S rRNA binding: 0.007516	mRNA 5'-UTR binding: 0.01369	metal ion binding: 0.0146	DNA binding: 0.02735	snoRNA binding: 0.03648	translation initiation factor binding: 0.03882	protein kinase A binding: 0.04575	DNA N-glycosylase activity: 0.04918	DNA-(apurinic or apyrimidinic site) lyase activity: 0.05596	protein binding: 0.05984	laminin binding: 0.06594	iron-sulfur cluster binding: 0.08206	NF-kappaB binding: 0.08938	protein kinase binding: 0.09474	ribosome binding: 0.09858
764	2	Q32MZ4, Q14204,	28.6667	3.3993	Q32MZ4, Q14204,	1	6	0.8165	-22.6667	11.23	0.00783633	(E.F.G)_complex::12S_U11_snRNP::6S_methyltransferase_and_RG-containing_Sm_proteins_complex::20S_methylosome-SmD_complex::20S_methylosome_and_RG-containing_Sm_protein_complex::6S_methyltransferase_complex::JBP1-pICln_complex::SMN_complex,_U7_snRNA_specific::20S_methyltransferase_complex::AR_coactivator_complex::17S_U2_snRNP::SF3A1-SF3A2-SF3A3_complex::SF3b_complex::Exon_junction_complex::SRm160/30…	0.002	245	(E.F.G)_complex::12S_U11_snRNP::6S_methyltransferase_and_RG-containing_Sm_proteins_complex::20S_methylosome-SmD_complex::20S_methylosome_and_RG-containing_Sm_protein_complex::6S_methyltransferase_complex::JBP1-pICln_complex::SMN_complex,_U7_snRNA_specific::20S_methyltransferase_complex::AR_coactivator_complex::17S_U2_snRNP::SF3A1-SF3A2-SF3A3_complex::SF3b_complex::Exon_junction_complex::SRm160/30…	0.002	245	ATPase activity coupled: 0.002324	double-stranded RNA binding: 0.004788	microtubule motor activity: 0.01176	protein homodimerization activity: 0.08226
1746	2	P16220, Q01658,	18.6667	1.2472	P16220, Q01658,	1	7.6667	1.2472	-11	10.802	0.00846167							sequence-specific DNA binding: 0.001136	cAMP response element binding: 0.001357	RNA polymerase II transcription factor binding transcription factor activity involved in positive regulation of transcription: 0.001792	RNA polymerase II distal enhancer sequence-specific DNA binding: 0.002469	TBP-class protein binding: 0.002566	RNA polymerase II activating transcription factor binding: 0.004788	transcription cofactor activity: 0.009121	RNA polymerase II distal enhancer sequence-specific DNA binding transcription factor activity: 0.0109	DNA binding: 0.01533	transcription corepressor activity: 0.02697	transcription factor binding: 0.03817	protein heterodimerization activity: 0.04915
1050	2	Q86V81, Q14669,	1.3333	0.4714	Q86V81, Q14669,	1	5.3333	0.4714	4	10.3924	0.00913244	(E.F.G)_complex::12S_U11_snRNP::6S_methyltransferase_and_RG-containing_Sm_proteins_complex::20S_methylosome-SmD_complex::20S_methylosome_and_RG-containing_Sm_protein_complex::6S_methyltransferase_complex::JBP1-pICln_complex::SMN_complex,_U7_snRNA_specific::20S_methyltransferase_complex::AR_coactivator_complex::17S_U2_snRNP::SF3A1-SF3A2-SF3A3_complex::SF3b_complex::Exon_junction_complex::SRm160/30…	0.002	245	(E.F.G)_complex::12S_U11_snRNP::6S_methyltransferase_and_RG-containing_Sm_proteins_complex::20S_methylosome-SmD_complex::20S_methylosome_and_RG-containing_Sm_protein_complex::6S_methyltransferase_complex::JBP1-pICln_complex::SMN_complex,_U7_snRNA_specific::20S_methyltransferase_complex::AR_coactivator_complex::17S_U2_snRNP::SF3A1-SF3A2-SF3A3_complex::SF3b_complex::Exon_junction_complex::SRm160/30…	0.002	245	thyroid hormone receptor binding: 0.003823	ubiquitin-protein ligase activity: 0.035	nucleotide binding: 0.05475	RNA binding: 0.09431
1704	4	P11021, P11142, P10809, P34932,	0.3333	0.4714	P11021, P11142, P10809, P34932,	1	22	3.7417	21.6667	9.95096	0.00994836	BRMS1-SIN3-HDAC_complex::HCF-1_complex	0.1125	20	BRMS1-SIN3-HDAC_complex::HCF-1_complex	0.1125	20	unfolded protein binding: 1.976e-06	chaperone binding: 6.15e-05	ATP binding: 0.000219	ATPase activity: 0.0006576	misfolded protein binding: 0.00213	DNA replication origin binding: 0.002226	lipopolysaccharide binding: 0.004445	ATPase activity coupled: 0.004638	ribosome binding: 0.008383	protein binding bridging: 0.01401	p53 binding: 0.01723	single-stranded DNA binding: 0.02118	ubiquitin protein ligase binding: 0.04988	protein domain specific binding: 0.05461
1367	2	P04792, O43847,	132	5.3541	P04792, O43847,	1	163	0.8165	31	9.91388	0.0100218							protein kinase C inhibitor activity: 0.0001939	epidermal growth factor binding: 0.0002908	protein kinase C binding: 0.006234	ubiquitin binding: 0.00739	metalloendopeptidase activity: 0.013	catalytic activity: 0.04231	protein kinase binding: 0.04735	identical protein binding: 0.06927
1689	6	P08107, P35579, P60660, Q9UJZ1, P08238, P25705,	2.6667	0.4714	P08107, P35579, P60660, Q9UJZ1, P08238, P25705,	1	0	0	-2.6667	9.79818	0.0102562	CRKL-WIPF1-WAS_complex::ZAP70-CRKL-WIPF1-WAS_complex::WIP-WASp-actin-myosin-IIa_complex	0.0833	8	CRKL-WIPF1-WAS_complex::ZAP70-CRKL-WIPF1-WAS_complex::WIP-WASp-actin-myosin-IIa_complex	0.0833	8	actin-dependent ATPase activity: 1.661e-05	cardiolipin binding: 0.0004362	motor activity: 0.0004501	sulfonylurea receptor binding: 0.0008721	CTP binding: 0.0008721	unfolded protein binding: 0.0009158	UTP binding: 0.001163	dATP binding: 0.001453	protein anchor: 0.001598	ATPase activity: 0.00161	protein binding involved in protein folding: 0.001888	ATP binding: 0.002535	TPR domain binding: 0.003047	nitric-oxide synthase regulator activity: 0.00377	proton-transporting ATP synthase activity rotational mechanism: 0.004925	protein binding: 0.005797	MHC class I protein binding: 0.006941	proton-transporting ATPase activity rotational mechanism: 0.007229	microfilament motor activity: 0.009667	virus receptor activity: 0.01281	ADP binding: 0.0138	transmembrane transporter activity: 0.01607	structural constituent of muscle: 0.02269	ion channel binding: 0.03391	protein N-terminus binding: 0.04383	actin filament binding: 0.04678	calmodulin binding: 0.07124	ubiquitin protein ligase binding: 0.0729
624	2	P40692, P54278,	0	0	P40692, P54278,	1	2.6667	0.4714	2.6667	9.79818	0.0102562	BASC_(Ab_80)_complex_(BRCA1-associated_genome_surveillance_complex)::BASC_complex_(BRCA1-associated_genome_surveillance_complex)::BASC_(Ab_81)_complex_(BRCA1-associated_genome_surveillance_complex)::BASC_(Ab_C-20)_complex_(BRCA1-associated_genome_surveillance_complex)::BRCA1-RAD50-MRE11-NBS1_complex::MRN_complex_(MRE11-RAD50-NBN_complex)::MRN_complex_(MRE11-RAD50-NBS1_complex)::RAD50-MRE11-NBN-p2…	0.0741	27	BASC_(Ab_80)_complex_(BRCA1-associated_genome_surveillance_complex)::BASC_complex_(BRCA1-associated_genome_surveillance_complex)::BASC_(Ab_81)_complex_(BRCA1-associated_genome_surveillance_complex)::BASC_(Ab_C-20)_complex_(BRCA1-associated_genome_surveillance_complex)::BRCA1-RAD50-MRE11-NBS1_complex::MRN_complex_(MRE11-RAD50-NBN_complex)::MRN_complex_(MRE11-RAD50-NBS1_complex)::RAD50-MRE11-NBN-p2…	0.0741	27	MutSalpha complex binding: 1.619e-06	mismatched DNA binding: 2.838e-06	single-stranded DNA binding: 2.883e-05	single base insertion or deletion binding: 9.696e-05	ATPase activity: 0.000112	guanine/thymine mispair binding: 0.001018	endonuclease activity: 0.006572	ATP binding: 0.0148
1897	2	P04406, Q9NTK5,	2.6667	0.4714					-2.6667	9.79818	0.0102562	GAIT_complex	0.125	4				peptidyl-cysteine S-nitrosylase activity: 9.696e-05	glyceraldehyde-3-phosphate dehydrogenase (NAD+) (phosphorylating) activity: 0.0001939	NAD binding: 0.006716	NADP binding: 0.006957	microtubule binding: 0.02536	hydrolase activity: 0.02899	GTP binding: 0.05351	identical protein binding: 0.06927
491	4	Q15436, P53992, O95487, O95486,	2.6667	0.4714	Q15436, P53992, O95487, O95486,	1	0	0	-2.6667	9.79818	0.0102562							zinc ion binding: 5.675e-05	molecular_function: 0.006059	transporter activity: 0.05851
1058	2	Q13596, Q9UNH7,	97	1.633	Q13596, Q9UNH7,	1	106	0	9	9.5459	0.0107966	Retromer_complex_(SNX1,_SNX2,_VPS35,_VPS29,_VPS26A)::VPS35-VPS29-VPS26A_complex::Retromer_complex_(SNX1,_SNX2,_VPS35,_VPS29,_VPS26B)	0.0833	6	Retromer_complex_(SNX1,_SNX2,_VPS35,_VPS29,_VPS26A)::VPS35-VPS29-VPS26A_complex::Retromer_complex_(SNX1,_SNX2,_VPS35,_VPS29,_VPS26B)	0.0833	6	phosphatidylinositol binding: 3.746e-05	protein transporter activity: 0.01176	protein homodimerization activity: 0.08226
1754	2	P26639, O14965,	43.3333	7.9303					-43.3333	9.46439	0.0109803	Tacc1-chTOG-AuroraA__complex	0.1667	3				threonine-tRNA ligase activity: 0.00063	protein serine/threonine/tyrosine kinase activity: 0.003484	ATP binding: 0.0148	ubiquitin protein ligase binding: 0.0256	protein kinase binding: 0.04735	protein kinase activity: 0.05461	protein serine/threonine kinase activity: 0.06063	protein homodimerization activity: 0.08226
1282	2	Q7Z478, O15111,	11.3333	1.2472	Q7Z478, O15111,	1	4.3333	0.4714	-7	9.0934	0.0118783	ESR1-RELA-BCL3-NCOA3_complex::IKK-alpha--ER-alpha-AIB1_complex	0.1	5	ESR1-RELA-BCL3-NCOA3_complex::IKK-alpha--ER-alpha-AIB1_complex	0.1	5	IkappaB kinase activity: 0.0003393	ribosomal small subunit binding: 0.001211	translation initiation factor activity: 0.01123	ATP-dependent helicase activity: 0.01262	ATP binding: 0.0148	protein heterodimerization activity: 0.04915	protein kinase activity: 0.05461	protein homodimerization activity: 0.08226
1902	2	P52597, Q13724,	3.3333	1.2472	P52597, Q13724,	1	13	1.4142	9.6667	8.87954	0.0124466	(E.F.G)_complex::12S_U11_snRNP::6S_methyltransferase_and_RG-containing_Sm_proteins_complex::20S_methylosome-SmD_complex::20S_methylosome_and_RG-containing_Sm_protein_complex::6S_methyltransferase_complex::JBP1-pICln_complex::SMN_complex,_U7_snRNA_specific::20S_methyltransferase_complex::AR_coactivator_complex::17S_U2_snRNP::SF3A1-SF3A2-SF3A3_complex::SF3b_complex::Exon_junction_complex::SRm160/30…	0.002	245	(E.F.G)_complex::12S_U11_snRNP::6S_methyltransferase_and_RG-containing_Sm_proteins_complex::20S_methylosome-SmD_complex::20S_methylosome_and_RG-containing_Sm_protein_complex::6S_methyltransferase_complex::JBP1-pICln_complex::SMN_complex,_U7_snRNA_specific::20S_methyltransferase_complex::AR_coactivator_complex::17S_U2_snRNP::SF3A1-SF3A2-SF3A3_complex::SF3b_complex::Exon_junction_complex::SRm160/30…	0.002	245	glucosidase activity: 0.0002424	mannosyl-oligosaccharide glucosidase activity: 0.0002424	single-stranded RNA binding: 0.004354	nucleotide binding: 0.05475	RNA binding: 0.09431
966	2	A1L0T0, Q07955,	25	4.899	A1L0T0, Q07955,	1	0	0	-25	8.8388	0.0125595	(E.F.G)_complex::12S_U11_snRNP::6S_methyltransferase_and_RG-containing_Sm_proteins_complex::20S_methylosome-SmD_complex::20S_methylosome_and_RG-containing_Sm_protein_complex::6S_methyltransferase_complex::JBP1-pICln_complex::SMN_complex,_U7_snRNA_specific::20S_methyltransferase_complex::AR_coactivator_complex::17S_U2_snRNP::SF3A1-SF3A2-SF3A3_complex::SF3b_complex::Exon_junction_complex::SRm160/30…	0.002	245	(E.F.G)_complex::12S_U11_snRNP::6S_methyltransferase_and_RG-containing_Sm_proteins_complex::20S_methylosome-SmD_complex::20S_methylosome_and_RG-containing_Sm_protein_complex::6S_methyltransferase_complex::JBP1-pICln_complex::SMN_complex,_U7_snRNA_specific::20S_methyltransferase_complex::AR_coactivator_complex::17S_U2_snRNP::SF3A1-SF3A2-SF3A3_complex::SF3b_complex::Exon_junction_complex::SRm160/30…	0.002	245	RS domain binding: 0.001066	thiamine pyrophosphate binding: 0.00126	transferase activity: 0.01195	magnesium ion binding: 0.03026	catalytic activity: 0.04231	nucleotide binding: 0.05475	molecular_function: 0.06358	RNA binding: 0.09431
143	31	O00487, P51665, O00232, P28066, P28062, O14818, P20618, Q15008, P35998, P25786, P25787, P25788, P25789, P17980, P08670, P28074, P55036, P28070, P28072, Q13200, O43242, Q99436, Q99460, P49720, P49721, P62333, P62195, P60900, P62191, O00231, P43686,	14.6667	3.3993	O00487, P51665, O00232, P28066, BORTEZOMIB, P28062, O14818, P20618, Q15008, P35998, P25786, P25787, P25788, P25789, P17980, P08670, P28074, P55036, P28070, P28072, Q13200, O43242, Q99436, Q99460, P49720, P49721, P62333, P62195, P60900, P62191, O00231, P43686,	0.9688	37	2.9439	22.3333	8.60209	0.0132463	20S_proteasome::26S_proteasome::PA700-20S-PA28_complex::PA28-20S_proteasome::PA700_complex::PA28gamma-20S_proteasome::Ubiquilin-proteasome_complex	0.6782	40	20S_proteasome::26S_proteasome::PA700-20S-PA28_complex::PA28-20S_proteasome::PA700_complex::PA28gamma-20S_proteasome::Ubiquilin-proteasome_complex	0.657	40	threonine-type endopeptidase activity: 1.282e-34	ATPase activity: 2.917e-08	nucleoside-triphosphatase activity: 1.193e-07	endopeptidase activity: 3.76e-06	enzyme regulator activity: 6.86e-06	protein binding: 6.236e-05	lipopolysaccharide binding: 0.0005483	thyrotropin-releasing hormone receptor binding: 0.005237	purine ribonucleoside triphosphate binding: 0.007465	endopeptidase activator activity: 0.01189	peptidase activity: 0.01345	proteasome binding: 0.01773	structural constituent of eye lens: 0.02494	TBP-class protein binding: 0.03835	metal ion binding: 0.04878	NF-kappaB binding: 0.05542	scaffold protein binding: 0.06141	identical protein binding: 0.07479	ATP binding: 0.09326	protein binding bridging: 0.09871
378	9	Q9Y3B7, P49406, Q7Z2W9, Q9P015, Q9BYC8, Q96A35, Q9BRJ2, Q9BYD2, Q9BYD1,	0	0	Q9Y3B7, P49406, Q7Z2W9, Q9P015, Q9BYC8, Q96A35, Q9BRJ2, Q9BYD2, Q9BYD1,	1	2.3333	0.4714	2.3333	8.57317	0.0133341							structural constituent of ribosome: 5.646e-18
765	2	P18887, Q9UNS1,	14.6667	2.8674	P18887, Q9UNS1,	1	0.3333	0.4714	-14.3334	8.5434	0.0134253	DNA_ligase_III-XRCC1-PNK-DNA-pol_III_multiprotein_complex::DNA_repair_complex_NEIL1-PNK-Pol(beta)-LigIII(alpha)-XRCC1::DNA_repair_complex_NEIL2-PNK-Pol(beta)-LigIII(alpha)-XRCC1::XRCC1-LIG3-PNK-TDP1_complex	0.0625	8	DNA_ligase_III-XRCC1-PNK-DNA-pol_III_multiprotein_complex::DNA_repair_complex_NEIL1-PNK-Pol(beta)-LigIII(alpha)-XRCC1::DNA_repair_complex_NEIL2-PNK-Pol(beta)-LigIII(alpha)-XRCC1::XRCC1-LIG3-PNK-TDP1_complex	0.0625	8	damaged DNA binding: 0.01209	protein heterodimerization activity: 0.04915	protein homodimerization activity: 0.08226
888	2	P0C7P4, O75844,	27	4.3205	P0C7P4, O75844,	1	5.3333	0.9428	-21.6667	8.48629	0.0136029							ubiquinol-cytochrome-c reductase activity: 0.0003878	metalloexopeptidase activity: 0.001841	2 iron 2 sulfur cluster binding: 0.002421	metalloendopeptidase activity: 0.013	metal ion binding: 0.01922
239	4	P30154, P30153, P67775, P63151,	42.3333	1.2472	P30154, P30153, P67775, P63151,	1	53.3333	1.8856	11	8.42754	0.0137893	PPP2CA-PPP2R1A-PPP2R3A_complex::PPP2R1A-PPP2R1B-PPP2CA-PPME1-EIF4A1_complex	0.375	6	PPP2CA-PPP2R1A-PPP2R3A_complex::PPP2R1A-PPP2R1B-PPP2CA-PPME1-EIF4A1_complex	0.375	6	protein serine/threonine phosphatase activity: 1.219e-07	protein phosphatase type 2A regulator activity: 1.508e-05	phosphoprotein phosphatase activity: 0.0101	antigen binding: 0.01968	protein binding: 0.03228	protein dimerization activity: 0.04131	protein C-terminus binding: 0.0555	protein heterodimerization activity: 0.09341
959	2	P11586, Q9NSE4,	6.3333	0.4714	P11586, Q9NSE4,	1	19.3333	2.8674	13	7.74863	0.0162504							methylenetetrahydrofolate dehydrogenase [NAD(P)+] activity: 0.0001939	isoleucine-tRNA ligase activity: 0.0003393	methenyltetrahydrofolate cyclohydrolase activity: 0.001018	methylenetetrahydrofolate dehydrogenase (NADP+) activity: 0.001018	formate-tetrahydrofolate ligase activity: 0.001066	aminoacyl-tRNA editing activity: 0.001211	ATP binding: 0.0148
587	2	Q9BS18, Q9UJX2,	32.6667	4.1899	Q9BS18, Q9UJX2,	1	12.6667	1.6997	-20	7.66135	0.0166135	Anaphase-promoting_complex::Cell_division_cycle_complex_(CDC27,_CDC16,_ANAPC7)	0.0556	9	Anaphase-promoting_complex::Cell_division_cycle_complex_(CDC27,_CDC16,_ANAPC7)	0.0556	9	ubiquitin-protein ligase activity: 0.035
781	2	Q8TED0, Q969X6,	28.6667	1.8856	Q8TED0, Q969X6,	1	43.3333	2.8674	14.6666	7.40226	0.0177655							molecular_function: 0.06358
948	2	P49591, O43716,	4	1.4142	P49591, O43716,	1	16	2.4495	12	7.34846	0.0180195							glutaminyl-tRNA synthase (glutamine-hydrolyzing) activity: 0.0005331	serine-tRNA ligase activity: 0.0005816	ATP binding: 0.0148	RNA binding: 0.09431
1330	2	Q13724, Q9NZ01,	15	3.559					-15	7.30002	0.018253							glucosidase activity: 0.0002424	mannosyl-oligosaccharide glucosidase activity: 0.0002424	oxidoreductase activity acting on the CH-CH group of donors: 0.00305
1852	9	P49821, O75251, P19404, O75380, O43181, P28331, O75306, O75489, O00217,	16.6667	3.8586	P03915, P49821, O75251, P19404, O75380, O43181, P28331, O75306, O75489, O00217,	0.9	0.3333	0.4714	-16.3334	7.27764	0.0183623	Respiratory_chain_complex_I_(beta_subunit)_mitochondrial::Respiratory_chain_complex_I_(gamma_subunit)_mitochondrial::Respiratory_chain_complex_I_(holoenzyme),_mitochondrial::Respiratory_chain_complex_I_(incomplete_intermediate),_mitochondrial::Respiratory_chain_complex_I_(intermediate_I/200kD_and_III/250kD),_mitochondrial::Respiratory_chain_complex_I_(intermediate_II/230kD),_mitochondrial::Respir…	0.1957	46	Respiratory_chain_complex_I_(beta_subunit)_mitochondrial::Respiratory_chain_complex_I_(gamma_subunit)_mitochondrial::Respiratory_chain_complex_I_(holoenzyme),_mitochondrial::Respiratory_chain_complex_I_(incomplete_intermediate),_mitochondrial::Respiratory_chain_complex_I_(intermediate_I/200kD_and_III/250kD),_mitochondrial::Respiratory_chain_complex_I_(intermediate_II/230kD),_mitochondrial::Respir…	0.2174	46	NADH dehydrogenase (ubiquinone) activity: 6.801e-24	NADH dehydrogenase activity: 5.049e-12	4 iron 4 sulfur cluster binding: 4.842e-11	oxidoreductase activity acting on NAD(P)H: 1.853e-10	electron carrier activity: 1.199e-09	quinone binding: 1.71e-05	2 iron 2 sulfur cluster binding: 5.14e-05	iron-sulfur cluster binding: 0.0001039	metal ion binding: 0.0003807	NAD binding: 0.0003964	oxidoreductase activity acting on NAD(P)H quinone or similar compound as acceptor: 0.006292	FMN binding: 0.01166	protease binding: 0.04499
782	2	Q969X6, Q9NZM5,	20.3333	2.0548	Q969X6, Q9NZM5,	1	10.3333	1.2472	-10	7.20581	0.0187199							molecular_function: 0.00108
610	2	Q14974, O60684,	122	4.2426	Q14974, O60684,	1	98.3333	3.8586	-23.6667	7.14787	0.019016	RANBP1-RAN-KPNB1_complex	0.1667	3	RANBP1-RAN-KPNB1_complex	0.1667	3	protein transporter activity: 3.484e-05	nuclear localization sequence binding: 0.001502	Ran GTPase binding: 0.005029	protein domain specific binding: 0.0281
154	6	P24928, O15514, P19388, P36954, P30876, P19387,	74	2.8284	P24928, O15514, P19388, P36954, P30876, P19387,	1	62	0.8165	-12	7.06024	0.0194772	Actin-ribonucleoprotein_complex_(POLR2A,_GTF2F1,_HNRNPU)::BRCA1-RNA_polymerase_II_complex::BRCA1-core_RNA_polymerase_II_complex::RNA_polymerase_II_core_complex::RNA_polymerase_II_holoenzyme_complex::TFIIH_transcription_factor_core_complex::RNA_polymerase_II_(RNAPII)::RPAP1-RPB2-RPB3_complex::BRCA1-BARD1-POLR2A_complex::BRCA1-BARD1-BRCA2-DNA_damage_complex_III::Pre-initiation_complex_(PIC)::CAK-ER…	0.1538	39	Actin-ribonucleoprotein_complex_(POLR2A,_GTF2F1,_HNRNPU)::BRCA1-RNA_polymerase_II_complex::BRCA1-core_RNA_polymerase_II_complex::RNA_polymerase_II_core_complex::RNA_polymerase_II_holoenzyme_complex::TFIIH_transcription_factor_core_complex::RNA_polymerase_II_(RNAPII)::RPAP1-RPB2-RPB3_complex::BRCA1-BARD1-POLR2A_complex::BRCA1-BARD1-BRCA2-DNA_damage_complex_III::Pre-initiation_complex_(PIC)::CAK-ER…	0.1538	39	DNA-directed RNA polymerase activity: 7.704e-13	RNA polymerase II activity: 5.079e-12	DNA binding: 0.0001527	RNA-directed RNA polymerase activity: 0.0002908	ribonucleoside binding: 0.002902	RNA polymerase III activity: 0.004059	RNA polymerase I activity: 0.005358	protein dimerization activity: 0.06066	ubiquitin protein ligase binding: 0.0729
1153	2	P63241, P06576,	20.3333	4.9889					-20.3333	7.05933	0.0194821	F1F0-ATP_synthase_(EC_3.6.3.14),_mitochondrial	0.0312	16				U6 snRNA binding: 0.001308	proton-transporting ATP synthase activity rotational mechanism: 0.001647	MHC class I protein binding: 0.002324	proton-transporting ATPase activity rotational mechanism: 0.002421	translation elongation factor activity: 0.004016	ribosome binding: 0.004209	transmembrane transporter activity: 0.005415	protein N-terminus binding: 0.01506	ATPase activity: 0.02096	transporter activity: 0.03017	RNA binding: 0.09431
747	2	Q14919, Q01658,	89	0.8165	Q14919, Q01658,	1	108.333	4.714	19.3333	6.99936	0.0198075	RNA_polymerase_II_complex,_chromatin_structure_modifying::RNA_polymerase_II_complex,_incomplete_(CBP,_RPBI,_PCAF,_BAF47),_chromatin_structure_modifying::RNA_polymerase_II_complex_(CBP,_PCAF,_RPB1,_BAF47,_CYCC,_CDK8),_chromatin_structure_modifying::RNA_polymerase_II_complex_(RPB1,_RAP74,_CDK8,_CYCC,_SRB7,_BAF190,_BAF47),_chromatin_structure_modifying::RNA_polymerase_II_complex,_incomplete_(CDK8_co…	0.0192	26	RNA_polymerase_II_complex,_chromatin_structure_modifying::RNA_polymerase_II_complex,_incomplete_(CBP,_RPBI,_PCAF,_BAF47),_chromatin_structure_modifying::RNA_polymerase_II_complex_(CBP,_PCAF,_RPB1,_BAF47,_CYCC,_CDK8),_chromatin_structure_modifying::RNA_polymerase_II_complex_(RPB1,_RAP74,_CDK8,_CYCC,_SRB7,_BAF190,_BAF47),_chromatin_structure_modifying::RNA_polymerase_II_complex,_incomplete_(CDK8_co…	0.0192	26	transcription corepressor activity: 0.0001866	transcription factor binding: 0.0003784	protein heterodimerization activity: 0.0006349	sequence-specific DNA binding: 0.001136	TBP-class protein binding: 0.002566	DNA binding: 0.01533
1235	2	Q15398, O14965,	1.6667	0.4714	Q15398, O14965,	1	4.3333	0.4714	2.6666	6.9281	0.0202047	Tacc1-chTOG-AuroraA__complex	0.1667	3	Tacc1-chTOG-AuroraA__complex	0.1667	3	protein serine/threonine/tyrosine kinase activity: 0.003484	phosphoprotein phosphatase activity: 0.005077	ubiquitin protein ligase binding: 0.0256	protein kinase binding: 0.04735	protein kinase activity: 0.05461	protein serine/threonine kinase activity: 0.06063
1529	2	Q9NXG2, Q9BV44,	8.6667	1.6997	Q9NXG2, Q9BV44,	1	18	1.633	9.3333	6.85848	0.0206043							RNA binding: 0.002461	methyltransferase activity: 0.01515
89	54	P62851, P30050, P05386, P62854, P50914, P05388, P08865, P39019, P46782, P62424, P61513, P62913, P62280, Q02543, P62847, P62753, P62750, P52272, P62899, Q07020, P62081, P62266, P62241, P36578, P62244, P62263, Q71UM5, P62249, P62917, P62906, P39023, P83731, P46777, P23396, P55769, P46778, P61313, P84098, P35268, P15880, P61247, Q12906, Q00839, Q14498, P18124, P62829, P62701, P62888, P62277, P60866,…	15.3333	3.2998	P62851, P30050, P62854, P50914, P05388, P08865, P39019, P46782, P62424, P61513, P62913, P62280, Q02543, P62847, P62753, P62750, P52272, P62899, Q07020, P62081, P62266, P62241, P36578, P62244, P62263, Q71UM5, P62249, P62917, Q96L21, P62906, P39023, P83731, P46777, P23396, P55769, P46778, P61313, P84098, P35268, P15880, P61247, Q12906, Q00839, Q14498, P18124, P62829, P62701, P62888, P62277, P60866,…	0.9633	2	0.8165	-13.3333	6.7937	0.0209867	40S_ribosomal_subunit,_cytoplasmic::Nop56p-associated_pre-rRNA_complex::TRBP_containing_complex_(DICER,_RPL7A,_EIF6,_MOV10_and_subunits_of_the_60S_ribosomal_particle)::DICER1-NCOA6-AGO2_complex::RNA-induced_silencing_complex,_RISC::TRBP_containing_complex_(DICER,_TRBP,_AGO2,_RPL7A,_EIF6,_MOV10)::FIB-associated_protein_complex	0.3734	129	40S_ribosomal_subunit,_cytoplasmic::Nop56p-associated_pre-rRNA_complex::TRBP_containing_complex_(DICER,_RPL7A,_EIF6,_MOV10_and_subunits_of_the_60S_ribosomal_particle)::DICER1-NCOA6-AGO2_complex::RNA-induced_silencing_complex,_RISC::TRBP_containing_complex_(DICER,_TRBP,_AGO2,_RPL7A,_EIF6,_MOV10)::FIB-associated_protein_complex	0.3589	129	structural constituent of ribosome: 5.03e-89	RNA binding: 7.499e-41	rRNA binding: 3.507e-10	mRNA binding: 1.737e-06	fibroblast growth factor binding: 0.005048	ATP binding: 0.006756	laminin receptor activity: 0.007803	5S rRNA binding: 0.007803	metal ion binding: 0.01168	mRNA 5'-UTR binding: 0.01421	protein binding: 0.01643	translation regulator activity: 0.0218	snoRNA binding: 0.03783	translation initiation factor binding: 0.04025	protein kinase A binding: 0.04743	nucleotide binding: 0.04765	translation activator activity: 0.04861	DNA N-glycosylase activity: 0.05098	DNA-(apurinic or apyrimidinic site) lyase activity: 0.05799	nucleic acid binding: 0.06247	cysteine-type endopeptidase activator activity involved in apoptotic process: 0.06602	laminin binding: 0.06829	iron-sulfur cluster binding: 0.08493	NF-kappaB binding: 0.09247
1147	2	P39210, Q9NQ50,	1	0	P39210, Q9NQ50,	1	4.6667	0.9428	3.6667	6.73622	0.021335							molecular_function: 0.00108
734	2	O00442, Q7Z2W4,	2.6667	1.2472	O00442, Q7Z2W4,	1	19.6667	4.1899	17	6.73551	0.0213394							RNA-3'-phosphate cyclase activity: 0.0003393	RNA binding: 0.002461	NAD+ ADP-ribosyltransferase activity: 0.004305	catalytic activity: 0.04231
1047	2	Q7Z478, P13995,	57.3333	2.357	Q7Z478, P13995,	1	67	0.8165	9.6667	6.71227	0.0214827							methylenetetrahydrofolate dehydrogenase (NAD+) activity: 0.0003878	methenyltetrahydrofolate cyclohydrolase activity: 0.001018	methylenetetrahydrofolate dehydrogenase (NADP+) activity: 0.001018	formate-tetrahydrofolate ligase activity: 0.001066	ribosomal small subunit binding: 0.001211	phosphate ion binding: 0.002034	translation initiation factor activity: 0.01123	ATP-dependent helicase activity: 0.01262	hydrolase activity: 0.02899	magnesium ion binding: 0.03026
763	2	Q00688, Q9UKS6,	75.3333	7.0396	Q00688, Q9UKS6,	1	110.667	5.9067	35.3334	6.65976	0.0218117							calcium channel inhibitor activity: 0.0009691	FK506 binding: 0.002276	peptidyl-prolyl cis-trans isomerase activity: 0.006186	cytoskeletal protein binding: 0.01008	lipid binding: 0.01568	receptor activity: 0.02612
407	8	Q9H9Y6, P52434, Q9Y535, Q9BUI4, O95602, P19388, O15160, O14802,	42.3333	3.0912	Q9H9Y6, P52434, Q9Y535, Q9BUI4, O95602, P19388, O15160, O14802,	1	29	1.633	-13.3333	6.60577	0.0221579	NMI-POLR1B-RRN3_complex	0.0417	3	NMI-POLR1B-RRN3_complex	0.0417	3	DNA-directed RNA polymerase activity: 2.123e-21	RNA polymerase I activity: 2.446e-14	RNA polymerase III activity: 1.185e-11	DNA binding: 5.497e-08	ribonucleoside binding: 6.235e-06	RNA polymerase II activity: 1.729e-05	zinc ion binding: 0.02327	protein dimerization activity: 0.07917
1709	8	O95218, O43865, Q9Y6A5, O60232, P63146, P22234, Q99614, P15374,	4.6667	1.2472					-4.6667	6.48089	0.0229906	Chromatin_remodeling_complex_(TACC2,_TACC3,_PCAF)	0.0417	3				5-(carboxyamino)imidazole ribonucleotide mutase activity: 0.0005816	phosphoribosylaminoimidazole carboxylase activity: 0.0005816	phosphoribosylaminoimidazolesuccinocarboxamide synthase activity: 0.0005816	protein binding: 0.001041	adenosylhomocysteinase activity: 0.001549	acid-amino acid ligase activity: 0.02262	ubiquitin binding: 0.02891	identical protein binding: 0.029	peptidase activity: 0.04504	ubiquitin thiolesterase activity: 0.04718	cysteine-type peptidase activity: 0.05406	unfolded protein binding: 0.06016	ubiquitin protein ligase binding: 0.0947
1555	2	Q9UK32, O60828,	4.6667	1.2472					-4.6667	6.48089	0.0229906							magnesium ion binding: 0.03026	transcription coactivator activity: 0.03209	protein kinase activity: 0.05461	protein serine/threonine kinase activity: 0.06063
493	6	Q15545, Q8IZX4, O00268, Q9HBM6, P21675, P49848,	14	3.7417					-14	6.48067	0.0229921	DAB_complex::DA_complex::TFIID_subcomplex::Transcription_initiation_factor_complex_(TAF1,_TAF5,_TAF11,_TAF12,_TBP)::Transcription_initiation_factor_complex_(TAF5,_TAF6,_TAF9,_TAF11,_TBP)::TFIID-beta_complex::TFIID_complex::TFIID_complex,_B-cell_specific::TFIIA-TRF2_complex::GCN5-TRRAP_histone_acetyltransferase_complex::STAGA_core_complex_(SPT3-TAF9-GCN5_acetyltransferase_complex)::PCAF_complex::S…	0.119	35				histone acetyl-lysine binding: 2.149e-05	TBP-class protein binding: 2.417e-05	transcription coactivator activity: 8.23e-05	histone acetyltransferase activity: 0.0001123	protein heterodimerization activity: 0.000296	transcription regulatory region DNA binding: 0.002622	sequence-specific DNA binding transcription factor activity: 0.004441	transcription factor binding: 0.005248	vitamin D receptor binding: 0.005358	histone acetyltransferase binding: 0.006941	thyroid hormone receptor binding: 0.01138	protein serine/threonine kinase activity: 0.01293	DNA binding: 0.02553	p53 binding: 0.02562	protein binding: 0.04729	transcription corepressor activity: 0.07658
1568	2	P54886, Q12905,	8	2.1602	P54886, Q12905,	1	0	0	-8	6.41441	0.0234529	DNA-PK-Ku-eIF2-NF90-NF45_complex	0.0625	8	DNA-PK-Ku-eIF2-NF90-NF45_complex	0.0625	8	glutamate 5-kinase activity: 4.848e-05	glutamate-5-semialdehyde dehydrogenase activity: 4.848e-05	double-stranded RNA binding: 0.004788	transferase activity: 0.01195	ATP binding: 0.0148
1544	2	P48643, P26639,	167.333	5.4365	P48643, P26639,	1	136	6.532	-31.3333	6.38602	0.0236545	CCT_micro-complex	0.0625	8	CCT_micro-complex	0.0625	8	threonine-tRNA ligase activity: 0.00063	ATP binding: 0.0148	unfolded protein binding: 0.01578	protein homodimerization activity: 0.08226
1784	2	P13995, Q8IX18,	38	1.633	P13995, Q8IX18,	1	29.3333	1.6997	-8.6667	6.36863	0.0237793							methylenetetrahydrofolate dehydrogenase (NAD+) activity: 0.0003878	methenyltetrahydrofolate cyclohydrolase activity: 0.001018	methylenetetrahydrofolate dehydrogenase (NADP+) activity: 0.001018	formate-tetrahydrofolate ligase activity: 0.001066	phosphate ion binding: 0.002034	helicase activity: 0.01061	ATP-dependent helicase activity: 0.01262	hydrolase activity: 0.02899	magnesium ion binding: 0.03026
271	50	P62851, P18621, P62854, P62857, Q07020, P05388, P39019, P62910, P62424, P46776, P30050, P62913, Q02543, P50914, P62753, P62750, P62899, Q12906, P26373, P62266, P62241, P36578, P62244, P62263, Q71UM5, P62249, P62917, P63220, P62906, P39023, P83731, P46777, P23396, P61313, P46778, P62829, P35268, P15880, O00264, P61247, P08865, P18124, P84098, P62701, P62277, P60866, P32969, Q02878, Q8NHW5, P61513,	0	0	P62851, P18621, P62854, P62857, P05388, P39019, P62910, P62424, P46776, P30050, P62913, Q02543, P50914, P62753, P62750, P62899, Q12906, P26373, P62266, P62241, P36578, P62244, P62263, Q71UM5, P62249, P62917, P62277, P63220, P62906, P39023, P83731, P46777, P23396, P61313, P46778, P62829, P35268, P15880, O00264, P61247, P08865, P18124, P84098, P62701, Q07020, P60866, P32969, Q02878, Q8NHW5, P61513,	1	3	0.8165	3	6.36393	0.0238131	40S_ribosomal_subunit,_cytoplasmic::Nop56p-associated_pre-rRNA_complex::TRBP_containing_complex_(DICER,_RPL7A,_EIF6,_MOV10_and_subunits_of_the_60S_ribosomal_particle)::DICER1-NCOA6-AGO2_complex::RNA-induced_silencing_complex,_RISC::TRBP_containing_complex_(DICER,_TRBP,_AGO2,_RPL7A,_EIF6,_MOV10)::FIB-associated_protein_complex	0.3425	129	40S_ribosomal_subunit,_cytoplasmic::Nop56p-associated_pre-rRNA_complex::TRBP_containing_complex_(DICER,_RPL7A,_EIF6,_MOV10_and_subunits_of_the_60S_ribosomal_particle)::DICER1-NCOA6-AGO2_complex::RNA-induced_silencing_complex,_RISC::TRBP_containing_complex_(DICER,_TRBP,_AGO2,_RPL7A,_EIF6,_MOV10)::FIB-associated_protein_complex	0.3425	129	structural constituent of ribosome: 1.82e-90	RNA binding: 2.968e-31	rRNA binding: 1.921e-08	mRNA binding: 2.179e-05	fibroblast growth factor binding: 0.004355	laminin receptor activity: 0.007229	5S rRNA binding: 0.007229	mRNA 5'-UTR binding: 0.01317	metal ion binding: 0.01818	translation regulator activity: 0.02022	protein kinase A binding: 0.04407	protein binding: 0.04417	translation activator activity: 0.04518	DNA N-glycosylase activity: 0.04738	DNA-(apurinic or apyrimidinic site) lyase activity: 0.05393	cysteine-type endopeptidase activator activity involved in apoptotic process: 0.06145	laminin binding: 0.06357	DNA binding: 0.07451	iron-sulfur cluster binding: 0.07918	steroid binding: 0.08121	NF-kappaB binding: 0.08626	protein kinase binding: 0.08824	ribosome binding: 0.09519
1215	2	Q13243, Q9Y320,	0	0	Q13243, Q9Y320,	1	3	0.8165	3	6.36393	0.0238131	(E.F.G)_complex::12S_U11_snRNP::6S_methyltransferase_and_RG-containing_Sm_proteins_complex::20S_methylosome-SmD_complex::20S_methylosome_and_RG-containing_Sm_protein_complex::6S_methyltransferase_complex::JBP1-pICln_complex::SMN_complex,_U7_snRNA_specific::20S_methyltransferase_complex::AR_coactivator_complex::17S_U2_snRNP::SF3A1-SF3A2-SF3A3_complex::SF3b_complex::Exon_junction_complex::SRm160/30…	0.002	245	(E.F.G)_complex::12S_U11_snRNP::6S_methyltransferase_and_RG-containing_Sm_proteins_complex::20S_methylosome-SmD_complex::20S_methylosome_and_RG-containing_Sm_protein_complex::6S_methyltransferase_complex::JBP1-pICln_complex::SMN_complex,_U7_snRNA_specific::20S_methyltransferase_complex::AR_coactivator_complex::17S_U2_snRNP::SF3A1-SF3A2-SF3A3_complex::SF3b_complex::Exon_junction_complex::SRm160/30…	0.002	245	RS domain binding: 0.001066	nucleotide binding: 0.05475	molecular_function: 0.06358	RNA binding: 0.09431
1533	2	Q9H6Z4, O14965,	2	0.8165	Q9H6Z4, O14965,	1	12.6667	2.8674	10.6667	6.19687	0.0250659	Tacc1-chTOG-AuroraA__complex	0.1667	3	Tacc1-chTOG-AuroraA__complex	0.1667	3	protein serine/threonine/tyrosine kinase activity: 0.003484	R-SMAD binding: 0.003581	Ran GTPase binding: 0.005029	ubiquitin protein ligase binding: 0.0256	protein kinase binding: 0.04735	protein kinase activity: 0.05461	protein serine/threonine kinase activity: 0.06063
78	13	P31943, P31942, P26368, O60506, Q07955, P09651, O14979, P52597, O43390, P61978, P14866, P52272, Q13151,	0	0	P31943, P31942, P26368, O60506, Q07955, P09651, O14979, P52597, O43390, P61978, P14866, P52272, Q13151,	1	1.6667	0.4714	1.6667	6.12391	0.0256438	(E.F.G)_complex::12S_U11_snRNP::6S_methyltransferase_and_RG-containing_Sm_proteins_complex::20S_methylosome-SmD_complex::20S_methylosome_and_RG-containing_Sm_protein_complex::6S_methyltransferase_complex::JBP1-pICln_complex::SMN_complex,_U7_snRNA_specific::20S_methyltransferase_complex::AR_coactivator_complex::17S_U2_snRNP::SF3A1-SF3A2-SF3A3_complex::SF3b_complex::Exon_junction_complex::SRm160/30…	0.0314	245	(E.F.G)_complex::12S_U11_snRNP::6S_methyltransferase_and_RG-containing_Sm_proteins_complex::20S_methylosome-SmD_complex::20S_methylosome_and_RG-containing_Sm_protein_complex::6S_methyltransferase_complex::JBP1-pICln_complex::SMN_complex,_U7_snRNA_specific::20S_methyltransferase_complex::AR_coactivator_complex::17S_U2_snRNP::SF3A1-SF3A2-SF3A3_complex::SF3b_complex::Exon_junction_complex::SRm160/30…	0.0314	245	nucleotide binding: 2.981e-18	RNA binding: 1.066e-17	single-stranded DNA binding: 4.169e-05	poly(A) RNA binding: 0.0001153	nucleic acid binding: 0.0001877	single-stranded RNA binding: 0.0003586	poly(G) RNA binding: 0.001888	RS domain binding: 0.00689	protein binding: 0.01023	AU-rich element binding: 0.01185	C2H2 zinc finger domain binding: 0.01246	poly(U) RNA binding: 0.01461	RNA polymerase II core promoter proximal region sequence-specific DNA binding: 0.03975	RNA polymerase II core promoter proximal region sequence-specific DNA binding transcription factor activity involved in positive regulation of transcription: 0.07162	double-stranded DNA binding: 0.09082
724	2	P52272, Q02127,	0	0	P52272, Q02127,	1	1.6667	0.4714	1.6667	6.12391	0.0256438	40S_ribosomal_subunit,_cytoplasmic::Nop56p-associated_pre-rRNA_complex::TRBP_containing_complex_(DICER,_RPL7A,_EIF6,_MOV10_and_subunits_of_the_60S_ribosomal_particle)::DICER1-NCOA6-AGO2_complex::RNA-induced_silencing_complex,_RISC::TRBP_containing_complex_(DICER,_TRBP,_AGO2,_RPL7A,_EIF6,_MOV10)::FIB-associated_protein_complex	0.0039	129	40S_ribosomal_subunit,_cytoplasmic::Nop56p-associated_pre-rRNA_complex::TRBP_containing_complex_(DICER,_RPL7A,_EIF6,_MOV10_and_subunits_of_the_60S_ribosomal_particle)::DICER1-NCOA6-AGO2_complex::RNA-induced_silencing_complex,_RISC::TRBP_containing_complex_(DICER,_TRBP,_AGO2,_RPL7A,_EIF6,_MOV10)::FIB-associated_protein_complex	0.0039	129	dihydroorotate dehydrogenase activity: 0.0001939	dihydroorotate oxidase activity: 0.0002908	ubiquinone binding: 0.0007269	FMN binding: 0.002615	drug binding: 0.008111	protein domain specific binding: 0.0281	nucleotide binding: 0.05475	RNA binding: 0.09431
812	2	Q8WUX1, P10644,	0	0	Q8WUX1, P10644,	1	1.6667	0.4714	1.6667	6.12391	0.0256438							glycine transmembrane transporter activity: 0.001211	cAMP-dependent protein kinase inhibitor activity: 0.00155	protein kinase A catalytic subunit binding: 0.001599	cAMP-dependent protein kinase regulator activity: 0.002615	cAMP binding: 0.003436	ubiquitin protein ligase binding: 0.0256
1027	2	O00401, Q8TF74,	1.6667	0.4714					-1.6667	6.12391	0.0256438							actin binding: 0.000739	small GTPase regulator activity: 0.004981
1760	2	Q15599, P61081,	1.6667	0.4714	Q15599, P61081,	1	0	0	-1.6667	6.12391	0.0256438							ribosomal S6-glutamic acid ligase activity: 0.0001454	NEDD8 ligase activity: 0.0007754	acid-amino acid ligase activity: 0.005752	phosphatase binding: 0.005897	beta-catenin binding: 0.01219	protein C-terminus binding: 0.02857	ubiquitin-protein ligase activity: 0.035	receptor binding: 0.03901
1435	2	P48047, O75947,	151	3.559	P48047, O75947,	1	137.667	1.2472	-13.3333	6.12376	0.025645	F1F0-ATP_synthase_(EC_3.6.3.14),_mitochondrial	0.125	16	F1F0-ATP_synthase_(EC_3.6.3.14),_mitochondrial	0.125	16	transmembrane transporter activity: 7.305e-06	ATPase activity: 0.000112	proton-transporting ATP synthase activity rotational mechanism: 0.001647	hydrogen ion transmembrane transporter activity: 0.004595	drug binding: 0.008111	transporter activity: 0.03017
1741	4	P51571, P14923, P19022, Q9UMX5,	0	0	P51571, P14923, P19022, Q9UMX5,	1	3.3333	0.9428	3.3333	6.12372	0.0256453	CAS-SRC-FAK_complex::Polycystin-1_multiprotein_complex_(ACTN1,_CDH1,_SRC,_JUP,_VCL,_CTNNB1,_PXN,_BCAR1,_PKD1,_PTK2,_TLN1)::Polycystin-1-E-cadherin-beta-catenin_complex::Polycystin-1-E-cadherin-beta-catenin-Flotillin-2_complex::PXN-ITGB5-PTK2_complex	0.0192	13	CAS-SRC-FAK_complex::Polycystin-1_multiprotein_complex_(ACTN1,_CDH1,_SRC,_JUP,_VCL,_CTNNB1,_PXN,_BCAR1,_PKD1,_PTK2,_TLN1)::Polycystin-1-E-cadherin-beta-catenin_complex::Polycystin-1-E-cadherin-beta-catenin-Flotillin-2_complex::PXN-ITGB5-PTK2_complex	0.0192	13	alpha-catenin binding: 4.189e-06	protein phosphatase binding: 0.0001177	structural constituent of cell wall: 0.0007753	gamma-catenin binding: 0.007616	calcium ion binding: 0.0127	cadherin binding: 0.01306	beta-catenin binding: 0.02408	growth factor activity: 0.03003	heme binding: 0.034	structural molecule activity: 0.05568	transcription coactivator activity: 0.06212	protein kinase binding: 0.09017	phospholipid binding: 0.09572
1523	2	P07858, Q9UNN8,	14	0.8165	P07858, Q9UNN8,	1	10.6667	0.4714	-3.3333	6.12366	0.0256458							cysteine-type endopeptidase activity: 0.009937	peptidase activity: 0.01166	cysteine-type peptidase activity: 0.0141	receptor activity: 0.02612
1764	2	Q15543, O00268,	4.3333	1.2472					-4.3333	6.01788	0.0265195	DAB_complex::DA_complex::TFIID_subcomplex::Transcription_initiation_factor_complex_(TAF1,_TAF5,_TAF11,_TAF12,_TBP)::Transcription_initiation_factor_complex_(TAF5,_TAF6,_TAF9,_TAF11,_TBP)::TFIID-beta_complex::TFIID_complex::TFIID_complex,_B-cell_specific::TFIIA-TRF2_complex::GCN5-TRRAP_histone_acetyltransferase_complex::STAGA_core_complex_(SPT3-TAF9-GCN5_acetyltransferase_complex)::PCAF_complex::S…	0.0571	35				protein heterodimerization activity: 0.0006349	sequence-specific DNA binding transcription factor activity: 0.004193	DNA binding: 0.01533	protein C-terminus binding: 0.02857	transcription coactivator activity: 0.03209
760	2	Q12792, Q8TBC4,	2	0.8165	Q12792, Q8TBC4,	1	6	0.8165	4	5.99997	0.0266717							NEDD8 activating enzyme activity: 0.0003878	small protein activating enzyme activity: 0.001308	actin monomer binding: 0.002324	ligand-dependent nuclear receptor binding: 0.00305	phosphatidylinositol-4 5-bisphosphate binding: 0.005415	acid-amino acid ligase activity: 0.005752	ATP binding: 0.0148	protein tyrosine kinase activity: 0.01716	catalytic activity: 0.04231	protein heterodimerization activity: 0.04915	actin binding: 0.05292
1732	4	Q9P253, Q9H269, Q96AX1, P49754,	16	1.633	Q9P253, P49754, Q96AX1, Q9H269,	1	9.6667	0.9428	-6.3333	5.8175	0.0282996	Class_C_VPS/HOPS_complex::Class_C_Vps_complex_(VPS11,_VPS18,_VPS16)::Class_C_Vps_complex_(VPS11,_VPS18,_STX7)	0.1429	7	Class_C_VPS/HOPS_complex::Class_C_Vps_complex_(VPS11,_VPS18,_VPS16)::Class_C_Vps_complex_(VPS11,_VPS18,_STX7)	0.1429	7	actin filament binding: 0.0317	microtubule binding: 0.04944
1373	2	P20645, P11117,	20	0.8165	P20645, P11117,	1	28.3333	2.357	8.3333	5.7864	0.0285917							mannose transmembrane transporter activity: 0.0003878	acid phosphatase activity: 0.001986	mannose binding: 0.002276	transmembrane signaling receptor activity: 0.01343
799	2	Q99986, Q7Z2T5,	7.6667	2.6247	Q99986, Q7Z2T5,	1	19.6667	2.4944	12	5.74014	0.0290344							tRNA (guanine-N2-)-methyltransferase activity: 0.0003878	tRNA binding: 0.00474	transferase activity transferring phosphorus-containing groups: 0.01257	protein serine/threonine kinase activity: 0.06063
1727	54	P62851, P62854, P62857, P50914, P05388, P39019, P46782, P62424, P30050, P62913, P62280, P61513, P46777, P55769, P62753, P62750, P52272, P62899, Q07020, P46781, Q02543, P62266, P62241, P36578, P62244, P62263, P62249, P62917, Q96L21, P32969, P62906, P61353, P62847, P23396, P61313, P46778, P84098, P35268, P15880, P08708, P61247, P08865, P18124, P62829, P62701, P27635, P62888, P62277, P63220, P26373,…	24.3333	0.9428	P62851, P62854, P62857, P50914, P05388, P39019, P46782, P62424, P30050, P62913, P62280, P61513, P46777, P55769, P62753, P62750, P52272, P62899, Q07020, P46781, Q02543, P62266, P62241, P36578, P62244, P62263, P62249, P62917, Q96L21, P32969, P62906, P61353, P62847, P23396, P61313, P46778, P84098, P35268, P15880, P08708, P61247, P08865, P18124, P62829, P62701, P27635, P62888, P62277, P63220, P26373,…	1	18.3333	1.6997	-6	5.34674	0.0332455	40S_ribosomal_subunit,_cytoplasmic::Nop56p-associated_pre-rRNA_complex::TRBP_containing_complex_(DICER,_RPL7A,_EIF6,_MOV10_and_subunits_of_the_60S_ribosomal_particle)::DICER1-NCOA6-AGO2_complex::RNA-induced_silencing_complex,_RISC::TRBP_containing_complex_(DICER,_TRBP,_AGO2,_RPL7A,_EIF6,_MOV10)::FIB-associated_protein_complex	0.3734	129	40S_ribosomal_subunit,_cytoplasmic::Nop56p-associated_pre-rRNA_complex::TRBP_containing_complex_(DICER,_RPL7A,_EIF6,_MOV10_and_subunits_of_the_60S_ribosomal_particle)::DICER1-NCOA6-AGO2_complex::RNA-induced_silencing_complex,_RISC::TRBP_containing_complex_(DICER,_TRBP,_AGO2,_RPL7A,_EIF6,_MOV10)::FIB-associated_protein_complex	0.3734	129	structural constituent of ribosome: 3.148e-98	RNA binding: 4.075e-31	rRNA binding: 3.055e-14	mRNA binding: 1.737e-06	translation regulator activity: 0.0002244	fibroblast growth factor binding: 0.005048	laminin receptor activity: 0.007803	5S rRNA binding: 0.007803	metal ion binding: 0.01168	mRNA 5'-UTR binding: 0.01421	DNA binding: 0.02266	snoRNA binding: 0.03783	translation initiation factor binding: 0.04025	protein kinase A binding: 0.04743	DNA N-glycosylase activity: 0.05098	DNA-(apurinic or apyrimidinic site) lyase activity: 0.05799	laminin binding: 0.06829	protein binding: 0.07521	iron-sulfur cluster binding: 0.08493	NF-kappaB binding: 0.09247
354	31	O00487, O00231, O00232, P28066, P51665, O14818, P20618, Q15008, P35998, P25786, P25787, P25788, P25789, P17980, P55072, P28074, P55036, P28070, P28062, P28072, Q13200, O43242, Q99436, Q99460, P49720, P62191, P62333, P62195, P60900, P49721, P43686,	57.6667	2.6247	O00487, O00231, O00232, P28066, BORTEZOMIB, P51665, O14818, P20618, Q15008, P35998, P25786, P25787, P25788, P25789, P17980, P55072, P28074, P55036, P28070, P28062, P28072, Q13200, O43242, Q99436, Q99460, P49720, P62191, P62333, P62195, P60900, P49721, P43686,	0.9688	88.3333	9.7411	30.6666	5.26501	0.034233	20S_proteasome::26S_proteasome::PA700-20S-PA28_complex::PA28-20S_proteasome::PA700_complex::PA28gamma-20S_proteasome::Ubiquilin-proteasome_complex	0.6782	40	20S_proteasome::26S_proteasome::PA700-20S-PA28_complex::PA28-20S_proteasome::PA700_complex::PA28gamma-20S_proteasome::Ubiquilin-proteasome_complex	0.657	40	threonine-type endopeptidase activity: 1.282e-34	ATPase activity: 9.223e-10	nucleoside-triphosphatase activity: 1.193e-07	endopeptidase activity: 3.76e-06	enzyme regulator activity: 6.86e-06	protein binding: 6.236e-05	lipopolysaccharide binding: 0.0005483	thyrotropin-releasing hormone receptor binding: 0.005237	purine ribonucleoside triphosphate binding: 0.007465	endopeptidase activator activity: 0.01189	peptidase activity: 0.01345	proteasome binding: 0.01773	TBP-class protein binding: 0.03835	polyubiquitin binding: 0.04456	ATP binding: 0.04612	metal ion binding: 0.04878	NF-kappaB binding: 0.05542	protein binding bridging: 0.09871
1462	2	Q14108, Q15233,	8.6667	2.8674	Q14108, Q15233,	1	0	0	-8.6667	5.23511	0.0346049	TLE1_corepressor_complex_(MASH1_promoter-corepressor_complex)	0.05	10	TLE1_corepressor_complex_(MASH1_promoter-corepressor_complex)	0.05	10	receptor activity: 0.02612	enzyme binding: 0.0378	nucleotide binding: 0.05475	identical protein binding: 0.06927	RNA binding: 0.09431
1598	2	Q14202, O75717,	8.6667	1.6997	Q14202, O75717,	1	3	0.8165	-5.6667	5.20513	0.0349841	ATR-HDAC2-CHD4_complex::Anti-HDAC2_complex::BHC_complex::HDAC1-associated_core_complex_cI::NRD_complex_(Nucleosome_remodeling_and_deacetylation_complex)::XFIM_complex::anti-BHC110_complex::BHC110_complex::CoREST-HDAC_complex::MTA2_complex::Mi2/NuRD_complex::HDAC1-associated_protein_complex::MeCP1_complex::HDAC1-associated_core_complex_cII::HDAC2-asscociated_core_complex::BRAF53-BRCA2_complex::MTA…	0.0081	62	ATR-HDAC2-CHD4_complex::Anti-HDAC2_complex::BHC_complex::HDAC1-associated_core_complex_cI::NRD_complex_(Nucleosome_remodeling_and_deacetylation_complex)::XFIM_complex::anti-BHC110_complex::BHC110_complex::CoREST-HDAC_complex::MTA2_complex::Mi2/NuRD_complex::HDAC1-associated_protein_complex::MeCP1_complex::HDAC1-associated_core_complex_cII::HDAC2-asscociated_core_complex::BRAF53-BRCA2_complex::MTA…	0.0081	62	RNA polymerase binding: 0.0006785	DNA binding: 0.01533	chromatin binding: 0.05062	RNA binding: 0.09431
525	4	Q9P253, O75691, P49754, Q96AX1,	8.3333	1.2472	Q9P253, O75691, P49754, Q96AX1,	1	14.6667	1.6997	6.3334	5.20339	0.0350062	Class_C_VPS/HOPS_complex::Class_C_Vps_complex_(VPS11,_VPS18,_VPS16)::Class_C_Vps_complex_(VPS11,_VPS18,_STX7)	0.0357	7	Class_C_VPS/HOPS_complex::Class_C_Vps_complex_(VPS11,_VPS18,_VPS16)::Class_C_Vps_complex_(VPS11,_VPS18,_STX7)	0.0357	7	protein binding: 0.03228	microtubule binding: 0.04944
978	2	Q5VT66, O95168,	0.3333	0.4714	Q5VT66, O95168,	1	2.3333	0.4714	2	5.1962	0.0350981	Respiratory_chain_complex_I_(beta_subunit)_mitochondrial::Respiratory_chain_complex_I_(gamma_subunit)_mitochondrial::Respiratory_chain_complex_I_(holoenzyme),_mitochondrial::Respiratory_chain_complex_I_(incomplete_intermediate),_mitochondrial::Respiratory_chain_complex_I_(intermediate_I/200kD_and_III/250kD),_mitochondrial::Respiratory_chain_complex_I_(intermediate_II/230kD),_mitochondrial::Respir…	0.0109	46	Respiratory_chain_complex_I_(beta_subunit)_mitochondrial::Respiratory_chain_complex_I_(gamma_subunit)_mitochondrial::Respiratory_chain_complex_I_(holoenzyme),_mitochondrial::Respiratory_chain_complex_I_(incomplete_intermediate),_mitochondrial::Respiratory_chain_complex_I_(intermediate_I/200kD_and_III/250kD),_mitochondrial::Respiratory_chain_complex_I_(intermediate_II/230kD),_mitochondrial::Respir…	0.0109	46	nitrate reductase activity: 0.0001939	molybdenum ion binding: 0.0004362	molybdopterin cofactor binding: 0.00063	NADH dehydrogenase (ubiquinone) activity: 0.005511	pyridoxal phosphate binding: 0.009121	catalytic activity: 0.04231
1040	2	Q13564, Q8TBC4,	2.6667	0.4714	Q13564, Q8TBC4,	1	0.6667	0.4714	-2	5.1962	0.0350981							NEDD8 activating enzyme activity: 3.29e-08	catalytic activity: 0.000467	protein heterodimerization activity: 0.0006349	small protein activating enzyme activity: 0.001308	ligand-dependent nuclear receptor binding: 0.00305	acid-amino acid ligase activity: 0.005752	ubiquitin protein ligase binding: 0.0256
713	2	P04075, P09382,	190	5.3541	P04075, P09382,	1	217.333	7.5865	27.3333	5.09853	0.0363825	Anti-SMN_protein_complex::Anti-Sm_protein_complex::SMN1-SIP1-SNRP_complex::SMN_complex::SMN_complex_(GEMIN2,5,_SMN)::SMN_complex_(GEMIN5,2,3,4,_SMN)::SMN_complex_(GEMIN5,4,3),_SMN-independent_intermediate::SMN_complex_(GEMIN6,7,_UNRIP),_SMN-independent_intermediate::SMN_containing_complex::PPP4C-PPP4R2-Gemin3-Gemin4_complex::SMN-PolII-RHA_complex	0.0172	29	Anti-SMN_protein_complex::Anti-Sm_protein_complex::SMN1-SIP1-SNRP_complex::SMN_complex::SMN_complex_(GEMIN2,5,_SMN)::SMN_complex_(GEMIN5,2,3,4,_SMN)::SMN_complex_(GEMIN5,4,3),_SMN-independent_intermediate::SMN_complex_(GEMIN6,7,_UNRIP),_SMN-independent_intermediate::SMN_containing_complex::PPP4C-PPP4R2-Gemin3-Gemin4_complex::SMN-PolII-RHA_complex	0.0172	29	lactose binding: 0.0001939	galactoside binding: 0.0005331	fructose-bisphosphate aldolase activity: 0.0008723	fructose binding: 0.001308	laminin binding: 0.002711	glycoprotein binding: 0.005608	tubulin binding: 0.006957	cytoskeletal protein binding: 0.01008	signal transducer activity: 0.03654	actin binding: 0.05292	identical protein binding: 0.06927	protein homodimerization activity: 0.08226
1210	2	P51571, Q9UMX5,	7.3333	2.4944					-7.3333	5.09207	0.0364699							growth factor activity: 0.01525	heme binding: 0.0173	calcium ion binding: 0.09204
590	2	Q00341, O95801,	68.3333	0.4714	Q00341, O95801,	1	62.6667	1.8856	-5.6666	5.04974	0.0370501	DHX9-ADAR-vigilin-DNA-PK-Ku_antigen_complex::DNA-PK-Ku_antigen_complex::DNA-PK-Ku_complex::Vigilin-DNA-PK-Ku_antigen_complex::MGC1-DNA-PKcs-Ku_complex::GammaH2AFX-NDHII-Ku70-DNA_complex::Ku70/Ku86/Werner_complex::WRN-Ku70-Ku80-PARP1_complex::NCOA6-DNA-PK-Ku-PARP1_complex	0.0455	11	DHX9-ADAR-vigilin-DNA-PK-Ku_antigen_complex::DNA-PK-Ku_antigen_complex::DNA-PK-Ku_complex::Vigilin-DNA-PK-Ku_antigen_complex::MGC1-DNA-PKcs-Ku_complex::GammaH2AFX-NDHII-Ku70-DNA_complex::Ku70/Ku86/Werner_complex::WRN-Ku70-Ku80-PARP1_complex::NCOA6-DNA-PK-Ku-PARP1_complex	0.0455	11	lipid binding: 0.01568	RNA binding: 0.09431
745	2	P78406, Q7Z2W4,	29.6667	4.1096	P78406, Q7Z2W4,	1	16.6667	1.8856	-13	4.97987	0.0380382							RNA binding: 0.002461	NAD+ ADP-ribosyltransferase activity: 0.004305	microtubule binding: 0.02536
591	2	P23193, Q9BSL1,	8.6667	0.9428	P23193, Q9BSL1,	1	5.6667	0.4714	-3	4.92955	0.0387738							translation elongation factor activity: 0.004016
993	2	P53634, P60033,	75.3333	1.2472	P53634, P60033,	1	70.3333	1.2472	-5	4.90998	0.0390657	GPR56-CD81-Galphaq/11-Gbeta_complex	0.0625	8	GPR56-CD81-Galphaq/11-Gbeta_complex	0.0625	8	MHC class II protein complex binding: 0.0005331	chloride ion binding: 0.0007754	protein self-association: 0.004305	cysteine-type peptidase activity: 0.0141	serine-type endopeptidase activity: 0.02006	identical protein binding: 0.06927
957	2	Q9BVC3, Q8WVB6,	19.3333	0.4714	Q9BVC3, Q8WVB6,	1	24.3333	1.6997	5	4.90983	0.0390678	CHL12-RFC2-5_complex::CTF18-RFC_subcomplex::CTF18-cohesion-RFC-POLH_complex::CTF18-CTF8-DCC1-RFC3_complex::CTF18-CTF8-DCC1_complex::CTF18-cohesion-RFC_complex::CTF8-CTF18-DCC1_subcomplex::PCNA-CHL12-RFC2-5_complex::PCNA-RFC2-5_complex	0.2222	9	CHL12-RFC2-5_complex::CTF18-RFC_subcomplex::CTF18-cohesion-RFC-POLH_complex::CTF18-CTF8-DCC1-RFC3_complex::CTF18-CTF8-DCC1_complex::CTF18-cohesion-RFC_complex::CTF8-CTF18-DCC1_subcomplex::PCNA-CHL12-RFC2-5_complex::PCNA-RFC2-5_complex	0.2222	9	nucleoside-triphosphatase activity: 0.007631	DNA binding: 0.01533
1763	2	Q9NRX5, Q9Y512,	2.6667	0.9428					-2.6667	4.89909	0.0392294							L-serine transmembrane transporter activity: 0.0005816
523	57	P62851, Q08211, P30050, P62854, P50914, P05388, P62979, Q8IXI1, P18621, Q12906, P62910, P62424, P61513, P62913, P62280, Q02543, P62847, P62753, P62750, P52272, P25398, P62899, P46782, P62266, P62241, P36578, P62244, P62263, P62249, P62917, P62277, P63220, P62906, P39023, P83731, P46777, P23396, P61313, P39019, P46778, P62829, P35268, P15880, P08708, P61247, P08865, P18124, P84098, P62701, P27635,…	1.3333	0.4714	P62851, P18621, P62854, P62857, P50914, P05388, P62979, Q8IXI1, Q12906, P62910, P62424, P61513, P62913, P62280, P30050, P62847, P62753, P62750, P52272, P25398, P62899, P46782, Q02543, P62266, P62241, P36578, P62244, P62263, Q71UM5, P62249, P62917, P62277, P32969, P62906, P39023, P83731, P46777, P23396, P61313, P39019, P46778, P62829, P35268, P15880, P08708, P61247, P08865, P18124, P84098, P62701,…	0.917	0	0	-1.3333	4.8989	0.0392322	40S_ribosomal_subunit,_cytoplasmic::Nop56p-associated_pre-rRNA_complex::TRBP_containing_complex_(DICER,_RPL7A,_EIF6,_MOV10_and_subunits_of_the_60S_ribosomal_particle)::DICER1-NCOA6-AGO2_complex::RNA-induced_silencing_complex,_RISC::TRBP_containing_complex_(DICER,_TRBP,_AGO2,_RPL7A,_EIF6,_MOV10)::FIB-associated_protein_complex	0.3966	129	40S_ribosomal_subunit,_cytoplasmic::Nop56p-associated_pre-rRNA_complex::TRBP_containing_complex_(DICER,_RPL7A,_EIF6,_MOV10_and_subunits_of_the_60S_ribosomal_particle)::DICER1-NCOA6-AGO2_complex::RNA-induced_silencing_complex,_RISC::TRBP_containing_complex_(DICER,_TRBP,_AGO2,_RPL7A,_EIF6,_MOV10)::FIB-associated_protein_complex	0.4052	129	structural constituent of ribosome: 9.324e-98	RNA binding: 1.955e-31	rRNA binding: 4.906e-10	mRNA binding: 2.393e-06	ATP binding: 0.00483	fibroblast growth factor binding: 0.005597	laminin receptor activity: 0.008234	5S rRNA binding: 0.008234	metal ion binding: 0.008324	mRNA 5'-UTR binding: 0.01499	translation regulator activity: 0.02298	RNA helicase activity: 0.03729	translation initiation factor binding: 0.04239	protein kinase A binding: 0.04993	DNA N-glycosylase activity: 0.05365	DNA-(apurinic or apyrimidinic site) lyase activity: 0.061	laminin binding: 0.0718	DNA binding: 0.08414	iron-sulfur cluster binding: 0.08919	protein binding: 0.09366	NF-kappaB binding: 0.09706
1710	4	P36542, P21281, P25705, P06576,	0	0	P36542, P21281, P25705, P06576,	1	1.3333	0.4714	1.3333	4.8989	0.0392322	F1F0-ATP_synthase_(EC_3.6.3.14),_mitochondrial	0.1406	16	F1F0-ATP_synthase_(EC_3.6.3.14),_mitochondrial	0.1406	16	proton-transporting ATPase activity rotational mechanism: 1.908e-12	proton-transporting ATP synthase activity rotational mechanism: 2.044e-09	transmembrane transporter activity: 7.77e-08	ATPase activity: 4.672e-06	MHC class I protein binding: 7.936e-06	hydrolase activity acting on acid anhydrides catalyzing transmembrane movement of substances: 0.001259	ATP binding: 0.006327	hydrogen ion transmembrane transporter activity: 0.009148	transporter activity: 0.05851
953	2	P05787, O75886,	0	0	P05787, O75886,	1	1.3333	0.4714	1.3333	4.8989	0.0392322	RIN1-STAM2-EGFR_complex,_EGF_stimulated::RIN1-STAM2-HRS_complex	0.125	4	RIN1-STAM2-EGFR_complex,_EGF_stimulated::RIN1-STAM2-HRS_complex	0.125	4	scaffold protein binding: 0.004209	protein complex binding: 0.02053	structural molecule activity: 0.02867
1348	2	Q15843, Q8NH73,	0	0	Q15843, Q8NH73,	1	1.3333	0.4714	1.3333	4.8989	0.0392322	Heterotrimeric_SKP1-CUL1-ROC1_complex::Neddylin_ligase_(FBXO11,_SKP1,_CUL1,_RBX1)::Ubiquitin_E3_ligase_(CUL1,_RBX1,_SKP1A)::Ubiquitin_E3_ligase_(CDC34,_NEDD8,_BTRC,_CUL1,_SKP1A,_RBX1)::Ubiquitin_E3_ligase_(SMAD3,_BTRC,_CUL1,_SKP1A,_RBX1)::Ubiquitin_E3_ligase_(FBXO18,_SKP1A,_CUL1,_RBX1)::Ubiquitin_E3_ligase_(FBXO31,_SKP1A,_CUL1,_RBX1)::Ubiquitin_E3_ligase_(FBXW11,_SKP1A,_CUL1,_RBX1)::Ubiquitin_E3_…	0.0385	13	Heterotrimeric_SKP1-CUL1-ROC1_complex::Neddylin_ligase_(FBXO11,_SKP1,_CUL1,_RBX1)::Ubiquitin_E3_ligase_(CUL1,_RBX1,_SKP1A)::Ubiquitin_E3_ligase_(CDC34,_NEDD8,_BTRC,_CUL1,_SKP1A,_RBX1)::Ubiquitin_E3_ligase_(SMAD3,_BTRC,_CUL1,_SKP1A,_RBX1)::Ubiquitin_E3_ligase_(FBXO18,_SKP1A,_CUL1,_RBX1)::Ubiquitin_E3_ligase_(FBXO31,_SKP1A,_CUL1,_RBX1)::Ubiquitin_E3_ligase_(FBXW11,_SKP1A,_CUL1,_RBX1)::Ubiquitin_E3_…	0.0385	13	olfactory receptor activity: 0.02091	ubiquitin protein ligase binding: 0.0256	G-protein coupled receptor activity: 0.04143
1617	2	P14866, Q93052,	0	0	P14866, Q93052,	1	1.3333	0.4714	1.3333	4.8989	0.0392322	Emerin_complex_52	0.0217	23	Emerin_complex_52	0.0217	23	transcription regulatory region DNA binding: 0.02683	nucleotide binding: 0.05475	RNA binding: 0.09431
1561	2	Q14687, P35637,	1.3333	0.4714	Q14687, P35637,	1	0	0	-1.3333	4.8989	0.0392322	ATR-HDAC2-CHD4_complex::Anti-HDAC2_complex::BHC_complex::HDAC1-associated_core_complex_cI::NRD_complex_(Nucleosome_remodeling_and_deacetylation_complex)::XFIM_complex::anti-BHC110_complex::BHC110_complex::CoREST-HDAC_complex::MTA2_complex::Mi2/NuRD_complex::HDAC1-associated_protein_complex::MeCP1_complex::HDAC1-associated_core_complex_cII::HDAC2-asscociated_core_complex::BRAF53-BRCA2_complex::MTA…	0.0081	62	ATR-HDAC2-CHD4_complex::Anti-HDAC2_complex::BHC_complex::HDAC1-associated_core_complex_cI::NRD_complex_(Nucleosome_remodeling_and_deacetylation_complex)::XFIM_complex::anti-BHC110_complex::BHC110_complex::CoREST-HDAC_complex::MTA2_complex::Mi2/NuRD_complex::HDAC1-associated_protein_complex::MeCP1_complex::HDAC1-associated_core_complex_cII::HDAC2-asscociated_core_complex::BRAF53-BRCA2_complex::MTA…	0.0081	62	nucleotide binding: 0.05475	identical protein binding: 0.06927	RNA binding: 0.09431
528	6	P21281, Q9UI12, P36543, Q13488, Q16864, Q9Y5K8,	0	0	P21281, Q9UI12, P36543, Q13488, Q16864, Q9Y5K8,	1	1.3333	0.4714	1.3333	4.8989	0.0392322							proton-transporting ATPase activity rotational mechanism: 2.856e-11	hydrogen ion transmembrane transporter activity: 2.35e-07	ATPase activity uncoupled: 0.0001454	hydrolase activity acting on acid anhydrides catalyzing transmembrane movement of substances: 0.001888	hydrogen-exporting ATPase activity phosphorylative mechanism: 0.002612	enzyme regulator activity: 0.007085	ATPase binding: 0.01152	ATPase activity coupled to transmembrane movement of substances: 0.01536	ATPase activity: 0.06027	transporter activity: 0.0851
722	2	P09622, P22695,	0.6667	0.4714	P09622, P22695,	1	2	0	1.3333	4.8989	0.0392322							dihydrolipoyl dehydrogenase activity: 0.0002908	oxidoreductase activity acting on a sulfur group of donors NAD(P) as acceptor: 0.0004847	metalloendopeptidase activity: 0.013	flavin adenine dinucleotide binding: 0.0132	protein complex binding: 0.02053
1424	2	O75937, P62834,	18.3333	1.8856	O75937, P62834,	1	24.6667	1.2472	6.3334	4.85227	0.0399452	ITGB1-RAP1A-PKD1_complex	0.1667	3	ITGB1-RAP1A-PKD1_complex	0.1667	3	Rap guanyl-nucleotide exchange factor activity: 0.00126	Ras GTPase binding: 0.003436	protein transporter activity: 0.01176	protein complex binding: 0.02053	GTPase activity: 0.03547	GTP binding: 0.05351
168	51	P62851, Q08211, P50914, Q07020, P05388, P46782, P62424, P30050, P62913, P52272, Q02543, P62854, P62753, P62750, P62899, Q12906, Q12905, P26373, P62266, P55769, P36578, P62244, P62263, Q71UM5, P62249, P62917, P62277, P62906, P39023, P83731, P46777, P23396, P61313, P46778, P62829, P35268, P15880, P61247, P08865, P18124, P84098, P62701, P27635, P19338, P62888, Q6NZI2, P60866, P32969, Q02878, P62081,…	21	1.633	P62851, Q08211, P50914, Q07020, P05388, P46782, P62424, P30050, P62913, P52272, Q02543, P62854, P62753, P62750, P62899, Q12906, Q12905, P26373, P62266, P55769, P36578, P62244, P62263, Q71UM5, P62249, P62917, P62277, P62906, P39023, P83731, P46777, P23396, P61313, P46778, P62829, P35268, P15880, P61247, P08865, P18124, P84098, P62701, P27635, P19338, P62888, Q6NZI2, P60866, P32969, Q02878, P62081,…	1	32.6667	3.8586	11.6667	4.82283	0.040405	40S_ribosomal_subunit,_cytoplasmic::Nop56p-associated_pre-rRNA_complex::TRBP_containing_complex_(DICER,_RPL7A,_EIF6,_MOV10_and_subunits_of_the_60S_ribosomal_particle)::DICER1-NCOA6-AGO2_complex::RNA-induced_silencing_complex,_RISC::TRBP_containing_complex_(DICER,_TRBP,_AGO2,_RPL7A,_EIF6,_MOV10)::FIB-associated_protein_complex	0.3649	129	40S_ribosomal_subunit,_cytoplasmic::Nop56p-associated_pre-rRNA_complex::TRBP_containing_complex_(DICER,_RPL7A,_EIF6,_MOV10_and_subunits_of_the_60S_ribosomal_particle)::DICER1-NCOA6-AGO2_complex::RNA-induced_silencing_complex,_RISC::TRBP_containing_complex_(DICER,_TRBP,_AGO2,_RPL7A,_EIF6,_MOV10)::FIB-associated_protein_complex	0.3649	129	structural constituent of ribosome: 1.061e-77	RNA binding: 8.318e-41	rRNA binding: 2.126e-08	mRNA binding: 1.236e-06	rRNA primary transcript binding: 0.001236	protein binding: 0.003488	double-stranded RNA binding: 0.006476	laminin receptor activity: 0.007372	5S rRNA binding: 0.007372	mRNA 5'-UTR binding: 0.01343	metal ion binding: 0.0163	translation regulator activity: 0.02061	ATP binding: 0.03267	RNA helicase activity: 0.0335	snoRNA binding: 0.0358	protein kinase A binding: 0.04491	translation activator activity: 0.04604	DNA N-glycosylase activity: 0.04828	telomeric DNA binding: 0.05274	DNA-(apurinic or apyrimidinic site) lyase activity: 0.05495	cysteine-type endopeptidase activator activity involved in apoptotic process: 0.0626	laminin binding: 0.06476	nucleic acid binding: 0.07478	iron-sulfur cluster binding: 0.08062	NF-kappaB binding: 0.08782	fibroblast growth factor binding: 0.09188	ATP-dependent RNA helicase activity: 0.09288	ribosome binding: 0.09689
752	2	Q9BXJ9, P41227,	32.6667	3.2998	Q9BXJ9, P41227,	1	53.3333	6.65	20.6666	4.82181	0.0404212	53BP1-containing_complex::Ku_antigen-NARG1_complex::Ku_antigen-YY1-alphaMyHC_promoter_complex::PCNA-KU_antigen_complex::KIN17-PCNA-RPA70_complex	0.0556	9	53BP1-containing_complex::Ku_antigen-NARG1_complex::Ku_antigen-YY1-alphaMyHC_promoter_complex::PCNA-KU_antigen_complex::KIN17-PCNA-RPA70_complex	0.0556	9	acetyltransferase activity: 2.973e-07	N-acetyltransferase activity: 2.677e-06	ribosome binding: 4.396e-06	peptide alpha-N-acetyltransferase activity: 0.0008723
1553	2	Q08209, P63098,	163.667	1.6997	Q08209, P63098,	1	155.333	2.4944	-8.3334	4.78189	0.0410577	PPP3CA-PPP3CA-RCAN1_complex	0.1667	3	PPP3CA-PPP3CA-RCAN1_complex	0.1667	3	calcium-dependent protein serine/threonine phosphatase activity: 1.069e-07	calmodulin binding: 0.0001598	calmodulin-dependent protein phosphatase activity: 0.0008723	calcium ion binding: 0.002337	phosphoprotein phosphatase activity: 0.005077	protein serine/threonine phosphatase activity: 0.006283	drug binding: 0.008111	protein dimerization activity: 0.0211	protein domain specific binding: 0.0281	enzyme binding: 0.0378	protein heterodimerization activity: 0.04915
784	2	P43243, Q9NZM1,	11.3333	1.6997	P43243, Q9NZM1,	1	4.3333	1.8856	-7	4.77601	0.0411527	(E.F.G)_complex::12S_U11_snRNP::6S_methyltransferase_and_RG-containing_Sm_proteins_complex::20S_methylosome-SmD_complex::20S_methylosome_and_RG-containing_Sm_protein_complex::6S_methyltransferase_complex::JBP1-pICln_complex::SMN_complex,_U7_snRNA_specific::20S_methyltransferase_complex::AR_coactivator_complex::17S_U2_snRNP::SF3A1-SF3A2-SF3A3_complex::SF3b_complex::Exon_junction_complex::SRm160/30…	0.002	245	(E.F.G)_complex::12S_U11_snRNP::6S_methyltransferase_and_RG-containing_Sm_proteins_complex::20S_methylosome-SmD_complex::20S_methylosome_and_RG-containing_Sm_protein_complex::6S_methyltransferase_complex::JBP1-pICln_complex::SMN_complex,_U7_snRNA_specific::20S_methyltransferase_complex::AR_coactivator_complex::17S_U2_snRNP::SF3A1-SF3A2-SF3A3_complex::SF3b_complex::Exon_junction_complex::SRm160/30…	0.002	245	structural molecule activity: 0.02867	phospholipid binding: 0.05044	nucleotide binding: 0.05475	RNA binding: 0.09431
120	6	Q99471, O60925, Q9NQP4, O15212, P61758, Q9UHV9,	411	3.559	Q99471, O60925, Q9NQP4, O15212, P61758, Q9UHV9,	1	389	7.2572	-22	4.71428	0.0421697	Prefoldin::Prefoldin_complex	1	6	Prefoldin::Prefoldin_complex	1	6	unfolded protein binding: 2.413e-13	chaperone binding: 0.0001528	transcription corepressor activity: 0.07658
1436	2	P16070, P08195,	47.6667	2.8674	P16070, P08195,	1	38.3333	1.8856	-9.3334	4.71058	0.0422319	CD98-LAT2-ITGB1_complex::ITAGV-ITGB3-F11R_complex::ITGA2B-ITGB3-F11R_complex::ITGA2B-ITGB3-ICAM4_complex::ITGA2b-ITGB3-TLN1_complex::ITGAV-ITGB3-ADAM15_complex::ITGAV-ITGB3-ADAM23_complex::ITGAV-ITGB3-COL4A3_complex::ITGAV-ITGB3-EGFR_complex::ITGAV-ITGB3-LAMA4_complex::ITGAV-ITGB3-NOV_complex::ITGAV-ITGB3-PPAP2b_complex::ITGAV-ITGB3-SLC3A2_complex::ITGAV-ITGB3-SPP1_complex::ITGAV-ITGB1-SPP1_compl…	0.0074	68	CD98-LAT2-ITGB1_complex::ITAGV-ITGB3-F11R_complex::ITGA2B-ITGB3-F11R_complex::ITGA2B-ITGB3-ICAM4_complex::ITGA2b-ITGB3-TLN1_complex::ITGAV-ITGB3-ADAM15_complex::ITGAV-ITGB3-ADAM23_complex::ITGAV-ITGB3-COL4A3_complex::ITGAV-ITGB3-EGFR_complex::ITGAV-ITGB3-LAMA4_complex::ITGAV-ITGB3-NOV_complex::ITGAV-ITGB3-PPAP2b_complex::ITGAV-ITGB3-SLC3A2_complex::ITGAV-ITGB3-SPP1_complex::ITGAV-ITGB1-SPP1_compl…	0.0074	68	cation binding: 0.001357	calcium:sodium antiporter activity: 0.001357	neutral amino acid transmembrane transporter activity: 0.00155	hyalurononglucosaminidase activity: 0.001647	hyaluronic acid binding: 0.003388	collagen binding: 0.008784	transmembrane signaling receptor activity: 0.01343	catalytic activity: 0.04231
1826	59	P62851, P30050, P62854, P62857, P50914, P05388, P62979, P39019, P18621, Q12906, P62424, P61513, P62913, P52272, Q02543, P62847, P62753, P62750, P62280, P25398, P62899, P46782, P62081, P62266, P62241, P36578, P62244, P62263, Q71UM5, P62249, P62917, P62277, P32969, P62906, P39023, P83731, P46777, P23396, P55769, P46778, P61313, P84098, P35268, P15880, P08708, Q15287, P61247, P08865, P18124, P62829,…	0	0	P62851, P30050, P62854, P62857, P50914, P05388, P62979, P39019, P18621, Q12906, P62424, P61513, P62913, P52272, Q02543, P62847, P62753, P62750, P62280, P25398, P62899, P46782, P62081, P62266, P62241, P36578, P62244, P62263, Q71UM5, P62249, P62917, P62277, P32969, P62906, P39023, P83731, P46777, P23396, P55769, P46778, P61313, P84098, P35268, P15880, P08708, Q15287, P61247, P08865, P18124, P62829,…	1	13.3333	4.9216	13.3333	4.69237	0.0425397	40S_ribosomal_subunit,_cytoplasmic::Nop56p-associated_pre-rRNA_complex::TRBP_containing_complex_(DICER,_RPL7A,_EIF6,_MOV10_and_subunits_of_the_60S_ribosomal_particle)::DICER1-NCOA6-AGO2_complex::RNA-induced_silencing_complex,_RISC::TRBP_containing_complex_(DICER,_TRBP,_AGO2,_RPL7A,_EIF6,_MOV10)::FIB-associated_protein_complex	0.412	129	40S_ribosomal_subunit,_cytoplasmic::Nop56p-associated_pre-rRNA_complex::TRBP_containing_complex_(DICER,_RPL7A,_EIF6,_MOV10_and_subunits_of_the_60S_ribosomal_particle)::DICER1-NCOA6-AGO2_complex::RNA-induced_silencing_complex,_RISC::TRBP_containing_complex_(DICER,_TRBP,_AGO2,_RPL7A,_EIF6,_MOV10)::FIB-associated_protein_complex	0.412	129	structural constituent of ribosome: 1.285e-101	RNA binding: 3.556e-35	rRNA binding: 6.073e-10	mRNA binding: 2.932e-06	fibroblast growth factor binding: 0.005978	laminin receptor activity: 0.008521	5S rRNA binding: 0.008521	mRNA 5'-UTR binding: 0.01551	metal ion binding: 0.02027	translation regulator activity: 0.02377	DNA binding: 0.03758	snoRNA binding: 0.04119	translation initiation factor binding: 0.04381	nucleic acid binding: 0.04599	protein kinase A binding: 0.05159	translation activator activity: 0.05287	DNA N-glycosylase activity: 0.05543	nucleotide binding: 0.05947	protein binding: 0.05987	DNA-(apurinic or apyrimidinic site) lyase activity: 0.063	cysteine-type endopeptidase activator activity involved in apoptotic process: 0.07167	laminin binding: 0.07412	iron-sulfur cluster binding: 0.09201
1035	2	Q9Y4R8, Q9BR76,	23.6667	1.8856	Q9Y4R8, Q9BR76,	1	17	1.633	-6.6667	4.62914	0.0436342							protein complex scaffold: 0.004692	actin filament binding: 0.01611	protein complex binding: 0.02053
1312	2	O14964, Q92783,	2.6667	1.2472	O14964, Q92783,	1	8.6667	1.8856	6	4.59684	0.0442094	RIN1-STAM2-EGFR_complex,_EGF_stimulated::RIN1-STAM2-HRS_complex	0.125	4	RIN1-STAM2-EGFR_complex,_EGF_stimulated::RIN1-STAM2-HRS_complex	0.125	4	SH3/SH2 adaptor activity: 0.006331	protein domain specific binding: 0.0281
1622	2	P60981, Q8NI22,	89.6667	6.0185	P60981, Q8NI22,	1	59	10.0333	-30.6667	4.53986	0.0452514							actin binding: 0.05292	calcium ion binding: 0.09204
1442	2	O95456, Q969U7,	37.3333	0.9428	O95456, Q969U7,	1	45	2.8284	7.6667	4.45399	0.046891
1126	2	O15047, Q15291,	0.3333	0.4714	O15047, Q15291,	1	6	2.1602	5.6667	4.4391	0.0471842	MLL-HCF_complex::MLL1-WDR5_complex::MOF_complex::Set1A_complex::Set1B_complex::MSL_complex	0.0556	36	MLL-HCF_complex::MLL1-WDR5_complex::MOF_complex::Set1A_complex::Set1B_complex::MSL_complex	0.0556	36	histone methyltransferase activity (H3-K4 specific): 5.829e-07	histone-lysine N-methyltransferase activity: 0.004112	methylated histone residue binding: 0.005367	transcription regulatory region DNA binding: 0.02683	nucleotide binding: 0.05475	RNA binding: 0.09431
427	31	O00487, P51665, O00232, P28066, P28062, O14818, P20618, Q15008, P35998, P25786, P25787, P25788, Q99460, P17980, P25789, P28074, P55036, P28070, P28072, Q13200, O43242, Q99436, P49720, P62191, P62333, P62195, P60900, P49721, O00231, P43686, Q9NYU2,	25	8.2865	O00487, P51665, O00232, P28066, P28062, O14818, P20618, Q15008, P35998, P25786, P25787, P25788, Q99460, P17980, P25789, P28074, P55036, P28070, P28072, Q13200, O43242, Q99436, P49720, P62191, P62333, P62195, P60900, P49721, O00231, P43686, Q9NYU2,	1	3.3333	1.6997	-21.6667	4.43643	0.0472372	20S_proteasome::26S_proteasome::PA700-20S-PA28_complex::PA28-20S_proteasome::PA700_complex::PA28gamma-20S_proteasome::Ubiquilin-proteasome_complex	0.6782	40	20S_proteasome::26S_proteasome::PA700-20S-PA28_complex::PA28-20S_proteasome::PA700_complex::PA28gamma-20S_proteasome::Ubiquilin-proteasome_complex	0.6782	40	threonine-type endopeptidase activity: 1.282e-34	ATPase activity: 2.917e-08	nucleoside-triphosphatase activity: 1.193e-07	endopeptidase activity: 3.76e-06	enzyme regulator activity: 6.86e-06	protein binding: 0.0002545	lipopolysaccharide binding: 0.0005483	UDP-glucose:glycoprotein glucosyltransferase activity: 0.004492	thyrotropin-releasing hormone receptor binding: 0.005237	purine ribonucleoside triphosphate binding: 0.007465	endopeptidase activator activity: 0.01189	peptidase activity: 0.01345	proteasome binding: 0.01773	TBP-class protein binding: 0.03835	metal ion binding: 0.04878	NF-kappaB binding: 0.05542	ATP binding: 0.09326	protein binding bridging: 0.09871
844	2	Q9Y6V7, Q9NRX1,	11.6667	1.2472	Q9Y6V7, Q9NRX1,	1	7.6667	0.9428	-4	4.43135	0.0473378							RNA binding: 0.002461	ATP-dependent helicase activity: 0.01262
1866	2	P07910, Q9UNL2,	7.3333	2.8674					-7.3333	4.42967	0.0473712	BAF_complex::Brg1-based_SWI/SNF_chromatin_remodeling_complex::EBAFa_complex::EBAFb_complex::SWI-SNF_chromatin_remodeling-related-BRCA1_complex::PBAF_complex_(Polybromo-_and_BAF_containing_complex)::NUMAC_complex_(nucleosomal_methylation_activator_complex)::p300-CBP-p270-SWI/SNF_complex::p300-CBP-p270_complex::BRG1-SIN3A-HDAC_containing_SWI/SNF_remodeling_complex_I::BRG1-SIN3A_complex::BRG1-associ…	0.0089	56				mRNA binding: 0.01348	nucleotide binding: 0.05475	identical protein binding: 0.06927	RNA binding: 0.09431
1127	2	P61964, Q9UBL3,	6	1.633	P61964, Q9UBL3,	1	1.6667	0.4714	-4.3333	4.41583	0.0476477	ASCOM_complex::UTX-MLL2/3_complex::WDR5-ASH2L-RBBP5-MLL2_complex::Menin-associated_histone_methyltransferase_complex::PTIP-HMT_complex	0.1053	19	ASCOM_complex::UTX-MLL2/3_complex::WDR5-ASH2L-RBBP5-MLL2_complex::Menin-associated_histone_methyltransferase_complex::PTIP-HMT_complex	0.1053	19	histone methyltransferase activity (H3-K4 specific): 5.829e-07	histone acetyltransferase activity (H4-K5 specific): 0.001211	histone acetyltransferase activity (H4-K8 specific): 0.001211	histone acetyltransferase activity (H4-K16 specific): 0.001211	transcription regulatory region DNA binding: 0.02683
1910	2	Q9NPG3, Q9UDY2,	14.6667	1.6997	Q9NPG3, Q9UDY2,	1	19	0	4.3333	4.41578	0.0476488							guanylate kinase activity: 0.001405
1477	2	P63096, P04899,	0	0	P63096, P04899,	1	6.3333	2.4944	6.3333	4.39769	0.0480137	NuMA-LGN-G-alpha-i-1_complex	0.1667	3	NuMA-LGN-G-alpha-i-1_complex	0.1667	3	guanyl nucleotide binding: 3.243e-07	G-protein beta/gamma-subunit complex binding: 2.92e-06	GTPase activity: 0.0003257	signal transducer activity: 0.0003461	G-protein coupled serotonin receptor binding: 0.0005331	GTP binding: 0.0007563	G-protein coupled receptor binding: 0.003243	metal ion binding: 0.01922
1167	2	Q8WYQ5, Q9H211,	3	0	Q8WYQ5, Q9H211,	1	0.6667	0.9428	-2.3333	4.28659	0.0503476	CNS-P53_complex::COP9_signalosome_complex::CSA-POLIIa_complex::CSA_complex::Ubiquitin_E3_ligase_(DDB1,_CUL4A,_RBX1)::DDB2_complex::Ubiquitin_E3_ligase_(DDB1,_DDB2,_CUL4A,_CUL4B,_RBX1)::Ubiquitin_E3_ligase_(CDT1,_DDB1,_CUL4A,_RBX1)::Ubiquitin_E3_ligase_(DET1,_DDB1,_CUL4A,_RBX1,_COP1)::Ubiquitin_E3_ligase_(AHR,_ARNT,_DDB1,_TBL3,_CUL4B,_RBX1)	0.0217	23	CNS-P53_complex::COP9_signalosome_complex::CSA-POLIIa_complex::CSA_complex::Ubiquitin_E3_ligase_(DDB1,_CUL4A,_RBX1)::DDB2_complex::Ubiquitin_E3_ligase_(DDB1,_DDB2,_CUL4A,_CUL4B,_RBX1)::Ubiquitin_E3_ligase_(CDT1,_DDB1,_CUL4A,_RBX1)::Ubiquitin_E3_ligase_(DET1,_DDB1,_CUL4A,_RBX1,_COP1)::Ubiquitin_E3_ligase_(AHR,_ARNT,_DDB1,_TBL3,_CUL4B,_RBX1)	0.0217	23	double-stranded RNA binding: 0.004788
1770	2	P00533, P39210,	2.3333	0.9428					-2.3333	4.28659	0.0503476	RIN1-STAM2-EGFR_complex,_EGF_stimulated::RIN1-STAM2-HRS_complex	0.125	4				epidermal growth factor-activated receptor activity: 0.0009691	nitric-oxide synthase regulator activity: 0.00126	receptor signaling protein tyrosine kinase activity: 0.00126	MAP kinase kinase kinase activity: 0.002615	transmembrane receptor protein tyrosine kinase activity: 0.006042	protein phosphatase binding: 0.008881	transmembrane signaling receptor activity: 0.01343	double-stranded DNA binding: 0.0152	actin filament binding: 0.01611	protein tyrosine kinase activity: 0.01716	enzyme binding: 0.0378	protein heterodimerization activity: 0.04915	chromatin binding: 0.05062	molecular_function: 0.06358	identical protein binding: 0.06927
1480	2	Q9Y5L0, Q05086,	5.6667	1.2472	Q9Y5L0, Q05086,	1	1.3333	1.2472	-4.3334	4.25538	0.051033	20S_proteasome::26S_proteasome::PA700-20S-PA28_complex::PA28-20S_proteasome::PA700_complex::PA28gamma-20S_proteasome::Ubiquilin-proteasome_complex	0.0125	40	20S_proteasome::26S_proteasome::PA700-20S-PA28_complex::PA28-20S_proteasome::PA700_complex::PA28gamma-20S_proteasome::Ubiquilin-proteasome_complex	0.0125	40	receptor activity: 0.02612	transcription coactivator activity: 0.03209	ubiquitin-protein ligase activity: 0.035
1033	2	Q12905, Q9NP81,	4	1.633	Q12905, Q9NP81,	1	0	0	-4	4.24262	0.0513171	DNA-PK-Ku-eIF2-NF90-NF45_complex	0.0625	8	DNA-PK-Ku-eIF2-NF90-NF45_complex	0.0625	8	serine-tRNA ligase activity: 0.0005816	double-stranded RNA binding: 0.004788	transferase activity: 0.01195	ATP binding: 0.0148
1885	2	O43674, Q13421,	2	0.8165					-2	4.24262	0.0513171	Respiratory_chain_complex_I_(beta_subunit)_mitochondrial::Respiratory_chain_complex_I_(gamma_subunit)_mitochondrial::Respiratory_chain_complex_I_(holoenzyme),_mitochondrial::Respiratory_chain_complex_I_(incomplete_intermediate),_mitochondrial::Respiratory_chain_complex_I_(intermediate_I/200kD_and_III/250kD),_mitochondrial::Respiratory_chain_complex_I_(intermediate_II/230kD),_mitochondrial::Respir…	0.0109	46				NADH dehydrogenase (ubiquinone) activity: 0.005511
283	4	Q92620, Q13838, Q9Y333, Q9Y5S9,	9	3.7417	Q92620, Q13838, Q9Y333, Q9Y5S9,	1	0	0	-9	4.16614	0.0530698	Postsplicing_complex::Upf_complex_(UPF1,_UPF2,_UPF3a)::Upf_complex_(UPF1,_UPF2,_UPF3b)	0.0357	7	Postsplicing_complex::Upf_complex_(UPF1,_UPF2,_UPF3a)::Upf_complex_(UPF1,_UPF2,_UPF3b)	0.0357	7	U6 snRNA binding: 2.472e-06	helicase activity: 0.0001681	ATP-dependent helicase activity: 0.000238	U4 snRNA binding: 0.001646	RNA-dependent ATPase activity: 0.002226	ATP-dependent protein binding: 0.003964	ATP-dependent RNA helicase activity: 0.008	mRNA binding: 0.0266	nucleic acid binding: 0.02949	protein binding: 0.03228	ATP binding: 0.06853	protein kinase binding: 0.09017
413	3	Q9H9B4, Q01844, Q9H061,	18.3333	1.2472	Q9H9B4, Q01844, Q9H061,	1	11	2.8284	-7.3333	4.10901	0.0544368	(E.F.G)_complex::12S_U11_snRNP::6S_methyltransferase_and_RG-containing_Sm_proteins_complex::20S_methylosome-SmD_complex::20S_methylosome_and_RG-containing_Sm_protein_complex::6S_methyltransferase_complex::JBP1-pICln_complex::SMN_complex,_U7_snRNA_specific::20S_methyltransferase_complex::AR_coactivator_complex::17S_U2_snRNP::SF3A1-SF3A2-SF3A3_complex::SF3b_complex::Exon_junction_complex::SRm160/30…	0.0014	245	(E.F.G)_complex::12S_U11_snRNP::6S_methyltransferase_and_RG-containing_Sm_proteins_complex::20S_methylosome-SmD_complex::20S_methylosome_and_RG-containing_Sm_protein_complex::6S_methyltransferase_complex::JBP1-pICln_complex::SMN_complex,_U7_snRNA_specific::20S_methyltransferase_complex::AR_coactivator_complex::17S_U2_snRNP::SF3A1-SF3A2-SF3A3_complex::SF3b_complex::Exon_junction_complex::SRm160/30…	0.0014	245	cation transmembrane transporter activity: 0.004351	calmodulin binding: 0.03701	nucleotide binding: 0.07981	molecular_function: 0.09224
1361	2	Q9H3S7, O14965,	0.3333	0.4714	Q9H3S7, O14965,	1	5.3333	2.0548	5	4.10793	0.054463	Tacc1-chTOG-AuroraA__complex	0.1667	3	Tacc1-chTOG-AuroraA__complex	0.1667	3	protein serine/threonine/tyrosine kinase activity: 0.003484	protein tyrosine phosphatase activity: 0.01386	ubiquitin protein ligase binding: 0.0256	protein kinase binding: 0.04735	protein kinase activity: 0.05461	protein serine/threonine kinase activity: 0.06063
1099	2	Q8IYD1, P78371,	92.6667	5.2493	Q8IYD1, P78371,	1	111.333	5.9067	18.6666	4.09147	0.0548666	SMG-1-Upf1-eRF1-eRF3_complex_(SURF)	0.1	5	SMG-1-Upf1-eRF1-eRF3_complex_(SURF)	0.1	5	unfolded protein binding: 0.01578	GTPase activity: 0.03547	GTP binding: 0.05351
1549	2	Q15370, Q15369,	344.667	0.9428	Q15370, Q15369,	1	335.333	3.8586	-9.3334	4.06986	0.0554032	Ubiquitin_E3_ligase_(ASB1,_TCEB1,_TCEB2,_CUL5,_RNF7)::Ubiquitin_E3_ligase_(ASB12,_TCEB1,_TCEB2,_CUL5,_RNF7)::Ubiquitin_E3_ligase_(ASB2,_TCEB1,_TCEB2,_CUL5,_RNF7)::Ubiquitin_E3_ligase_(ASB6,_TCEB1,_TCEB2,_CUL5,_RNF7)::Ubiquitin_E3_ligase_(ASB7,_TCEB1,_TCEB2,_CUL5,_RNF7)::Ubiquitin_E3_ligase_(WSB1,_TCEB1,_TCEB2,_CUL5,_RBX1)::Ubiquitin_E3_ligase_(VHL,_TCEB1,_TCEB2,_CUL2)::Ubiquitin_E3_ligase_(VHL,_T…	0.1429	14	Ubiquitin_E3_ligase_(ASB1,_TCEB1,_TCEB2,_CUL5,_RNF7)::Ubiquitin_E3_ligase_(ASB12,_TCEB1,_TCEB2,_CUL5,_RNF7)::Ubiquitin_E3_ligase_(ASB2,_TCEB1,_TCEB2,_CUL5,_RNF7)::Ubiquitin_E3_ligase_(ASB6,_TCEB1,_TCEB2,_CUL5,_RNF7)::Ubiquitin_E3_ligase_(ASB7,_TCEB1,_TCEB2,_CUL5,_RNF7)::Ubiquitin_E3_ligase_(WSB1,_TCEB1,_TCEB2,_CUL5,_RBX1)::Ubiquitin_E3_ligase_(VHL,_TCEB1,_TCEB2,_CUL2)::Ubiquitin_E3_ligase_(VHL,_T…	0.1429	14	translation elongation factor activity: 0.004016	protein complex binding: 0.02053	ubiquitin protein ligase binding: 0.0256
1354	2	Q9NUN5, P07910,	0	0	Q9NUN5, P07910,	1	9.3333	4.0277	9.3333	4.01364	0.0568353	BAF_complex::Brg1-based_SWI/SNF_chromatin_remodeling_complex::EBAFa_complex::EBAFb_complex::SWI-SNF_chromatin_remodeling-related-BRCA1_complex::PBAF_complex_(Polybromo-_and_BAF_containing_complex)::NUMAC_complex_(nucleosomal_methylation_activator_complex)::p300-CBP-p270-SWI/SNF_complex::p300-CBP-p270_complex::BRG1-SIN3A-HDAC_containing_SWI/SNF_remodeling_complex_I::BRG1-SIN3A_complex::BRG1-associ…	0.0089	56	BAF_complex::Brg1-based_SWI/SNF_chromatin_remodeling_complex::EBAFa_complex::EBAFb_complex::SWI-SNF_chromatin_remodeling-related-BRCA1_complex::PBAF_complex_(Polybromo-_and_BAF_containing_complex)::NUMAC_complex_(nucleosomal_methylation_activator_complex)::p300-CBP-p270-SWI/SNF_complex::p300-CBP-p270_complex::BRG1-SIN3A-HDAC_containing_SWI/SNF_remodeling_complex_I::BRG1-SIN3A_complex::BRG1-associ…	0.0089	56	cobalamin binding: 0.0007269	mRNA binding: 0.01348	nucleotide binding: 0.05475	identical protein binding: 0.06927	RNA binding: 0.09431
1903	2	Q00839, Q9Y320,	5	2.1602	Q00839, Q9Y320,	1	0	0	-5	4.00901	0.0569558	Emerin_complex_52	0.0217	23	Emerin_complex_52	0.0217	23	molecular_function: 0.06358	RNA binding: 0.09431
758	2	P09874, Q9NR30,	22	1.633	P09874, Q9NR30,	1	16.3333	1.8856	-5.6667	3.93477	0.058937	13S_condensin_complex::Condensin_I-PARP-1-XRCC1_complex::Condensin_I_complex::DNA_ligase_IV-condensin_complex	0.0625	8	13S_condensin_complex::Condensin_I-PARP-1-XRCC1_complex::Condensin_I_complex::DNA_ligase_IV-condensin_complex	0.0625	8	ATP-dependent RNA helicase activity: 0.004016	NAD+ ADP-ribosyltransferase activity: 0.004305	double-stranded RNA binding: 0.004788	NAD binding: 0.006716	protein N-terminus binding: 0.01506	transcription factor binding: 0.03817	identical protein binding: 0.06927
1258	2	P17028, P25787,	9.6667	0.4714	P17028, P25787,	1	6.6667	1.2472	-3	3.89717	0.0599791	20S_proteasome::26S_proteasome::PA700-20S-PA28_complex::PA28-20S_proteasome::PA700_complex::PA28gamma-20S_proteasome::Ubiquilin-proteasome_complex	0.0125	40	20S_proteasome::26S_proteasome::PA700-20S-PA28_complex::PA28-20S_proteasome::PA700_complex::PA28gamma-20S_proteasome::Ubiquilin-proteasome_complex	0.0125	40	threonine-type endopeptidase activity: 0.00334	endopeptidase activity: 0.006812	sequence-specific DNA binding: 0.06516
1379	2	P60981, Q96HC4,	6.6667	0.4714	P60981, Q96HC4,	1	3.6667	1.2472	-3	3.89717	0.0599791							actinin binding: 0.0007269	actin binding: 0.000739	protein kinase C binding: 0.006234	protein N-terminus binding: 0.01506
1091	2	Q12996, Q9H0L4,	64.6667	2.6247	Q12996, Q9H0L4,	1	58.6667	0.4714	-6	3.89707	0.0599819	BARD1-BRCA1-CSTF64_complex::BARD1-BRCA1-CSTF_complex::Cleavage_stimulation_factor::Polyadenylation_complex_(CSTF1,_CSTF2,_CSTF3,_SYMPK_CPSF1,_CPSF2,_CPSF3)::Cleavage_and_polyadenylation_factor_(CPSF)	0.0455	11	BARD1-BRCA1-CSTF64_complex::BARD1-BRCA1-CSTF_complex::Cleavage_stimulation_factor::Polyadenylation_complex_(CSTF1,_CSTF2,_CSTF3,_SYMPK_CPSF1,_CPSF2,_CPSF3)::Cleavage_and_polyadenylation_factor_(CPSF)	0.0455	11	RNA binding: 0.002461	nucleotide binding: 0.05475
684	2	Q9Y5V0, O14578,	39.6667	0.9428	Q9Y5V0, O14578,	1	37.3333	0.4714	-2.3334	3.8342	0.0617849							small GTPase regulator activity: 0.004981	SH3 domain binding: 0.01806	metal ion binding: 0.01922	phospholipid binding: 0.05044	protein serine/threonine kinase activity: 0.06063
516	8	Q9Y3B7, P49406, Q9P015, Q9BYC8, Q9BQC6, Q9BRJ2, Q9BYD2, Q9BYD1,	0	0	Q9Y3B7, P49406, Q9NX20, Q9P015, Q9BQC6, Q9BRJ2, Q9BYD2, Q9BYD1,	0.7656	2.6667	1.2472	2.6667	3.70338	0.065798							structural constituent of ribosome: 4.695e-16
759	2	Q9NZN4, O60231,	1	0.8165	Q9NZN4, O60231,	1	3.6667	0.9428	2.6667	3.70334	0.0657993	CF_IIAm_complex_(Cleavage_factor_IIAm_complex)	0.0312	16	CF_IIAm_complex_(Cleavage_factor_IIAm_complex)	0.0312	16	RNA helicase activity: 0.001357	nucleic acid binding: 0.005754	ATP-dependent helicase activity: 0.01262	ATP binding: 0.0148	protein domain specific binding: 0.0281	GTPase activity: 0.03547	GTP binding: 0.05351	calcium ion binding: 0.09204
710	2	P61019, O94905,	8.3333	1.6997	P61019, O94905,	1	17	3.7417	8.6667	3.65265	0.0674562							GDP binding: 0.006812	GTPase activity: 0.03547	GTP binding: 0.05351
1789	2	Q96HY6, Q15800,	16.3333	1.2472	Q96HY6, Q15800,	1	11.3333	2.0548	-5	3.6029	0.0691419							C-4 methylsterol oxidase activity: 0.0001454	iron ion binding: 0.01977	oxidoreductase activity: 0.02867
1018	2	O60907, Q96DI7,	35.3333	1.2472	O60907, Q96DI7,	1	42.6667	3.2998	7.3334	3.60067	0.0692192	Ubiquitin_E3_ligase_(SIAH1,_SIP,_SKP1A,_TBL1X)	0.125	4	Ubiquitin_E3_ligase_(SIAH1,_SIP,_SKP1A,_TBL1X)	0.125	4	histone binding: 0.009121	beta-catenin binding: 0.01219	transcription regulatory region DNA binding: 0.02683	transcription corepressor activity: 0.02697	protein domain specific binding: 0.0281	protein C-terminus binding: 0.02857	transcription factor binding: 0.03817	chromatin binding: 0.05062
1621	2	P60981, Q9Y508,	34.3333	3.0912	P60981, Q9Y508,	1	23.6667	4.1096	-10.6666	3.5927	0.0694953							actin binding: 0.05292
1872	2	Q16763, Q14258,	11	2.4495	Q16763, Q14258,	1	5.6667	0.9428	-5.3333	3.5195	0.0721075							ubiquitin-protein ligase activity: 0.000317	acid-amino acid ligase activity: 0.005752
1583	2	Q53FA7, P53350,	38	0.8165	Q53FA7, P53350,	1	50.3333	6.0185	12.3333	3.51715	0.0721936							anaphase-promoting complex binding: 0.0002908	NADPH:quinone reductase activity: 0.001114	quinone binding: 0.001405	NADPH binding: 0.001453	kinase activity: 0.02186	microtubule binding: 0.02536	oxidoreductase activity: 0.02867	protein kinase binding: 0.04735	protein kinase activity: 0.05461	protein serine/threonine kinase activity: 0.06063	protein homodimerization activity: 0.08226
531	6	P32780, P51948, Q13889, Q13888, Q92759, P19447,	7.3333	0.4714	P32780, P51948, Q13889, Q13888, Q92759, P19447,	1	8.6667	0.4714	1.3334	3.46431	0.074172	Actin-ribonucleoprotein_complex_(POLR2A,_GTF2F1,_HNRNPU)::BRCA1-RNA_polymerase_II_complex::BRCA1-core_RNA_polymerase_II_complex::RNA_polymerase_II_core_complex::RNA_polymerase_II_holoenzyme_complex::TFIIH_transcription_factor_core_complex::RNA_polymerase_II_(RNAPII)::RPAP1-RPB2-RPB3_complex::BRCA1-BARD1-POLR2A_complex::BRCA1-BARD1-BRCA2-DNA_damage_complex_III::Pre-initiation_complex_(PIC)::CAK-ER…	0.1538	39	Actin-ribonucleoprotein_complex_(POLR2A,_GTF2F1,_HNRNPU)::BRCA1-RNA_polymerase_II_complex::BRCA1-core_RNA_polymerase_II_complex::RNA_polymerase_II_core_complex::RNA_polymerase_II_holoenzyme_complex::TFIIH_transcription_factor_core_complex::RNA_polymerase_II_(RNAPII)::RPAP1-RPB2-RPB3_complex::BRCA1-BARD1-POLR2A_complex::BRCA1-BARD1-BRCA2-DNA_damage_complex_III::Pre-initiation_complex_(PIC)::CAK-ER…	0.1538	39	RNA polymerase II carboxy-terminal domain kinase activity: 6.583e-18	DNA-dependent ATPase activity: 4.019e-15	protein N-terminus binding: 4.803e-08	protein kinase activity: 1.012e-07	ATP-dependent DNA helicase activity: 9.529e-05	translation factor activity nucleic acid binding: 0.0001183	3'-5' DNA helicase activity: 0.0004362	damaged DNA binding: 0.0005398	dATP binding: 0.001453	sequence-specific DNA binding transcription factor activity: 0.004441	peptide binding: 0.01465	protein binding: 0.04729	ATPase activity: 0.06027	zinc ion binding: 0.07863	protein C-terminus binding: 0.08086
907	2	Q9Y490, O94966,	0.3333	0.4714	Q9Y490, O94966,	1	1.6667	0.4714	1.3334	3.46431	0.074172	CAS-SRC-FAK_complex::Polycystin-1_multiprotein_complex_(ACTN1,_CDH1,_SRC,_JUP,_VCL,_CTNNB1,_PXN,_BCAR1,_PKD1,_PTK2,_TLN1)::Polycystin-1-E-cadherin-beta-catenin_complex::Polycystin-1-E-cadherin-beta-catenin-Flotillin-2_complex::PXN-ITGB5-PTK2_complex	0.0385	13	CAS-SRC-FAK_complex::Polycystin-1_multiprotein_complex_(ACTN1,_CDH1,_SRC,_JUP,_VCL,_CTNNB1,_PXN,_BCAR1,_PKD1,_PTK2,_TLN1)::Polycystin-1-E-cadherin-beta-catenin_complex::Polycystin-1-E-cadherin-beta-catenin-Flotillin-2_complex::PXN-ITGB5-PTK2_complex	0.0385	13	LIM domain binding: 0.001502	insulin receptor binding: 0.003871	vinculin binding: 0.004257	ubiquitin-specific protease activity: 0.009265	ubiquitin thiolesterase activity: 0.01224	cysteine-type peptidase activity: 0.0141	structural constituent of cytoskeleton: 0.01573	actin binding: 0.05292
1134	2	Q6N069, Q8IUF8,	1.6667	0.4714	Q6N069, Q8IUF8,	1	0.3333	0.4714	-1.3334	3.46431	0.074172							acetyltransferase activity: 0.001114	RNA polymerase II transcription factor binding transcription factor activity involved in negative regulation of transcription: 0.001163	dioxygenase activity: 0.001453	ribosome binding: 0.004209
1458	2	Q8NE86, P33527,	0.3333	0.4714	Q8NE86, P33527,	1	1.6667	0.4714	1.3334	3.46431	0.074172							uniporter activity: 4.848e-05	ATPase activity coupled to transmembrane movement of substances: 0.005174	calcium channel activity: 0.007727	ATPase activity: 0.02096	transporter activity: 0.03017
1507	2	Q13765, P11498,	0.3333	0.4714	Q13765, P11498,	1	1.6667	0.4714	1.3334	3.46431	0.074172							pyruvate carboxylase activity: 0.0001939	biotin binding: 0.0008238	biotin carboxylase activity: 0.001599	TBP-class protein binding: 0.002566	DNA binding: 0.01533	transcription coactivator activity: 0.03209
1635	2	Q9C0B5, P61088,	3.6667	0.4714	Q9C0B5, P61088,	1	2.3333	0.4714	-1.3334	3.46431	0.074172							palmitoyltransferase activity: 0.001066	protein-cysteine S-palmitoyltransferase activity: 0.003146	acid-amino acid ligase activity: 0.005752	transferase activity transferring acyl groups: 0.007101	ubiquitin binding: 0.00739	ubiquitin-protein ligase activity: 0.035
1873	2	Q9P0U1, Q16611,	1.6667	0.4714	Q9P0U1, Q16611,	1	0.3333	0.4714	-1.3334	3.46431	0.074172							BH domain binding: 0.0001939	protein transmembrane transporter activity: 0.0005816	heat shock protein binding: 0.003146	chaperone binding: 0.006427	protein heterodimerization activity: 0.04915	identical protein binding: 0.06927	protein homodimerization activity: 0.08226
480	8	Q9BUE0, O60244, Q9NPJ6, O75448, Q9P086, Q15648, Q15528, Q96G25,	6	1.4142	Q9BUE0, O60244, Q9NPJ6, O75448, Q9P086, Q15648, Q15528, Q96G25,	1	2	1.4142	-4	3.46413	0.0741786	ARC-L_complex::ARC_complex::CCNC-CDK8-MED1-MED6-MED7_xcomplex::Mediator_complex_1::Mediator_complex_2::hMediator_complex_(MED23,_CDK8,_CCNC)::hMediator_complex_(MED23,_CDK8,_CCNC,_MED7)::ARC92-Mediator_complex::Mediator_complex::CRSP-Mediator_2_complex::CRSP_complex::MED18-MED20-MED29_mediator_subcomplex::NAT_complex::TRAP-SMCC_mediator_complex::PC2_complex::SMCC_complex::TRAP_complex::DRIP_compl…	0.1905	42	ARC-L_complex::ARC_complex::CCNC-CDK8-MED1-MED6-MED7_xcomplex::Mediator_complex_1::Mediator_complex_2::hMediator_complex_(MED23,_CDK8,_CCNC)::hMediator_complex_(MED23,_CDK8,_CCNC,_MED7)::ARC92-Mediator_complex::Mediator_complex::CRSP-Mediator_2_complex::CRSP_complex::MED18-MED20-MED29_mediator_subcomplex::NAT_complex::TRAP-SMCC_mediator_complex::PC2_complex::SMCC_complex::TRAP_complex::DRIP_compl…	0.1905	42	RNA polymerase II transcription cofactor activity: 1.567e-21	vitamin D receptor binding: 3.819e-11	thyroid hormone receptor binding: 8.652e-10	ligand-dependent nuclear receptor transcription coactivator activity: 4.108e-09	transcription cofactor activity: 2.934e-08	receptor activity: 2.015e-06	transcription coactivator activity: 0.000223	mediator complex binding: 0.001163	LBD domain binding: 0.002323	thyroid hormone receptor coactivator activity: 0.002516	peroxisome proliferator activated receptor binding: 0.007514	retinoic acid receptor binding: 0.01038	core promoter binding: 0.01057	ligand-dependent nuclear receptor binding: 0.01209	estrogen receptor binding: 0.0155	histone acetyltransferase activity: 0.02169	sequence-specific DNA binding RNA polymerase II transcription factor activity: 0.03622	protein binding: 0.05389
266	4	O60506, P04844, P04843, Q8TCJ2,	7.3333	0.4714	O60506, P04844, P04843, Q8TCJ2,	1	4.6667	1.2472	-2.6666	3.46407	0.0741813	Oligosaccharyltransferase_complex_(Stt3A_variant)::Oligosaccharyltransferase_complex_(Stt3B_variant)	0.2812	8	Oligosaccharyltransferase_complex_(Stt3A_variant)::Oligosaccharyltransferase_complex_(Stt3B_variant)	0.2812	8	dolichyl-diphosphooligosaccharide-protein glycotransferase activity: 9.993e-10	poly(A) RNA binding: 0.004927	ribosome binding: 0.008383
921	2	P10599, Q9BZL1,	30.6667	2.6247	P10599, Q9BZL1,	1	23.6667	2.357	-7	3.43692	0.0752281							peptide disulfide oxidoreductase activity: 4.848e-05	protein disulfide oxidoreductase activity: 0.004498	enzyme binding: 0.0378	molecular_function: 0.06358
1311	2	P17568, P03886,	26.6667	1.6997	P17568, P03886,	1	22	1.633	-4.6667	3.42928	0.075527	Ecsit_complex_(ECSIT,_MT-CO2,_GAPDH,_TRAF6,_NDUFAF1)::Ecsit_complex_(ECSIT,_MT-CO2,_NDUFA1,_MT-ND1,_TRAF6,_NDUFAF1)::Ecsit_complex_(ECSIT,_NDUFS3,_NDUFAF1)::Ecsit_complex_(ECSIT,_NDUFS3,_TOM20)	0.0556	9	Ecsit_complex_(ECSIT,_MT-CO2,_GAPDH,_TRAF6,_NDUFAF1)::Ecsit_complex_(ECSIT,_MT-CO2,_NDUFA1,_MT-ND1,_TRAF6,_NDUFAF1)::Ecsit_complex_(ECSIT,_NDUFS3,_NDUFAF1)::Ecsit_complex_(ECSIT,_NDUFS3,_TOM20)	0.0556	9	NADH dehydrogenase (ubiquinone) activity: 7.569e-06
1868	2	Q15645, Q86V81,	9.6667	3.6818	Q15645, Q86V81,	1	2.3333	0.4714	-7.3334	3.42196	0.0758144	(E.F.G)_complex::12S_U11_snRNP::6S_methyltransferase_and_RG-containing_Sm_proteins_complex::20S_methylosome-SmD_complex::20S_methylosome_and_RG-containing_Sm_protein_complex::6S_methyltransferase_complex::JBP1-pICln_complex::SMN_complex,_U7_snRNA_specific::20S_methyltransferase_complex::AR_coactivator_complex::17S_U2_snRNP::SF3A1-SF3A2-SF3A3_complex::SF3b_complex::Exon_junction_complex::SRm160/30…	0.002	245	(E.F.G)_complex::12S_U11_snRNP::6S_methyltransferase_and_RG-containing_Sm_proteins_complex::20S_methylosome-SmD_complex::20S_methylosome_and_RG-containing_Sm_protein_complex::6S_methyltransferase_complex::JBP1-pICln_complex::SMN_complex,_U7_snRNA_specific::20S_methyltransferase_complex::AR_coactivator_complex::17S_U2_snRNP::SF3A1-SF3A2-SF3A3_complex::SF3b_complex::Exon_junction_complex::SRm160/30…	0.002	245	nucleoside-triphosphatase activity: 0.007631	transcription cofactor activity: 0.009121	nucleotide binding: 0.05475	identical protein binding: 0.06927	RNA binding: 0.09431
349	62	P62851, P30050, P62854, P62857, P50914, P62899, P05388, P62979, P39019, P18621, Q12906, P62424, P61513, P62913, P62280, Q02543, P22087, Q9P287, P62753, P62750, P52272, P25398, P55769, P46782, P62081, P62266, P62241, P36578, P62244, P62263, Q71UM5, P62249, P62917, P62277, P26373, P32969, P62906, P39023, P83731, P46777, P23396, P61313, P46778, P84098, P35268, P15880, P08708, P61247, P08865, P18124,…	40.3333	3.2998	P62851, P30050, P62854, P62857, P50914, P62899, P05388, P62979, P39019, P18621, Q12906, P62424, P61513, P62913, P62280, Q02543, P22087, Q9P287, P62753, P62750, P52272, P25398, P55769, P46782, P62081, P62266, P62241, P36578, P62244, P62263, Q71UM5, P62249, P62917, P62277, P26373, P32969, P62906, P39023, P83731, P46777, P23396, P61313, P46778, P84098, P35268, P15880, P08708, P61247, P08865, P18124,…	1	30.3333	3.8586	-10	3.41146	0.0762296	40S_ribosomal_subunit,_cytoplasmic::Nop56p-associated_pre-rRNA_complex::TRBP_containing_complex_(DICER,_RPL7A,_EIF6,_MOV10_and_subunits_of_the_60S_ribosomal_particle)::DICER1-NCOA6-AGO2_complex::RNA-induced_silencing_complex,_RISC::TRBP_containing_complex_(DICER,_TRBP,_AGO2,_RPL7A,_EIF6,_MOV10)::FIB-associated_protein_complex	0.4206	129	40S_ribosomal_subunit,_cytoplasmic::Nop56p-associated_pre-rRNA_complex::TRBP_containing_complex_(DICER,_RPL7A,_EIF6,_MOV10_and_subunits_of_the_60S_ribosomal_particle)::DICER1-NCOA6-AGO2_complex::RNA-induced_silencing_complex,_RISC::TRBP_containing_complex_(DICER,_TRBP,_AGO2,_RPL7A,_EIF6,_MOV10)::FIB-associated_protein_complex	0.4206	129	structural constituent of ribosome: 1.85e-101	RNA binding: 5.72e-34	rRNA binding: 8.249e-10	mRNA binding: 3.92e-06	kinase regulator activity: 0.005985	fibroblast growth factor binding: 0.006568	laminin receptor activity: 0.008951	5S rRNA binding: 0.008951	metal ion binding: 0.01506	mRNA 5'-UTR binding: 0.01629	translation regulator activity: 0.02495	DNA binding: 0.0294	snoRNA binding: 0.04319	translation initiation factor binding: 0.04593	protein binding: 0.04877	protein kinase A binding: 0.05406	translation activator activity: 0.0554	DNA N-glycosylase activity: 0.05807	DNA-(apurinic or apyrimidinic site) lyase activity: 0.06598	cysteine-type endopeptidase activator activity involved in apoptotic process: 0.07503	laminin binding: 0.07758	iron-sulfur cluster binding: 0.09619
1884	2	Q93009, Q13426,	3.3333	1.6997	Q93009, Q13426,	1	0	0	-3.3333	3.39674	0.0768173	DNA_double-strand_break_end-joining_complex::DNA_ligase_IV-XRCC4-AHNK_complex::DNA_ligase_IV-XRCC4-PNK_complex::DNA_ligase_IV-XRCC4-XLF_complex	0.05	10	DNA_double-strand_break_end-joining_complex::DNA_ligase_IV-XRCC4-AHNK_complex::DNA_ligase_IV-XRCC4-PNK_complex::DNA_ligase_IV-XRCC4-XLF_complex	0.05	10	protein C-terminus binding: 0.0002098	p53 binding: 0.008688	ubiquitin-specific protease activity: 0.009265	cysteine-type endopeptidase activity: 0.009937	ubiquitin thiolesterase activity: 0.01224	ligase activity: 0.01329	cysteine-type peptidase activity: 0.0141	ubiquitin protein ligase binding: 0.0256	transcription factor binding: 0.03817
1888	2	Q15542, Q15543,	3.3333	1.6997					-3.3333	3.39674	0.0768173	DAB_complex::DA_complex::TFIID_subcomplex::Transcription_initiation_factor_complex_(TAF1,_TAF5,_TAF11,_TAF12,_TBP)::Transcription_initiation_factor_complex_(TAF5,_TAF6,_TAF9,_TAF11,_TBP)::TFIID-beta_complex::TFIID_complex::TFIID_complex,_B-cell_specific::TFIIA-TRF2_complex::GCN5-TRRAP_histone_acetyltransferase_complex::STAGA_core_complex_(SPT3-TAF9-GCN5_acetyltransferase_complex)::PCAF_complex::S…	0.0571	35				sequence-specific DNA binding transcription factor activity: 0.004193	histone acetyltransferase activity: 0.005511	protein dimerization activity: 0.0211	transcription regulatory region DNA binding: 0.02683	protein C-terminus binding: 0.02857	protein heterodimerization activity: 0.04915
602	2	P41208, Q01831,	7.3333	0.9428	P41208, Q01831,	1	4.3333	1.2472	-3	3.32351	0.0798406							heterotrimeric G-protein binding: 0.0001939	loop DNA binding: 0.0002908	bubble DNA binding: 0.0004847	G-protein beta/gamma-subunit complex binding: 0.003436	single-stranded DNA binding: 0.0107	damaged DNA binding: 0.01209	ATP-dependent helicase activity: 0.01262	microtubule binding: 0.02536	calcium ion binding: 0.09204
919	2	P10599, P61086,	6.3333	0.9428	P10599, P61086,	1	9.3333	1.2472	3	3.32351	0.0798406							peptide disulfide oxidoreductase activity: 4.848e-05	ubiquitin-ubiquitin ligase activity: 0.001211	protein disulfide oxidoreductase activity: 0.004498	acid-amino acid ligase activity: 0.005752	ubiquitin protein ligase binding: 0.0256	ubiquitin-protein ligase activity: 0.035	enzyme binding: 0.0378
800	2	Q9GZZ9, Q9BU02,	8.3333	2.357	Q9GZZ9, Q9BU02,	1	2.3333	2.0548	-6	3.32349	0.0798416							thiamin-triphosphatase activity: 0.0001939	UFM1 activating enzyme activity: 0.0002908	cofactor binding: 0.00334	oxidoreductase activity acting on the CH-OH group of donors NAD or NADP as acceptor: 0.004305	metal ion binding: 0.01922	hydrolase activity: 0.02899	catalytic activity: 0.04231
79	4	P04406, P06733, P00558, P60174,	15	2.1602	P04406, P06733, P00558, P60174,	1	8	2.9439	-7	3.32043	0.0799716	GAIT_complex	0.0625	4	GAIT_complex	0.0625	4	peptidyl-cysteine S-nitrosylase activity: 0.0001939	glyceraldehyde-3-phosphate dehydrogenase (NAD+) (phosphorylating) activity: 0.0003877	triose-phosphate isomerase activity: 0.0003877	phosphoglycerate kinase activity: 0.0003877	phosphopyruvate hydratase activity: 0.001936	NAD binding: 0.01334	NADP binding: 0.01382	protein binding: 0.03228	microtubule binding: 0.04944	transcription corepressor activity: 0.05248	magnesium ion binding: 0.05868
178	31	O00487, P51665, O00232, P28066, P28062, O14818, P20618, Q15008, P35998, P25786, P25787, P25788, P25789, P17980, Q6NZY4, P28074, P55036, P28070, P28072, Q13200, O43242, Q99436, Q99460, P49720, P49721, P62333, P62195, P60900, P62191, O00231, P43686,	2.3333	0.9428	O00487, P51665, O00232, P28066, P28062, O14818, P20618, Q15008, P35998, P25786, P25787, P25788, P25789, P17980, Q6NZY4, P28074, P55036, P28070, P28072, Q13200, O43242, Q99436, Q99460, P49720, P49721, P62333, P62195, P60900, P62191, O00231, P43686,	1	0.3333	0.4714	-2	3.28637	0.08144	20S_proteasome::26S_proteasome::PA700-20S-PA28_complex::PA28-20S_proteasome::PA700_complex::PA28gamma-20S_proteasome::Ubiquilin-proteasome_complex	0.6782	40	20S_proteasome::26S_proteasome::PA700-20S-PA28_complex::PA28-20S_proteasome::PA700_complex::PA28gamma-20S_proteasome::Ubiquilin-proteasome_complex	0.6782	40	threonine-type endopeptidase activity: 1.282e-34	ATPase activity: 2.917e-08	nucleoside-triphosphatase activity: 1.193e-07	endopeptidase activity: 3.76e-06	enzyme regulator activity: 6.86e-06	protein binding: 6.236e-05	lipopolysaccharide binding: 0.0005483	thyrotropin-releasing hormone receptor binding: 0.005237	purine ribonucleoside triphosphate binding: 0.007465	endopeptidase activator activity: 0.01189	peptidase activity: 0.01345	proteasome binding: 0.01773	TBP-class protein binding: 0.03835	metal ion binding: 0.04878	NF-kappaB binding: 0.05542	ATP binding: 0.09326	protein binding bridging: 0.09871
927	2	O75489, P08195,	1.6667	0.4714	O75489, P08195,	1	3.6667	0.9428	2	3.28637	0.08144	Ecsit_complex_(ECSIT,_MT-CO2,_GAPDH,_TRAF6,_NDUFAF1)::Ecsit_complex_(ECSIT,_MT-CO2,_NDUFA1,_MT-ND1,_TRAF6,_NDUFAF1)::Ecsit_complex_(ECSIT,_NDUFS3,_NDUFAF1)::Ecsit_complex_(ECSIT,_NDUFS3,_TOM20)	0.0556	9	Ecsit_complex_(ECSIT,_MT-CO2,_GAPDH,_TRAF6,_NDUFAF1)::Ecsit_complex_(ECSIT,_MT-CO2,_NDUFA1,_MT-ND1,_TRAF6,_NDUFAF1)::Ecsit_complex_(ECSIT,_NDUFS3,_NDUFAF1)::Ecsit_complex_(ECSIT,_NDUFS3,_TOM20)	0.0556	9	NADH dehydrogenase activity: 0.0009691	cation binding: 0.001357	calcium:sodium antiporter activity: 0.001357	neutral amino acid transmembrane transporter activity: 0.00155	NADH dehydrogenase (ubiquinone) activity: 0.005511	electron carrier activity: 0.01257	catalytic activity: 0.04231
1628	2	Q96G25, P10412,	6.6667	0.4714	Q96G25, P10412,	1	4.6667	0.9428	-2	3.28637	0.08144	ARC-L_complex::ARC_complex::CCNC-CDK8-MED1-MED6-MED7_xcomplex::Mediator_complex_1::Mediator_complex_2::hMediator_complex_(MED23,_CDK8,_CCNC)::hMediator_complex_(MED23,_CDK8,_CCNC,_MED7)::ARC92-Mediator_complex::Mediator_complex::CRSP-Mediator_2_complex::CRSP_complex::MED18-MED20-MED29_mediator_subcomplex::NAT_complex::TRAP-SMCC_mediator_complex::PC2_complex::SMCC_complex::TRAP_complex::DRIP_compl…	0.0119	42	ARC-L_complex::ARC_complex::CCNC-CDK8-MED1-MED6-MED7_xcomplex::Mediator_complex_1::Mediator_complex_2::hMediator_complex_(MED23,_CDK8,_CCNC)::hMediator_complex_(MED23,_CDK8,_CCNC,_MED7)::ARC92-Mediator_complex::Mediator_complex::CRSP-Mediator_2_complex::CRSP_complex::MED18-MED20-MED29_mediator_subcomplex::NAT_complex::TRAP-SMCC_mediator_complex::PC2_complex::SMCC_complex::TRAP_complex::DRIP_compl…	0.0119	42	RNA polymerase II transcription cofactor activity: 0.005174
564	2	Q01082, Q9UBK7,	2.3333	0.9428	Q01082, Q9UBK7,	1	0.3333	0.4714	-2	3.28637	0.08144							ankyrin binding: 0.003291	structural constituent of cytoskeleton: 0.01573	calmodulin binding: 0.02499	GTPase activity: 0.03547	phospholipid binding: 0.05044	actin binding: 0.05292	GTP binding: 0.05351
1506	2	Q16576, O14929,	1.3333	0.4714	Q16576, O14929,	1	4.6667	1.6997	3.3334	3.27329	0.082014	EED-EZH-YY1_polycomb_complex::EED-EZH2_complex::Polycomb_repressive_complex_2_(PRC2)::Polycomb_repressive_complex_2_(PRC_2)::Polycomb_repressive_complex_3_(PRC3)::Polycomb_repressive_complex_4_(PRC4)	0.0625	8	EED-EZH-YY1_polycomb_complex::EED-EZH2_complex::Polycomb_repressive_complex_2_(PRC2)::Polycomb_repressive_complex_2_(PRC_2)::Polycomb_repressive_complex_3_(PRC3)::Polycomb_repressive_complex_4_(PRC4)	0.0625	8	histone acetyltransferase activity: 0.005511
237	4	Q9HBM1, Q9BZD4, Q8NBT2, O14777,	235.667	2.0548	Q9HBM1, Q9BZD4, Q8NBT2, O14777,	1	242.333	2.8674	6.6666	3.27327	0.0820149	NDC80_kinetochore_complex	1	4	NDC80_kinetochore_complex	1	4	protein binding: 0.03228
114	50	P62851, Q08211, P30050, P62854, P55769, Q07020, P05388, P39019, P46782, P46781, P62424, P61513, P62913, P62280, Q02543, P50914, P62753, P62750, P52272, P62899, Q12906, Q12905, P62081, P62266, P62241, P36578, P62244, P62263, P49792, P62249, P62906, P46777, P23396, P61313, P62829, P35268, P15880, P61247, P08865, P18124, P84098, P62701, P62847, P27635, P62888, P62277, P60866, P32969, Q02878, Q8NHW5,	9.3333	2.6247	P62851, Q08211, P30050, P62854, P55769, Q07020, P05388, P39019, P46782, P62424, P61513, P62913, P62280, Q02543, P50914, P62753, P62750, P52272, P62899, Q12906, Q12905, P62081, P62266, P62241, P36578, P62244, P62263, P49792, P62249, Q96L21, P62906, P46777, P23396, P61313, P62829, P35268, P15880, P61247, P08865, P18124, P84098, P62701, P62847, P27635, P62888, P62277, P60866, P32969, Q02878, Q8NHW5,	0.9604	2.6667	2.357	-6.6666	3.27323	0.0820167	40S_ribosomal_subunit,_cytoplasmic::Nop56p-associated_pre-rRNA_complex::TRBP_containing_complex_(DICER,_RPL7A,_EIF6,_MOV10_and_subunits_of_the_60S_ribosomal_particle)::DICER1-NCOA6-AGO2_complex::RNA-induced_silencing_complex,_RISC::TRBP_containing_complex_(DICER,_TRBP,_AGO2,_RPL7A,_EIF6,_MOV10)::FIB-associated_protein_complex	0.3572	129	40S_ribosomal_subunit,_cytoplasmic::Nop56p-associated_pre-rRNA_complex::TRBP_containing_complex_(DICER,_RPL7A,_EIF6,_MOV10_and_subunits_of_the_60S_ribosomal_particle)::DICER1-NCOA6-AGO2_complex::RNA-induced_silencing_complex,_RISC::TRBP_containing_complex_(DICER,_TRBP,_AGO2,_RPL7A,_EIF6,_MOV10)::FIB-associated_protein_complex	0.3425	129	structural constituent of ribosome: 1.473e-78	RNA binding: 7.627e-33	rRNA binding: 2.171e-10	mRNA binding: 1.098e-06	translation regulator activity: 0.0001924	fibroblast growth factor binding: 0.004355	metal ion binding: 0.004605	protein binding: 0.005005	double-stranded RNA binding: 0.006237	laminin receptor activity: 0.007229	5S rRNA binding: 0.007229	mRNA 5'-UTR binding: 0.01317	RNA helicase activity: 0.03286	snoRNA binding: 0.03513	ATP binding: 0.03574	translation initiation factor binding: 0.03738	protein kinase A binding: 0.04407	DNA N-glycosylase activity: 0.04738	zinc ion binding: 0.05059	DNA-(apurinic or apyrimidinic site) lyase activity: 0.05393	laminin binding: 0.06357	iron-sulfur cluster binding: 0.07918	NF-kappaB binding: 0.08626	protein kinase binding: 0.08824	ATP-dependent RNA helicase activity: 0.09124	ribosome binding: 0.09519
1160	2	Q9BUR4, Q7Z5K2,	0	0	Q9BUR4, Q7Z5K2,	1	8	4.2426	8	3.26602	0.0823357							RNA binding: 0.09431
346	3	Q9P0L0, Q14157, P63027,	4	0.8165	Q9P0L0, Q14157, P63027,	1	1.6667	0.9428	-2.3333	3.24034	0.0834864	SNARE_complex_(HGS,_SNAP25,_STX13)::SNARE_complex_(SNAP25,_VAMP3,_VAMP2,_NAPB,_STX13)::SNARE_complex_(VAMP2,_SNAP25,_STX13)	0.0556	6	SNARE_complex_(HGS,_SNAP25,_STX13)::SNARE_complex_(SNAP25,_VAMP3,_VAMP2,_NAPB,_STX13)::SNARE_complex_(VAMP2,_SNAP25,_STX13)	0.0556	6	syntaxin-1 binding: 0.005001	myosin binding: 0.005146	protein complex binding: 0.03048	calmodulin binding: 0.03701	protein C-terminus binding: 0.04224	structural molecule activity: 0.04237	signal transducer activity: 0.05379	protein heterodimerization activity: 0.07187	phospholipid binding: 0.0737	protein binding: 0.07615
313	8	Q9NVC6, Q9BUE0, O60244, Q9NPJ6, O75448, Q9P086, Q15648, Q96G25,	7	1.4142	Q9NVC6, Q9BUE0, O60244, Q9NPJ6, O75448, Q9P086, Q15648, Q96G25,	1	4	0.8165	-3	3.182	0.0861875	ARC-L_complex::ARC_complex::CCNC-CDK8-MED1-MED6-MED7_xcomplex::Mediator_complex_1::Mediator_complex_2::hMediator_complex_(MED23,_CDK8,_CCNC)::hMediator_complex_(MED23,_CDK8,_CCNC,_MED7)::ARC92-Mediator_complex::Mediator_complex::CRSP-Mediator_2_complex::CRSP_complex::MED18-MED20-MED29_mediator_subcomplex::NAT_complex::TRAP-SMCC_mediator_complex::PC2_complex::SMCC_complex::TRAP_complex::DRIP_compl…	0.1905	42	ARC-L_complex::ARC_complex::CCNC-CDK8-MED1-MED6-MED7_xcomplex::Mediator_complex_1::Mediator_complex_2::hMediator_complex_(MED23,_CDK8,_CCNC)::hMediator_complex_(MED23,_CDK8,_CCNC,_MED7)::ARC92-Mediator_complex::Mediator_complex::CRSP-Mediator_2_complex::CRSP_complex::MED18-MED20-MED29_mediator_subcomplex::NAT_complex::TRAP-SMCC_mediator_complex::PC2_complex::SMCC_complex::TRAP_complex::DRIP_compl…	0.1905	42	RNA polymerase II transcription cofactor activity: 1.567e-21	vitamin D receptor binding: 2.446e-14	thyroid hormone receptor binding: 1.261e-12	ligand-dependent nuclear receptor transcription coactivator activity: 8.949e-12	transcription cofactor activity: 1.057e-10	receptor activity: 2.146e-08	transcription coactivator activity: 4.603e-06	mediator complex binding: 0.001163	LBD domain binding: 0.002323	thyroid hormone receptor coactivator activity: 0.002516	peroxisome proliferator activated receptor binding: 0.007514	retinoic acid receptor binding: 0.01038	core promoter binding: 0.01057	ligand-dependent nuclear receptor binding: 0.01209	estrogen receptor binding: 0.0155	histone acetyltransferase activity: 0.02169	sequence-specific DNA binding RNA polymerase II transcription factor activity: 0.03622
736	2	Q15599, P61916,	6	1.4142	Q15599, P61916,	1	3	0.8165	-3	3.182	0.0861875							cholesterol binding: 0.005608	phosphatase binding: 0.005897	beta-catenin binding: 0.01219	protein C-terminus binding: 0.02857	enzyme binding: 0.0378	receptor binding: 0.03901
876	2	Q99755, P48729,	37	0.8165	Q99755, P48729,	1	34	1.4142	-3	3.182	0.0861875							1-phosphatidylinositol-4-phosphate 5-kinase activity: 0.0009691	phosphatidylinositol phosphate kinase activity: 0.001018	kinase binding: 0.00739	ATP binding: 0.0148	protein kinase activity: 0.05461	protein serine/threonine kinase activity: 0.06063
1380	2	Q13505, Q9NZ45,	28	2.9439	Q13505, Q9NZ45,	1	21	2.4495	-7	3.16588	0.0869562							2 iron 2 sulfur cluster binding: 0.002421
524	8	Q15545, Q15542, Q15543, Q16594, P20226, O00268, P49848, Q12962,	3.6667	0.9428	Q15545, Q15542, Q15543, Q16594, P20226, O00268, P49848, Q12962,	1	8.6667	2.6247	5	3.10527	0.089935	DAB_complex::DA_complex::TFIID_subcomplex::Transcription_initiation_factor_complex_(TAF1,_TAF5,_TAF11,_TAF12,_TBP)::Transcription_initiation_factor_complex_(TAF5,_TAF6,_TAF9,_TAF11,_TBP)::TFIID-beta_complex::TFIID_complex::TFIID_complex,_B-cell_specific::TFIIA-TRF2_complex::GCN5-TRRAP_histone_acetyltransferase_complex::STAGA_core_complex_(SPT3-TAF9-GCN5_acetyltransferase_complex)::PCAF_complex::S…	0.2286	35	DAB_complex::DA_complex::TFIID_subcomplex::Transcription_initiation_factor_complex_(TAF1,_TAF5,_TAF11,_TAF12,_TBP)::Transcription_initiation_factor_complex_(TAF5,_TAF6,_TAF9,_TAF11,_TBP)::TFIID-beta_complex::TFIID_complex::TFIID_complex,_B-cell_specific::TFIIA-TRF2_complex::GCN5-TRRAP_histone_acetyltransferase_complex::STAGA_core_complex_(SPT3-TAF9-GCN5_acetyltransferase_complex)::PCAF_complex::S…	0.2286	35	histone acetyltransferase activity: 1.135e-06	sequence-specific DNA binding transcription factor activity: 1.799e-06	transcription regulatory region DNA binding: 2.243e-06	transcription coactivator activity: 4.603e-06	protein heterodimerization activity: 2.539e-05	protein binding: 0.001041	DNA binding: 0.001095	RNA polymerase binding: 0.002709	vitamin D receptor binding: 0.007131	C2H2 zinc finger domain binding: 0.007705	histone acetyltransferase binding: 0.009234	transcription factor binding: 0.009419	thyroid hormone receptor binding: 0.01512	estrogen receptor binding: 0.0155	RNA polymerase II repressing transcription factor binding: 0.01794	activating transcription factor binding: 0.01851	repressing transcription factor binding: 0.02336	p53 binding: 0.03386	protein dimerization activity: 0.07917
1594	2	P55809, P31939,	4	0.8165	P55809, P31939,	1	1.3333	1.2472	-2.6667	3.09845	0.0902789							CoA-transferase activity: 9.696e-05	3-oxoacid CoA-transferase activity: 0.0001454	IMP cyclohydrolase activity: 0.0003878	phosphoribosylaminoimidazolecarboxamide formyltransferase activity: 0.0003878	protein homodimerization activity: 0.001846
1478	2	P62873, P04899,	7.3333	4.1096	P62873, P04899,	1	0	0	-7.3333	3.09073	0.0906713	G_protein_complex_(BTK,_GNG1,_GNG2)::G_protein_complex_(CACNA1A,_GNB1,_GNG2)::G_protein_complex_(HDAC4,_GNB1,_GNG2)::G_protein_complex_(HDAC5,_GNB1,_GNG2)::G_protein_complex_(MCF2,_GNB1,_GNG2)::G_protein_complex_(PTHR1,_GNB1,_GNG2)	0.0625	8	G_protein_complex_(BTK,_GNG1,_GNG2)::G_protein_complex_(CACNA1A,_GNB1,_GNG2)::G_protein_complex_(HDAC4,_GNB1,_GNG2)::G_protein_complex_(HDAC5,_GNB1,_GNG2)::G_protein_complex_(MCF2,_GNB1,_GNG2)::G_protein_complex_(PTHR1,_GNB1,_GNG2)	0.0625	8	GTPase activity: 0.0003257	signal transducer activity: 0.0003461	guanyl nucleotide binding: 0.001163	GTPase binding: 0.001599	G-protein coupled receptor binding: 0.003243	G-protein beta/gamma-subunit complex binding: 0.003436	GTP binding: 0.05351
260	60	P62851, P18621, P62854, P62857, P50914, Q07020, P05388, P62979, P39019, Q12906, P07355, P62424, P46776, P61513, P62913, P62280, P30050, P62847, P62753, P62750, P52272, P25398, P62899, P46782, Q02543, P62266, P62241, P36578, P62244, P62263, Q71UM5, P62249, P62917, Q96L21, P32969, P62906, P39023, P83731, P46777, P23396, P61313, P46778, P62829, P35268, P15880, P08708, P61247, P08865, P18124, P84098,…	115.333	10.274	P62851, P18621, P62854, P62857, P50914, Q07020, P05388, P62979, P39019, Q12906, P07355, P62424, P46776, P61513, P62913, P62280, P30050, P62847, P62753, P62750, P52272, P25398, P62899, P46782, Q02543, P62266, P62241, P36578, P62244, P62263, Q71UM5, P62249, P62917, Q96L21, P32969, P62906, P39023, P83731, P46777, P23396, P61313, P46778, P62829, P35268, P15880, P08708, P61247, P08865, P18124, P84098,…	1	96	3.559	-19.3333	3.07977	0.0912318	40S_ribosomal_subunit,_cytoplasmic::Nop56p-associated_pre-rRNA_complex::TRBP_containing_complex_(DICER,_RPL7A,_EIF6,_MOV10_and_subunits_of_the_60S_ribosomal_particle)::DICER1-NCOA6-AGO2_complex::RNA-induced_silencing_complex,_RISC::TRBP_containing_complex_(DICER,_TRBP,_AGO2,_RPL7A,_EIF6,_MOV10)::FIB-associated_protein_complex	0.4052	129	40S_ribosomal_subunit,_cytoplasmic::Nop56p-associated_pre-rRNA_complex::TRBP_containing_complex_(DICER,_RPL7A,_EIF6,_MOV10_and_subunits_of_the_60S_ribosomal_particle)::DICER1-NCOA6-AGO2_complex::RNA-induced_silencing_complex,_RISC::TRBP_containing_complex_(DICER,_TRBP,_AGO2,_RPL7A,_EIF6,_MOV10)::FIB-associated_protein_complex	0.4052	129	structural constituent of ribosome: 1.157e-106	RNA binding: 2.972e-33	rRNA binding: 6.738e-10	mRNA binding: 3.236e-06	fibroblast growth factor binding: 0.006172	laminin receptor activity: 0.008664	5S rRNA binding: 0.008664	mRNA 5'-UTR binding: 0.01577	metal ion binding: 0.01837	translation regulator activity: 0.02416	DNA binding: 0.03465	translation initiation factor binding: 0.04452	protein kinase A binding: 0.05241	translation activator activity: 0.05372	DNA N-glycosylase activity: 0.05631	DNA-(apurinic or apyrimidinic site) lyase activity: 0.064	protein binding: 0.06677	phospholipase inhibitor activity: 0.06905	cysteine-type endopeptidase activator activity involved in apoptotic process: 0.0728	laminin binding: 0.07528	iron-sulfur cluster binding: 0.09341
170	14	P07814, Q12904, O43324, P22314, P54136, Q13155, Q15046, P56192, Q9P2J5, P47897, P41250, P41252, P08243, P14868,	16	1.633	P07814, Q12904, O43324, P22314, P54136, Q13155, Q15046, P56192, Q9P2J5, P47897, P41250, P41252, P08243, P14868,	1	11.3333	2.0548	-4.6667	3.07961	0.09124	Multisynthetase_complex	0.7857	11	Multisynthetase_complex	0.7857	11	ATP binding: 2.117e-08	tRNA binding: 2.929e-08	aminoacyl-tRNA ligase activity: 2.061e-06	aminoacyl-tRNA editing activity: 3.187e-05	glycine-tRNA ligase activity: 0.0003394	proline-tRNA ligase activity: 0.0006785	glutamate-tRNA ligase activity: 0.001356	lysine-tRNA ligase activity: 0.001356	RNA stem-loop binding: 0.002033	glutamine-tRNA ligase activity: 0.002371	isoleucine-tRNA ligase activity: 0.002371	leucine-tRNA ligase activity: 0.002709	arginine binding: 0.003046	aspartate-tRNA ligase activity: 0.003046	arginine-tRNA ligase activity: 0.003046	methionine-tRNA ligase activity: 0.003384	asparagine synthase (glutamine-hydrolyzing) activity: 0.003721	aminoacylase activity: 0.00574	small protein activating enzyme activity: 0.009088	protein binding: 0.02064	cofactor binding: 0.02292	amino acid binding: 0.02422	ligase activity: 0.08586	cytokine activity: 0.08869	protein homodimerization activity: 0.09921
1257	2	O75717, Q03405,	2	1.633	O75717, Q03405,	1	6.6667	2.0548	4.6667	3.07961	0.09124	CD98-LAT2-ITGB1_complex::ITAGV-ITGB3-F11R_complex::ITGA2B-ITGB3-F11R_complex::ITGA2B-ITGB3-ICAM4_complex::ITGA2b-ITGB3-TLN1_complex::ITGAV-ITGB3-ADAM15_complex::ITGAV-ITGB3-ADAM23_complex::ITGAV-ITGB3-COL4A3_complex::ITGAV-ITGB3-EGFR_complex::ITGAV-ITGB3-LAMA4_complex::ITGAV-ITGB3-NOV_complex::ITGAV-ITGB3-PPAP2b_complex::ITGAV-ITGB3-SLC3A2_complex::ITGAV-ITGB3-SPP1_complex::ITGAV-ITGB1-SPP1_compl…	0.0074	68	CD98-LAT2-ITGB1_complex::ITAGV-ITGB3-F11R_complex::ITGA2B-ITGB3-F11R_complex::ITGA2B-ITGB3-ICAM4_complex::ITGA2b-ITGB3-TLN1_complex::ITGAV-ITGB3-ADAM15_complex::ITGAV-ITGB3-ADAM23_complex::ITGAV-ITGB3-COL4A3_complex::ITGAV-ITGB3-EGFR_complex::ITGAV-ITGB3-LAMA4_complex::ITGAV-ITGB3-NOV_complex::ITGAV-ITGB3-PPAP2b_complex::ITGAV-ITGB3-SLC3A2_complex::ITGAV-ITGB3-SPP1_complex::ITGAV-ITGB1-SPP1_compl…	0.0074	68	urokinase plasminogen activator receptor activity: 0.0001454	RNA polymerase binding: 0.0006785	receptor activity: 0.02612	enzyme binding: 0.0378	chromatin binding: 0.05062	RNA binding: 0.09431
836	2	Q9NRX5, P11717,	1.3333	0.9428	Q9NRX5, P11717,	1	5.3333	2.0548	4	3.06453	0.0920195	RAB9-TIP47-MPRI_complex	0.1667	3	RAB9-TIP47-MPRI_complex	0.1667	3	insulin-like growth factor-activated receptor activity: 0.0004362	L-serine transmembrane transporter activity: 0.0005816	mannose binding: 0.002276	insulin-like growth factor binding: 0.002373	phosphoprotein binding: 0.003388	glycoprotein binding: 0.005608	receptor activity: 0.02612	transporter activity: 0.03017	identical protein binding: 0.06927
1504	2	O75367, Q9BTC0,	2.6667	0.9428	O75367, Q9BTC0,	1	1	0	-1.6667	3.06195	0.092154	TDT-TDIF2-core-histone_complex	0.125	4	TDT-TDIF2-core-histone_complex	0.125	4	protein heterodimerization activity: 0.04915	chromatin binding: 0.05062
753	2	Q6N069, P41227,	0	0	Q6N069, P41227,	1	1.6667	0.9428	1.6667	3.06195	0.092154							acetyltransferase activity: 2.973e-07	ribosome binding: 4.396e-06	peptide alpha-N-acetyltransferase activity: 0.0008723	N-acetyltransferase activity: 0.003291
1516	2	Q13162, O00488,	40	0	Q13162, O00488,	1	38.3333	0.9428	-1.6667	3.06195	0.092154							thioredoxin peroxidase activity: 0.0003393	peroxiredoxin activity: 0.0004362	antioxidant activity: 0.002131	transcription corepressor activity: 0.02697	oxidoreductase activity: 0.02867
1408	2	Q9Y2X9, Q15648,	7	0.8165	Q9Y2X9, Q15648,	1	8.6667	0.4714	1.6667	3.06192	0.0921556	BRD4-P-TEFb_complex::BRD4_complex::P-TEFb-BRD4-TRAP220_complex::Heterotrimeric_complex_(CCNT1,_CDK9,_GRN)::P-TEFb-7SKRNA-HEXIM1_complex::P-TEFb-SKP2_complex::Transcription_elongation_factor_complex_(SUPT5H,_CDK9,_CCNT1)	0.0417	12	BRD4-P-TEFb_complex::BRD4_complex::P-TEFb-BRD4-TRAP220_complex::Heterotrimeric_complex_(CCNT1,_CDK9,_GRN)::P-TEFb-7SKRNA-HEXIM1_complex::P-TEFb-SKP2_complex::Transcription_elongation_factor_complex_(SUPT5H,_CDK9,_CCNT1)	0.0417	12	core promoter binding: 1.745e-06	mediator complex binding: 0.0002908	LBD domain binding: 0.0005816	thyroid hormone receptor coactivator activity: 0.00063	vitamin D receptor binding: 0.001792	peroxisome proliferator activated receptor binding: 0.001889	retinoic acid receptor binding: 0.002615	ligand-dependent nuclear receptor binding: 0.00305	thyroid hormone receptor binding: 0.003823	estrogen receptor binding: 0.003919	RNA polymerase II transcription cofactor activity: 0.005174	ligand-dependent nuclear receptor transcription coactivator activity: 0.005608	transcription cofactor activity: 0.009121	sequence-specific DNA binding RNA polymerase II transcription factor activity: 0.009313	receptor activity: 0.02612	transcription regulatory region DNA binding: 0.02683	transcription corepressor activity: 0.02697	transcription coactivator activity: 0.03209	transcription factor binding: 0.03817	chromatin binding: 0.05062	sequence-specific DNA binding: 0.06516
360	6	P62312, Q9UK45, P62310, Q9Y333, O60231, Q9Y4Z0,	0.3333	0.4714	P62312, Q9UK45, P62310, Q9Y333, O60231, Q9Y4Z0,	1	2	0.8165	1.6667	3.06192	0.0921556	(E.F.G)_complex::12S_U11_snRNP::6S_methyltransferase_and_RG-containing_Sm_proteins_complex::20S_methylosome-SmD_complex::20S_methylosome_and_RG-containing_Sm_protein_complex::6S_methyltransferase_complex::JBP1-pICln_complex::SMN_complex,_U7_snRNA_specific::20S_methyltransferase_complex::AR_coactivator_complex::17S_U2_snRNP::SF3A1-SF3A2-SF3A3_complex::SF3b_complex::Exon_junction_complex::SRm160/30…	0.0245	245	(E.F.G)_complex::12S_U11_snRNP::6S_methyltransferase_and_RG-containing_Sm_proteins_complex::20S_methylosome-SmD_complex::20S_methylosome_and_RG-containing_Sm_protein_complex::6S_methyltransferase_complex::JBP1-pICln_complex::SMN_complex,_U7_snRNA_specific::20S_methyltransferase_complex::AR_coactivator_complex::17S_U2_snRNP::SF3A1-SF3A2-SF3A3_complex::SF3b_complex::Exon_junction_complex::SRm160/30…	0.0245	245	U6 snRNA binding: 6.172e-06	RNA binding: 0.002095	RNA helicase activity: 0.004059	protein binding: 0.005797	ATP-dependent helicase activity: 0.03691
1881	2	P23193, Q13435,	0.3333	0.4714	P23193, Q13435,	1	2	0.8165	1.6667	3.06192	0.0921556	(E.F.G)_complex::12S_U11_snRNP::6S_methyltransferase_and_RG-containing_Sm_proteins_complex::20S_methylosome-SmD_complex::20S_methylosome_and_RG-containing_Sm_protein_complex::6S_methyltransferase_complex::JBP1-pICln_complex::SMN_complex,_U7_snRNA_specific::20S_methyltransferase_complex::AR_coactivator_complex::17S_U2_snRNP::SF3A1-SF3A2-SF3A3_complex::SF3b_complex::Exon_junction_complex::SRm160/30…	0.002	245	(E.F.G)_complex::12S_U11_snRNP::6S_methyltransferase_and_RG-containing_Sm_proteins_complex::20S_methylosome-SmD_complex::20S_methylosome_and_RG-containing_Sm_protein_complex::6S_methyltransferase_complex::JBP1-pICln_complex::SMN_complex,_U7_snRNA_specific::20S_methyltransferase_complex::AR_coactivator_complex::17S_U2_snRNP::SF3A1-SF3A2-SF3A3_complex::SF3b_complex::Exon_junction_complex::SRm160/30…	0.002	245	translation elongation factor activity: 0.004016
629	2	P15924, P61020,	0.3333	0.4714	P15924, P61020,	1	2	0.8165	1.6667	3.06192	0.0921556							GTP-dependent protein binding: 0.001599	scaffold protein binding: 0.004209	protein kinase C binding: 0.006234	GDP binding: 0.006812	protein binding bridging: 0.007053	structural constituent of cytoskeleton: 0.01573	structural molecule activity: 0.02867	GTPase activity: 0.03547	GTP binding: 0.05351
1313	2	P00338, P40925,	605.667	0.4714	P00338, P40925,	1	604	0.8165	-1.6667	3.06192	0.0921556							oxidoreductase activity acting on the CH-OH group of donors NAD or NADP as acceptor: 4.602e-06	diiodophenylpyruvate reductase activity: 0.0003878	L-malate dehydrogenase activity: 0.0005331	malate dehydrogenase activity: 0.0005816	malic enzyme activity: 0.0008238	L-lactate dehydrogenase activity: 0.001211	NAD binding: 0.006716
854	2	Q8NFH4, Q9Y4L1,	89.6667	4.6428	Q8NFH4, Q9Y4L1,	1	98	0.8165	8.3333	3.06185	0.0921595	NPC_subcomplex_(NUP98,_NUP107,_NUP133,_NUP160)::Nup_107-160_subcomplex	0.0556	9	NPC_subcomplex_(NUP98,_NUP107,_NUP133,_NUP160)::Nup_107-160_subcomplex	0.0556	9
715	2	Q15005, O00264,	8.6667	1.2472	Q15005, O00264,	1	6.3333	0.4714	-2.3334	3.03122	0.0937761							steroid binding: 0.003533	peptidase activity: 0.01166	heme binding: 0.0173
1497	2	Q06124, P49841,	91.6667	3.3993	Q06124, P49841,	1	83.6667	3.0912	-8	3.01577	0.0946068	LMO4-gp130_complex	0.1	5	LMO4-gp130_complex	0.1	5	peptide hormone receptor binding: 0.001308	non-membrane spanning protein tyrosine phosphatase activity: 0.001405	tau protein binding: 0.001453	protein kinase A catalytic subunit binding: 0.001599	tau-protein kinase activity: 0.002179	phospholipase binding: 0.002228	insulin receptor substrate binding: 0.002808	ionotropic glutamate receptor binding: 0.003001	NF-kappaB binding: 0.003774	insulin receptor binding: 0.003871	RNA polymerase II transcription factor binding: 0.004498	receptor tyrosine kinase binding: 0.004836	phosphoprotein phosphatase activity: 0.005077	SH3/SH2 adaptor activity: 0.006331	p53 binding: 0.008688	beta-catenin binding: 0.01219	integrin binding: 0.01329	protein tyrosine phosphatase activity: 0.01386	kinase activity: 0.02186	ubiquitin protein ligase binding: 0.0256	protein domain specific binding: 0.0281	protein kinase binding: 0.04735	protein serine/threonine kinase activity: 0.06063
1008	2	O75528, Q96ES7,	11.3333	1.6997	O75528, Q96ES7,	1	7.6667	1.2472	-3.6666	3.0124	0.0947894	DAB_complex::DA_complex::TFIID_subcomplex::Transcription_initiation_factor_complex_(TAF1,_TAF5,_TAF11,_TAF12,_TBP)::Transcription_initiation_factor_complex_(TAF5,_TAF6,_TAF9,_TAF11,_TBP)::TFIID-beta_complex::TFIID_complex::TFIID_complex,_B-cell_specific::TFIIA-TRF2_complex::GCN5-TRRAP_histone_acetyltransferase_complex::STAGA_core_complex_(SPT3-TAF9-GCN5_acetyltransferase_complex)::PCAF_complex::S…	0.0143	35	DAB_complex::DA_complex::TFIID_subcomplex::Transcription_initiation_factor_complex_(TAF1,_TAF5,_TAF11,_TAF12,_TBP)::Transcription_initiation_factor_complex_(TAF5,_TAF6,_TAF9,_TAF11,_TBP)::TFIID-beta_complex::TFIID_complex::TFIID_complex,_B-cell_specific::TFIIA-TRF2_complex::GCN5-TRRAP_histone_acetyltransferase_complex::STAGA_core_complex_(SPT3-TAF9-GCN5_acetyltransferase_complex)::PCAF_complex::S…	0.0143	35	ligand-dependent nuclear receptor binding: 0.00305	methylated histone residue binding: 0.005367	histone acetyltransferase activity: 0.005511	ligand-dependent nuclear receptor transcription coactivator activity: 0.005608	protein domain specific binding: 0.0281	transcription coactivator activity: 0.03209
357	3	O43237, Q9Y6G9, Q14204,	66.3333	3.0912	O43237, Q9Y6G9, Q14204,	1	54.3333	6.1824	-12	3.00697	0.0950847	(E.F.G)_complex::12S_U11_snRNP::6S_methyltransferase_and_RG-containing_Sm_proteins_complex::20S_methylosome-SmD_complex::20S_methylosome_and_RG-containing_Sm_protein_complex::6S_methyltransferase_complex::JBP1-pICln_complex::SMN_complex,_U7_snRNA_specific::20S_methyltransferase_complex::AR_coactivator_complex::17S_U2_snRNP::SF3A1-SF3A2-SF3A3_complex::SF3b_complex::Exon_junction_complex::SRm160/30…	0.0014	245	(E.F.G)_complex::12S_U11_snRNP::6S_methyltransferase_and_RG-containing_Sm_proteins_complex::20S_methylosome-SmD_complex::20S_methylosome_and_RG-containing_Sm_protein_complex::6S_methyltransferase_complex::JBP1-pICln_complex::SMN_complex,_U7_snRNA_specific::20S_methyltransferase_complex::AR_coactivator_complex::17S_U2_snRNP::SF3A1-SF3A2-SF3A3_complex::SF3b_complex::Exon_junction_complex::SRm160/30…	0.0014	245	microtubule motor activity: 2.044e-07	ATP binding: 0.001801	ATPase activity coupled: 0.003483
1096	2	Q06830, Q9UJC5,	38.6667	3.2998	Q06830, Q9UJC5,	1	45	1.633	6.3333	2.97944	0.0966025							thioredoxin peroxidase activity: 0.0003393	peroxidase activity: 0.002276	heme binding: 0.0173	SH3 domain binding: 0.01806	protein homodimerization activity: 0.08226
821	2	P49821, Q9UBQ0,	4.6667	1.2472	P49821, Q9UBQ0,	1	7.6667	1.2472	3	2.94599	0.0984936	Retromer_complex_(SNX1,_SNX2,_VPS35,_VPS29,_VPS26A)::VPS35-VPS29-VPS26A_complex::Retromer_complex_(SNX1,_SNX2,_VPS35,_VPS29,_VPS26B)	0.0833	6	Retromer_complex_(SNX1,_SNX2,_VPS35,_VPS29,_VPS26A)::VPS35-VPS29-VPS26A_complex::Retromer_complex_(SNX1,_SNX2,_VPS35,_VPS29,_VPS26B)	0.0833	6	phosphoserine phosphatase activity: 0.0004362	oxidoreductase activity acting on NAD(P)H: 0.002276	FMN binding: 0.002615	hydrolase activity acting on ester bonds: 0.003484	NADH dehydrogenase (ubiquinone) activity: 0.005511	4 iron 4 sulfur cluster binding: 0.006668	NAD binding: 0.006716	metal ion binding: 0.01922
880	2	Q9NUH8, Q9H9B4,	3.6667	1.2472	Q9NUH8, Q9H9B4,	1	6.6667	1.2472	3	2.94599	0.0984936							cation transmembrane transporter activity: 0.002905
1016	2	P14649, P60660,	8.6667	1.6997	P14649, P60660,	1	11.6667	0.4714	3	2.9459	0.0984986	CRKL-WIPF1-WAS_complex::ZAP70-CRKL-WIPF1-WAS_complex::WIP-WASp-actin-myosin-IIa_complex	0.0625	8	CRKL-WIPF1-WAS_complex::ZAP70-CRKL-WIPF1-WAS_complex::WIP-WASp-actin-myosin-IIa_complex	0.0625	8	structural constituent of muscle: 1.476e-05	motor activity: 3.068e-05	actin-dependent ATPase activity: 0.002131	calcium ion binding: 0.002337
1803	2	Q1KMD3, O60812,	6	3.559					-6	2.92001	0.0999987							nucleotide binding: 0.05475	RNA binding: 0.09431
1456	2	P04844, P27824,	18.3333	1.6997	P04844, P27824,	1	25.3333	3.8586	7	2.87554	0.102651	Oligosaccharyltransferase_complex_(Stt3A_variant)::Oligosaccharyltransferase_complex_(Stt3B_variant)	0.0625	8	Oligosaccharyltransferase_complex_(Stt3A_variant)::Oligosaccharyltransferase_complex_(Stt3B_variant)	0.0625	8	dolichyl-diphosphooligosaccharide-protein glycotransferase activity: 0.001308	apolipoprotein binding: 0.002615	ionotropic glutamate receptor binding: 0.003001	ribosome binding: 0.004209	unfolded protein binding: 0.01578	calcium ion binding: 0.09204
501	3	Q9Y5M8, P60903, Q6PI78,	19	1.4142	Q9Y5M8, P60903, Q6PI78,	1	22.6667	1.6997	3.6667	2.87229	0.102849							GTP binding: 0.07806
325	8	Q15545, Q15542, Q9HBM6, Q16594, O00268, P21675, P49848, Q12962,	9.6667	3.8586	Q15545, Q15542, Q9HBM6, Q16594, O00268, P21675, P49848, Q12962,	1	17	2.1602	7.3333	2.87229	0.10285	DAB_complex::DA_complex::TFIID_subcomplex::Transcription_initiation_factor_complex_(TAF1,_TAF5,_TAF11,_TAF12,_TBP)::Transcription_initiation_factor_complex_(TAF5,_TAF6,_TAF9,_TAF11,_TBP)::TFIID-beta_complex::TFIID_complex::TFIID_complex,_B-cell_specific::TFIIA-TRF2_complex::GCN5-TRRAP_histone_acetyltransferase_complex::STAGA_core_complex_(SPT3-TAF9-GCN5_acetyltransferase_complex)::PCAF_complex::S…	0.2286	35	DAB_complex::DA_complex::TFIID_subcomplex::Transcription_initiation_factor_complex_(TAF1,_TAF5,_TAF11,_TAF12,_TBP)::Transcription_initiation_factor_complex_(TAF5,_TAF6,_TAF9,_TAF11,_TBP)::TFIID-beta_complex::TFIID_complex::TFIID_complex,_B-cell_specific::TFIIA-TRF2_complex::GCN5-TRRAP_histone_acetyltransferase_complex::STAGA_core_complex_(SPT3-TAF9-GCN5_acetyltransferase_complex)::PCAF_complex::S…	0.2286	35	histone acetyltransferase activity: 3.829e-09	transcription coactivator activity: 6.071e-08	transcription regulatory region DNA binding: 2.243e-06	protein heterodimerization activity: 2.539e-05	sequence-specific DNA binding transcription factor activity: 5.205e-05	p53 binding: 0.0005165	protein binding: 0.001041	RNA polymerase binding: 0.002709	vitamin D receptor binding: 0.007131	C2H2 zinc finger domain binding: 0.007705	histone acetyltransferase binding: 0.009234	transcription factor binding: 0.009419	histone acetyl-lysine binding: 0.009615	TBP-class protein binding: 0.01019	thyroid hormone receptor binding: 0.01512	estrogen receptor binding: 0.0155	activating transcription factor binding: 0.01851	DNA binding: 0.05488	protein dimerization activity: 0.07917	transcription corepressor activity: 0.09934
1753	2	P49591, P26639,	96.6667	9.5336	P49591, P26639,	1	78	6.1644	-18.6667	2.84787	0.104353							serine-tRNA ligase activity: 0.0005816	threonine-tRNA ligase activity: 0.00063	ATP binding: 0.0148	protein homodimerization activity: 0.08226	RNA binding: 0.09431
1294	2	Q14694, Q9Y4E8,	62	2.1602	Q14694, Q9Y4E8,	1	57.3333	1.8856	-4.6667	2.81892	0.106176							ubiquitin-specific protease activity: 2.155e-05	cysteine-type endopeptidase activity: 2.481e-05	ubiquitin thiolesterase activity: 3.776e-05	transforming growth factor beta receptor binding: 0.001792	SMAD binding: 0.005849	p53 binding: 0.008688	ion channel binding: 0.01157	cysteine-type peptidase activity: 0.0141	identical protein binding: 0.06927
1317	2	Q09161, P52298,	114.333	2.4944	Q09161, P52298,	1	119	1.4142	4.6667	2.81891	0.106177	(E.F.G)_complex::12S_U11_snRNP::6S_methyltransferase_and_RG-containing_Sm_proteins_complex::20S_methylosome-SmD_complex::20S_methylosome_and_RG-containing_Sm_protein_complex::6S_methyltransferase_complex::JBP1-pICln_complex::SMN_complex,_U7_snRNA_specific::20S_methyltransferase_complex::AR_coactivator_complex::17S_U2_snRNP::SF3A1-SF3A2-SF3A3_complex::SF3b_complex::Exon_junction_complex::SRm160/30…	0.0082	245	(E.F.G)_complex::12S_U11_snRNP::6S_methyltransferase_and_RG-containing_Sm_proteins_complex::20S_methylosome-SmD_complex::20S_methylosome_and_RG-containing_Sm_protein_complex::6S_methyltransferase_complex::JBP1-pICln_complex::SMN_complex,_U7_snRNA_specific::20S_methyltransferase_complex::AR_coactivator_complex::17S_U2_snRNP::SF3A1-SF3A2-SF3A3_complex::SF3b_complex::Exon_junction_complex::SRm160/30…	0.0082	245	RNA cap binding: 1.112e-06	RNA 7-methylguanosine cap binding: 0.0003393	RNA binding: 0.002461	nucleotide binding: 0.05475
1362	2	Q9UBU8, Q9Y230,	21	2.8284	Q9UBU8, Q9Y230,	1	16.3333	0.4714	-4.6667	2.8189	0.106178	MAF1_complex::MRG15-PAM14-RB_complex	0.1667	3	MAF1_complex::MRG15-PAM14-RB_complex	0.1667	3	ATP-dependent 5'-3' DNA helicase activity: 0.0007754	DNA helicase activity: 0.003774	ATP-dependent DNA helicase activity: 0.005077	damaged DNA binding: 0.01209	protein N-terminus binding: 0.01506	unfolded protein binding: 0.01578	ATPase activity: 0.02096	chromatin binding: 0.05062	identical protein binding: 0.06927
1029	2	P49750, Q6NUQ1,	22	1.633	P49750, Q6NUQ1,	1	18.6667	1.2472	-3.3333	2.80974	0.106764	SNARE_complex_(RINT1,_ZW10,_p31)	0.1667	3	SNARE_complex_(RINT1,_ZW10,_p31)	0.1667	3	molecular_function: 0.06358
853	2	Q9H9B4, Q9BWM7,	26.6667	2.357	Q9H9B4, Q9BWM7,	1	20.6667	2.8674	-6	2.7998	0.107405							cation transmembrane transporter activity: 2.08e-06
1329	2	Q9H2G2, Q15233,	5.6667	2.8674	Q9H2G2, Q15233,	1	12.6667	3.2998	7	2.77345	0.109132	TLE1_corepressor_complex_(MASH1_promoter-corepressor_complex)	0.05	10	TLE1_corepressor_complex_(MASH1_promoter-corepressor_complex)	0.05	10	identical protein binding: 0.00129	nucleotide binding: 0.05475	protein serine/threonine kinase activity: 0.06063	protein homodimerization activity: 0.08226	RNA binding: 0.09431
308	31	O00487, P51665, O00232, P28066, P28062, O14818, P20618, Q15008, P35998, P25786, P25787, P25788, P25789, P31948, P17980, P28074, P55036, P28070, P28072, Q13200, O43242, Q99436, Q99460, P49720, P49721, P62333, P62195, P60900, P62191, O00231, P43686,	12	4.9666	O00487, P51665, O00232, P28066, P28062, O14818, P20618, Q15008, P35998, P25786, P25787, P25788, P25789, P31948, P17980, P28074, P55036, P28070, P28072, Q13200, O43242, Q99436, Q99460, P49720, P49721, P62333, P62195, P60900, P62191, O00231, P43686,	1	4	0.8165	-8	2.75296	0.110502	20S_proteasome::26S_proteasome::PA700-20S-PA28_complex::PA28-20S_proteasome::PA700_complex::PA28gamma-20S_proteasome::Ubiquilin-proteasome_complex	0.6782	40	20S_proteasome::26S_proteasome::PA700-20S-PA28_complex::PA28-20S_proteasome::PA700_complex::PA28gamma-20S_proteasome::Ubiquilin-proteasome_complex	0.6782	40	threonine-type endopeptidase activity: 1.282e-34	ATPase activity: 2.917e-08	nucleoside-triphosphatase activity: 1.193e-07	endopeptidase activity: 3.76e-06	enzyme regulator activity: 6.86e-06	protein binding: 6.236e-05	lipopolysaccharide binding: 0.0005483	thyrotropin-releasing hormone receptor binding: 0.005237	purine ribonucleoside triphosphate binding: 0.007465	endopeptidase activator activity: 0.01189	peptidase activity: 0.01345	proteasome binding: 0.01773	Hsp70 protein binding: 0.02351	TBP-class protein binding: 0.03835	metal ion binding: 0.04878	NF-kappaB binding: 0.05542	chaperone binding: 0.09078	ATP binding: 0.09326	protein binding bridging: 0.09871
1223	2	Q9Y6N9, P22314,	3.3333	1.2472	Q9Y6N9, P22314,	1	1	0.8165	-2.3333	2.71108	0.11338							small protein activating enzyme activity: 0.001308	ligase activity: 0.01329	catalytic activity: 0.04231
741	2	Q13185, P62258,	136.667	4.6428	Q13185, P62258,	1	154.333	10.3387	17.6666	2.69995	0.114162	Emerin_complex_25	0.0312	16	Emerin_complex_25	0.0312	16	protein domain specific binding: 0.0002028	enzyme binding: 0.0003709	phosphoserine binding: 0.00063	phosphoprotein binding: 0.003388	potassium channel regulator activity: 0.005126	histone deacetylase binding: 0.009937	ion channel binding: 0.01157	protein complex binding: 0.02053	protein heterodimerization activity: 0.04915	identical protein binding: 0.06927
1750	2	Q8IY37, O15160,	10.6667	4.6428	Q8IY37, O15160,	1	3	1.633	-7.6667	2.69812	0.114291							RNA polymerase III activity: 0.001357	RNA polymerase I activity: 0.001792	DNA-directed RNA polymerase activity: 0.005367	ATP-dependent helicase activity: 0.01262	protein dimerization activity: 0.0211
1239	2	Q8IWJ2, O60231,	7.6667	2.4944	Q8IWJ2, O60231,	1	3.3333	1.2472	-4.3334	2.69134	0.114773	CF_IIAm_complex_(Cleavage_factor_IIAm_complex)	0.0312	16	CF_IIAm_complex_(Cleavage_factor_IIAm_complex)	0.0312	16	RNA helicase activity: 0.001357	ATP-dependent helicase activity: 0.01262	identical protein binding: 0.06927
1352	2	Q15437, O95487,	48.3333	0.9428	Q15437, O95487,	1	52.6667	2.6247	4.3334	2.69127	0.114778							zinc ion binding: 0.007537	transporter activity: 0.03017
1241	2	Q9Y248, Q9BRT9,	89.6667	3.0912	Q9BRT9, Q9Y248,	1	95.6667	2.357	6	2.67341	0.116059	GINS_complex	0.5	4	GINS_complex	0.5	4
1345	2	Q9H488, Q13423,	9.3333	0.4714	Q9H488, Q13423,	1	5	2.8284	-4.3333	2.61751	0.120201							peptide-O-fucosyltransferase activity: 0.0001454	NAD(P)+ transhydrogenase (AB-specific) activity: 0.0002424	NAD(P)+ transhydrogenase (B-specific) activity: 0.0002424	NAD(P)+ transhydrogenase activity: 0.0003878	fucosyltransferase activity: 0.0007754	NAD binding: 0.006716	NADP binding: 0.006957	transferase activity transferring glycosyl groups: 0.008448	oxidoreductase activity: 0.02867
1877	2	P29803, P10515,	5	2.1602	P29803, P10515,	1	1.6667	0.4714	-3.3333	2.61119	0.120682							dihydrolipoyllysine-residue acetyltransferase activity: 0.0001939	pyruvate dehydrogenase (acetyl-transferring) activity: 0.0003878
983	2	Q9UBZ4, Q6L8Q7,	10	0.8165	Q9UBZ4, Q6L8Q7,	1	13.3333	2.0548	3.3333	2.61114	0.120686							DNA-(apurinic or apyrimidinic site) lyase activity: 0.002276	exonuclease activity: 0.004016	endonuclease activity: 0.006572	hydrolase activity: 0.02899
1552	2	P48730, Q9Y5T5,	12.3333	0.4714	P48730, Q9Y5T5,	1	14.3333	1.2472	2	2.59811	0.121687							tau-protein kinase activity: 0.002179	ubiquitin binding: 0.00739	histone binding: 0.009121	ubiquitin-specific protease activity: 0.009265	cysteine-type endopeptidase activity: 0.009937	ubiquitin thiolesterase activity: 0.01224	transferase activity transferring phosphorus-containing groups: 0.01257	transcription coactivator activity: 0.03209	protein kinase activity: 0.05461	protein serine/threonine kinase activity: 0.06063
177	5	Q9H9H4, Q99816, P54578, Q9GZL7, O14980,	0.3333	0.4714	Q9H9H4, Q99816, P54578, Q9GZL7, O14980,	1	1.3333	0.4714	1	2.5981	0.121688	ESCRT-I_complex::TSG101-VPS37B-VPS28_complex	0.2	4	ESCRT-I_complex::TSG101-VPS37B-VPS28_complex	0.2	4	tRNA guanylyltransferase activity: 0.0007268	proteasome binding: 0.002902	endopeptidase inhibitor activity: 0.01177	Ran GTPase binding: 0.01248	protein binding: 0.01368	calcium-dependent protein binding: 0.01639	ubiquitin binding: 0.01827	ubiquitin-specific protease activity: 0.02284	cysteine-type endopeptidase activity: 0.02447	protein transporter activity: 0.02888	ubiquitin thiolesterase activity: 0.03004	cysteine-type peptidase activity: 0.03452	ubiquitin protein ligase binding: 0.06155	transcription corepressor activity: 0.0647	protein domain specific binding: 0.06729	transporter activity: 0.07202
1242	2	P16989, Q07021,	0.3333	0.4714	P16989, Q07021,	1	1.3333	0.4714	1	2.5981	0.121688	CBF-DNA_complex::p32-CBF-DNA_complex	0.125	4	CBF-DNA_complex::p32-CBF-DNA_complex	0.125	4	adrenergic receptor binding: 0.0001454	transcription corepressor activity: 0.0001866	kininogen binding: 0.0002908	complement component C1q binding: 0.0003393	mitochondrial ribosome binding: 0.0003878	hyaluronic acid binding: 0.003388	Rho GTPase binding: 0.004161	mRNA 3'-UTR binding: 0.004547	protein kinase C binding: 0.006234	single-stranded DNA binding: 0.0107	mRNA binding: 0.01348	double-stranded DNA binding: 0.0152	transcription factor binding: 0.03817
1880	2	P52272, Q9NQC3,	0.3333	0.4714	P52272, Q9NQC3,	1	1.3333	0.4714	1	2.5981	0.121688	Nogo-potassium_channel_complex	0.125	4	Nogo-potassium_channel_complex	0.125	4	protein domain specific binding: 0.0281	nucleotide binding: 0.05475	RNA binding: 0.09431
323	3	Q16630, P33240, P61244,	1.6667	0.4714	Q16630, P33240, P61244,	1	0.6667	0.4714	-1	2.5981	0.121688	MYC-MAX-BLOC1S1_complex	0.1111	3	MYC-MAX-BLOC1S1_complex	0.1111	3	nucleotide binding: 0.002311	RNA binding: 0.007017	transcription cofactor activity: 0.01362	nucleic acid binding: 0.01595	mRNA binding: 0.02009	protein complex binding: 0.03048	protein dimerization activity: 0.03132	transcription coactivator activity: 0.04736	protein heterodimerization activity: 0.07187	protein binding: 0.07615	sequence-specific DNA binding: 0.09445
1363	2	Q07864, P56282,	0.3333	0.4714	Q07864, P56282,	1	1.3333	0.4714	1	2.5981	0.121688	DNA_polymerase_alpha-primase_complex::DNA_synthesome_complex_(13_subunits)::DNA_synthesome_complex_(17_subunits)::DNA_synthesome_core_complex::PCNA-DNA_polymerase_delta_complex::DNA_synthesome_complex_(15_subunits)	0.1053	19	DNA_polymerase_alpha-primase_complex::DNA_synthesome_complex_(13_subunits)::DNA_synthesome_complex_(17_subunits)::DNA_synthesome_core_complex::PCNA-DNA_polymerase_delta_complex::DNA_synthesome_complex_(15_subunits)	0.1053	19	DNA-directed DNA polymerase activity: 7.974e-06	4 iron 4 sulfur cluster binding: 0.006668	DNA binding: 0.01533	chromatin binding: 0.05062	nucleotide binding: 0.05475
1774	2	O15111, Q8IX18,	0.6667	0.4714	O15111, Q8IX18,	1	1.6667	0.4714	1	2.5981	0.121688	ESR1-RELA-BCL3-NCOA3_complex::IKK-alpha--ER-alpha-AIB1_complex	0.1	5	ESR1-RELA-BCL3-NCOA3_complex::IKK-alpha--ER-alpha-AIB1_complex	0.1	5	IkappaB kinase activity: 0.0003393	helicase activity: 0.01061	ATP-dependent helicase activity: 0.01262	ATP binding: 0.0148	protein heterodimerization activity: 0.04915	protein kinase activity: 0.05461	protein homodimerization activity: 0.08226
1292	2	Q9BQE3, Q13509,	2.6667	0.4714	Q9BQE3, Q13509,	1	1.6667	0.4714	-1	2.5981	0.121688	60S_APC_containing_complex	0.0714	7	60S_APC_containing_complex	0.0714	7	structural constituent of cytoskeleton: 6.264e-05	GTPase activity: 0.0003257	GTP binding: 0.0007563	peptide binding: 0.004933	structural molecule activity: 0.02867
1209	2	P39656, Q00325,	0.3333	0.4714	P39656, Q00325,	1	1.3333	0.4714	1	2.5981	0.121688	Oligosaccharyltransferase_complex_(Stt3A_variant)::Oligosaccharyltransferase_complex_(Stt3B_variant)	0.0625	8	Oligosaccharyltransferase_complex_(Stt3A_variant)::Oligosaccharyltransferase_complex_(Stt3B_variant)	0.0625	8	phosphate ion carrier activity: 0.0003393	oligosaccharyl transferase activity: 0.0006785	dolichyl-diphosphooligosaccharide-protein glycotransferase activity: 0.001308	symporter activity: 0.006379
1792	2	O15379, Q02880,	0.6667	0.4714	O15379, Q02880,	1	1.6667	0.4714	1	2.5981	0.121688	NCOR2_complex::SKI-NCOR1-SIN3A-HDAC1_complex::SMAD3-cSKI-SIN3A-HDAC1_complex::SMAD3-SKI-NCOR_complex	0.0556	9	NCOR2_complex::SKI-NCOR1-SIN3A-HDAC1_complex::SMAD3-cSKI-SIN3A-HDAC1_complex::SMAD3-SKI-NCOR_complex	0.0556	9	histone deacetylase binding: 2.481e-05	enzyme binding: 0.0003709	DNA topoisomerase type II (ATP-hydrolyzing) activity: 0.0009691	protein deacetylase activity: 0.002469	chromatin DNA binding: 0.003629	NAD-dependent histone deacetylase activity (H4-K16 specific): 0.003967	NAD-dependent histone deacetylase activity (H3-K18 specific): 0.004112	NAD-dependent histone deacetylase activity (H3-K14 specific): 0.004354	NAD-dependent histone deacetylase activity (H3-K9 specific): 0.004402	histone deacetylase activity: 0.004402	protein kinase C binding: 0.006234	transcription corepressor activity: 0.02697	protein C-terminus binding: 0.02857	hydrolase activity: 0.02899	transcription factor binding: 0.03817	protein heterodimerization activity: 0.04915	chromatin binding: 0.05062
803	2	Q9NS86, P50750,	1.3333	0.4714	Q9NS86, P50750,	1	0.3333	0.4714	-1	2.5981	0.121688	BRD4-P-TEFb_complex::BRD4_complex::P-TEFb-BRD4-TRAP220_complex::Heterotrimeric_complex_(CCNT1,_CDK9,_GRN)::P-TEFb-7SKRNA-HEXIM1_complex::P-TEFb-SKP2_complex::Transcription_elongation_factor_complex_(SUPT5H,_CDK9,_CCNT1)	0.0417	12	BRD4-P-TEFb_complex::BRD4_complex::P-TEFb-BRD4-TRAP220_complex::Heterotrimeric_complex_(CCNT1,_CDK9,_GRN)::P-TEFb-7SKRNA-HEXIM1_complex::P-TEFb-SKP2_complex::Transcription_elongation_factor_complex_(SUPT5H,_CDK9,_CCNT1)	0.0417	12	phosphatidylinositol-5-phosphate binding: 0.0004362	phosphatidylinositol-4-phosphate binding: 0.0009207	snRNA binding: 0.001018	phosphatidylinositol-3-phosphate binding: 0.001647	RNA polymerase II carboxy-terminal domain kinase activity: 0.002856	cyclin-dependent protein serine/threonine kinase activity: 0.005801	ATP binding: 0.0148	transcription regulatory region DNA binding: 0.02683	catalytic activity: 0.04231	chromatin binding: 0.05062	GTP binding: 0.05351	protein kinase activity: 0.05461
186	8	O60493, Q9Y3A5, O75152, P23284, O43615, P30405, P29558, Q8IWZ8,	1.6667	0.4714	O60493, Q9Y3A5, O75152, P23284, O43615, P30405, P29558, Q8IWZ8,	1	0.6667	0.4714	-1	2.5981	0.121688	TIM_(TIMM17ab,_TIMM23,_TIMM44)_complex,_mitochondrial	0.0312	4	TIM_(TIMM17ab,_TIMM23,_TIMM44)_complex,_mitochondrial	0.0312	4	peptidyl-prolyl cis-trans isomerase activity: 0.0002626	protein binding: 0.001041	P-P-bond-hydrolysis-driven protein transmembrane transporter activity: 0.002129	cyclosporin A binding: 0.004828	phosphatidylinositol-3-phosphate binding: 0.006556	rRNA binding: 0.01285	ribosome binding: 0.01663	peptide binding: 0.01944	protein phosphatase binding: 0.03459	single-stranded DNA binding: 0.04146	RNA binding: 0.05079	double-stranded DNA binding: 0.05808	unfolded protein binding: 0.06016	microtubule binding: 0.0939
771	2	P98179, O14818,	0.6667	0.4714	P98179, O14818,	1	1.6667	0.4714	1	2.5981	0.121688	20S_proteasome::26S_proteasome::PA700-20S-PA28_complex::PA28-20S_proteasome::PA700_complex::PA28gamma-20S_proteasome::Ubiquilin-proteasome_complex	0.0125	40	20S_proteasome::26S_proteasome::PA700-20S-PA28_complex::PA28-20S_proteasome::PA700_complex::PA28gamma-20S_proteasome::Ubiquilin-proteasome_complex	0.0125	40	ribosomal large subunit binding: 0.0001939	threonine-type endopeptidase activity: 0.00334	nucleotide binding: 0.05475	identical protein binding: 0.06927	RNA binding: 0.09431
578	2	Q9Y5K5, Q9HAV4,	1.3333	0.4714	Q9Y5K5, Q9HAV4,	1	0.3333	0.4714	-1	2.5981	0.121688							proteasome binding: 0.001163	omega peptidase activity: 0.002905	tRNA binding: 0.00474	endopeptidase inhibitor activity: 0.00474	Ran GTPase binding: 0.005029	ubiquitin-specific protease activity: 0.009265	protein transporter activity: 0.01176	ubiquitin thiolesterase activity: 0.01224	RNA binding: 0.09431
742	2	O00308, P62253,	1.6667	0.4714	O00308, P62253,	1	0.6667	0.4714	-1	2.5981	0.121688							ubiquitin-protein ligase activity: 0.000317	RNA polymerase II transcription factor binding: 0.004498	acid-amino acid ligase activity: 0.005752	ubiquitin protein ligase binding: 0.0256	transcription factor binding: 0.03817
832	2	P78549, Q7Z2W4,	1.3333	0.4714	P78549, Q7Z2W4,	1	0.3333	0.4714	-1	2.5981	0.121688							DNA N-glycosylase activity: 0.001986	DNA-(apurinic or apyrimidinic site) lyase activity: 0.002276	NAD+ ADP-ribosyltransferase activity: 0.004305	endonuclease activity: 0.006572	4 iron 4 sulfur cluster binding: 0.006668	double-stranded DNA binding: 0.0152	metal ion binding: 0.01922	catalytic activity: 0.04231	RNA binding: 0.09431
1086	2	Q13228, Q9BVK6,	0.3333	0.4714	Q13228, Q9BVK6,	1	1.3333	0.4714	1	2.5981	0.121688							selenium binding: 0.002034	syntaxin binding: 0.005126
1100	2	Q02388, Q8N9N7,	1.3333	0.4714	Q02388, Q8N9N7,	1	0.3333	0.4714	-1	2.5981	0.121688							serine-type endopeptidase inhibitor activity: 0.01152
1453	2	P46934, P11532,	1.3333	0.4714	P46934, P11532,	1	0.3333	0.4714	-1	2.5981	0.121688							phosphothreonine binding: 0.0002424	beta-2 adrenergic receptor binding: 0.0002908	sodium channel inhibitor activity: 0.00063	phosphoserine binding: 0.00063	RNA polymerase binding: 0.0006785	dystroglycan binding: 0.001163	nitric-oxide synthase binding: 0.001841	proline-rich region binding: 0.002953	myosin binding: 0.003436	vinculin binding: 0.004257	ubiquitin binding: 0.00739	structural constituent of muscle: 0.007679	structural constituent of cytoskeleton: 0.01573	protein domain specific binding: 0.0281	ubiquitin-protein ligase activity: 0.035	actin binding: 0.05292	calcium ion binding: 0.09204
1620	2	Q9UKY1, Q9C0E2,	1.6667	0.4714	Q9UKY1, Q9C0E2,	1	2.6667	0.4714	1	2.5981	0.121688							transcription corepressor activity: 0.02697	protein heterodimerization activity: 0.04915	sequence-specific DNA binding: 0.06516
164	6	Q06265, Q13868, Q01780, Q9NQT5, Q9NQT4, Q9NPD3,	45.6667	0.4714	Q06265, Q9NQT4, Q01780, Q9NQT5, Q13868, Q9NPD3,	1	37.3333	5.5578	-8.3334	2.58776	0.122491	Exosome	0.5455	11	Exosome	0.5455	11	exoribonuclease activity: 8.675e-20	3'-5'-exoribonuclease activity: 1.148e-14	RNA binding: 1.707e-06	AU-rich element binding: 1.235e-05	7S RNA binding: 0.003336	protein binding: 0.005797	3'-5' exonuclease activity: 0.009237	exonuclease activity: 0.01195
1666	58	P62851, P30050, P62854, P62857, P50914, P05388, P62979, P39019, P18621, Q12906, P62424, P61513, P62913, P52272, Q02543, P62847, P62753, P62750, P62280, P25398, P62899, P46782, P62081, P62266, P62241, P36578, P62244, P62263, Q71UM5, P62249, P62917, P62277, P32969, P62906, P39023, P83731, P46777, P23396, P55769, P46778, P61313, P62829, P35268, P15880, P08708, Q15287, P61247, P08865, P18124, P84098,…	20.6667	0.4714	P62851, P30050, P62854, P62857, P50914, P05388, P62979, P39019, P18621, Q12906, P62424, P61513, P62913, P52272, Q02543, P62847, P62753, P62750, P62280, P25398, P62899, P46782, P62081, P62266, P62241, P36578, P62244, P62263, Q71UM5, P62249, P62917, P62277, P32969, P62906, P39023, P83731, P46777, P23396, P55769, P46778, P61313, P84098, P35268, P15880, P08708, Q15287, P61247, P08865, P18124, P62829,…	0.9831	13.3333	4.9216	-7.3334	2.56907	0.12396	40S_ribosomal_subunit,_cytoplasmic::Nop56p-associated_pre-rRNA_complex::TRBP_containing_complex_(DICER,_RPL7A,_EIF6,_MOV10_and_subunits_of_the_60S_ribosomal_particle)::DICER1-NCOA6-AGO2_complex::RNA-induced_silencing_complex,_RISC::TRBP_containing_complex_(DICER,_TRBP,_AGO2,_RPL7A,_EIF6,_MOV10)::FIB-associated_protein_complex	0.4191	129	40S_ribosomal_subunit,_cytoplasmic::Nop56p-associated_pre-rRNA_complex::TRBP_containing_complex_(DICER,_RPL7A,_EIF6,_MOV10_and_subunits_of_the_60S_ribosomal_particle)::DICER1-NCOA6-AGO2_complex::RNA-induced_silencing_complex,_RISC::TRBP_containing_complex_(DICER,_TRBP,_AGO2,_RPL7A,_EIF6,_MOV10)::FIB-associated_protein_complex	0.412	129	structural constituent of ribosome: 1.096e-99	RNA binding: 1.331e-35	rRNA binding: 5.464e-10	mRNA binding: 2.651e-06	fibroblast growth factor binding: 0.005786	laminin receptor activity: 0.008377	5S rRNA binding: 0.008377	mRNA 5'-UTR binding: 0.01525	metal ion binding: 0.02234	translation regulator activity: 0.02338	snoRNA binding: 0.04052	DNA binding: 0.04071	translation initiation factor binding: 0.0431	nucleic acid binding: 0.04892	protein kinase A binding: 0.05076	translation activator activity: 0.05202	protein binding: 0.05283	DNA N-glycosylase activity: 0.05454	nucleotide binding: 0.05704	DNA-(apurinic or apyrimidinic site) lyase activity: 0.062	cysteine-type endopeptidase activator activity involved in apoptotic process: 0.07055	laminin binding: 0.07296	iron-sulfur cluster binding: 0.0906	NF-kappaB binding: 0.09858
852	2	Q8IY37, Q9H0A0,	26.6667	3.2998	Q8IY37, Q9H0A0,	1	32	1.633	5.3333	2.509	0.128855							N-acetyltransferase activity: 0.003291	ATP-dependent helicase activity: 0.01262	ATP binding: 0.0148	molecular_function: 0.06358
1333	2	Q9Y6K5, Q9HD42,	8.6667	1.8856	Q9Y6K5, Q9HD42,	1	12.6667	2.0548	4	2.48425	0.130951	ESCRT-III_complex	0.05	10	ESCRT-III_complex	0.05	10	2'-5'-oligoadenylate synthetase activity: 0.0007269	double-stranded RNA binding: 0.004788	metallopeptidase activity: 0.01046	transferase activity: 0.01195	protein domain specific binding: 0.0281
386	7	Q9BQ15, P63279, P30405, P29558, P82979, Q8IWZ8, Q9Y5M8,	3.3333	2.0548	Q9BQ15, P63279, P30405, P29558, P82979, Q8IWZ8, Q9Y5M8,	1	7.3333	1.8856	4	2.48425	0.130951	MR-UBC9-SRC1_complex::NR3C2-UBC9-SRC-1_complex	0.0357	4	MR-UBC9-SRC1_complex::NR3C2-UBC9-SRC-1_complex	0.0357	4	single-stranded DNA binding: 0.0005894	HLH domain binding: 0.001695	RING-like zinc finger domain binding: 0.002033	RNA binding: 0.003484	cyclosporin A binding: 0.004227	SUMO ligase activity: 0.005741	bHLH transcription factor binding: 0.01076	nucleic acid binding: 0.01114	peptidyl-prolyl cis-trans isomerase activity: 0.02132	double-stranded DNA binding: 0.05121	protein C-terminus binding: 0.09297	protein binding: 0.09537
911	2	P55884, P55010,	8.6667	1.6997	P55884, P55010,	1	5.6667	1.2472	-3	2.46474	0.132636	EIF3_complex_(EIF3A,_EIF3B,_EIF3G,_EIF3I,_EIF3C)::EIF3_complex_(EIF3B,_EIF3G,_EIF3I)::EIF3_core_complex_(EIF3A,_EIF3B,_EIF3G,_EIF3I)::eIF3_complex_(EIF3S6,_EIF3S5,_EIF3S4,_EIF3S3,_EIF3S6IP,_EIF3S2,_EIF3S9,_EIF3S12,__EIF3S10,_EIF3S8,__EIF3S1,_EIF3S7)::EIF3_complex_(EIF3A,_EIF3B,_EIF3G,_EIF3I,_EIF3J)::EIF3_complex_(EIF3B,_EIF3J,_EIF3I)::eIF3_complex_(EIF3S6,_EIF3S5,_EIF3S4,_EIF3S3,_EIF3S6IP,_EIF3S2…	0.0385	13	EIF3_complex_(EIF3A,_EIF3B,_EIF3G,_EIF3I,_EIF3C)::EIF3_complex_(EIF3B,_EIF3G,_EIF3I)::EIF3_core_complex_(EIF3A,_EIF3B,_EIF3G,_EIF3I)::eIF3_complex_(EIF3S6,_EIF3S5,_EIF3S4,_EIF3S3,_EIF3S6IP,_EIF3S2,_EIF3S9,_EIF3S12,__EIF3S10,_EIF3S8,__EIF3S1,_EIF3S7)::EIF3_complex_(EIF3A,_EIF3B,_EIF3G,_EIF3I,_EIF3J)::EIF3_complex_(EIF3B,_EIF3J,_EIF3I)::eIF3_complex_(EIF3S6,_EIF3S5,_EIF3S4,_EIF3S3,_EIF3S6IP,_EIF3S2…	0.0385	13	translation initiation factor activity: 3.176e-05	translation initiation factor binding: 0.00155	protein complex scaffold: 0.004692	translation factor activity nucleic acid binding: 0.005656	GTPase activity: 0.03547	GTP binding: 0.05351	nucleotide binding: 0.05475
1901	2	Q9NZ01, P04843,	51.3333	1.6997	Q9NZ01, P04843,	1	48.3333	1.2472	-3	2.46474	0.132636	Oligosaccharyltransferase_complex_(Stt3A_variant)::Oligosaccharyltransferase_complex_(Stt3B_variant)	0.0625	8	Oligosaccharyltransferase_complex_(Stt3A_variant)::Oligosaccharyltransferase_complex_(Stt3B_variant)	0.0625	8	dolichyl-diphosphooligosaccharide-protein glycotransferase activity: 0.001308	oxidoreductase activity acting on the CH-CH group of donors: 0.00305
242	46	P62851, P50914, Q07020, P05388, P39019, P46782, P62424, P30050, P62913, Q15293, P62854, P62753, P62750, P62899, Q12906, Q12905, Q02543, P62266, P36578, P62244, P62263, Q71UM5, P62249, P62917, P62906, P39023, P83731, P46777, P23396, P61313, P46778, P62829, P35268, P15880, P61247, P18124, P84098, P62701, P62847, P27635, P19338, P62277, P60866, P32969, P26373, Q02878,	5.6667	1.6997	P62851, P50914, Q07020, P05388, P39019, P46782, P62424, P30050, P62913, Q15293, P62854, P62753, P62750, P62899, Q12906, Q12905, Q02543, P62266, P36578, P62244, P62263, Q71UM5, P62249, P62917, P62906, P39023, P83731, P46777, P23396, P61313, P46778, P62829, P35268, P15880, P61247, P18124, P84098, P62701, P62847, P27635, P19338, P62277, P60866, P32969, P26373, Q02878,	1	2.6667	1.2472	-3	2.46474	0.132636	40S_ribosomal_subunit,_cytoplasmic::Nop56p-associated_pre-rRNA_complex::TRBP_containing_complex_(DICER,_RPL7A,_EIF6,_MOV10_and_subunits_of_the_60S_ribosomal_particle)::DICER1-NCOA6-AGO2_complex::RNA-induced_silencing_complex,_RISC::TRBP_containing_complex_(DICER,_TRBP,_AGO2,_RPL7A,_EIF6,_MOV10)::FIB-associated_protein_complex	0.3263	129	40S_ribosomal_subunit,_cytoplasmic::Nop56p-associated_pre-rRNA_complex::TRBP_containing_complex_(DICER,_RPL7A,_EIF6,_MOV10_and_subunits_of_the_60S_ribosomal_particle)::DICER1-NCOA6-AGO2_complex::RNA-induced_silencing_complex,_RISC::TRBP_containing_complex_(DICER,_TRBP,_AGO2,_RPL7A,_EIF6,_MOV10)::FIB-associated_protein_complex	0.3263	129	structural constituent of ribosome: 1.233e-76	RNA binding: 7.364e-35	rRNA binding: 1.25e-08	mRNA binding: 6.646e-07	fibroblast growth factor binding: 0.003708	double-stranded RNA binding: 0.005319	5S rRNA binding: 0.006654	metal ion binding: 0.007701	protein binding: 0.01006	mRNA 5'-UTR binding: 0.01213	ATP binding: 0.01627	translation regulator activity: 0.01863	translation initiation factor binding: 0.03449	protein kinase A binding: 0.04069	translation activator activity: 0.04172	DNA N-glycosylase activity: 0.04376	telomeric DNA binding: 0.04782	DNA-(apurinic or apyrimidinic site) lyase activity: 0.04984	cysteine-type endopeptidase activator activity involved in apoptotic process: 0.05682	iron-sulfur cluster binding: 0.07334	protein kinase binding: 0.07539	NF-kappaB binding: 0.07995	nucleotide binding: 0.09929
594	2	Q15910, Q15022,	0.3333	0.4714	Q15910, Q15022,	1	1	0	0.6667	2.44964	0.133962	EED-EZH-YY1_polycomb_complex::EED-EZH2_complex::Polycomb_repressive_complex_2_(PRC2)::Polycomb_repressive_complex_2_(PRC_2)::Polycomb_repressive_complex_3_(PRC3)::Polycomb_repressive_complex_4_(PRC4)	0.25	8	EED-EZH-YY1_polycomb_complex::EED-EZH2_complex::Polycomb_repressive_complex_2_(PRC2)::Polycomb_repressive_complex_2_(PRC_2)::Polycomb_repressive_complex_3_(PRC3)::Polycomb_repressive_complex_4_(PRC4)	0.25	8	histone methyltransferase activity: 7.826e-07	chromatin binding: 0.0006746	sequence-specific DNA binding: 0.001136	core promoter binding: 0.002663	histone-lysine N-methyltransferase activity: 0.004112	methylated histone residue binding: 0.005367	RNA binding: 0.09431
1130	2	P30101, P11142,	1	0	P30101, P11142,	1	1.6667	0.4714	0.6667	2.44964	0.133962	DNAJB2-HSPA8-PSMA3_complex	0.1667	3	DNAJB2-HSPA8-PSMA3_complex	0.1667	3	phospholipase C activity: 0.00126	ATPase activity coupled: 0.002324	protein disulfide isomerase activity: 0.00276	isomerase activity: 0.003436	protein disulfide oxidoreductase activity: 0.004498	cysteine-type endopeptidase activity: 0.009937	unfolded protein binding: 0.01578
866	2	Q07157, Q9NQC3,	1	0	Q07157, Q9NQC3,	1	0.3333	0.4714	-0.6667	2.44964	0.133962	Nogo-potassium_channel_complex	0.125	4	Nogo-potassium_channel_complex	0.125	4	calmodulin binding: 0.02499	protein domain specific binding: 0.0281	protein C-terminus binding: 0.02857
1768	2	P04908, P62805,	2	0	P04908, P62805,	1	1.3333	0.4714	-0.6667	2.44964	0.133962	ASF1-histone_containing_complex::ASF1-interacting_protein_complex::Chromatin_assembly_complex_(CAF-1_complex)::Histone_H3.1_complex::Histone_H3.3_complex	0.0357	14	ASF1-histone_containing_complex::ASF1-interacting_protein_complex::Chromatin_assembly_complex_(CAF-1_complex)::Histone_H3.1_complex::Histone_H3.3_complex	0.0357	14	protein heterodimerization activity: 0.0006349	DNA binding: 0.01533
1065	2	Q6GQQ9, P20585,	1	0	Q6GQQ9, P20585,	1	0.3333	0.4714	-0.6667	2.44964	0.133962							double-strand/single-strand DNA junction binding: 0.0001939	dinucleotide repeat insertion binding: 0.0001939	dinucleotide insertion or deletion binding: 0.0002424	loop DNA binding: 0.0002908	single guanine insertion binding: 0.0004847	oxidized purine DNA binding: 0.0004847	Y-form DNA binding: 0.0007754	guanine/thymine mispair binding: 0.001018	K63-linked polyubiquitin binding: 0.001114	centromeric DNA binding: 0.001114	mismatched DNA binding: 0.003388	DNA-dependent ATPase activity: 0.008063	ubiquitin-specific protease activity: 0.009265	single-stranded DNA binding: 0.0107	ubiquitin thiolesterase activity: 0.01224	cysteine-type peptidase activity: 0.0141	enzyme binding: 0.0378	protein homodimerization activity: 0.08226
1112	2	P50897, Q9P0T7,	2	0	P50897, Q9P0T7,	1	2.6667	0.4714	0.6667	2.44964	0.133962							palmitoyl-(protein) hydrolase activity: 0.0009691	palmitoyl-CoA hydrolase activity: 0.001599	molecular_function: 0.06358
1807	2	P15924, Q92817,	1	0	P15924, Q92817,	1	0.3333	0.4714	-0.6667	2.44964	0.133962							protein binding bridging: 1.244e-05	structural molecule activity: 0.0002112	scaffold protein binding: 0.004209	protein kinase C binding: 0.006234	structural constituent of cytoskeleton: 0.01573
543	31	O00487, P51665, O00232, P28066, P28062, O14818, P20618, O00231, P35998, P25786, P25787, P25788, P25789, Q15008, P17980, P40306, P28074, P55036, P28070, P28072, Q13200, O43242, Q99436, Q99460, P49720, P49721, P62333, P62195, P60900, P62191, P43686,	0	0	O00487, P51665, O00232, P28066, BORTEZOMIB, P28062, O14818, P20618, P62191, O00231, P35998, P25786, P25787, P25788, P25789, Q15008, P17980, P40306, P28074, P55036, P28070, P28072, Q13200, O43242, Q99436, P49720, P49721, P62333, P62195, P60900, Q99460, P43686,	0.9688	0.6667	0.4714	0.6667	2.44964	0.133962	20S_proteasome::26S_proteasome::PA700-20S-PA28_complex::PA28-20S_proteasome::PA700_complex::PA28gamma-20S_proteasome::Ubiquilin-proteasome_complex	0.6782	40	20S_proteasome::26S_proteasome::PA700-20S-PA28_complex::PA28-20S_proteasome::PA700_complex::PA28gamma-20S_proteasome::Ubiquilin-proteasome_complex	0.657	40	threonine-type endopeptidase activity: 1.681e-37	ATPase activity: 2.917e-08	nucleoside-triphosphatase activity: 1.193e-07	endopeptidase activity: 3.76e-06	enzyme regulator activity: 6.86e-06	protein binding: 0.0002545	lipopolysaccharide binding: 0.0005483	thyrotropin-releasing hormone receptor binding: 0.005237	purine ribonucleoside triphosphate binding: 0.007465	endopeptidase activator activity: 0.01189	peptidase activity: 0.01345	proteasome binding: 0.01773	TBP-class protein binding: 0.03835	metal ion binding: 0.04878	NF-kappaB binding: 0.05542	ATP binding: 0.09326	protein binding bridging: 0.09871
258	60	P62851, P18621, P50914, P62857, P05388, P62979, P39019, Q12906, P62910, P62424, P30050, P62913, P62280, P61513, P62081, P62854, P62753, P62750, P52272, P25398, P62899, P46782, Q02543, P62266, P62241, Q15185, P62244, P62263, Q71UM5, P62249, P62917, P62277, P32969, P62906, P39023, P83731, P46777, P23396, P61313, P46778, P62829, P35268, P15880, P08708, P61247, P08865, P18124, P84098, P62701, P62847,…	0.6667	0.4714	P62851, P18621, P50914, P62857, P05388, P62979, P39019, Q12906, P62910, P62424, P30050, P62913, P62280, P61513, P62081, P62854, P62753, P62750, P52272, P25398, P62899, P46782, Q02543, P62266, P62241, Q15185, P62244, P62263, Q71UM5, P62249, P62917, P62277, P32969, P62906, P39023, P83731, P46777, P23396, P61313, P46778, P62829, P35268, P15880, P08708, P61247, P08865, P18124, P84098, P62701, P62847,…	1	0	0	-0.6667	2.44964	0.133962	40S_ribosomal_subunit,_cytoplasmic::Nop56p-associated_pre-rRNA_complex::TRBP_containing_complex_(DICER,_RPL7A,_EIF6,_MOV10_and_subunits_of_the_60S_ribosomal_particle)::DICER1-NCOA6-AGO2_complex::RNA-induced_silencing_complex,_RISC::TRBP_containing_complex_(DICER,_TRBP,_AGO2,_RPL7A,_EIF6,_MOV10)::FIB-associated_protein_complex	0.4052	129	40S_ribosomal_subunit,_cytoplasmic::Nop56p-associated_pre-rRNA_complex::TRBP_containing_complex_(DICER,_RPL7A,_EIF6,_MOV10_and_subunits_of_the_60S_ribosomal_particle)::DICER1-NCOA6-AGO2_complex::RNA-induced_silencing_complex,_RISC::TRBP_containing_complex_(DICER,_TRBP,_AGO2,_RPL7A,_EIF6,_MOV10)::FIB-associated_protein_complex	0.4052	129	structural constituent of ribosome: 1.157e-106	RNA binding: 8.927e-32	rRNA binding: 6.738e-10	mRNA binding: 3.236e-06	fibroblast growth factor binding: 0.006172	laminin receptor activity: 0.008664	prostaglandin-E synthase activity: 0.008664	5S rRNA binding: 0.008664	mRNA 5'-UTR binding: 0.01577	metal ion binding: 0.01837	telomerase activity: 0.02138	translation regulator activity: 0.02416	DNA binding: 0.03465	translation initiation factor binding: 0.04452	protein kinase A binding: 0.05241	translation activator activity: 0.05372	DNA N-glycosylase activity: 0.05631	DNA-(apurinic or apyrimidinic site) lyase activity: 0.064	cysteine-type endopeptidase activator activity involved in apoptotic process: 0.0728	laminin binding: 0.07528	protein binding: 0.08227	iron-sulfur cluster binding: 0.09341
441	60	P62851, P30050, P50914, P62857, Q07020, P05388, P62979, P39019, P18621, Q12906, P62910, P62424, P61513, P62913, P62280, Q02543, P05387, P62753, P62750, P25398, P62899, P46782, P26373, P62266, P62241, P36578, P62244, P62263, Q71UM5, P62249, P62917, Q96L21, P32969, P62906, P39023, P83731, P62847, P23396, P61313, P46778, P62829, P35268, P15880, P08708, P46777, P61247, P08865, P18124, P84098, P62987,…	0.6667	0.4714	P62851, P30050, P50914, P62857, Q07020, P05388, P62979, P39019, P18621, Q12906, P62910, P62424, P61513, P62913, P62280, Q02543, P05387, P62753, P62750, P25398, P62899, P46782, P26373, P62266, P62241, P36578, P62244, P62263, Q71UM5, P62249, P62917, Q96L21, P32969, P62906, P39023, P83731, P62847, P23396, P61313, P46778, P62829, P35268, P15880, P08708, P46777, P61247, P08865, P18124, P84098, P62987,…	1	0	0	-0.6667	2.44964	0.133962	40S_ribosomal_subunit,_cytoplasmic::Nop56p-associated_pre-rRNA_complex::TRBP_containing_complex_(DICER,_RPL7A,_EIF6,_MOV10_and_subunits_of_the_60S_ribosomal_particle)::DICER1-NCOA6-AGO2_complex::RNA-induced_silencing_complex,_RISC::TRBP_containing_complex_(DICER,_TRBP,_AGO2,_RPL7A,_EIF6,_MOV10)::FIB-associated_protein_complex	0.4052	129	40S_ribosomal_subunit,_cytoplasmic::Nop56p-associated_pre-rRNA_complex::TRBP_containing_complex_(DICER,_RPL7A,_EIF6,_MOV10_and_subunits_of_the_60S_ribosomal_particle)::DICER1-NCOA6-AGO2_complex::RNA-induced_silencing_complex,_RISC::TRBP_containing_complex_(DICER,_TRBP,_AGO2,_RPL7A,_EIF6,_MOV10)::FIB-associated_protein_complex	0.4052	129	structural constituent of ribosome: 2.437e-113	RNA binding: 8.927e-32	rRNA binding: 6.738e-10	mRNA binding: 3.236e-06	fibroblast growth factor binding: 0.006172	laminin receptor activity: 0.008664	5S rRNA binding: 0.008664	mRNA 5'-UTR binding: 0.01577	metal ion binding: 0.01837	translation regulator activity: 0.02416	DNA binding: 0.03465	translation initiation factor binding: 0.04452	protein kinase A binding: 0.05241	translation activator activity: 0.05372	DNA N-glycosylase activity: 0.05631	DNA-(apurinic or apyrimidinic site) lyase activity: 0.064	cysteine-type endopeptidase activator activity involved in apoptotic process: 0.0728	laminin binding: 0.07528	iron-sulfur cluster binding: 0.09341	protein binding: 0.0949
1726	60	P62851, P18621, P62854, P62857, P50914, P05388, P62979, P39019, Q12906, P62910, P62424, P46776, P61513, P62913, P62280, P30050, P62847, P62753, P62750, P25398, P62899, P46782, Q02543, P62266, P62241, P36578, P62244, P62263, Q71UM5, P62249, P62917, P62277, P32969, P62906, P39023, P83731, P46777, P23396, P61313, P46778, P62829, P35268, P15880, P08708, P61247, P08865, P18124, P84098, P62987, P27635,…	0.6667	0.4714	P62851, P30050, P50914, P62857, Q07020, P05388, P62979, P39019, P18621, Q12906, P62910, P62424, P61513, P62913, P62280, Q02543, P05387, P62753, P62750, P25398, P62899, P46782, P26373, P62266, P62241, P36578, P62244, P62263, Q71UM5, P62249, P62917, Q96L21, P32969, P62906, P39023, P83731, P62847, P23396, P61313, P46778, P62829, P35268, P15880, P08708, P46777, P61247, P08865, P18124, P84098, P62987,…	0.9669	0	0	-0.6667	2.44964	0.133962	40S_ribosomal_subunit,_cytoplasmic::Nop56p-associated_pre-rRNA_complex::TRBP_containing_complex_(DICER,_RPL7A,_EIF6,_MOV10_and_subunits_of_the_60S_ribosomal_particle)::DICER1-NCOA6-AGO2_complex::RNA-induced_silencing_complex,_RISC::TRBP_containing_complex_(DICER,_TRBP,_AGO2,_RPL7A,_EIF6,_MOV10)::FIB-associated_protein_complex	0.4052	129	40S_ribosomal_subunit,_cytoplasmic::Nop56p-associated_pre-rRNA_complex::TRBP_containing_complex_(DICER,_RPL7A,_EIF6,_MOV10_and_subunits_of_the_60S_ribosomal_particle)::DICER1-NCOA6-AGO2_complex::RNA-induced_silencing_complex,_RISC::TRBP_containing_complex_(DICER,_TRBP,_AGO2,_RPL7A,_EIF6,_MOV10)::FIB-associated_protein_complex	0.4052	129	structural constituent of ribosome: 2.437e-113	RNA binding: 8.927e-32	rRNA binding: 6.738e-10	mRNA binding: 3.236e-06	fibroblast growth factor binding: 0.006172	laminin receptor activity: 0.008664	5S rRNA binding: 0.008664	mRNA 5'-UTR binding: 0.01577	metal ion binding: 0.01837	translation regulator activity: 0.02416	DNA binding: 0.03465	translation initiation factor binding: 0.04452	protein kinase A binding: 0.05241	translation activator activity: 0.05372	DNA N-glycosylase activity: 0.05631	DNA-(apurinic or apyrimidinic site) lyase activity: 0.064	cysteine-type endopeptidase activator activity involved in apoptotic process: 0.0728	laminin binding: 0.07528	protein binding: 0.08227	iron-sulfur cluster binding: 0.09341
488	44	P62851, P50914, Q07020, O95202, P62424, P30050, P62913, P52272, Q02543, P62854, P62753, P62750, P62899, Q12906, Q12905, P26373, P62266, P36578, P62244, P62263, Q71UM5, P62249, P62917, P62906, P39023, P83731, P46777, P23396, P61313, P46778, P62829, P35268, P15880, P61247, P18124, O60506, P84098, P62701, P27635, P19338, P62277, P60866, P32969, Q02878,	0	0	P62851, P50914, Q07020, O95202, P62424, P30050, P62913, P52272, Q02543, P62854, P62753, P62750, P62899, Q12906, Q12905, P26373, P62266, P36578, P62244, P62263, Q71UM5, P62249, P62917, P62906, P39023, P83731, P46777, P23396, P61313, P46778, P62829, P35268, P15880, P61247, P18124, O60506, P84098, P62701, P27635, P19338, P62277, P60866, P32969, Q02878,	1	0.6667	0.4714	0.6667	2.44964	0.133962	40S_ribosomal_subunit,_cytoplasmic::Nop56p-associated_pre-rRNA_complex::TRBP_containing_complex_(DICER,_RPL7A,_EIF6,_MOV10_and_subunits_of_the_60S_ribosomal_particle)::DICER1-NCOA6-AGO2_complex::RNA-induced_silencing_complex,_RISC::TRBP_containing_complex_(DICER,_TRBP,_AGO2,_RPL7A,_EIF6,_MOV10)::FIB-associated_protein_complex	0.2962	129	40S_ribosomal_subunit,_cytoplasmic::Nop56p-associated_pre-rRNA_complex::TRBP_containing_complex_(DICER,_RPL7A,_EIF6,_MOV10_and_subunits_of_the_60S_ribosomal_particle)::DICER1-NCOA6-AGO2_complex::RNA-induced_silencing_complex,_RISC::TRBP_containing_complex_(DICER,_TRBP,_AGO2,_RPL7A,_EIF6,_MOV10)::FIB-associated_protein_complex	0.2962	129	structural constituent of ribosome: 3.231e-67	RNA binding: 5.191e-36	rRNA binding: 9.934e-09	mRNA binding: 1.163e-05	double-stranded RNA binding: 0.004885	protein binding: 0.005006	5S rRNA binding: 0.006366	metal ion binding: 0.009932	mRNA 5'-UTR binding: 0.01161	translation regulator activity: 0.01783	ATP binding: 0.02018	nucleotide binding: 0.0272	protein kinase A binding: 0.03899	translation activator activity: 0.03998	DNA N-glycosylase activity: 0.04194	telomeric DNA binding: 0.04584	DNA-(apurinic or apyrimidinic site) lyase activity: 0.04778	poly(A) RNA binding: 0.05163	cysteine-type endopeptidase activator activity involved in apoptotic process: 0.05449	iron-sulfur cluster binding: 0.07039	NF-kappaB binding: 0.07677	fibroblast growth factor binding: 0.08037
806	2	P13489, P02452,	0.6667	0.4714	P13489, P02452,	1	0	0	-0.6667	2.44964	0.133962	ITGA11-ITGB1-COL1A1_complex	0.1667	3	ITGA11-ITGB1-COL1A1_complex	0.1667	3	ribonuclease inhibitor activity: 0.0005331	platelet-derived growth factor binding: 0.001066	extracellular matrix structural constituent: 0.00816	identical protein binding: 0.06927
908	2	Q9Y490, P05556,	0	0	Q9Y490, P05556,	1	0.6667	0.4714	0.6667	2.44964	0.133962	ITGB1-RAP1A-PKD1_complex	0.1667	3	ITGB1-RAP1A-PKD1_complex	0.1667	3	actin binding: 0.000739	LIM domain binding: 0.001502	alpha-actinin binding: 0.002373	fibronectin binding: 0.002518	laminin binding: 0.002711	insulin receptor binding: 0.003871	vinculin binding: 0.004257	virus receptor activity: 0.004305	peptide binding: 0.004933	glycoprotein binding: 0.005608	collagen binding: 0.008784	protease binding: 0.01037	integrin binding: 0.01329	structural constituent of cytoskeleton: 0.01573	receptor activity: 0.02612	protein domain specific binding: 0.0281	protein kinase binding: 0.04735	protein heterodimerization activity: 0.04915
471	3	Q92925, Q8WVJ2, Q96EB6,	0	0	Q92925, Q8WVJ2, Q96EB6,	1	0.6667	0.4714	0.6667	2.44964	0.133962	FOXO1-FHL2-SIRT1_complex	0.1111	3	FOXO1-FHL2-SIRT1_complex	0.1111	3	HLH domain binding: 0.0007269	NAD-dependent protein deacetylase activity: 0.0009448	NAD-dependent histone deacetylase activity: 0.001235	deacetylase activity: 0.001526	mitogen-activated protein kinase binding: 0.002686	NAD+ binding: 0.00341	protein deacetylase activity: 0.0037	bHLH transcription factor binding: 0.00464	NAD+ ADP-ribosyltransferase activity: 0.006444	histone deacetylase activity: 0.006589	NAD-dependent histone deacetylase activity (H3-K9 specific): 0.006589	p53 binding: 0.01298	histone binding: 0.01362	transcription corepressor activity: 0.0399	protein domain specific binding: 0.04155	protein C-terminus binding: 0.04224	transcription coactivator activity: 0.04736	enzyme binding: 0.05561	protein binding: 0.07615
1894	2	O43298, P60842,	0.6667	0.4714	O43298, P60842,	1	0	0	-0.6667	2.44964	0.133962	MNK1-eIF4F_complex	0.1	5	MNK1-eIF4F_complex	0.1	5	RNA cap binding: 0.002131	translation factor activity nucleic acid binding: 0.005656	helicase activity: 0.01061	translation initiation factor activity: 0.01123	ATP-dependent helicase activity: 0.01262	mRNA binding: 0.01348
1677	20	P67809, Q00839, Q04837, Q15029, P68104, Q07955, O75533, Q15459, P62314, P61978, O43390, Q6P2Q9, P62316, P26368, P09661, Q01081, O75643, Q9UMS4, O43290, P52272,	0.6667	0.4714	P67809, Q00839, Q04837, Q15029, P68104, Q07955, O75533, Q15459, P62314, P61978, O43390, Q6P2Q9, P62316, P26368, P09661, Q01081, O75643, Q9UMS4, O43290, P52272,	1	0	0	-0.6667	2.44964	0.133962	(E.F.G)_complex::12S_U11_snRNP::6S_methyltransferase_and_RG-containing_Sm_proteins_complex::20S_methylosome-SmD_complex::20S_methylosome_and_RG-containing_Sm_protein_complex::6S_methyltransferase_complex::JBP1-pICln_complex::SMN_complex,_U7_snRNA_specific::20S_methyltransferase_complex::AR_coactivator_complex::17S_U2_snRNP::SF3A1-SF3A2-SF3A3_complex::SF3b_complex::Exon_junction_complex::SRm160/30…	0.0737	245	(E.F.G)_complex::12S_U11_snRNP::6S_methyltransferase_and_RG-containing_Sm_proteins_complex::20S_methylosome-SmD_complex::20S_methylosome_and_RG-containing_Sm_protein_complex::6S_methyltransferase_complex::JBP1-pICln_complex::SMN_complex,_U7_snRNA_specific::20S_methyltransferase_complex::AR_coactivator_complex::17S_U2_snRNP::SF3A1-SF3A2-SF3A3_complex::SF3b_complex::Exon_junction_complex::SRm160/30…	0.0737	245	RNA binding: 1.815e-11	protein binding: 3.484e-08	RS domain binding: 5.113e-05	single-stranded DNA binding: 0.0001601	nucleotide binding: 0.0001779	U5 snRNA binding: 0.001936	ubiquitin-ubiquitin ligase activity: 0.01199	U6 snRNA binding: 0.01293	C2H2 zinc finger domain binding: 0.01905	ATP-dependent RNA helicase activity: 0.03874	translation elongation factor activity: 0.03874	GTPase activity: 0.04461	RNA polymerase II core promoter proximal region sequence-specific DNA binding: 0.05981	chromatin binding: 0.07986	GTP binding: 0.08703	helicase activity: 0.09639
648	2	Q9NUL7, Q12905,	0.6667	0.4714	Q9NUL7, Q12905,	1	0	0	-0.6667	2.44964	0.133962	DNA-PK-Ku-eIF2-NF90-NF45_complex	0.0625	8	DNA-PK-Ku-eIF2-NF90-NF45_complex	0.0625	8	double-stranded RNA binding: 0.004788	transferase activity: 0.01195	ATP-dependent helicase activity: 0.01262	ATP binding: 0.0148	RNA binding: 0.09431
1867	2	Q96TC7, Q12906,	0.6667	0.4714	Q96TC7, Q12906,	1	0	0	-0.6667	2.44964	0.133962	DNA-PK-Ku-eIF2-NF90-NF45_complex	0.0625	8	DNA-PK-Ku-eIF2-NF90-NF45_complex	0.0625	8	double-stranded RNA binding: 0.004788	RNA binding: 0.09431
101	6	O75152, P23284, O43615, P30405, P29558, Q8IWZ8,	0	0	O75152, P23284, O43615, P30405, P29558, Q8IWZ8,	1	0.6667	0.4714	0.6667	2.44964	0.133962	TIM_(TIMM17ab,_TIMM23,_TIMM44)_complex,_mitochondrial	0.0417	4	TIM_(TIMM17ab,_TIMM23,_TIMM44)_complex,_mitochondrial	0.0417	4	peptidyl-prolyl cis-trans isomerase activity: 0.0001415	P-P-bond-hydrolysis-driven protein transmembrane transporter activity: 0.001598	cyclosporin A binding: 0.003625	protein binding: 0.005797	peptide binding: 0.01465	RNA binding: 0.03012	single-stranded DNA binding: 0.03143	double-stranded DNA binding: 0.04423	unfolded protein binding: 0.04584
1576	2	Q7Z434, Q14254,	0	0	Q7Z434, Q14254,	1	0.6667	0.4714	0.6667	2.44964	0.133962	CAS-SRC-FAK_complex::Polycystin-1_multiprotein_complex_(ACTN1,_CDH1,_SRC,_JUP,_VCL,_CTNNB1,_PXN,_BCAR1,_PKD1,_PTK2,_TLN1)::Polycystin-1-E-cadherin-beta-catenin_complex::Polycystin-1-E-cadherin-beta-catenin-Flotillin-2_complex::PXN-ITGB5-PTK2_complex	0.0385	13	CAS-SRC-FAK_complex::Polycystin-1_multiprotein_complex_(ACTN1,_CDH1,_SRC,_JUP,_VCL,_CTNNB1,_PXN,_BCAR1,_PKD1,_PTK2,_TLN1)::Polycystin-1-E-cadherin-beta-catenin_complex::Polycystin-1-E-cadherin-beta-catenin-Flotillin-2_complex::PXN-ITGB5-PTK2_complex	0.0385	13	CARD domain binding: 0.0009207	ionotropic glutamate receptor binding: 0.003001	signal transducer activity: 0.03654	protein kinase binding: 0.04735
529	4	Q92620, O95391, Q9Y333, Q9Y5S9,	0.6667	0.4714	Q92620, O95391, Q9Y333, Q9Y5S9,	1	0	0	-0.6667	2.44964	0.133962	Postsplicing_complex::Upf_complex_(UPF1,_UPF2,_UPF3a)::Upf_complex_(UPF1,_UPF2,_UPF3b)	0.0357	7	Postsplicing_complex::Upf_complex_(UPF1,_UPF2,_UPF3a)::Upf_complex_(UPF1,_UPF2,_UPF3b)	0.0357	7	second spliceosomal transesterification activity: 0.0001939	pre-mRNA 3'-splice site binding: 0.0002908	U6 snRNA binding: 0.002613	helicase activity: 0.02099	ATP-dependent helicase activity: 0.02492	mRNA binding: 0.0266	nucleic acid binding: 0.02949	protein binding: 0.03228	protein kinase binding: 0.09017
1679	7	O60493, O75152, P23284, O43615, P30405, P29558, Q8IWZ8,	0	0	O60493, Q9Y3A5, O75152, P23284, O43615, P30405, P29558, Q8IWZ8,	0.875	0.6667	0.4714	0.6667	2.44964	0.133962	TIM_(TIMM17ab,_TIMM23,_TIMM44)_complex,_mitochondrial	0.0357	4	TIM_(TIMM17ab,_TIMM23,_TIMM44)_complex,_mitochondrial	0.0312	4	peptidyl-prolyl cis-trans isomerase activity: 0.0001975	P-P-bond-hydrolysis-driven protein transmembrane transporter activity: 0.001864	protein binding: 0.002457	cyclosporin A binding: 0.004227	phosphatidylinositol-3-phosphate binding: 0.005741	peptide binding: 0.01705	protein phosphatase binding: 0.0304	single-stranded DNA binding: 0.03647	RNA binding: 0.04008	double-stranded DNA binding: 0.05121	unfolded protein binding: 0.05306
875	2	Q16630, P48729,	0.6667	0.4714	Q16630, P48729,	1	0	0	-0.6667	2.44964	0.133962	CF_IIAm_complex_(Cleavage_factor_IIAm_complex)	0.0312	16	CF_IIAm_complex_(Cleavage_factor_IIAm_complex)	0.0312	16	mRNA binding: 0.01348	protein kinase activity: 0.05461	nucleotide binding: 0.05475	protein serine/threonine kinase activity: 0.06063	RNA binding: 0.09431
1830	8	O60493, O15400, O75152, P23284, O43615, P30405, P29558, Q8IWZ8,	0	0	O60493, Q9Y3A5, O75152, P23284, O43615, P30405, P29558, Q8IWZ8,	0.7656	0.6667	0.4714	0.6667	2.44964	0.133962	TIM_(TIMM17ab,_TIMM23,_TIMM44)_complex,_mitochondrial	0.0312	4	TIM_(TIMM17ab,_TIMM23,_TIMM44)_complex,_mitochondrial	0.0312	4	peptidyl-prolyl cis-trans isomerase activity: 0.0002626	P-P-bond-hydrolysis-driven protein transmembrane transporter activity: 0.002129	SNARE binding: 0.004828	cyclosporin A binding: 0.004828	phosphatidylinositol-3-phosphate binding: 0.006556	protein binding: 0.01133	SNAP receptor activity: 0.01342	peptide binding: 0.01944	protein phosphatase binding: 0.03459	single-stranded DNA binding: 0.04146	RNA binding: 0.05079	double-stranded DNA binding: 0.05808	unfolded protein binding: 0.06016
541	12	P31943, Q96TC7, Q13151, O14979, P52597, O43390, P09651, P14866, P22626, Q14103, P52272, P26599,	0	0	P31943, Q96TC7, Q13151, O14979, P52597, O43390, P09651, P14866, P22626, Q14103, P52272, P26599,	1	0.6667	0.4714	0.6667	2.44964	0.133962	p23_protein_complex	0.0278	3	p23_protein_complex	0.0278	3	nucleotide binding: 9.86e-17	RNA binding: 4.99e-14	nucleic acid binding: 0.0001094	single-stranded RNA binding: 0.0003041	single-stranded telomeric DNA binding: 0.001163	poly(G) RNA binding: 0.001743	single-stranded DNA binding: 0.001804	pre-mRNA intronic binding: 0.002323	poly-pyrimidine tract binding: 0.00348	protein binding: 0.004098	pre-mRNA binding: 0.006363	AU-rich element binding: 0.01094	telomeric DNA binding: 0.01294	poly(U) RNA binding: 0.0135	poly(A) RNA binding: 0.01464	double-stranded DNA binding: 0.08448
981	2	Q53EL6, P55055,	0.6667	0.4714	Q53EL6, P55055,	1	0	0	-0.6667	2.44964	0.133962	Emerin_complex_52	0.0217	23	Emerin_complex_52	0.0217	23	sequence-specific transcription regulatory region DNA binding RNA polymerase II transcription factor recruiting transcription factor activity: 0.0004847	retinoid X receptor binding: 0.002856	ligand-activated sequence-specific DNA binding RNA polymerase II transcription factor activity: 0.006812	steroid hormone receptor activity: 0.008352	sequence-specific DNA binding: 0.06516	RNA binding: 0.09431
1842	4	Q9BYD6, P52815, Q12906, Q9Y3B7,	0	0	Q9Y3B7, Q8TAE8, P52815, Q12906, Q9BYD6, Q7Z7H8,	0.6667	0.6667	0.4714	0.6667	2.44964	0.133962	DNA-PK-Ku-eIF2-NF90-NF45_complex	0.0312	8	DNA-PK-Ku-eIF2-NF90-NF45_complex	0.0208	8	structural constituent of ribosome: 7.162e-06	RNA binding: 0.0004638	double-stranded RNA binding: 0.009531
1858	5	Q9Y3B7, Q9BYD6, Q8TAE8, Q12906, P52815,	0	0	Q9Y3B7, Q8TAE8, P52815, Q12906, Q9BYD6, Q7Z7H8,	0.8333	0.6667	0.4714	0.6667	2.44964	0.133962	DNA-PK-Ku-eIF2-NF90-NF45_complex	0.025	8	DNA-PK-Ku-eIF2-NF90-NF45_complex	0.0208	8	structural constituent of ribosome: 1.769e-05	RNA binding: 0.001102	double-stranded RNA binding: 0.01188	protein binding: 0.09298
77	8	Q8WU90, Q96J01, Q8NI27, Q86W42, Q13769, Q96FV9, Q6I9Y2, P46939,	0.6667	0.4714	Q8WU90, Q96J01, Q8NI27, Q86W42, Q13769, Q96FV9, Q6I9Y2, P46939,	1	0	0	-0.6667	2.44964	0.133962	NOS3-CAV1-NOSTRIN_complex::UTM-SGCE-DAG1-CAV1-NOS3_complex	0.0208	6	NOS3-CAV1-NOSTRIN_complex::UTM-SGCE-DAG1-CAV1-NOS3_complex	0.0208	6	RNA binding: 3.749e-07	vinculin binding: 0.01681	integrin binding: 0.05107	protein binding: 0.05389
497	6	Q9Y3B7, Q8TAE8, P52815, Q12906, Q9BYD6, Q7Z7H8,	0	0	Q9Y3B7, Q8TAE8, P52815, Q12906, Q9BYD6, Q7Z7H8,	1	0.6667	0.4714	0.6667	2.44964	0.133962	DNA-PK-Ku-eIF2-NF90-NF45_complex	0.0208	8	DNA-PK-Ku-eIF2-NF90-NF45_complex	0.0208	8	structural constituent of ribosome: 3.223e-07	RNA binding: 0.002095	double-stranded RNA binding: 0.01423
281	4	Q14254, O94905, O75955, Q9Y3E5,	0	0	Q14254, O94905, O75955, Q9Y3E5,	1	0.6667	0.4714	0.6667	2.44964	0.133962	CAS-SRC-FAK_complex::Polycystin-1_multiprotein_complex_(ACTN1,_CDH1,_SRC,_JUP,_VCL,_CTNNB1,_PXN,_BCAR1,_PKD1,_PTK2,_TLN1)::Polycystin-1-E-cadherin-beta-catenin_complex::Polycystin-1-E-cadherin-beta-catenin-Flotillin-2_complex::PXN-ITGB5-PTK2_complex	0.0192	13	CAS-SRC-FAK_complex::Polycystin-1_multiprotein_complex_(ACTN1,_CDH1,_SRC,_JUP,_VCL,_CTNNB1,_PXN,_BCAR1,_PKD1,_PTK2,_TLN1)::Polycystin-1-E-cadherin-beta-catenin_complex::Polycystin-1-E-cadherin-beta-catenin-Flotillin-2_complex::PXN-ITGB5-PTK2_complex	0.0192	13	ionotropic glutamate receptor binding: 1.329e-05	aminoacyl-tRNA hydrolase activity: 0.0006784	protein binding: 0.03228
1371	2	P54105, P18669,	0	0	P54105, P18669,	1	0.6667	0.4714	0.6667	2.44964	0.133962	Anti-SMN_protein_complex::Anti-Sm_protein_complex::SMN1-SIP1-SNRP_complex::SMN_complex::SMN_complex_(GEMIN2,5,_SMN)::SMN_complex_(GEMIN5,2,3,4,_SMN)::SMN_complex_(GEMIN5,4,3),_SMN-independent_intermediate::SMN_complex_(GEMIN6,7,_UNRIP),_SMN-independent_intermediate::SMN_containing_complex::PPP4C-PPP4R2-Gemin3-Gemin4_complex::SMN-PolII-RHA_complex	0.0172	29	Anti-SMN_protein_complex::Anti-Sm_protein_complex::SMN1-SIP1-SNRP_complex::SMN_complex::SMN_complex_(GEMIN2,5,_SMN)::SMN_complex_(GEMIN5,2,3,4,_SMN)::SMN_complex_(GEMIN5,4,3),_SMN-independent_intermediate::SMN_complex_(GEMIN6,7,_UNRIP),_SMN-independent_intermediate::SMN_containing_complex::PPP4C-PPP4R2-Gemin3-Gemin4_complex::SMN-PolII-RHA_complex	0.0172	29	bisphosphoglycerate mutase activity: 0.0002424	bisphosphoglycerate 2-phosphatase activity: 0.0002424	phosphoglycerate mutase activity: 0.0002424	protein kinase binding: 0.04735
1609	2	P07910, O60812,	0	0	P07910, O60812,	1	0.6667	0.4714	0.6667	2.44964	0.133962	BAF_complex::Brg1-based_SWI/SNF_chromatin_remodeling_complex::EBAFa_complex::EBAFb_complex::SWI-SNF_chromatin_remodeling-related-BRCA1_complex::PBAF_complex_(Polybromo-_and_BAF_containing_complex)::NUMAC_complex_(nucleosomal_methylation_activator_complex)::p300-CBP-p270-SWI/SNF_complex::p300-CBP-p270_complex::BRG1-SIN3A-HDAC_containing_SWI/SNF_remodeling_complex_I::BRG1-SIN3A_complex::BRG1-associ…	0.0089	56	BAF_complex::Brg1-based_SWI/SNF_chromatin_remodeling_complex::EBAFa_complex::EBAFb_complex::SWI-SNF_chromatin_remodeling-related-BRCA1_complex::PBAF_complex_(Polybromo-_and_BAF_containing_complex)::NUMAC_complex_(nucleosomal_methylation_activator_complex)::p300-CBP-p270-SWI/SNF_complex::p300-CBP-p270_complex::BRG1-SIN3A-HDAC_containing_SWI/SNF_remodeling_complex_I::BRG1-SIN3A_complex::BRG1-associ…	0.0089	56	nucleotide binding: 0.0007927	RNA binding: 0.002461	mRNA binding: 0.01348	identical protein binding: 0.06927
297	4	O60568, P24534, P26641, P10809,	0	0	O60568, P24534, P26641, P10809,	1	0.6667	0.4714	0.6667	2.44964	0.133962	(E.F.G)_complex::12S_U11_snRNP::6S_methyltransferase_and_RG-containing_Sm_proteins_complex::20S_methylosome-SmD_complex::20S_methylosome_and_RG-containing_Sm_protein_complex::6S_methyltransferase_complex::JBP1-pICln_complex::SMN_complex,_U7_snRNA_specific::20S_methyltransferase_complex::AR_coactivator_complex::17S_U2_snRNP::SF3A1-SF3A2-SF3A3_complex::SF3b_complex::Exon_junction_complex::SRm160/30…	0.0041	245	(E.F.G)_complex::12S_U11_snRNP::6S_methyltransferase_and_RG-containing_Sm_proteins_complex::20S_methylosome-SmD_complex::20S_methylosome_and_RG-containing_Sm_protein_complex::6S_methyltransferase_complex::JBP1-pICln_complex::SMN_complex,_U7_snRNA_specific::20S_methyltransferase_complex::AR_coactivator_complex::17S_U2_snRNP::SF3A1-SF3A2-SF3A3_complex::SF3b_complex::Exon_junction_complex::SRm160/30…	0.0041	245	translation elongation factor activity: 2.39e-05	procollagen glucosyltransferase activity: 0.0002908	procollagen-lysine 5-dioxygenase activity: 0.0006784	procollagen galactosyltransferase activity: 0.0008721	DNA replication origin binding: 0.002226	lipopolysaccharide binding: 0.004445	L-ascorbic acid binding: 0.007041	chaperone binding: 0.01277	p53 binding: 0.01723	single-stranded DNA binding: 0.02118	unfolded protein binding: 0.03105	protein binding: 0.03228	iron ion binding: 0.03876	ATPase activity: 0.04104
660	2	Q15637, Q9UPU3,	0	0	Q15637, Q9UPU3,	1	0.6667	0.4714	0.6667	2.44964	0.133962	(E.F.G)_complex::12S_U11_snRNP::6S_methyltransferase_and_RG-containing_Sm_proteins_complex::20S_methylosome-SmD_complex::20S_methylosome_and_RG-containing_Sm_protein_complex::6S_methyltransferase_complex::JBP1-pICln_complex::SMN_complex,_U7_snRNA_specific::20S_methyltransferase_complex::AR_coactivator_complex::17S_U2_snRNP::SF3A1-SF3A2-SF3A3_complex::SF3b_complex::Exon_junction_complex::SRm160/30…	0.002	245	(E.F.G)_complex::12S_U11_snRNP::6S_methyltransferase_and_RG-containing_Sm_proteins_complex::20S_methylosome-SmD_complex::20S_methylosome_and_RG-containing_Sm_protein_complex::6S_methyltransferase_complex::JBP1-pICln_complex::SMN_complex,_U7_snRNA_specific::20S_methyltransferase_complex::AR_coactivator_complex::17S_U2_snRNP::SF3A1-SF3A2-SF3A3_complex::SF3b_complex::Exon_junction_complex::SRm160/30…	0.002	245	neuropeptide receptor activity: 0.0009207	transcription corepressor activity: 0.02697	RNA binding: 0.09431
702	2	Q86XP3, P23352,	0	0	Q86XP3, P23352,	1	0.6667	0.4714	0.6667	2.44964	0.133962	(E.F.G)_complex::12S_U11_snRNP::6S_methyltransferase_and_RG-containing_Sm_proteins_complex::20S_methylosome-SmD_complex::20S_methylosome_and_RG-containing_Sm_protein_complex::6S_methyltransferase_complex::JBP1-pICln_complex::SMN_complex,_U7_snRNA_specific::20S_methyltransferase_complex::AR_coactivator_complex::17S_U2_snRNP::SF3A1-SF3A2-SF3A3_complex::SF3b_complex::Exon_junction_complex::SRm160/30…	0.002	245	(E.F.G)_complex::12S_U11_snRNP::6S_methyltransferase_and_RG-containing_Sm_proteins_complex::20S_methylosome-SmD_complex::20S_methylosome_and_RG-containing_Sm_protein_complex::6S_methyltransferase_complex::JBP1-pICln_complex::SMN_complex,_U7_snRNA_specific::20S_methyltransferase_complex::AR_coactivator_complex::17S_U2_snRNP::SF3A1-SF3A2-SF3A3_complex::SF3b_complex::Exon_junction_complex::SRm160/30…	0.002	245	extracellular matrix structural constituent: 0.00816	serine-type endopeptidase inhibitor activity: 0.01152	ATP-dependent helicase activity: 0.01262	heparin binding: 0.01682	RNA binding: 0.09431
1032	2	O75934, O75962,	0	0	O75934, O75962,	1	0.6667	0.4714	0.6667	2.44964	0.133962	(E.F.G)_complex::12S_U11_snRNP::6S_methyltransferase_and_RG-containing_Sm_proteins_complex::20S_methylosome-SmD_complex::20S_methylosome_and_RG-containing_Sm_protein_complex::6S_methyltransferase_complex::JBP1-pICln_complex::SMN_complex,_U7_snRNA_specific::20S_methyltransferase_complex::AR_coactivator_complex::17S_U2_snRNP::SF3A1-SF3A2-SF3A3_complex::SF3b_complex::Exon_junction_complex::SRm160/30…	0.002	245	(E.F.G)_complex::12S_U11_snRNP::6S_methyltransferase_and_RG-containing_Sm_proteins_complex::20S_methylosome-SmD_complex::20S_methylosome_and_RG-containing_Sm_protein_complex::6S_methyltransferase_complex::JBP1-pICln_complex::SMN_complex,_U7_snRNA_specific::20S_methyltransferase_complex::AR_coactivator_complex::17S_U2_snRNP::SF3A1-SF3A2-SF3A3_complex::SF3b_complex::Exon_junction_complex::SRm160/30…	0.002	245	Rho guanyl-nucleotide exchange factor activity: 0.01281	guanyl-nucleotide exchange factor activity: 0.01592	phospholipid binding: 0.05044	protein serine/threonine kinase activity: 0.06063
1037	2	Q96FV9, Q96NB3,	0.6667	0.4714	Q96FV9, Q96NB3,	1	0	0	-0.6667	2.44964	0.133962	(E.F.G)_complex::12S_U11_snRNP::6S_methyltransferase_and_RG-containing_Sm_proteins_complex::20S_methylosome-SmD_complex::20S_methylosome_and_RG-containing_Sm_protein_complex::6S_methyltransferase_complex::JBP1-pICln_complex::SMN_complex,_U7_snRNA_specific::20S_methyltransferase_complex::AR_coactivator_complex::17S_U2_snRNP::SF3A1-SF3A2-SF3A3_complex::SF3b_complex::Exon_junction_complex::SRm160/30…	0.002	245	(E.F.G)_complex::12S_U11_snRNP::6S_methyltransferase_and_RG-containing_Sm_proteins_complex::20S_methylosome-SmD_complex::20S_methylosome_and_RG-containing_Sm_protein_complex::6S_methyltransferase_complex::JBP1-pICln_complex::SMN_complex,_U7_snRNA_specific::20S_methyltransferase_complex::AR_coactivator_complex::17S_U2_snRNP::SF3A1-SF3A2-SF3A3_complex::SF3b_complex::Exon_junction_complex::SRm160/30…	0.002	245	RNA binding: 0.09431
1214	2	Q92499, Q9Y3I0,	0.6667	0.4714	Q92499, Q9Y3I0,	1	0	0	-0.6667	2.44964	0.133962	(E.F.G)_complex::12S_U11_snRNP::6S_methyltransferase_and_RG-containing_Sm_proteins_complex::20S_methylosome-SmD_complex::20S_methylosome_and_RG-containing_Sm_protein_complex::6S_methyltransferase_complex::JBP1-pICln_complex::SMN_complex,_U7_snRNA_specific::20S_methyltransferase_complex::AR_coactivator_complex::17S_U2_snRNP::SF3A1-SF3A2-SF3A3_complex::SF3b_complex::Exon_junction_complex::SRm160/30…	0.002	245	(E.F.G)_complex::12S_U11_snRNP::6S_methyltransferase_and_RG-containing_Sm_proteins_complex::20S_methylosome-SmD_complex::20S_methylosome_and_RG-containing_Sm_protein_complex::6S_methyltransferase_complex::JBP1-pICln_complex::SMN_complex,_U7_snRNA_specific::20S_methyltransferase_complex::AR_coactivator_complex::17S_U2_snRNP::SF3A1-SF3A2-SF3A3_complex::SF3b_complex::Exon_junction_complex::SRm160/30…	0.002	245	DNA/RNA helicase activity: 4.848e-05	RNA ligase activity: 9.696e-05	RNA ligase (ATP) activity: 9.696e-05	RNA helicase activity: 0.001357	poly(A) RNA binding: 0.002469	nuclease activity: 0.003436	exonuclease activity: 0.004016	vinculin binding: 0.004257	double-stranded RNA binding: 0.004788	transcription cofactor activity: 0.009121	ATP-dependent helicase activity: 0.01262	ATP binding: 0.0148	chromatin binding: 0.05062
1579	2	Q92499, Q02809,	0	0	Q92499, Q02809,	1	0.6667	0.4714	0.6667	2.44964	0.133962	(E.F.G)_complex::12S_U11_snRNP::6S_methyltransferase_and_RG-containing_Sm_proteins_complex::20S_methylosome-SmD_complex::20S_methylosome_and_RG-containing_Sm_protein_complex::6S_methyltransferase_complex::JBP1-pICln_complex::SMN_complex,_U7_snRNA_specific::20S_methyltransferase_complex::AR_coactivator_complex::17S_U2_snRNP::SF3A1-SF3A2-SF3A3_complex::SF3b_complex::Exon_junction_complex::SRm160/30…	0.002	245	(E.F.G)_complex::12S_U11_snRNP::6S_methyltransferase_and_RG-containing_Sm_proteins_complex::20S_methylosome-SmD_complex::20S_methylosome_and_RG-containing_Sm_protein_complex::6S_methyltransferase_complex::JBP1-pICln_complex::SMN_complex,_U7_snRNA_specific::20S_methyltransferase_complex::AR_coactivator_complex::17S_U2_snRNP::SF3A1-SF3A2-SF3A3_complex::SF3b_complex::Exon_junction_complex::SRm160/30…	0.002	245	DNA/RNA helicase activity: 4.848e-05	procollagen-lysine 5-dioxygenase activity: 0.0003393	RNA helicase activity: 0.001357	poly(A) RNA binding: 0.002469	nuclease activity: 0.003436	L-ascorbic acid binding: 0.003533	exonuclease activity: 0.004016	double-stranded RNA binding: 0.004788	transcription cofactor activity: 0.009121	ATP-dependent helicase activity: 0.01262	iron ion binding: 0.01977	chromatin binding: 0.05062	protein homodimerization activity: 0.08226
402	4	O43865, O00762, O15355, Q9UMY4,	0	0	O43865, O00762, O15355, Q9UMY4,	1	0.6667	0.4714	0.6667	2.44964	0.133962	(E.F.G)_complex::12S_U11_snRNP::6S_methyltransferase_and_RG-containing_Sm_proteins_complex::20S_methylosome-SmD_complex::20S_methylosome_and_RG-containing_Sm_protein_complex::6S_methyltransferase_complex::JBP1-pICln_complex::SMN_complex,_U7_snRNA_specific::20S_methyltransferase_complex::AR_coactivator_complex::17S_U2_snRNP::SF3A1-SF3A2-SF3A3_complex::SF3b_complex::Exon_junction_complex::SRm160/30…	0.001	245	(E.F.G)_complex::12S_U11_snRNP::6S_methyltransferase_and_RG-containing_Sm_proteins_complex::20S_methylosome-SmD_complex::20S_methylosome_and_RG-containing_Sm_protein_complex::6S_methyltransferase_complex::JBP1-pICln_complex::SMN_complex,_U7_snRNA_specific::20S_methyltransferase_complex::AR_coactivator_complex::17S_U2_snRNP::SF3A1-SF3A2-SF3A3_complex::SF3b_complex::Exon_junction_complex::SRm160/30…	0.001	245	adenosylhomocysteinase activity: 0.0007753	protein serine/threonine phosphatase activity: 0.01249	phosphatidylinositol binding: 0.02408	protein binding: 0.03228	ubiquitin-protein ligase activity: 0.06753
375	4	P36542, P25705, P06576, P38606,	0.6667	0.4714					-0.6667	2.44964	0.133962	F1F0-ATP_synthase_(EC_3.6.3.14),_mitochondrial	0.1406	16				proton-transporting ATPase activity rotational mechanism: 1.908e-12	proton-transporting ATP synthase activity rotational mechanism: 2.044e-09	transmembrane transporter activity: 7.77e-08	ATPase activity: 4.672e-06	MHC class I protein binding: 7.936e-06	ATP binding: 0.006327	transporter activity: 0.05851
1861	4	P18583, Q12857, Q5SSJ5, Q16629,	0.6667	0.4714					-0.6667	2.44964	0.133962	(E.F.G)_complex::12S_U11_snRNP::6S_methyltransferase_and_RG-containing_Sm_proteins_complex::20S_methylosome-SmD_complex::20S_methylosome_and_RG-containing_Sm_protein_complex::6S_methyltransferase_complex::JBP1-pICln_complex::SMN_complex,_U7_snRNA_specific::20S_methyltransferase_complex::AR_coactivator_complex::17S_U2_snRNP::SF3A1-SF3A2-SF3A3_complex::SF3b_complex::Exon_junction_complex::SRm160/30…	0.001	245				RS domain binding: 0.00213	DNA binding: 0.006649	RNA binding: 0.01334	nucleic acid binding: 0.02949	transcription factor binding: 0.0734
521	4	Q15436, O94855, P53992, O95486,	0.6667	0.4714	Q15436, O94855, P53992, O95486,	1	0	0	-0.6667	2.44964	0.133962							zinc ion binding: 5.675e-05	molecular_function: 0.0001371
662	2	Q00325, P18031,	0	0	Q00325, P18031,	1	0.6667	0.4714	0.6667	2.44964	0.133962							phosphate ion carrier activity: 0.0003393	ephrin receptor binding: 0.003823	insulin receptor binding: 0.003871	receptor tyrosine kinase binding: 0.004836	symporter activity: 0.006379	protein tyrosine phosphatase activity: 0.01386	enzyme binding: 0.0378	protein kinase binding: 0.04735
1205	2	Q8TCC3, Q00325,	0.6667	0.4714	Q8TCC3, Q00325,	1	0	0	-0.6667	2.44964	0.133962							phosphate ion carrier activity: 0.0003393	symporter activity: 0.006379
1335	2	P33527, O15173,	0	0	P33527, O15173,	1	0.6667	0.4714	0.6667	2.44964	0.133962							steroid binding: 0.003533	ATPase activity coupled to transmembrane movement of substances: 0.005174	steroid hormone receptor activity: 0.008352	heme binding: 0.0173	ATPase activity: 0.02096	transporter activity: 0.03017
1421	2	P08729, O94905,	0.6667	0.4714	P08729, O94905,	1	0	0	-0.6667	2.44964	0.133962							structural molecule activity: 0.02867
1508	2	Q14CB8, Q14644,	0.6667	0.4714					-0.6667	2.44964	0.133962							GTPase activator activity: 0.0001192	calcium-release channel activity: 0.0005331	Ras GTPase activator activity: 0.002179	phospholipid binding: 0.05044
1528	2	Q9BV44, Q96KR1,	0.6667	0.4714	Q9BV44, Q96KR1,	1	0	0	-0.6667	2.44964	0.133962							RNA binding: 0.002461	methyltransferase activity: 0.01515
1577	2	Q9NPG3, Q8WXB4,	0.6667	0.4714					-0.6667	2.44964	0.133962							DNA binding: 0.01533
1610	2	P18827, P23526,	33.3333	0.4714	P18827, P23526,	1	34	0	0.6667	2.44964	0.133962							adenosylhomocysteinase activity: 0.0003878	glycoprotein binding: 0.005608	cytoskeletal protein binding: 0.01008	protein C-terminus binding: 0.02857
1305	2	Q86Y82, O95249,	40	2.1602	Q86Y82, O95249,	1	34.6667	3.0912	-5.3333	2.4495	0.133974	SNARE_complex_(HGS,_SNAP25,_STX13)::SNARE_complex_(SNAP25,_VAMP3,_VAMP2,_NAPB,_STX13)::SNARE_complex_(VAMP2,_SNAP25,_STX13)	0.0833	6	SNARE_complex_(HGS,_SNAP25,_STX13)::SNARE_complex_(SNAP25,_VAMP3,_VAMP2,_NAPB,_STX13)::SNARE_complex_(VAMP2,_SNAP25,_STX13)	0.0833	6	SNAP receptor activity: 2.838e-06	SNARE binding: 0.001211
320	4	Q8TCS8, Q9C005, P57740, P49790,	1.6667	0.9428	Q8TCS8, Q9C005, P57740, P49790,	1	3	0	1.3333	2.44945	0.133978	NPC_subcomplex_(NUP98,_NUP107,_NUP133,_NUP160)::Nup_107-160_subcomplex	0.0278	9	NPC_subcomplex_(NUP98,_NUP107,_NUP133,_NUP160)::Nup_107-160_subcomplex	0.0278	9	nucleocytoplasmic transporter activity: 6.059e-06	structural constituent of nuclear pore: 7.282e-06	polyribonucleotide nucleotidyltransferase activity: 0.0002908	poly(G) RNA binding: 0.0005815	protein anchor: 0.001066	miRNA binding: 0.002903	poly(U) RNA binding: 0.004542	3'-5'-exoribonuclease activity: 0.004734	identical protein binding: 0.007192	protein binding: 0.03228	transporter activity: 0.05851
1321	2	Q9UNP9, Q15428,	0	0	Q9UNP9, Q15428,	1	1.3333	0.9428	1.3333	2.44945	0.133978	(E.F.G)_complex::12S_U11_snRNP::6S_methyltransferase_and_RG-containing_Sm_proteins_complex::20S_methylosome-SmD_complex::20S_methylosome_and_RG-containing_Sm_protein_complex::6S_methyltransferase_complex::JBP1-pICln_complex::SMN_complex,_U7_snRNA_specific::20S_methyltransferase_complex::AR_coactivator_complex::17S_U2_snRNP::SF3A1-SF3A2-SF3A3_complex::SF3b_complex::Exon_junction_complex::SRm160/30…	0.0082	245	(E.F.G)_complex::12S_U11_snRNP::6S_methyltransferase_and_RG-containing_Sm_proteins_complex::20S_methylosome-SmD_complex::20S_methylosome_and_RG-containing_Sm_protein_complex::6S_methyltransferase_complex::JBP1-pICln_complex::SMN_complex,_U7_snRNA_specific::20S_methyltransferase_complex::AR_coactivator_complex::17S_U2_snRNP::SF3A1-SF3A2-SF3A3_complex::SF3b_complex::Exon_junction_complex::SRm160/30…	0.0082	245	cyclosporin A binding: 0.001211	nucleic acid binding: 0.005754	peptidyl-prolyl cis-trans isomerase activity: 0.006186	nucleotide binding: 0.05475	RNA binding: 0.09431
392	4	P06703, Q15436, P53992, O95486,	1.3333	0.9428	P06703, Q15436, P53992, O95486,	1	0	0	-1.3333	2.44945	0.133978							zinc ion binding: 5.675e-05	S100 protein binding: 0.00242	ion transmembrane transporter activity: 0.002709	molecular_function: 0.006059	tropomyosin binding: 0.006177	calcium-dependent protein binding: 0.01315
1488	2	P61244, O14686,	2.6667	0.4714	P61244, O14686,	1	4	0.8165	1.3333	2.44943	0.13398	MYC-MAX-BLOC1S1_complex	0.1667	3	MYC-MAX-BLOC1S1_complex	0.1667	3	histone-lysine N-methyltransferase activity: 0.004112	transcription cofactor activity: 0.009121	methyltransferase activity: 0.01515	protein complex binding: 0.02053	protein dimerization activity: 0.0211	transcription regulatory region DNA binding: 0.02683	transcription coactivator activity: 0.03209	protein heterodimerization activity: 0.04915	sequence-specific DNA binding: 0.06516	protein homodimerization activity: 0.08226
152	58	P62851, P18621, P62854, P62857, P50914, P05388, P62979, P39019, P62910, P62424, P30050, P62913, P52272, Q02543, P62847, P62753, P62750, P62899, P46782, P26373, P62266, P62241, P36578, P62244, P62263, Q71UM5, P62249, P62917, P62277, P32969, P62906, P39023, P83731, P46777, P38159, P23396, P61313, P46778, P62829, P35268, P15880, P08708, P61247, P08865, P18124, Q9Y5S9, P84098, P62701, P27635, P62888,…	12	0.8165	P62851, P18621, P62854, P62857, P50914, P05388, P62979, P39019, P62910, P62424, P30050, P62913, P52272, Q02543, P62847, P62753, P62750, P62899, P46782, P26373, P62266, P62241, P36578, P62244, P62263, Q71UM5, P62249, P62917, P62277, P32969, P62906, P39023, P83731, P46777, P38159, P23396, P61313, P46778, P62829, P35268, P15880, P08708, P61247, P08865, P18124, Q9Y5S9, P84098, P62701, P27635, P62888,…	1	13.3333	0.4714	1.3333	2.44943	0.13398	40S_ribosomal_subunit,_cytoplasmic::Nop56p-associated_pre-rRNA_complex::TRBP_containing_complex_(DICER,_RPL7A,_EIF6,_MOV10_and_subunits_of_the_60S_ribosomal_particle)::DICER1-NCOA6-AGO2_complex::RNA-induced_silencing_complex,_RISC::TRBP_containing_complex_(DICER,_TRBP,_AGO2,_RPL7A,_EIF6,_MOV10)::FIB-associated_protein_complex	0.3754	129	40S_ribosomal_subunit,_cytoplasmic::Nop56p-associated_pre-rRNA_complex::TRBP_containing_complex_(DICER,_RPL7A,_EIF6,_MOV10_and_subunits_of_the_60S_ribosomal_particle)::DICER1-NCOA6-AGO2_complex::RNA-induced_silencing_complex,_RISC::TRBP_containing_complex_(DICER,_TRBP,_AGO2,_RPL7A,_EIF6,_MOV10)::FIB-associated_protein_complex	0.3754	129	structural constituent of ribosome: 8.806e-103	RNA binding: 4.695e-34	mRNA binding: 5.607e-09	rRNA binding: 4.104e-08	fibroblast growth factor binding: 0.005786	laminin receptor activity: 0.008377	5S rRNA binding: 0.008377	mRNA 5'-UTR binding: 0.01525	DNA binding: 0.01542	nucleotide binding: 0.01782	metal ion binding: 0.02234	translation regulator activity: 0.02338	translation initiation factor binding: 0.0431	nucleic acid binding: 0.04892	protein kinase A binding: 0.05076	translation activator activity: 0.05202	DNA N-glycosylase activity: 0.05454	DNA-(apurinic or apyrimidinic site) lyase activity: 0.062	protein binding: 0.06944	cysteine-type endopeptidase activator activity involved in apoptotic process: 0.07055	core promoter binding: 0.07176	laminin binding: 0.07296	iron-sulfur cluster binding: 0.0906	NF-kappaB binding: 0.09858
987	2	Q16637, Q9UHI6,	37	4.2426	Q16637, Q9UHI6,	1	29.3333	3.3993	-7.6667	2.44261	0.134584	Anti-SMN_protein_complex::Anti-Sm_protein_complex::SMN1-SIP1-SNRP_complex::SMN_complex::SMN_complex_(GEMIN2,5,_SMN)::SMN_complex_(GEMIN5,2,3,4,_SMN)::SMN_complex_(GEMIN5,4,3),_SMN-independent_intermediate::SMN_complex_(GEMIN6,7,_UNRIP),_SMN-independent_intermediate::SMN_containing_complex::PPP4C-PPP4R2-Gemin3-Gemin4_complex::SMN-PolII-RHA_complex	0.069	29	Anti-SMN_protein_complex::Anti-Sm_protein_complex::SMN1-SIP1-SNRP_complex::SMN_complex::SMN_complex_(GEMIN2,5,_SMN)::SMN_complex_(GEMIN5,2,3,4,_SMN)::SMN_complex_(GEMIN5,4,3),_SMN-independent_intermediate::SMN_complex_(GEMIN6,7,_UNRIP),_SMN-independent_intermediate::SMN_containing_complex::PPP4C-PPP4R2-Gemin3-Gemin4_complex::SMN-PolII-RHA_complex	0.069	29	ATP-dependent RNA helicase activity: 0.004016	ATP-dependent helicase activity: 0.01262	identical protein binding: 0.06927	RNA binding: 0.09431
1003	2	O95573, P11586,	72.6667	6.7987	O95573, P11586,	1	84.3333	4.7842	11.6666	2.4307	0.13565							methylenetetrahydrofolate dehydrogenase [NAD(P)+] activity: 0.0001939	methenyltetrahydrofolate cyclohydrolase activity: 0.001018	methylenetetrahydrofolate dehydrogenase (NADP+) activity: 0.001018	formate-tetrahydrofolate ligase activity: 0.001066	long-chain fatty acid-CoA ligase activity: 0.002179	ATP binding: 0.0148	protein domain specific binding: 0.0281	catalytic activity: 0.04231	protein kinase binding: 0.04735
1501	2	Q9Y6K9, Q6FI81,	16.3333	0.9428	Q9Y6K9, Q6FI81,	1	11	3.7417	-5.3333	2.39398	0.139008	NEMO-HIF2(alpha)-ARNT_complex	0.1667	3	NEMO-HIF2(alpha)-ARNT_complex	0.1667	3	2 iron 2 sulfur cluster binding: 0.002421	iron-sulfur cluster binding: 0.003436	electron carrier activity: 0.01257	methyltransferase activity: 0.01515	metal ion binding: 0.01922	protein domain specific binding: 0.0281	signal transducer activity: 0.03654	protein heterodimerization activity: 0.04915	protein homodimerization activity: 0.08226
312	4	O60832, Q9NX24, Q9Y2X3, Q9NY12,	7.3333	2.6247	O60832, Q9NX24, Q9Y2X3, Q9NY12,	1	3.3333	1.2472	-4	2.38414	0.139928	40S_ribosomal_subunit,_cytoplasmic::Nop56p-associated_pre-rRNA_complex::TRBP_containing_complex_(DICER,_RPL7A,_EIF6,_MOV10_and_subunits_of_the_60S_ribosomal_particle)::DICER1-NCOA6-AGO2_complex::RNA-induced_silencing_complex,_RISC::TRBP_containing_complex_(DICER,_TRBP,_AGO2,_RPL7A,_EIF6,_MOV10)::FIB-associated_protein_complex	0.0019	129	40S_ribosomal_subunit,_cytoplasmic::Nop56p-associated_pre-rRNA_complex::TRBP_containing_complex_(DICER,_RPL7A,_EIF6,_MOV10_and_subunits_of_the_60S_ribosomal_particle)::DICER1-NCOA6-AGO2_complex::RNA-induced_silencing_complex,_RISC::TRBP_containing_complex_(DICER,_TRBP,_AGO2,_RPL7A,_EIF6,_MOV10)::FIB-associated_protein_complex	0.0019	129	snoRNA binding: 3.063e-06	RNA binding: 0.0004638	telomerase activity: 0.001453	pseudouridine synthase activity: 0.004831	cation channel activity: 0.005985
1593	2	P35270, Q9Y5M8,	11.6667	3.2998	P35270, Q9Y5M8,	1	7	0.8165	-4.6667	2.37782	0.140524							sepiapterin reductase activity: 4.848e-05	aldo-keto reductase (NADP) activity: 0.0008238	NADP binding: 0.006957	GTP binding: 0.05351
1208	2	Q99536, P01111,	82.3333	2.6247	Q99536, P01111,	1	87	2.1602	4.6667	2.3778	0.140525	RAF1-RAS_complex,_EGF_induced	0.125	4	RAF1-RAS_complex,_EGF_induced	0.125	4	oxidoreductase activity: 0.02867	GTPase activity: 0.03547	GTP binding: 0.05351
951	2	P20226, O14981,	3	1.633	P20226, O14981,	1	0.6667	0.4714	-2.3333	2.37774	0.140531	TBP-TAF_complex	0.125	4	TBP-TAF_complex	0.125	4	RNA polymerase II repressing transcription factor binding: 0.004547	repressing transcription factor binding: 0.005945	helicase activity: 0.01061	DNA binding: 0.01533	transcription regulatory region DNA binding: 0.02683	transcription factor binding: 0.03817
1636	2	P33897, Q14573,	4	0	P33897, Q14573,	1	1.6667	1.6997	-2.3333	2.37771	0.140534	TRP1-G_alpha-11-IP3R3-CAV1_signaling_complex	0.125	4	TRP1-G_alpha-11-IP3R3-CAV1_signaling_complex	0.125	4	inositol hexakisphosphate binding: 4.848e-05	peroxisomal fatty-acyl-CoA transporter activity: 0.0001454	inositol 1 4 5-trisphosphate-sensitive calcium-release channel activity: 0.0002908	intracellular ligand-gated calcium channel activity: 0.0003878	inositol 1 3 4 5 tetrakisphosphate binding: 0.0007754	inositol 1 4 5 trisphosphate binding: 0.0008238	ATPase activity coupled to transmembrane movement of substances: 0.005174	phosphatidylinositol binding: 0.01219	ATPase activity: 0.02096	transporter activity: 0.03017	enzyme binding: 0.0378	identical protein binding: 0.06927	protein homodimerization activity: 0.08226
973	2	Q17RY0, Q15386,	2.3333	1.6997	Q17RY0, Q15386,	1	0	0	-2.3333	2.37771	0.140534							ubiquitin-protein ligase activity: 0.035	nucleotide binding: 0.05475	RNA binding: 0.09431
175	5	P35244, P27694, P15927, P28340, Q04323,	130.667	7.7172	P35244, P27694, P15927, P28340, Q04323,	1	119	3.7417	-11.6667	2.35614	0.142592	BRD4-RFC_complex::RFC_complex::RFC_complex_(activator_A_1_complex)::RC_complex_(Replication_competent_complex)::CDC2-CCNA2-CDK2_complex::RC_complex_during_G2/M-phase_of_cell_cycle::RC_complex_during_S-phase_of_cell_cycle::CDC2-CCNB1-CCNF_complex::CDC2-CCNB1-PTCH1_complex::RalBP1-CDC2-CCNB1_complex	0.1391	23	BRD4-RFC_complex::RFC_complex::RFC_complex_(activator_A_1_complex)::RC_complex_(Replication_competent_complex)::CDC2-CCNA2-CDK2_complex::RC_complex_during_G2/M-phase_of_cell_cycle::RC_complex_during_S-phase_of_cell_cycle::CDC2-CCNB1-CCNF_complex::CDC2-CCNB1-PTCH1_complex::RalBP1-CDC2-CCNB1_complex	0.1391	23	single-stranded DNA binding: 1.521e-06	K6-linked polyubiquitin binding: 0.0001212	chromatin binding: 0.006234	polyubiquitin binding: 0.00747	3'-5' exonuclease activity: 0.007709	ATPase binding: 0.009622	protein binding: 0.01368	DNA-directed DNA polymerase activity: 0.01402	4 iron 4 sulfur cluster binding: 0.0165	ubiquitin binding: 0.01827	protein phosphatase binding: 0.02191	protein N-terminus binding: 0.0368	nucleic acid binding: 0.04542	ubiquitin protein ligase binding: 0.06155
1180	2	O60271, Q92597,	33.3333	5.2493	O60271, Q92597,	1	41	2.1602	7.6667	2.33935	0.144223	ABIN2-NFKB1-MAP3K8_complex::TNF-alpha/Nf-kappa_B_signaling_complex_(RPL6,_RPL30,_RPS13,_CHUK,_DDX3X,_NFKB2,_NFKBIB,_REL,_IKBKG,_NFKB1,_MAP3K8,_RELB,_GLG1,_NFKBIA,_RELA,_TNIP2,__GTF2I)::I(kappa)B(alpha)-NF(kappa)Bp50-NF(kappa)Bp65_complex::IKB(alpha)-RELA-cREL_complex::IKB(beta)-RELA-cREL_complex::IKBA-NF(kappa)Bp65-NF(kappa)Bp50_complex::TNF-alpha/NF-kappa_B_signaling_complex_(CHUK,_KPNA3,_NFKB2,…	0.0156	32	ABIN2-NFKB1-MAP3K8_complex::TNF-alpha/Nf-kappa_B_signaling_complex_(RPL6,_RPL30,_RPS13,_CHUK,_DDX3X,_NFKB2,_NFKBIB,_REL,_IKBKG,_NFKB1,_MAP3K8,_RELB,_GLG1,_NFKBIA,_RELA,_TNIP2,__GTF2I)::I(kappa)B(alpha)-NF(kappa)Bp50-NF(kappa)Bp65_complex::IKB(alpha)-RELA-cREL_complex::IKB(beta)-RELA-cREL_complex::IKBA-NF(kappa)Bp65-NF(kappa)Bp50_complex::TNF-alpha/NF-kappa_B_signaling_complex_(CHUK,_KPNA3,_NFKB2,…	0.0156	32	mitogen-activated protein kinase p38 binding: 0.0004362	JUN kinase binding: 0.001695	gamma-tubulin binding: 0.003919	kinesin binding: 0.004788	cadherin binding: 0.006572	Rab GTPase binding: 0.008592	microtubule binding: 0.02536
303	4	Q14315, Q12874, P29692, Q13242,	1	0	Q14315, Q12874, P29692, Q13242,	1	2.6667	1.2472	1.6667	2.31463	0.146672	(E.F.G)_complex::12S_U11_snRNP::6S_methyltransferase_and_RG-containing_Sm_proteins_complex::20S_methylosome-SmD_complex::20S_methylosome_and_RG-containing_Sm_protein_complex::6S_methyltransferase_complex::JBP1-pICln_complex::SMN_complex,_U7_snRNA_specific::20S_methyltransferase_complex::AR_coactivator_complex::17S_U2_snRNP::SF3A1-SF3A2-SF3A3_complex::SF3b_complex::Exon_junction_complex::SRm160/30…	0.0041	245	(E.F.G)_complex::12S_U11_snRNP::6S_methyltransferase_and_RG-containing_Sm_proteins_complex::20S_methylosome-SmD_complex::20S_methylosome_and_RG-containing_Sm_protein_complex::6S_methyltransferase_complex::JBP1-pICln_complex::SMN_complex,_U7_snRNA_specific::20S_methyltransferase_complex::AR_coactivator_complex::17S_U2_snRNP::SF3A1-SF3A2-SF3A3_complex::SF3b_complex::Exon_junction_complex::SRm160/30…	0.0041	245	ankyrin binding: 0.006561	translation elongation factor activity: 0.008	translation factor activity nucleic acid binding: 0.01125	cytoskeletal protein binding: 0.01996	nucleic acid binding: 0.02949	protein binding: 0.03228	signal transducer activity: 0.07039
1052	2	Q5VWG9, P49848,	1.6667	1.2472					-1.6667	2.31463	0.146672	DAB_complex::DA_complex::TFIID_subcomplex::Transcription_initiation_factor_complex_(TAF1,_TAF5,_TAF11,_TAF12,_TBP)::Transcription_initiation_factor_complex_(TAF5,_TAF6,_TAF9,_TAF11,_TBP)::TFIID-beta_complex::TFIID_complex::TFIID_complex,_B-cell_specific::TFIIA-TRF2_complex::GCN5-TRRAP_histone_acetyltransferase_complex::STAGA_core_complex_(SPT3-TAF9-GCN5_acetyltransferase_complex)::PCAF_complex::S…	0.0571	35				p53 binding: 0.008688	protein heterodimerization activity: 0.04915
576	2	Q7Z478, Q8NBL1,	3.6667	0.9428	Q7Z478, Q8NBL1,	1	2	0.8165	-1.6667	2.31461	0.146674							UDP-glucosyltransferase activity: 4.848e-05	UDP-xylosyltransferase activity: 0.0001939	glucosyltransferase activity: 0.0001939	ribosomal small subunit binding: 0.001211	translation initiation factor activity: 0.01123	ATP-dependent helicase activity: 0.01262
883	2	Q9UQR1, A6NFI3,	3.6667	0.9428	Q9UQR1, A6NFI3,	1	2	0.8165	-1.6667	2.31461	0.146674							transcription regulatory region sequence-specific DNA binding: 0.005126	double-stranded DNA binding: 0.0152	metal ion binding: 0.01922	sequence-specific DNA binding: 0.06516
494	5	Q96KP1, O60645, O00471, Q96A65, Q8IYI6,	16.3333	1.2472	Q96KP1, O60645, O00471, Q96A65, Q8IYI6,	1	19.3333	1.8856	3	2.29842	0.148309	Sec6/8_exocyst_complex	0.625	8	Sec6/8_exocyst_complex	0.625	8	protein N-terminus binding: 4.261e-06	Ral GTPase binding: 0.001211	PDZ domain binding: 0.02424	protein binding: 0.09298
115	28	P62854, P05388, P39019, P62424, P30050, P62913, P50914, P62753, P62750, Q12906, Q12905, Q9BUJ2, P62266, P36578, P46777, P23396, P61313, P62829, P15880, P61247, P08865, P18124, P68104, P27635, P62888, P62277, P60866, Q02878,	1.3333	1.2472	P62854, P05388, P39019, P62424, P30050, P62913, P50914, P62753, P62750, Q12906, Q12905, Q9BUJ2, P62266, P36578, P46777, P23396, P61313, P62829, P15880, P61247, P08865, P18124, P68104, P27635, P62888, P62277, P60866, Q02878,	1	3.6667	1.2472	2.3334	2.29139	0.149027	40S_ribosomal_subunit,_cytoplasmic::Nop56p-associated_pre-rRNA_complex::TRBP_containing_complex_(DICER,_RPL7A,_EIF6,_MOV10_and_subunits_of_the_60S_ribosomal_particle)::DICER1-NCOA6-AGO2_complex::RNA-induced_silencing_complex,_RISC::TRBP_containing_complex_(DICER,_TRBP,_AGO2,_RPL7A,_EIF6,_MOV10)::FIB-associated_protein_complex	0.2018	129	40S_ribosomal_subunit,_cytoplasmic::Nop56p-associated_pre-rRNA_complex::TRBP_containing_complex_(DICER,_RPL7A,_EIF6,_MOV10_and_subunits_of_the_60S_ribosomal_particle)::DICER1-NCOA6-AGO2_complex::RNA-induced_silencing_complex,_RISC::TRBP_containing_complex_(DICER,_TRBP,_AGO2,_RPL7A,_EIF6,_MOV10)::FIB-associated_protein_complex	0.2018	129	structural constituent of ribosome: 1.377e-42	RNA binding: 7.747e-16	protein binding: 2.527e-08	mRNA binding: 1.171e-06	rRNA binding: 0.0009427	fibroblast growth factor binding: 0.001403	double-stranded RNA binding: 0.002027	protein kinase binding: 0.003921	laminin receptor activity: 0.004059	5S rRNA binding: 0.004059	enzyme binding: 0.01438	protein kinase A binding: 0.02517	DNA N-glycosylase activity: 0.02711	DNA-(apurinic or apyrimidinic site) lyase activity: 0.03095	laminin binding: 0.03666	iron-sulfur cluster binding: 0.04603	NF-kappaB binding: 0.05033	translation elongation factor activity: 0.05339	ribosome binding: 0.05581	endonuclease activity: 0.08448
1048	2	P40222, Q9Y4P8,	0.3333	0.4714	P40222, Q9Y4P8,	1	2.6667	1.6997	2.3334	2.29132	0.149034	TNF-alpha/NF-kappa_B_signaling_complex_10::TNF-alpha/NF-kappa_B_signaling_complex_9	0.0455	11	TNF-alpha/NF-kappa_B_signaling_complex_10::TNF-alpha/NF-kappa_B_signaling_complex_9	0.0455	11	high molecular weight B cell growth factor receptor binding: 4.848e-05	phosphatidylinositol-3 5-bisphosphate binding: 0.001066	phosphatidylinositol-3-phosphate binding: 0.001647	syntaxin binding: 0.005126	cytokine activity: 0.01377
817	2	P57105, P28288,	4	0.8165	P57105, P28288,	1	9	3.7417	5	2.26131	0.152153							type II activin receptor binding: 0.0001454	ATPase activity coupled to transmembrane movement of substances: 0.005174	ATPase activity: 0.02096	protein C-terminus binding: 0.02857	protein homodimerization activity: 0.08226
91	61	P62851, P18621, P62854, P62857, P50914, Q07020, P05388, P62979, P39019, Q12906, P62910, P62424, P61513, P62913, P62280, P30050, P62847, P62753, P62750, P52272, P25398, P62899, P46782, Q02543, P62266, P62241, P36578, P62244, P62263, Q71UM5, P62249, P62917, P24534, Q96L21, P32969, P62906, P39023, P83731, P46777, P23396, P61313, P46778, P62829, P35268, P15880, P08708, P61247, P08865, P18124, P68104,…	11	2.1602	P62851, P18621, P62854, P62857, P50914, Q07020, P05388, P62979, P39019, Q12906, P62910, P62424, P61513, P62913, P62280, P30050, P62847, P62753, P62750, P52272, P25398, P62899, P46782, Q02543, P62266, P62241, P36578, P62244, P62263, Q71UM5, P62249, P62917, P24534, Q96L21, P32969, P62906, P39023, P83731, P46777, P23396, P61313, P46778, P62829, P35268, P15880, P08708, P61247, P08865, P18124, P68104,…	1	8	0.8165	-3	2.25004	0.153347	40S_ribosomal_subunit,_cytoplasmic::Nop56p-associated_pre-rRNA_complex::TRBP_containing_complex_(DICER,_RPL7A,_EIF6,_MOV10_and_subunits_of_the_60S_ribosomal_particle)::DICER1-NCOA6-AGO2_complex::RNA-induced_silencing_complex,_RISC::TRBP_containing_complex_(DICER,_TRBP,_AGO2,_RPL7A,_EIF6,_MOV10)::FIB-associated_protein_complex	0.4129	129	40S_ribosomal_subunit,_cytoplasmic::Nop56p-associated_pre-rRNA_complex::TRBP_containing_complex_(DICER,_RPL7A,_EIF6,_MOV10_and_subunits_of_the_60S_ribosomal_particle)::DICER1-NCOA6-AGO2_complex::RNA-induced_silencing_complex,_RISC::TRBP_containing_complex_(DICER,_TRBP,_AGO2,_RPL7A,_EIF6,_MOV10)::FIB-associated_protein_complex	0.4129	129	structural constituent of ribosome: 1.746e-105	RNA binding: 2.072e-31	rRNA binding: 7.462e-10	mRNA binding: 3.565e-06	fibroblast growth factor binding: 0.006368	translation elongation factor activity: 0.006516	laminin receptor activity: 0.008807	5S rRNA binding: 0.008807	mRNA 5'-UTR binding: 0.01603	metal ion binding: 0.01664	translation regulator activity: 0.02456	DNA binding: 0.03193	protein kinase binding: 0.04454	translation initiation factor binding: 0.04523	protein kinase A binding: 0.05324	translation activator activity: 0.05456	DNA N-glycosylase activity: 0.05719	DNA-(apurinic or apyrimidinic site) lyase activity: 0.06499	protein binding: 0.07334	cysteine-type endopeptidase activator activity involved in apoptotic process: 0.07391	laminin binding: 0.07643	iron-sulfur cluster binding: 0.0948
1887	2	Q07864, Q9NRF9,	15	2.1602	Q07864, Q9NRF9,	1	12	0.8165	-3	2.25004	0.153347	DNA_polymerase_alpha-primase_complex::DNA_synthesome_complex_(13_subunits)::DNA_synthesome_complex_(17_subunits)::DNA_synthesome_core_complex::PCNA-DNA_polymerase_delta_complex::DNA_synthesome_complex_(15_subunits)	0.1053	19	DNA_polymerase_alpha-primase_complex::DNA_synthesome_complex_(13_subunits)::DNA_synthesome_complex_(17_subunits)::DNA_synthesome_core_complex::PCNA-DNA_polymerase_delta_complex::DNA_synthesome_complex_(15_subunits)	0.1053	19	DNA-directed DNA polymerase activity: 7.974e-06	4 iron 4 sulfur cluster binding: 0.006668	protein heterodimerization activity: 0.04915	chromatin binding: 0.05062	nucleotide binding: 0.05475	sequence-specific DNA binding: 0.06516
695	2	P13804, Q00796,	5.3333	0.9428	P13804, Q00796,	1	3.3333	1.2472	-2	2.21568	0.15707							L-iditol 2-dehydrogenase activity: 0.0001939	oxidoreductase activity: 0.0002112	NAD binding: 0.006716	electron carrier activity: 0.01257	flavin adenine dinucleotide binding: 0.0132	carbohydrate binding: 0.01754
1197	2	P36404, P99999,	164.333	0.9428	P36404, P99999,	1	162.333	1.2472	-2	2.21568	0.15707	Apoptosome-procaspase_9_complex	0.1667	3	Apoptosome-procaspase_9_complex	0.1667	3	electron transporter transferring electrons from CoQH2-cytochrome c reductase complex and cytochrome c oxidase complex activity: 0.0001454	GTPase inhibitor activity: 0.002566	protein serine/threonine phosphatase activity: 0.006283	GDP binding: 0.006812	electron carrier activity: 0.01257	heme binding: 0.0173	iron ion binding: 0.01977	GTPase activity: 0.03547	GTP binding: 0.05351
691	2	Q92621, O75528,	17.6667	0.9428	Q92621, O75528,	1	19.6667	1.2472	2	2.21568	0.15707	DAB_complex::DA_complex::TFIID_subcomplex::Transcription_initiation_factor_complex_(TAF1,_TAF5,_TAF11,_TAF12,_TBP)::Transcription_initiation_factor_complex_(TAF5,_TAF6,_TAF9,_TAF11,_TBP)::TFIID-beta_complex::TFIID_complex::TFIID_complex,_B-cell_specific::TFIIA-TRF2_complex::GCN5-TRRAP_histone_acetyltransferase_complex::STAGA_core_complex_(SPT3-TAF9-GCN5_acetyltransferase_complex)::PCAF_complex::S…	0.0143	35	DAB_complex::DA_complex::TFIID_subcomplex::Transcription_initiation_factor_complex_(TAF1,_TAF5,_TAF11,_TAF12,_TBP)::Transcription_initiation_factor_complex_(TAF5,_TAF6,_TAF9,_TAF11,_TBP)::TFIID-beta_complex::TFIID_complex::TFIID_complex,_B-cell_specific::TFIIA-TRF2_complex::GCN5-TRRAP_histone_acetyltransferase_complex::STAGA_core_complex_(SPT3-TAF9-GCN5_acetyltransferase_complex)::PCAF_complex::S…	0.0143	35	structural constituent of nuclear pore: 0.002228	ligand-dependent nuclear receptor binding: 0.00305	histone acetyltransferase activity: 0.005511	ligand-dependent nuclear receptor transcription coactivator activity: 0.005608	protein domain specific binding: 0.0281	transcription coactivator activity: 0.03209
608	2	O95747, Q08AF3,	9.6667	0.9428	O95747, Q08AF3,	1	11.6667	1.2472	2	2.21568	0.15707							ATP binding: 0.0148	magnesium ion binding: 0.03026	protein kinase activity: 0.05461	protein serine/threonine kinase activity: 0.06063
1263	2	Q9UP95, Q04941,	4.6667	0.9428	Q9UP95, Q04941,	1	2.6667	1.2472	-2	2.21568	0.15707							chemokine binding: 0.0002424	potassium:chloride symporter activity: 0.0005816	ion transmembrane transporter activity: 0.001357
310	31	O00487, P51665, O00232, P28066, P28062, O14818, P20618, Q15008, P35998, P25786, O95905, P25788, P25789, P17980, P28074, P55036, P28070, P28072, Q13200, O43242, P25787, Q99436, Q99460, P49720, P49721, P62333, P62195, P60900, P62191, O00231, P43686,	1.6667	0.4714	O00487, P51665, O00232, P28066, BORTEZOMIB, P28062, O14818, P20618, Q15008, P35998, P25786, O95905, P25788, P25789, P17980, P28074, P55036, P28070, P28072, Q13200, O43242, P25787, Q99436, Q99460, P49720, P49721, P62333, P62195, P60900, P62191, O00231, P43686,	0.9688	4.3333	2.0548	2.6666	2.19084	0.159837	20S_proteasome::26S_proteasome::PA700-20S-PA28_complex::PA28-20S_proteasome::PA700_complex::PA28gamma-20S_proteasome::Ubiquilin-proteasome_complex	0.6782	40	20S_proteasome::26S_proteasome::PA700-20S-PA28_complex::PA28-20S_proteasome::PA700_complex::PA28gamma-20S_proteasome::Ubiquilin-proteasome_complex	0.657	40	threonine-type endopeptidase activity: 1.282e-34	ATPase activity: 2.917e-08	nucleoside-triphosphatase activity: 1.193e-07	endopeptidase activity: 3.76e-06	enzyme regulator activity: 6.86e-06	protein binding: 6.236e-05	lipopolysaccharide binding: 0.0005483	thyrotropin-releasing hormone receptor binding: 0.005237	purine ribonucleoside triphosphate binding: 0.007465	endopeptidase activator activity: 0.01189	peptidase activity: 0.01345	proteasome binding: 0.01773	TBP-class protein binding: 0.03835	metal ion binding: 0.04878	NF-kappaB binding: 0.05542	transcription coactivator activity: 0.07679	ATP binding: 0.09326	protein binding bridging: 0.09871
417	4	Q9P253, O75691, P49754, Q9H269,	2.6667	0.9428	Q9P253, O75691, P49754, Q9H269,	1	4.3333	0.9428	1.6666	2.165	0.162789	Class_C_VPS/HOPS_complex::Class_C_Vps_complex_(VPS11,_VPS18,_VPS16)::Class_C_Vps_complex_(VPS11,_VPS18,_STX7)	0.1429	7	Class_C_VPS/HOPS_complex::Class_C_Vps_complex_(VPS11,_VPS18,_VPS16)::Class_C_Vps_complex_(VPS11,_VPS18,_STX7)	0.1429	7	actin filament binding: 0.0317	microtubule binding: 0.04944
655	2	P62913, Q15050,	16.6667	2.4944	P62913, Q15050,	1	21	2.4495	4.3333	2.14688	0.164904	40S_ribosomal_subunit,_cytoplasmic::Nop56p-associated_pre-rRNA_complex::TRBP_containing_complex_(DICER,_RPL7A,_EIF6,_MOV10_and_subunits_of_the_60S_ribosomal_particle)::DICER1-NCOA6-AGO2_complex::RNA-induced_silencing_complex,_RISC::TRBP_containing_complex_(DICER,_TRBP,_AGO2,_RPL7A,_EIF6,_MOV10)::FIB-associated_protein_complex	0.0039	129	40S_ribosomal_subunit,_cytoplasmic::Nop56p-associated_pre-rRNA_complex::TRBP_containing_complex_(DICER,_RPL7A,_EIF6,_MOV10_and_subunits_of_the_60S_ribosomal_particle)::DICER1-NCOA6-AGO2_complex::RNA-induced_silencing_complex,_RISC::TRBP_containing_complex_(DICER,_TRBP,_AGO2,_RPL7A,_EIF6,_MOV10)::FIB-associated_protein_complex	0.0039	129	rRNA binding: 0.003243	structural constituent of ribosome: 0.02414	molecular_function: 0.06358	RNA binding: 0.09431
1532	2	Q9Y696, P09651,	2	1.4142	Q9Y696, P09651,	1	4.3333	1.2472	2.3333	2.1433	0.165325	40S_ribosomal_subunit,_cytoplasmic::Nop56p-associated_pre-rRNA_complex::TRBP_containing_complex_(DICER,_RPL7A,_EIF6,_MOV10_and_subunits_of_the_60S_ribosomal_particle)::DICER1-NCOA6-AGO2_complex::RNA-induced_silencing_complex,_RISC::TRBP_containing_complex_(DICER,_TRBP,_AGO2,_RPL7A,_EIF6,_MOV10)::FIB-associated_protein_complex	0.0039	129	40S_ribosomal_subunit,_cytoplasmic::Nop56p-associated_pre-rRNA_complex::TRBP_containing_complex_(DICER,_RPL7A,_EIF6,_MOV10_and_subunits_of_the_60S_ribosomal_particle)::DICER1-NCOA6-AGO2_complex::RNA-induced_silencing_complex,_RISC::TRBP_containing_complex_(DICER,_TRBP,_AGO2,_RPL7A,_EIF6,_MOV10)::FIB-associated_protein_complex	0.0039	129	voltage-gated chloride channel activity: 0.001502	single-stranded RNA binding: 0.004354	chloride channel activity: 0.006427	single-stranded DNA binding: 0.0107	nucleotide binding: 0.05475	RNA binding: 0.09431
865	2	O60563, P46781,	2.3333	1.8856	O60563, P46781,	1	0	0	-2.3333	2.14329	0.165326	BRD4-P-TEFb_complex::BRD4_complex::P-TEFb-BRD4-TRAP220_complex::Heterotrimeric_complex_(CCNT1,_CDK9,_GRN)::P-TEFb-7SKRNA-HEXIM1_complex::P-TEFb-SKP2_complex::Transcription_elongation_factor_complex_(SUPT5H,_CDK9,_CCNT1)	0.0417	12	BRD4-P-TEFb_complex::BRD4_complex::P-TEFb-BRD4-TRAP220_complex::Heterotrimeric_complex_(CCNT1,_CDK9,_GRN)::P-TEFb-7SKRNA-HEXIM1_complex::P-TEFb-SKP2_complex::Transcription_elongation_factor_complex_(SUPT5H,_CDK9,_CCNT1)	0.0417	12	translation regulator activity: 0.0008238	snRNA binding: 0.001018	rRNA binding: 0.003243	structural constituent of ribosome: 0.02414	transcription regulatory region DNA binding: 0.02683	protein kinase binding: 0.04735	chromatin binding: 0.05062
1589	2	Q96CS3, Q9P035,	12.3333	1.6997	Q96CS3, Q9P035,	1	10	0.8165	-2.3333	2.14324	0.165332							lyase activity: 0.003581	ubiquitin binding: 0.00739	GTPase activator activity: 0.02163	ubiquitin protein ligase binding: 0.0256
1614	2	P39019, P15559,	20	2.1602	P39019, P15559,	1	26.3333	4.6428	6.3333	2.14219	0.165457	40S_ribosomal_subunit,_cytoplasmic::Nop56p-associated_pre-rRNA_complex::TRBP_containing_complex_(DICER,_RPL7A,_EIF6,_MOV10_and_subunits_of_the_60S_ribosomal_particle)::DICER1-NCOA6-AGO2_complex::RNA-induced_silencing_complex,_RISC::TRBP_containing_complex_(DICER,_TRBP,_AGO2,_RPL7A,_EIF6,_MOV10)::FIB-associated_protein_complex	0.0039	129	40S_ribosomal_subunit,_cytoplasmic::Nop56p-associated_pre-rRNA_complex::TRBP_containing_complex_(DICER,_RPL7A,_EIF6,_MOV10_and_subunits_of_the_60S_ribosomal_particle)::DICER1-NCOA6-AGO2_complex::RNA-induced_silencing_complex,_RISC::TRBP_containing_complex_(DICER,_TRBP,_AGO2,_RPL7A,_EIF6,_MOV10)::FIB-associated_protein_complex	0.0039	129	NAD(P)H dehydrogenase (quinone) activity: 0.0003393	superoxide dismutase activity: 0.0009207	cytochrome-b5 reductase activity acting on NAD(P)H: 0.001163	fibroblast growth factor binding: 0.003967	structural constituent of ribosome: 0.02414	protein kinase binding: 0.04735	protein homodimerization activity: 0.08226
960	2	Q99426, P13693,	131	7.7889	Q99426, P13693,	1	120	4.3205	-11	2.13907	0.165826							transcription factor binding: 0.03817	calcium ion binding: 0.09204
1624	2	O43670, Q6PJT7,	20.3333	2.6247	O43670, Q6PJT7,	1	24	1.4142	3.6667	2.13015	0.166889	(E.F.G)_complex::12S_U11_snRNP::6S_methyltransferase_and_RG-containing_Sm_proteins_complex::20S_methylosome-SmD_complex::20S_methylosome_and_RG-containing_Sm_protein_complex::6S_methyltransferase_complex::JBP1-pICln_complex::SMN_complex,_U7_snRNA_specific::20S_methyltransferase_complex::AR_coactivator_complex::17S_U2_snRNP::SF3A1-SF3A2-SF3A3_complex::SF3b_complex::Exon_junction_complex::SRm160/30…	0.002	245	(E.F.G)_complex::12S_U11_snRNP::6S_methyltransferase_and_RG-containing_Sm_proteins_complex::20S_methylosome-SmD_complex::20S_methylosome_and_RG-containing_Sm_protein_complex::6S_methyltransferase_complex::JBP1-pICln_complex::SMN_complex,_U7_snRNA_specific::20S_methyltransferase_complex::AR_coactivator_complex::17S_U2_snRNP::SF3A1-SF3A2-SF3A3_complex::SF3b_complex::Exon_junction_complex::SRm160/30…	0.002	245	heparin binding: 0.01682	metal ion binding: 0.01922	RNA binding: 0.09431
1625	2	O75027, Q9Y5K8,	7	2.4495	O75027, Q9Y5K8,	1	3.3333	1.6997	-3.6667	2.13014	0.166889							ATPase activity coupled to transmembrane movement of substances: 6.664e-06	heme transporter activity: 0.0009207
371	4	Q99733, O00541, P55209, P06748,	2	0.8165	Q99733, O00541, P55209, P06748,	1	4	1.4142	2	2.12133	0.167948	ARF-Mule_complex	0.0833	3	ARF-Mule_complex	0.0833	3	unfolded protein binding: 0.0003722	ribosomal large subunit binding: 0.0003877	Tat protein binding: 0.002033	ribosomal small subunit binding: 0.00242	protein kinase inhibitor activity: 0.006753	NF-kappaB binding: 0.00752	histone binding: 0.01808	protein binding: 0.03228	transcription coactivator activity: 0.06212	protein kinase binding: 0.09017	protein heterodimerization activity: 0.09341
1268	2	Q12965, O60610,	4	0.8165	Q12965, O60610,	1	2	1.4142	-2	2.12133	0.167948	Emerin-actin-NMI-(alphaII)spectrin_complex::Emerin-actin-NMI_complex::Emerin_architectural_complex::Emerin_complex_32::Emerin_regulatory_complex::Emerin_complex_24::Emerin_complex_1::MCM2-MCM4-MCM6-MCM7_complex::MCM2-MCM6-MCM7_complex::MCM4-MCM6-MCM7_complex::MCM_complex::NCOR1_complex	0.0111	45	Emerin-actin-NMI-(alphaII)spectrin_complex::Emerin-actin-NMI_complex::Emerin_architectural_complex::Emerin_complex_32::Emerin_regulatory_complex::Emerin_complex_24::Emerin_complex_1::MCM2-MCM4-MCM6-MCM7_complex::MCM2-MCM6-MCM7_complex::MCM4-MCM6-MCM7_complex::MCM_complex::NCOR1_complex	0.0111	45	profilin binding: 0.001792	ATPase activity coupled: 0.002324	microfilament motor activity: 0.003243	Rho GTPase binding: 0.004161	motor activity: 0.01104	ion channel binding: 0.01157	phosphatidylinositol binding: 0.01219	actin filament binding: 0.01611	calmodulin binding: 0.02499	receptor binding: 0.03901	actin binding: 0.05292	identical protein binding: 0.06927
32	12	P07814, O43324, P22314, P54136, Q13155, Q15046, P56192, Q9P2J5, P47897, P41252, Q12904, P14868,	0	0	P07814, O43324, P22314, P54136, Q13155, Q15046, P56192, Q9P2J5, P47897, P41252, Q12904, P14868,	1	1	0.8165	1	2.12131	0.167951	Multisynthetase_complex	0.9167	11	Multisynthetase_complex	0.9167	11	tRNA binding: 1.455e-08	ATP binding: 8.669e-07	aminoacyl-tRNA ligase activity: 1.25e-06	aminoacyl-tRNA editing activity: 2.314e-05	proline-tRNA ligase activity: 0.0005816	glutamate-tRNA ligase activity: 0.001163	lysine-tRNA ligase activity: 0.001163	RNA stem-loop binding: 0.001743	glutamine-tRNA ligase activity: 0.002033	isoleucine-tRNA ligase activity: 0.002033	leucine-tRNA ligase activity: 0.002323	arginine binding: 0.002612	aspartate-tRNA ligase activity: 0.002612	arginine-tRNA ligase activity: 0.002612	methionine-tRNA ligase activity: 0.002902	protein binding: 0.004098	aminoacylase activity: 0.004924	small protein activating enzyme activity: 0.007799	amino acid binding: 0.02083	ligase activity: 0.07459	cytokine activity: 0.07708
772	2	P68104, P35658,	1	0.8165	P68104, P35658,	1	0	0	-1	2.12131	0.167951	40S_ribosomal_subunit,_cytoplasmic::Nop56p-associated_pre-rRNA_complex::TRBP_containing_complex_(DICER,_RPL7A,_EIF6,_MOV10_and_subunits_of_the_60S_ribosomal_particle)::DICER1-NCOA6-AGO2_complex::RNA-induced_silencing_complex,_RISC::TRBP_containing_complex_(DICER,_TRBP,_AGO2,_RPL7A,_EIF6,_MOV10)::FIB-associated_protein_complex	0.0039	129	40S_ribosomal_subunit,_cytoplasmic::Nop56p-associated_pre-rRNA_complex::TRBP_containing_complex_(DICER,_RPL7A,_EIF6,_MOV10_and_subunits_of_the_60S_ribosomal_particle)::DICER1-NCOA6-AGO2_complex::RNA-induced_silencing_complex,_RISC::TRBP_containing_complex_(DICER,_TRBP,_AGO2,_RPL7A,_EIF6,_MOV10)::FIB-associated_protein_complex	0.0039	129	nucleocytoplasmic transporter activity: 0.002034	translation elongation factor activity: 0.004016	transporter activity: 0.03017	GTPase activity: 0.03547	protein kinase binding: 0.04735	GTP binding: 0.05351
1055	2	P13667, Q12906,	1	0.8165					-1	2.12131	0.167951	DNA-PK-Ku-eIF2-NF90-NF45_complex	0.0625	8				protein disulfide isomerase activity: 0.00276	protein disulfide oxidoreductase activity: 0.004498	double-stranded RNA binding: 0.004788	RNA binding: 0.09431
1862	4	Q9Y4Y9, A9UHW6, P62312, O60231,	1	0.8165					-1	2.12131	0.167951	CF_IIAm_complex_(Cleavage_factor_IIAm_complex)	0.0156	16				RNA binding: 0.0004638	RNA helicase activity: 0.002709	ATP-dependent helicase activity: 0.02492	protein binding: 0.03228	protein C-terminus binding: 0.0555
1759	2	O00217, Q02127,	1	0.8165					-1	2.12131	0.167951	Respiratory_chain_complex_I_(beta_subunit)_mitochondrial::Respiratory_chain_complex_I_(gamma_subunit)_mitochondrial::Respiratory_chain_complex_I_(holoenzyme),_mitochondrial::Respiratory_chain_complex_I_(incomplete_intermediate),_mitochondrial::Respiratory_chain_complex_I_(intermediate_I/200kD_and_III/250kD),_mitochondrial::Respiratory_chain_complex_I_(intermediate_II/230kD),_mitochondrial::Respir…	0.0109	46				dihydroorotate dehydrogenase activity: 0.0001939	dihydroorotate oxidase activity: 0.0002908	ubiquinone binding: 0.0007269	NADH dehydrogenase activity: 0.0009691	oxidoreductase activity acting on NAD(P)H: 0.002276	FMN binding: 0.002615	iron-sulfur cluster binding: 0.003436	NADH dehydrogenase (ubiquinone) activity: 0.005511	4 iron 4 sulfur cluster binding: 0.006668	drug binding: 0.008111
1797	2	Q9Y2L8, Q13769,	1	0.8165					-1	2.12131	0.167951	(E.F.G)_complex::12S_U11_snRNP::6S_methyltransferase_and_RG-containing_Sm_proteins_complex::20S_methylosome-SmD_complex::20S_methylosome_and_RG-containing_Sm_protein_complex::6S_methyltransferase_complex::JBP1-pICln_complex::SMN_complex,_U7_snRNA_specific::20S_methyltransferase_complex::AR_coactivator_complex::17S_U2_snRNP::SF3A1-SF3A2-SF3A3_complex::SF3b_complex::Exon_junction_complex::SRm160/30…	0.002	245				RNA binding: 0.09431
466	4	Q9BRJ2, Q9BZE1, Q96A35, Q4U2R6,	1	0.8165					-1	2.12131	0.167951							structural constituent of ribosome: 2.201e-08
1338	2	Q5SRD1, Q96CS3,	0	0	Q5SRD1, Q96CS3,	1	1	0.8165	1	2.12131	0.167951							P-P-bond-hydrolysis-driven protein transmembrane transporter activity: 0.0005331	ubiquitin binding: 0.00739	ubiquitin protein ligase binding: 0.0256	molecular_function: 0.06358
1591	2	Q9BTF0, Q9NXH9,	0	0	Q9BTF0, Q9NXH9,	1	1	0.8165	1	2.12131	0.167951							tRNA (guanine-N2-)-methyltransferase activity: 0.0003878	RNA binding: 0.002461	tRNA binding: 0.00474	methyltransferase activity: 0.01515
1808	2	Q9Y5M8, Q969X1,	1	0.8165	Q9Y5M8, Q969X1,	1	0	0	-1	2.12131	0.167951							GTP binding: 0.05351
218	6	P62841, Q16540, P09001, Q9BYD3, Q5T653, P62269,	12	2.1602	P62841, Q16540, P09001, Q9BYD3, Q5T653, P62269,	1	14.6667	0.4714	2.6667	2.089	0.171913	40S_ribosomal_subunit,_cytoplasmic::Nop56p-associated_pre-rRNA_complex::TRBP_containing_complex_(DICER,_RPL7A,_EIF6,_MOV10_and_subunits_of_the_60S_ribosomal_particle)::DICER1-NCOA6-AGO2_complex::RNA-induced_silencing_complex,_RISC::TRBP_containing_complex_(DICER,_TRBP,_AGO2,_RPL7A,_EIF6,_MOV10)::FIB-associated_protein_complex	0.0052	129	40S_ribosomal_subunit,_cytoplasmic::Nop56p-associated_pre-rRNA_complex::TRBP_containing_complex_(DICER,_RPL7A,_EIF6,_MOV10_and_subunits_of_the_60S_ribosomal_particle)::DICER1-NCOA6-AGO2_complex::RNA-induced_silencing_complex,_RISC::TRBP_containing_complex_(DICER,_TRBP,_AGO2,_RPL7A,_EIF6,_MOV10)::FIB-associated_protein_complex	0.0052	129	structural constituent of ribosome: 3.228e-12	RNA binding: 8.191e-05	rRNA binding: 0.009667
256	4	Q10567, O43747, P61966, Q9BXS5,	96	1.4142	Q10567, O43747, P61966, Q9BXS5,	1	93.3333	1.6997	-2.6667	2.08895	0.171919	Gamma-BAR-AP1_complex	0.4444	9	Gamma-BAR-AP1_complex	0.4444	9	protein transporter activity: 8.127e-07	transporter activity: 0.001363	kinesin binding: 0.009531
841	2	Q92785, Q92542,	33.3333	4.9216	Q92785, Q92542,	1	26.3333	3.0912	-7	2.08614	0.172269	APH1A-PSEN1-NCSTN_complex::CD147-gamma-secretase_complex_(APH-1a,_PS-1,_PEN-2,_NCT_variant)::Gamma-secretase_complex_(APH1A,_PSEN1,_PSENEN,_NCSTN)::Gamma-secretase_complex_(APH1A,_PSEN1,_PSENEN,_NCSTN_variant)::Gamma-secretase-Delta1_complex::APH1A-PSEN2-NCSTN_complex::Gamma-secretase_complex_(APH1A,_PSEN2,_PSENEN,_NCSTN)::Gamma-secretase_complex_(APH1B,_PSEN1,_PSENEN,_NCSTN)::Gamma-secretase_com…	0.0625	8	APH1A-PSEN1-NCSTN_complex::CD147-gamma-secretase_complex_(APH-1a,_PS-1,_PEN-2,_NCT_variant)::Gamma-secretase_complex_(APH1A,_PSEN1,_PSENEN,_NCSTN)::Gamma-secretase_complex_(APH1A,_PSEN1,_PSENEN,_NCSTN_variant)::Gamma-secretase-Delta1_complex::APH1A-PSEN2-NCSTN_complex::Gamma-secretase_complex_(APH1A,_PSEN2,_PSENEN,_NCSTN)::Gamma-secretase_complex_(APH1B,_PSEN1,_PSENEN,_NCSTN)::Gamma-secretase_com…	0.0625	8	endopeptidase activity: 0.006812
1261	2	Q9NPD3, Q96B26,	3.3333	0.9428	Q9NPD3, Q96B26,	1	5.6667	1.6997	2.3334	2.07935	0.173121	Exosome	0.1818	11	Exosome	0.1818	11	exoribonuclease activity: 5.112e-07	AU-rich element binding: 8.261e-07	3'-5'-exoribonuclease activity: 0.002373
295	4	Q96EB1, Q9H9T3, Q6IA86, O95163,	73	3.7417	Q96EB1, Q9H9T3, Q6IA86, O95163,	1	68.3333	1.2472	-4.6667	2.04939	0.176946	Elongator_core_complex::Elongator_holo_complex	1	4	Elongator_core_complex::Elongator_holo_complex	1	4	phosphorylase kinase regulator activity: 4.544e-10	histone acetyltransferase activity: 4.517e-05	N-acetyltransferase activity: 0.006561	DNA binding: 0.006649	iron-sulfur cluster binding: 0.006849	signal transducer activity: 0.07039	protein kinase binding: 0.09017
456	6	Q9BQ15, O60828, P30405, Q9Y5M8, P29558, Q8IWZ8,	2.3333	1.2472	Q9BQ15, O60828, P30405, Q9Y5M8, P29558, Q8IWZ8,	1	7	3.7417	4.6667	2.04939	0.176946							single-stranded DNA binding: 0.0004233	cyclosporin A binding: 0.003625	peptidyl-prolyl cis-trans isomerase activity: 0.01833	RNA binding: 0.03012	double-stranded DNA binding: 0.04423	nucleic acid binding: 0.06297	transcription coactivator activity: 0.09016
1060	2	Q12996, P33240,	2.6667	1.2472	Q12996, P33240,	1	5.3333	1.8856	2.6666	2.04299	0.177777	BARD1-BRCA1-CSTF64_complex::BARD1-BRCA1-CSTF_complex::Cleavage_stimulation_factor::Polyadenylation_complex_(CSTF1,_CSTF2,_CSTF3,_SYMPK_CPSF1,_CPSF2,_CPSF3)::Cleavage_and_polyadenylation_factor_(CPSF)	0.1818	11	BARD1-BRCA1-CSTF64_complex::BARD1-BRCA1-CSTF_complex::Cleavage_stimulation_factor::Polyadenylation_complex_(CSTF1,_CSTF2,_CSTF3,_SYMPK_CPSF1,_CPSF2,_CPSF3)::Cleavage_and_polyadenylation_factor_(CPSF)	0.1818	11	RNA binding: 0.002461	nucleotide binding: 0.05475
949	2	Q9BZV1, Q14258,	20.3333	3.3993	Q9BZV1, Q14258,	1	16	1.4142	-4.3333	2.03857	0.178354							ubiquitin-protein ligase activity: 0.035	molecular_function: 0.06358
989	2	Q9NSD9, Q9Y285,	43.6667	5.2493	Q9NSD9, Q9Y285,	1	50.6667	2.8674	7	2.02701	0.179877							phenylalanine-tRNA ligase activity: 9.166e-08	aminoacyl-tRNA ligase activity: 0.003629	tRNA binding: 0.00474	ATP binding: 0.0148	magnesium ion binding: 0.03026	RNA binding: 0.09431
48	61	P62851, P30050, P62854, P62857, P50914, P05388, P62979, P39019, P18621, Q12906, P62910, P62424, P61513, P62913, P62280, Q02543, P46777, P62753, P62750, P52272, P25398, P62899, P46782, P26373, P62266, P62241, P36578, P62244, P62263, Q71UM5, P62249, P62917, P62277, P63220, P62906, P39023, P83731, P62847, P23396, P61313, P46778, P84098, P19338, P15880, P08708, P61247, P06748, P08865, P18124, P62829,…	20	2.9439	P62851, P30050, P62854, P62857, P50914, P05388, P62979, P39019, P18621, Q12906, P62910, P62424, P61513, P62913, P62280, Q02543, P46777, P62753, P62750, P52272, P25398, P62899, P46782, P26373, P62266, P62241, P36578, P62244, P62263, Q71UM5, P62249, P62917, P62277, P63220, P62906, P39023, P83731, P62847, P23396, P61313, P46778, P84098, P19338, P15880, P08708, P61247, P06748, P08865, P18124, P62829,…	1	16.3333	1.2472	-3.6667	1.9864	0.185367	40S_ribosomal_subunit,_cytoplasmic::Nop56p-associated_pre-rRNA_complex::TRBP_containing_complex_(DICER,_RPL7A,_EIF6,_MOV10_and_subunits_of_the_60S_ribosomal_particle)::DICER1-NCOA6-AGO2_complex::RNA-induced_silencing_complex,_RISC::TRBP_containing_complex_(DICER,_TRBP,_AGO2,_RPL7A,_EIF6,_MOV10)::FIB-associated_protein_complex	0.4275	129	40S_ribosomal_subunit,_cytoplasmic::Nop56p-associated_pre-rRNA_complex::TRBP_containing_complex_(DICER,_RPL7A,_EIF6,_MOV10_and_subunits_of_the_60S_ribosomal_particle)::DICER1-NCOA6-AGO2_complex::RNA-induced_silencing_complex,_RISC::TRBP_containing_complex_(DICER,_TRBP,_AGO2,_RPL7A,_EIF6,_MOV10)::FIB-associated_protein_complex	0.4275	129	structural constituent of ribosome: 1.746e-105	RNA binding: 2.328e-34	rRNA binding: 7.462e-10	mRNA binding: 3.565e-06	NF-kappaB binding: 0.005792	ribosomal large subunit binding: 0.005889	fibroblast growth factor binding: 0.006368	laminin receptor activity: 0.008807	5S rRNA binding: 0.008807	mRNA 5'-UTR binding: 0.01603	metal ion binding: 0.01664	translation regulator activity: 0.02456	Tat protein binding: 0.03016	DNA binding: 0.03193	ribosomal small subunit binding: 0.0357	protein kinase binding: 0.04454	translation initiation factor binding: 0.04523	protein kinase A binding: 0.05324	translation activator activity: 0.05456	DNA N-glycosylase activity: 0.05719	telomeric DNA binding: 0.06241	nucleotide binding: 0.06441	DNA-(apurinic or apyrimidinic site) lyase activity: 0.06499	protein binding: 0.07334	cysteine-type endopeptidase activator activity involved in apoptotic process: 0.07391	laminin binding: 0.07643	protein kinase inhibitor activity: 0.09361	iron-sulfur cluster binding: 0.0948
673	2	P33316, Q9Y2U8,	24.3333	3.2998	P33316, Q9Y2U8,	1	29	2.4495	4.6667	1.96685	0.18809	Emerin_complex_52	0.0217	23	Emerin_complex_52	0.0217	23	dUTP diphosphatase activity: 0.0003393	nucleotide binding: 0.05475
577	2	Q8NBL1, Q8IX18,	1	0	Q8NBL1, Q8IX18,	1	3.3333	2.0548	2.3333	1.96681	0.188096							UDP-glucosyltransferase activity: 4.848e-05	UDP-xylosyltransferase activity: 0.0001939	glucosyltransferase activity: 0.0001939	helicase activity: 0.01061	ATP-dependent helicase activity: 0.01262
597	2	Q9Y535, Q9P0W2,	6.6667	1.2472	Q9Y535, Q9P0W2,	1	8.6667	1.2472	2	1.96399	0.188493	ATR-HDAC2-CHD4_complex::Anti-HDAC2_complex::BHC_complex::HDAC1-associated_core_complex_cI::NRD_complex_(Nucleosome_remodeling_and_deacetylation_complex)::XFIM_complex::anti-BHC110_complex::BHC110_complex::CoREST-HDAC_complex::MTA2_complex::Mi2/NuRD_complex::HDAC1-associated_protein_complex::MeCP1_complex::HDAC1-associated_core_complex_cII::HDAC2-asscociated_core_complex::BRAF53-BRCA2_complex::MTA…	0.0081	62	ATR-HDAC2-CHD4_complex::Anti-HDAC2_complex::BHC_complex::HDAC1-associated_core_complex_cI::NRD_complex_(Nucleosome_remodeling_and_deacetylation_complex)::XFIM_complex::anti-BHC110_complex::BHC110_complex::CoREST-HDAC_complex::MTA2_complex::Mi2/NuRD_complex::HDAC1-associated_protein_complex::MeCP1_complex::HDAC1-associated_core_complex_cII::HDAC2-asscociated_core_complex::BRAF53-BRCA2_complex::MTA…	0.0081	62	DNA-directed RNA polymerase activity: 0.005367	DNA binding: 0.01533	protein heterodimerization activity: 0.04915
809	2	Q99973, P10155,	16.6667	1.2472	P10155, Q99973,	1	18.6667	1.2472	2	1.96399	0.188493	SRC-1_complex::SRC-3_complex	0.0625	8	SRC-1_complex::SRC-3_complex	0.0625	8	telomerase activity: 0.0007269	RNA binding: 0.002461
546	2	P20674, P10606,	268.667	2.4944	P20674, P10606,	1	264.667	2.4944	-4	1.96399	0.188493							cytochrome-c oxidase activity: 1.876e-06	electron carrier activity: 0.01257	metal ion binding: 0.01922
1045	2	Q9NX40, P21912,	6.6667	1.6997	Q9NX40, P21912,	1	4.6667	0.4714	-2	1.96393	0.188501							3 iron 4 sulfur cluster binding: 0.0001454	succinate dehydrogenase (ubiquinone) activity: 0.0002424	ubiquinone binding: 0.0007269	2 iron 2 sulfur cluster binding: 0.002421	4 iron 4 sulfur cluster binding: 0.006668	electron carrier activity: 0.01257
750	2	Q96GD0, Q9ULK4,	28	2.1602	Q96GD0, Q9ULK4,	1	24	2.8284	-4	1.94668	0.190956	ARC-L_complex::ARC_complex::CCNC-CDK8-MED1-MED6-MED7_xcomplex::Mediator_complex_1::Mediator_complex_2::hMediator_complex_(MED23,_CDK8,_CCNC)::hMediator_complex_(MED23,_CDK8,_CCNC,_MED7)::ARC92-Mediator_complex::Mediator_complex::CRSP-Mediator_2_complex::CRSP_complex::MED18-MED20-MED29_mediator_subcomplex::NAT_complex::TRAP-SMCC_mediator_complex::PC2_complex::SMCC_complex::TRAP_complex::DRIP_compl…	0.0119	42	ARC-L_complex::ARC_complex::CCNC-CDK8-MED1-MED6-MED7_xcomplex::Mediator_complex_1::Mediator_complex_2::hMediator_complex_(MED23,_CDK8,_CCNC)::hMediator_complex_(MED23,_CDK8,_CCNC,_MED7)::ARC92-Mediator_complex::Mediator_complex::CRSP-Mediator_2_complex::CRSP_complex::MED18-MED20-MED29_mediator_subcomplex::NAT_complex::TRAP-SMCC_mediator_complex::PC2_complex::SMCC_complex::TRAP_complex::DRIP_compl…	0.0119	42	pyridoxal phosphatase activity: 0.0002424	phosphoserine phosphatase activity: 0.0004362	heat shock protein binding: 0.003146	phosphoprotein phosphatase activity: 0.005077	transcription coactivator activity: 0.03209
1374	2	Q02241, P12956,	9	1.4142	Q02241, P12956,	1	10.6667	0.4714	1.6667	1.93655	0.192419	P53-BARD1-Ku70_complex	0.1667	3	P53-BARD1-Ku70_complex	0.1667	3	5'-deoxyribose-5-phosphate lyase activity: 0.00063	double-stranded telomeric DNA binding: 0.0008238	telomeric DNA binding: 0.002179	ATP-dependent DNA helicase activity: 0.005077	microtubule motor activity: 0.01176	damaged DNA binding: 0.01209	ATP binding: 0.0148	double-stranded DNA binding: 0.0152	microtubule binding: 0.02536	transcription regulatory region DNA binding: 0.02683	protein C-terminus binding: 0.02857
1245	2	P48637, P50750,	6	1.4142	P48637, P50750,	1	7.6667	0.4714	1.6667	1.93655	0.192419	BRD4-P-TEFb_complex::BRD4_complex::P-TEFb-BRD4-TRAP220_complex::Heterotrimeric_complex_(CCNT1,_CDK9,_GRN)::P-TEFb-7SKRNA-HEXIM1_complex::P-TEFb-SKP2_complex::Transcription_elongation_factor_complex_(SUPT5H,_CDK9,_CCNT1)	0.0417	12	BRD4-P-TEFb_complex::BRD4_complex::P-TEFb-BRD4-TRAP220_complex::Heterotrimeric_complex_(CCNT1,_CDK9,_GRN)::P-TEFb-7SKRNA-HEXIM1_complex::P-TEFb-SKP2_complex::Transcription_elongation_factor_complex_(SUPT5H,_CDK9,_CCNT1)	0.0417	12	glutathione synthase activity: 9.696e-05	snRNA binding: 0.001018	glutathione binding: 0.001114	glycine binding: 0.001163	RNA polymerase II carboxy-terminal domain kinase activity: 0.002856	peptide binding: 0.004933	cyclin-dependent protein serine/threonine kinase activity: 0.005801	ATP binding: 0.0148	transcription regulatory region DNA binding: 0.02683	magnesium ion binding: 0.03026	chromatin binding: 0.05062	protein kinase activity: 0.05461	protein homodimerization activity: 0.08226
522	3	Q9H0H0, Q9NVH2, Q75QN2,	8.6667	1.2472	Q9H0H0, Q9NVH2, Q75QN2,	1	7	0.8165	-1.6667	1.93655	0.192419	DSS1_complex::Integrator-RNAPII_complex::Integrator_complex	0.1667	18	DSS1_complex::Integrator-RNAPII_complex::Integrator_complex	0.1667	18	protein binding: 0.07615
1841	8	Q9Y3B7, P49406, Q9NX20, Q9P015, Q7Z7H8, Q9BRJ2, Q9BYD2, Q9BYD1,	1	0.8165	Q9Y3B7, P49406, Q9NX20, Q9P015, Q9BQC6, Q9BRJ2, Q9BYD2, Q9BYD1,	0.7656	2.6667	1.2472	1.6667	1.93655	0.192419							structural constituent of ribosome: 4.695e-16	rRNA binding: 0.01285
1845	9	P03886, P49821, O75251, P19404, P28331, O75306, Q9Y6M9, O96000, O00217,	24.3333	2.8674	P03915, P03886, P49821, O75251, P19404, P28331, O75306, Q9Y6M9, O96000, O00217,	0.9	21	0.8165	-3.3333	1.9365	0.192426	Respiratory_chain_complex_I_(beta_subunit)_mitochondrial::Respiratory_chain_complex_I_(gamma_subunit)_mitochondrial::Respiratory_chain_complex_I_(holoenzyme),_mitochondrial::Respiratory_chain_complex_I_(incomplete_intermediate),_mitochondrial::Respiratory_chain_complex_I_(intermediate_I/200kD_and_III/250kD),_mitochondrial::Respiratory_chain_complex_I_(intermediate_II/230kD),_mitochondrial::Respir…	0.1957	46	Respiratory_chain_complex_I_(beta_subunit)_mitochondrial::Respiratory_chain_complex_I_(gamma_subunit)_mitochondrial::Respiratory_chain_complex_I_(holoenzyme),_mitochondrial::Respiratory_chain_complex_I_(incomplete_intermediate),_mitochondrial::Respiratory_chain_complex_I_(intermediate_I/200kD_and_III/250kD),_mitochondrial::Respiratory_chain_complex_I_(intermediate_II/230kD),_mitochondrial::Respir…	0.2174	46	NADH dehydrogenase (ubiquinone) activity: 6.801e-24	4 iron 4 sulfur cluster binding: 4.842e-11	NADH dehydrogenase activity: 8.163e-09	oxidoreductase activity acting on NAD(P)H: 1.157e-07	quinone binding: 1.71e-05	electron carrier activity: 2.025e-05	2 iron 2 sulfur cluster binding: 5.14e-05	iron-sulfur cluster binding: 0.0001039	metal ion binding: 0.0003807	NAD binding: 0.0003964	oxidoreductase activity acting on NAD(P)H quinone or similar compound as acceptor: 0.006292	FMN binding: 0.01166	protease binding: 0.04499
785	2	P21912, Q15363,	7	2.1602	P21912, Q15363,	1	3.6667	2.0548	-3.3333	1.9365	0.192426							3 iron 4 sulfur cluster binding: 0.0001454	succinate dehydrogenase (ubiquinone) activity: 0.0002424	ubiquinone binding: 0.0007269	2 iron 2 sulfur cluster binding: 0.002421	4 iron 4 sulfur cluster binding: 0.006668	electron carrier activity: 0.01257
1163	2	P13051, Q53HV7,	13	1.633	P13051, Q53HV7,	1	16.3333	2.4944	3.3333	1.93649	0.192427							uracil DNA N-glycosylase activity: 1.798e-07	single-strand selective uracil DNA N-glycosylase activity: 0.0002908	DNA N-glycosylase activity: 0.001986
253	5	Q07866, Q9NSK0, Q9H0B6, Q12840, P33176,	24.6667	2.0548	Q07866, Q9NSK0, Q9H0B6, Q12840, P33176,	1	20.3333	3.2998	-4.3334	1.93083	0.19325							microtubule motor activity: 6.946e-12	motor activity: 0.0003017	microtubule binding: 0.001585	kinesin binding: 0.01188	tubulin binding: 0.01721	protein binding: 0.09298
1487	2	P61970, P62826,	205.667	6.7987	P61970, P62826,	1	193	9.2014	-12.6667	1.91767	0.195183	TNPO2-RAN-NXF1_complex	0.1667	3	TNPO2-RAN-NXF1_complex	0.1667	3	androgen receptor binding: 0.007919	transporter activity: 0.03017	transcription coactivator activity: 0.03209	GTPase activity: 0.03547	chromatin binding: 0.05062	GTP binding: 0.05351
465	5	Q96S52, O43292, Q92643, Q969N2, Q9H490,	12.3333	1.2472	Q96S52, O43292, Q92643, Q969N2, Q9H490,	1	14.6667	1.6997	2.3334	1.91707	0.195272	GAA1-GPI8-PIGT-PIG-PIGS_complex	1	5	GAA1-GPI8-PIGT-PIG-PIGS_complex	1	5	GPI-anchor transamidase activity: 2.044e-17	GPI anchor binding: 1.728e-09	protein disulfide isomerase activity: 0.006871	tubulin binding: 0.01721	cysteine-type endopeptidase activity: 0.02447	protein binding: 0.09298
1539	2	O00410, Q8TEX9,	138	2.9439	O00410, Q8TEX9,	1	129.667	6.9442	-8.3333	1.91366	0.195777	ASF1-histone_containing_complex::ASF1-interacting_protein_complex::Chromatin_assembly_complex_(CAF-1_complex)::Histone_H3.1_complex::Histone_H3.3_complex	0.0357	14	ASF1-histone_containing_complex::ASF1-interacting_protein_complex::Chromatin_assembly_complex_(CAF-1_complex)::Histone_H3.1_complex::Histone_H3.3_complex	0.0357	14	Ran GTPase binding: 6.294e-06	GTPase inhibitor activity: 0.002566	protein transporter activity: 0.01176
1259	2	Q9UBE0, Q9UBT2,	3.6667	0.4714	Q9UBE0, Q9UBT2,	1	7.3333	3.2998	3.6666	1.90524	0.197033	SUMO1-SUA1-UBA2_complex	0.6667	3	SUMO1-SUA1-UBA2_complex	0.6667	3	SUMO activating enzyme activity: 9.166e-08	small protein activating enzyme activity: 4.125e-07	enzyme activator activity: 1.032e-05	ligase activity: 4.46e-05	catalytic activity: 0.000467	protein heterodimerization activity: 0.0006349	ubiquitin activating enzyme activity: 0.0009691	ATP-dependent protein binding: 0.001986	protein C-terminus binding: 0.02857	transcription factor binding: 0.03817
1495	2	P12956, Q13017,	85	6.4807	P12956, Q13017,	1	70.3333	11.6714	-14.6667	1.90289	0.197385	P53-BARD1-Ku70_complex	0.1667	3	P53-BARD1-Ku70_complex	0.1667	3	5'-deoxyribose-5-phosphate lyase activity: 0.00063	double-stranded telomeric DNA binding: 0.0008238	telomeric DNA binding: 0.002179	Rho GTPase activator activity: 0.003678	ATP-dependent DNA helicase activity: 0.005077	SH2 domain binding: 0.005222	damaged DNA binding: 0.01209	double-stranded DNA binding: 0.0152	transcription regulatory region DNA binding: 0.02683	protein C-terminus binding: 0.02857	GTPase activity: 0.03547	GTP binding: 0.05351
1372	2	Q9H1B7, P46459,	92	2.8284	Q9H1B7, P46459,	1	102.333	8.9938	10.3333	1.89835	0.198067							ATPase activity coupled: 0.002324	syntaxin binding: 0.005126	PDZ domain binding: 0.009841	metal ion binding: 0.01922	protein complex binding: 0.02053	molecular_function: 0.06358
739	2	Q15061, O95071,	13.3333	3.6818	Q15061, O95071,	1	18	2.1602	4.6667	1.89353	0.198797	(E.F.G)_complex::12S_U11_snRNP::6S_methyltransferase_and_RG-containing_Sm_proteins_complex::20S_methylosome-SmD_complex::20S_methylosome_and_RG-containing_Sm_protein_complex::6S_methyltransferase_complex::JBP1-pICln_complex::SMN_complex,_U7_snRNA_specific::20S_methyltransferase_complex::AR_coactivator_complex::17S_U2_snRNP::SF3A1-SF3A2-SF3A3_complex::SF3b_complex::Exon_junction_complex::SRm160/30…	0.002	245	(E.F.G)_complex::12S_U11_snRNP::6S_methyltransferase_and_RG-containing_Sm_proteins_complex::20S_methylosome-SmD_complex::20S_methylosome_and_RG-containing_Sm_protein_complex::6S_methyltransferase_complex::JBP1-pICln_complex::SMN_complex,_U7_snRNA_specific::20S_methyltransferase_complex::AR_coactivator_complex::17S_U2_snRNP::SF3A1-SF3A2-SF3A3_complex::SF3b_complex::Exon_junction_complex::SRm160/30…	0.002	245	ubiquitin-ubiquitin ligase activity: 0.001211	ubiquitin binding: 0.00739	ubiquitin-protein ligase activity: 0.035	RNA binding: 0.09431
1525	2	Q8N1B4, Q99986,	6.6667	2.357	Q8N1B4, Q99986,	1	4	0.8165	-2.6667	1.85168	0.205275							transferase activity transferring phosphorus-containing groups: 0.01257	protein serine/threonine kinase activity: 0.06063
1694	11	Q12824, Q92925, P51531, O96019, P28370, Q8TAQ2, P51532, Q969G3, Q92922, Q8NFD5, O14497,	1.3333	1.2472	Q12824, Q92925, P51531, O96019, P28370, Q8TAQ2, P51532, Q969G3, Q92922, Q8NFD5, O14497,	1	0	0	-1.3333	1.85162	0.205283	RNA_polymerase_II_complex,_chromatin_structure_modifying::RNA_polymerase_II_complex,_incomplete_(CBP,_RPBI,_PCAF,_BAF47),_chromatin_structure_modifying::RNA_polymerase_II_complex_(CBP,_PCAF,_RPB1,_BAF47,_CYCC,_CDK8),_chromatin_structure_modifying::RNA_polymerase_II_complex_(RPB1,_RAP74,_CDK8,_CYCC,_SRB7,_BAF190,_BAF47),_chromatin_structure_modifying::RNA_polymerase_II_complex,_incomplete_(CDK8_co…	0.2238	26	RNA_polymerase_II_complex,_chromatin_structure_modifying::RNA_polymerase_II_complex,_incomplete_(CBP,_RPBI,_PCAF,_BAF47),_chromatin_structure_modifying::RNA_polymerase_II_complex_(CBP,_PCAF,_RPB1,_BAF47,_CYCC,_CDK8),_chromatin_structure_modifying::RNA_polymerase_II_complex_(RPB1,_RAP74,_CDK8,_CYCC,_SRB7,_BAF190,_BAF47),_chromatin_structure_modifying::RNA_polymerase_II_complex,_incomplete_(CDK8_co…	0.2238	26	transcription coactivator activity: 1.352e-17	chromatin binding: 4.634e-06	DNA-dependent ATPase activity: 1.041e-05	Tat protein binding: 1.352e-05	helicase activity: 2.366e-05	protein N-terminus binding: 6.719e-05	protein binding: 7.922e-05	DNA binding: 8.65e-05	RNA polymerase II transcription coactivator activity: 9.837e-05	ligand-dependent nuclear receptor binding: 0.0001246	nucleosome-dependent ATPase activity: 0.0005331	p53 binding: 0.001001	nucleosome binding: 0.004251	annealing helicase activity: 0.004251	hydrolase activity acting on acid anhydrides in phosphorus-containing anhydrides: 0.009256	histone acetyl-lysine binding: 0.01317	N-acetyltransferase activity: 0.01784	RNA polymerase II regulatory region sequence-specific DNA binding: 0.01784	androgen receptor binding: 0.04203
1251	2	Q86U42, P04406,	0	0	Q86U42, P04406,	1	1.3333	1.2472	1.3333	1.85162	0.205283	GAIT_complex	0.125	4	GAIT_complex	0.125	4	peptidyl-cysteine S-nitrosylase activity: 9.696e-05	glyceraldehyde-3-phosphate dehydrogenase (NAD+) (phosphorylating) activity: 0.0001939	NAD binding: 0.006716	NADP binding: 0.006957	microtubule binding: 0.02536	nucleotide binding: 0.05475	identical protein binding: 0.06927	RNA binding: 0.09431
1898	2	Q15843, Q9Y3D2,	1.3333	1.2472	Q15843, Q9Y3D2,	1	0	0	-1.3333	1.85162	0.205283	Heterotrimeric_SKP1-CUL1-ROC1_complex::Neddylin_ligase_(FBXO11,_SKP1,_CUL1,_RBX1)::Ubiquitin_E3_ligase_(CUL1,_RBX1,_SKP1A)::Ubiquitin_E3_ligase_(CDC34,_NEDD8,_BTRC,_CUL1,_SKP1A,_RBX1)::Ubiquitin_E3_ligase_(SMAD3,_BTRC,_CUL1,_SKP1A,_RBX1)::Ubiquitin_E3_ligase_(FBXO18,_SKP1A,_CUL1,_RBX1)::Ubiquitin_E3_ligase_(FBXO31,_SKP1A,_CUL1,_RBX1)::Ubiquitin_E3_ligase_(FBXW11,_SKP1A,_CUL1,_RBX1)::Ubiquitin_E3_…	0.0385	13	Heterotrimeric_SKP1-CUL1-ROC1_complex::Neddylin_ligase_(FBXO11,_SKP1,_CUL1,_RBX1)::Ubiquitin_E3_ligase_(CUL1,_RBX1,_SKP1A)::Ubiquitin_E3_ligase_(CDC34,_NEDD8,_BTRC,_CUL1,_SKP1A,_RBX1)::Ubiquitin_E3_ligase_(SMAD3,_BTRC,_CUL1,_SKP1A,_RBX1)::Ubiquitin_E3_ligase_(FBXO18,_SKP1A,_CUL1,_RBX1)::Ubiquitin_E3_ligase_(FBXO31,_SKP1A,_CUL1,_RBX1)::Ubiquitin_E3_ligase_(FBXW11,_SKP1A,_CUL1,_RBX1)::Ubiquitin_E3_…	0.0385	13	peptide-methionine (R)-S-oxide reductase activity: 0.0005331	ubiquitin protein ligase binding: 0.0256	actin binding: 0.05292
1745	2	P78318, P09382,	1.3333	1.2472	P78318, P09382,	1	0	0	-1.3333	1.85162	0.205283	Anti-SMN_protein_complex::Anti-Sm_protein_complex::SMN1-SIP1-SNRP_complex::SMN_complex::SMN_complex_(GEMIN2,5,_SMN)::SMN_complex_(GEMIN5,2,3,4,_SMN)::SMN_complex_(GEMIN5,4,3),_SMN-independent_intermediate::SMN_complex_(GEMIN6,7,_UNRIP),_SMN-independent_intermediate::SMN_containing_complex::PPP4C-PPP4R2-Gemin3-Gemin4_complex::SMN-PolII-RHA_complex	0.0172	29	Anti-SMN_protein_complex::Anti-Sm_protein_complex::SMN1-SIP1-SNRP_complex::SMN_complex::SMN_complex_(GEMIN2,5,_SMN)::SMN_complex_(GEMIN5,2,3,4,_SMN)::SMN_complex_(GEMIN5,4,3),_SMN-independent_intermediate::SMN_complex_(GEMIN6,7,_UNRIP),_SMN-independent_intermediate::SMN_containing_complex::PPP4C-PPP4R2-Gemin3-Gemin4_complex::SMN-PolII-RHA_complex	0.0172	29	lactose binding: 0.0001939	galactoside binding: 0.0005331	mitogen-activated protein kinase kinase binding: 0.001647	laminin binding: 0.002711	protein phosphatase type 2A regulator activity: 0.003195	glycoprotein binding: 0.005608	signal transducer activity: 0.03654	protein homodimerization activity: 0.08226
514	4	Q9Y4Y9, Q00403, Q9Y4Z0, Q9Y333,	1.3333	1.2472					-1.3333	1.85162	0.205283	Emerin_complex_25	0.0156	16				U6 snRNA binding: 0.002613	TBP-class protein binding: 0.005119	core promoter binding: 0.005312	thyroid hormone receptor binding: 0.007616	RNA binding: 0.01334	protein binding: 0.03228	transcription factor binding: 0.0734	protein kinase binding: 0.09017
244	13	P07814, O43324, P22314, P54136, Q13155, P14868, P56192, Q9P2J5, P47897, Q9Y490, P41252, Q12904, Q15046,	4.6667	0.9428	P07814, O43324, P22314, P54136, Q13155, P14868, P56192, Q9P2J5, P47897, Q9Y490, P41252, Q12904, Q15046,	1	6	0.8165	1.3333	1.8516	0.205287	Multisynthetase_complex	0.8462	11	Multisynthetase_complex	0.8462	11	tRNA binding: 2.097e-08	aminoacyl-tRNA ligase activity: 1.622e-06	ATP binding: 2.475e-06	aminoacyl-tRNA editing activity: 2.733e-05	proline-tRNA ligase activity: 0.00063	glutamate-tRNA ligase activity: 0.001259	lysine-tRNA ligase activity: 0.001259	RNA stem-loop binding: 0.001888	protein binding: 0.002052	glutamine-tRNA ligase activity: 0.002202	isoleucine-tRNA ligase activity: 0.002202	leucine-tRNA ligase activity: 0.002516	arginine binding: 0.002829	aspartate-tRNA ligase activity: 0.002829	arginine-tRNA ligase activity: 0.002829	methionine-tRNA ligase activity: 0.003143	aminoacylase activity: 0.005332	small protein activating enzyme activity: 0.008444	LIM domain binding: 0.009684	amino acid binding: 0.02253	insulin receptor binding: 0.02464	vinculin binding: 0.02704	ligase activity: 0.08026	cytokine activity: 0.08293	structural constituent of cytoskeleton: 0.09368
62	61	P62851, P30050, P62854, P62857, P50914, P05388, P62979, P39019, P18621, Q12906, P62910, P62424, P61513, P62913, P62280, Q02543, P62847, P62753, P62750, P62241, P52272, P25398, P62899, P46782, P62081, P62266, P61313, P36578, P62244, P62263, Q71UM5, P62249, P62917, P62277, P32969, P62906, P39023, P83731, P46777, P23396, P55769, P46778, Q14978, P62829, P35268, P15880, P08708, P61247, P08865, P18124,…	1	0.8165	P62851, P30050, P62854, P62857, P50914, P05388, P62979, P39019, P18621, Q12906, P62910, P62424, P61513, P62913, P62280, Q02543, P62847, P62753, P62750, P62241, P52272, P25398, P62899, P46782, P62081, P62266, P55769, P36578, P62244, P62263, Q71UM5, P62249, P62917, P62277, P32969, P62906, P39023, P83731, P46777, P23396, P61313, P46778, Q14978, P62829, P35268, P15880, P08708, P61247, P08865, P18124,…	1	2.3333	0.9428	1.3333	1.8516	0.205287	40S_ribosomal_subunit,_cytoplasmic::Nop56p-associated_pre-rRNA_complex::TRBP_containing_complex_(DICER,_RPL7A,_EIF6,_MOV10_and_subunits_of_the_60S_ribosomal_particle)::DICER1-NCOA6-AGO2_complex::RNA-induced_silencing_complex,_RISC::TRBP_containing_complex_(DICER,_TRBP,_AGO2,_RPL7A,_EIF6,_MOV10)::FIB-associated_protein_complex	0.4275	129	40S_ribosomal_subunit,_cytoplasmic::Nop56p-associated_pre-rRNA_complex::TRBP_containing_complex_(DICER,_RPL7A,_EIF6,_MOV10_and_subunits_of_the_60S_ribosomal_particle)::DICER1-NCOA6-AGO2_complex::RNA-induced_silencing_complex,_RISC::TRBP_containing_complex_(DICER,_TRBP,_AGO2,_RPL7A,_EIF6,_MOV10)::FIB-associated_protein_complex	0.4275	129	structural constituent of ribosome: 1.746e-105	RNA binding: 7.185e-33	rRNA binding: 7.462e-10	mRNA binding: 3.565e-06	ATP binding: 0.003074	fibroblast growth factor binding: 0.006368	laminin receptor activity: 0.008807	5S rRNA binding: 0.008807	mRNA 5'-UTR binding: 0.01603	metal ion binding: 0.01664	translation regulator activity: 0.02456	DNA binding: 0.03193	snoRNA binding: 0.04252	translation initiation factor binding: 0.04523	protein kinase A binding: 0.05324	translation activator activity: 0.05456	DNA N-glycosylase activity: 0.05719	DNA-(apurinic or apyrimidinic site) lyase activity: 0.06499	protein binding: 0.07334	cysteine-type endopeptidase activator activity involved in apoptotic process: 0.07391	laminin binding: 0.07643	iron-sulfur cluster binding: 0.0948
1390	2	Q9GZS3, Q8TBC4,	3	0.8165	Q9GZS3, Q8TBC4,	1	1.6667	0.9428	-1.3333	1.8516	0.205287	SKI_complex	0.1667	3	SKI_complex	0.1667	3	NEDD8 activating enzyme activity: 0.0003878	small protein activating enzyme activity: 0.001308	ligand-dependent nuclear receptor binding: 0.00305	acid-amino acid ligase activity: 0.005752	catalytic activity: 0.04231	protein heterodimerization activity: 0.04915
603	2	O15116, O15357,	2	0.8165	O15116, O15357,	1	0.6667	0.9428	-1.3333	1.8516	0.205287	(E.F.G)_complex::12S_U11_snRNP::6S_methyltransferase_and_RG-containing_Sm_proteins_complex::20S_methylosome-SmD_complex::20S_methylosome_and_RG-containing_Sm_protein_complex::6S_methyltransferase_complex::JBP1-pICln_complex::SMN_complex,_U7_snRNA_specific::20S_methyltransferase_complex::AR_coactivator_complex::17S_U2_snRNP::SF3A1-SF3A2-SF3A3_complex::SF3b_complex::Exon_junction_complex::SRm160/30…	0.002	245	(E.F.G)_complex::12S_U11_snRNP::6S_methyltransferase_and_RG-containing_Sm_proteins_complex::20S_methylosome-SmD_complex::20S_methylosome_and_RG-containing_Sm_protein_complex::6S_methyltransferase_complex::JBP1-pICln_complex::SMN_complex,_U7_snRNA_specific::20S_methyltransferase_complex::AR_coactivator_complex::17S_U2_snRNP::SF3A1-SF3A2-SF3A3_complex::SF3b_complex::Exon_junction_complex::SRm160/30…	0.002	245	inositol-polyphosphate 5-phosphatase activity: 0.001647	phosphatidylinositol-3 4 5-trisphosphate binding: 0.003291	SH2 domain binding: 0.005222	SH3 domain binding: 0.01806	actin binding: 0.05292	RNA binding: 0.09431
1413	2	Q9UNN5, O43809,	2.3333	2.0548	Q9UNN5, O43809,	1	5.6667	2.357	3.3334	1.84642	0.206108	CF_IIAm_complex_(Cleavage_factor_IIAm_complex)	0.0312	16	CF_IIAm_complex_(Cleavage_factor_IIAm_complex)	0.0312	16	protein kinase regulator activity: 0.0005816	AU-rich element binding: 0.001841	heat shock protein binding: 0.003146	NF-kappaB binding: 0.003774	ubiquitin binding: 0.00739	histone deacetylase binding: 0.009937	mRNA binding: 0.01348	ubiquitin protein ligase binding: 0.0256	protein domain specific binding: 0.0281	hydrolase activity: 0.02899	protein kinase binding: 0.04735	protein homodimerization activity: 0.08226	RNA binding: 0.09431
1231	2	Q9Y5X2, Q9H900,	36.3333	1.6997	Q9Y5X2, Q9H900,	1	39.6667	2.6247	3.3334	1.84639	0.206114							phosphatidylinositol binding: 0.01219
1117	2	Q8WXI9, Q13330,	18.3333	0.9428	Q8WXI9, Q13330,	1	16.6667	1.2472	-1.6666	1.84632	0.206124	ATR-HDAC2-CHD4_complex::Anti-HDAC2_complex::BHC_complex::HDAC1-associated_core_complex_cI::NRD_complex_(Nucleosome_remodeling_and_deacetylation_complex)::XFIM_complex::anti-BHC110_complex::BHC110_complex::CoREST-HDAC_complex::MTA2_complex::Mi2/NuRD_complex::HDAC1-associated_protein_complex::MeCP1_complex::HDAC1-associated_core_complex_cII::HDAC2-asscociated_core_complex::BRAF53-BRCA2_complex::MTA…	0.0323	62	ATR-HDAC2-CHD4_complex::Anti-HDAC2_complex::BHC_complex::HDAC1-associated_core_complex_cI::NRD_complex_(Nucleosome_remodeling_and_deacetylation_complex)::XFIM_complex::anti-BHC110_complex::BHC110_complex::CoREST-HDAC_complex::MTA2_complex::Mi2/NuRD_complex::HDAC1-associated_protein_complex::MeCP1_complex::HDAC1-associated_core_complex_cII::HDAC2-asscociated_core_complex::BRAF53-BRCA2_complex::MTA…	0.0323	62	sequence-specific DNA binding: 0.001136	sequence-specific DNA binding transcription factor activity: 0.004193	RNA polymerase II repressing transcription factor binding: 0.004547	zinc ion binding: 0.007537	enzyme binding: 0.0378	chromatin binding: 0.05062
730	2	Q7Z2W7, Q96JM3,	5.6667	1.2472	Q7Z2W7, Q96JM3,	1	7.3333	0.9428	1.6666	1.84632	0.206124							calcium channel activity: 0.007727	ion channel activity: 0.0084	protein homodimerization activity: 0.08226
1143	2	Q9H9Y6, O15446,	23	1.4142	Q9H9Y6, O15446,	1	26	2.4495	3	1.83712	0.207594	NMI-POLR1B-RRN3_complex	0.1667	3	NMI-POLR1B-RRN3_complex	0.1667	3	DNA-directed RNA polymerase activity: 7.174e-06	ribonucleoside binding: 0.0009691	RNA polymerase I activity: 0.001792
374	6	Q9H1D9, Q9Y535, Q9BUI4, P19388, O15160, O14802,	16.6667	4.1096	Q9H1D9, Q9Y535, Q9BUI4, P19388, O15160, O14802,	1	12	1.633	-4.6667	1.82783	0.209092	URI_complex_(Unconventional_prefoldin_RPB5_Interactor)::Ubiquitin_E3_ligase_(SKP1A,_SKP2,_CUL1)	0.0185	9	URI_complex_(Unconventional_prefoldin_RPB5_Interactor)::Ubiquitin_E3_ligase_(SKP1A,_SKP2,_CUL1)	0.0185	9	DNA-directed RNA polymerase activity: 3.308e-16	RNA polymerase III activity: 5.589e-09	DNA binding: 3.594e-06	RNA polymerase I activity: 1.17e-05	ribonucleoside binding: 0.002902	RNA polymerase II activity: 0.004781	protein dimerization activity: 0.06066
1493	2	Q13123, Q14151,	1.6667	1.6997	Q13123, Q14151,	1	4	1.4142	2.3333	1.82778	0.2091	(E.F.G)_complex::12S_U11_snRNP::6S_methyltransferase_and_RG-containing_Sm_proteins_complex::20S_methylosome-SmD_complex::20S_methylosome_and_RG-containing_Sm_protein_complex::6S_methyltransferase_complex::JBP1-pICln_complex::SMN_complex,_U7_snRNA_specific::20S_methyltransferase_complex::AR_coactivator_complex::17S_U2_snRNP::SF3A1-SF3A2-SF3A3_complex::SF3b_complex::Exon_junction_complex::SRm160/30…	0.002	245	(E.F.G)_complex::12S_U11_snRNP::6S_methyltransferase_and_RG-containing_Sm_proteins_complex::20S_methylosome-SmD_complex::20S_methylosome_and_RG-containing_Sm_protein_complex::6S_methyltransferase_complex::JBP1-pICln_complex::SMN_complex,_U7_snRNA_specific::20S_methyltransferase_complex::AR_coactivator_complex::17S_U2_snRNP::SF3A1-SF3A2-SF3A3_complex::SF3b_complex::Exon_junction_complex::SRm160/30…	0.002	245	identical protein binding: 0.00129	nucleotide binding: 0.05475	RNA binding: 0.09431
1053	2	P14635, O14777,	46	2.9439	P14635, O14777,	1	51.6667	4.4969	5.6667	1.82611	0.209371	NDC80_kinetochore_complex	0.125	4	NDC80_kinetochore_complex	0.125	4	patched binding: 0.001114	kinase activity: 0.02186	protein kinase binding: 0.04735
321	60	P62851, P18621, P62854, P62857, P50914, P05388, P62979, P39019, P31153, P62910, P62424, P46776, P61513, P62913, P62280, P30050, P62847, P62753, P62750, P25398, P62899, P46782, Q02543, P62266, P62241, P36578, P62244, P62263, Q71UM5, P62249, P62917, P62277, P32969, P62906, P39023, P83731, P46777, P23396, P61313, P46778, P62829, P35268, P15880, P08708, P61247, Q12906, P08865, P18124, P84098, P62701,…	20.6667	2.357	P62851, P18621, P62854, P62857, P50914, P05388, P62979, P39019, P31153, P62910, P62424, P46776, P61513, P62913, P62280, P30050, P62847, P62753, P62750, P25398, P62899, P46782, Q02543, P62266, P62241, P36578, P62244, P62263, Q71UM5, P62249, P62917, P62277, P32969, P62906, P39023, P83731, P46777, P23396, P61313, P46778, P62829, P35268, P15880, P08708, P61247, Q12906, P08865, P18124, P84098, P62701,…	1	23.3333	0.9428	2.6666	1.81941	0.210463	40S_ribosomal_subunit,_cytoplasmic::Nop56p-associated_pre-rRNA_complex::TRBP_containing_complex_(DICER,_RPL7A,_EIF6,_MOV10_and_subunits_of_the_60S_ribosomal_particle)::DICER1-NCOA6-AGO2_complex::RNA-induced_silencing_complex,_RISC::TRBP_containing_complex_(DICER,_TRBP,_AGO2,_RPL7A,_EIF6,_MOV10)::FIB-associated_protein_complex	0.4052	129	40S_ribosomal_subunit,_cytoplasmic::Nop56p-associated_pre-rRNA_complex::TRBP_containing_complex_(DICER,_RPL7A,_EIF6,_MOV10_and_subunits_of_the_60S_ribosomal_particle)::DICER1-NCOA6-AGO2_complex::RNA-induced_silencing_complex,_RISC::TRBP_containing_complex_(DICER,_TRBP,_AGO2,_RPL7A,_EIF6,_MOV10)::FIB-associated_protein_complex	0.4052	129	structural constituent of ribosome: 6.567e-110	RNA binding: 8.927e-32	rRNA binding: 6.738e-10	mRNA binding: 3.236e-06	ATP binding: 0.003443	methionine adenosyltransferase activity: 0.005793	fibroblast growth factor binding: 0.006172	laminin receptor activity: 0.008664	5S rRNA binding: 0.008664	mRNA 5'-UTR binding: 0.01577	translation regulator activity: 0.02416	DNA binding: 0.03465	metal ion binding: 0.04219	translation initiation factor binding: 0.04452	protein kinase A binding: 0.05241	translation activator activity: 0.05372	DNA N-glycosylase activity: 0.05631	DNA-(apurinic or apyrimidinic site) lyase activity: 0.064	cysteine-type endopeptidase activator activity involved in apoptotic process: 0.0728	laminin binding: 0.07528	protein binding: 0.08227	iron-sulfur cluster binding: 0.09341
942	2	O76094, Q9UHB9,	187	2.4495	O76094, Q9UHB9,	1	183	2.9439	-4	1.80907	0.212161							signal recognition particle binding: 3.29e-08	7S RNA binding: 2.973e-07	endoplasmic reticulum signal peptide binding: 0.0004847
261	4	Q96KP1, O60645, Q96A65, Q8IYI6,	19	3.7417	Q96KP1, O60645, Q96A65, Q8IYI6,	1	23.3333	1.8856	4.3333	1.7913	0.215123	Sec6/8_exocyst_complex	0.5	8	Sec6/8_exocyst_complex	0.5	8	protein N-terminus binding: 0.0003391	Ral GTPase binding: 0.0009689	PDZ domain binding: 0.01949	protein binding: 0.03228	phospholipid binding: 0.09572
943	2	Q9Y478, Q13131,	96	6.9761	Q9Y478, Q13131,	1	104	3.559	8	1.76932	0.218864							[hydroxymethylglutaryl-CoA reductase (NADPH)] kinase activity: 9.696e-05	[acetyl-CoA carboxylase] kinase activity: 9.696e-05	histone serine kinase activity: 0.0003393	protein kinase activity: 0.0007886	AMP-activated protein kinase activity: 0.0009207	cAMP-dependent protein kinase activity: 0.001453	tau-protein kinase activity: 0.002179	kinase binding: 0.00739	protein C-terminus binding: 0.02857	protein kinase binding: 0.04735	chromatin binding: 0.05062	protein serine/threonine kinase activity: 0.06063
1419	2	Q9UBS4, O00115,	23	2.9439	Q9UBS4, O00115,	1	19.3333	2.0548	-3.6667	1.76901	0.218917							deoxyribonuclease II activity: 0.0001939	unfolded protein binding: 0.01578
383	6	P35251, P35250, P40938, P40937, P35249, Q00577,	34	0	P35251, P35250, P40938, P40937, P35249, Q00577,	1	31	2.9439	-3	1.76506	0.219599	CHL12-RFC2-5_complex::CTF18-RFC_subcomplex::CTF18-cohesion-RFC-POLH_complex::CTF18-CTF8-DCC1-RFC3_complex::CTF18-CTF8-DCC1_complex::CTF18-cohesion-RFC_complex::CTF8-CTF18-DCC1_subcomplex::PCNA-CHL12-RFC2-5_complex::PCNA-RFC2-5_complex	0.2963	9	CHL12-RFC2-5_complex::CTF18-RFC_subcomplex::CTF18-cohesion-RFC-POLH_complex::CTF18-CTF8-DCC1-RFC3_complex::CTF18-CTF8-DCC1_complex::CTF18-cohesion-RFC_complex::CTF8-CTF18-DCC1_subcomplex::PCNA-CHL12-RFC2-5_complex::PCNA-RFC2-5_complex	0.2963	9	DNA clamp loader activity: 5.288e-08	nucleoside-triphosphatase activity: 1.09e-06	purine-rich negative regulatory element binding: 0.0007268	double-stranded telomeric DNA binding: 0.002468	ATP binding: 0.002535	DNA binding: 0.002704	translation repressor activity nucleic acid binding: 0.003914	protein binding: 0.005797	SMAD binding: 0.01734	enzyme activator activity: 0.01904	single-stranded DNA binding: 0.03143	RNA polymerase II distal enhancer sequence-specific DNA binding transcription factor activity: 0.03198	ATPase activity: 0.06027
846	2	Q9NZ45, Q9P0U1,	8	2.4495	Q9NZ45, Q9P0U1,	1	11	1.633	3	1.76504	0.219602							protein transmembrane transporter activity: 0.0005816	2 iron 2 sulfur cluster binding: 0.002421
675	2	P42224, P46459,	81.6667	1.6997	P42224, P46459,	1	91.6667	9.7411	10	1.75162	0.221938	Interferon-stimulated_gene_factor_3_transcription_complex_ISGF3	0.1667	3	Interferon-stimulated_gene_factor_3_transcription_complex_ISGF3	0.1667	3	RNA polymerase II core promoter sequence-specific DNA binding transcription factor activity: 0.00155	ATPase activity coupled: 0.002324	tumor necrosis factor receptor binding: 0.003098	syntaxin binding: 0.005126	RNA polymerase II core promoter sequence-specific DNA binding: 0.005415	RNA polymerase II core promoter proximal region sequence-specific DNA binding: 0.006331	PDZ domain binding: 0.009841	double-stranded DNA binding: 0.0152	protein complex binding: 0.02053	signal transducer activity: 0.03654	enzyme binding: 0.0378	identical protein binding: 0.06927	protein homodimerization activity: 0.08226	calcium ion binding: 0.09204
1700	8	Q93008, P63146, Q9UNE7, Q15436, P54727, O94888, Q15819, P68036,	2.3333	0.4714	Q93008, P63146, Q9UNE7, Q15436, P54727, O94888, Q15819, P68036,	1	3.6667	1.2472	1.3334	1.73216	0.225383	N-NOS-CHIP-HSP70-1_complex	0.0417	3	N-NOS-CHIP-HSP70-1_complex	0.0417	3	ubiquitin protein ligase binding: 1.859e-06	acid-amino acid ligase activity: 0.0002271	ubiquitin-protein ligase activity: 0.0002884	protein binding: 0.001041	TPR domain binding: 0.004058	misfolded protein binding: 0.004251	ubiquitin-ubiquitin ligase activity: 0.004828	Hsp70 protein binding: 0.006173	enzyme binding: 0.009243	Hsp90 protein binding: 0.009997	co-SMAD binding: 0.01057	polyubiquitin binding: 0.0119	SMAD binding: 0.02299	protein binding bridging: 0.02762	kinase binding: 0.02891	ubiquitin binding: 0.02891	cysteine-type endopeptidase activity: 0.03858	single-stranded DNA binding: 0.04146	damaged DNA binding: 0.04665	ubiquitin thiolesterase activity: 0.04718	cysteine-type peptidase activity: 0.05406
796	2	Q15386, Q96T37,	3.3333	1.2472	Q15386, Q96T37,	1	4.6667	0.4714	1.3334	1.73216	0.225383	(E.F.G)_complex::12S_U11_snRNP::6S_methyltransferase_and_RG-containing_Sm_proteins_complex::20S_methylosome-SmD_complex::20S_methylosome_and_RG-containing_Sm_protein_complex::6S_methyltransferase_complex::JBP1-pICln_complex::SMN_complex,_U7_snRNA_specific::20S_methyltransferase_complex::AR_coactivator_complex::17S_U2_snRNP::SF3A1-SF3A2-SF3A3_complex::SF3b_complex::Exon_junction_complex::SRm160/30…	0.002	245	(E.F.G)_complex::12S_U11_snRNP::6S_methyltransferase_and_RG-containing_Sm_proteins_complex::20S_methylosome-SmD_complex::20S_methylosome_and_RG-containing_Sm_protein_complex::6S_methyltransferase_complex::JBP1-pICln_complex::SMN_complex,_U7_snRNA_specific::20S_methyltransferase_complex::AR_coactivator_complex::17S_U2_snRNP::SF3A1-SF3A2-SF3A3_complex::SF3b_complex::Exon_junction_complex::SRm160/30…	0.002	245	ubiquitin-protein ligase activity: 0.035	nucleotide binding: 0.05475	RNA binding: 0.09431
1332	2	Q14147, Q8IZ69,	3.6667	1.6997	Q14147, Q8IZ69,	1	6.3333	2.0548	2.6666	1.732	0.225413							RNA methyltransferase activity: 0.0005331	RNA binding: 0.002461	ATP-dependent helicase activity: 0.01262	nucleotide binding: 0.05475
1600	2	P61586, O14974,	0.6667	0.4714	P61586, O14974,	1	1.3333	0.4714	0.6666	1.73189	0.225431	MRIP-MBS-RHOA_complex	0.6667	3	MRIP-MBS-RHOA_complex	0.6667	3	phosphatase regulator activity: 0.0006785	myosin binding: 0.003436	14-3-3 protein binding: 0.003774	enzyme inhibitor activity: 0.004016	protein domain specific binding: 0.0281	GTPase activity: 0.03547	signal transducer activity: 0.03654	protein kinase binding: 0.04735	GTP binding: 0.05351
1483	2	Q8WWY3, Q14186,	1.3333	0.4714	Q8WWY3, Q14186,	1	0.6667	0.4714	-0.6666	1.73189	0.225431	E2F5-RB2-DP1_complex::SMAD3-E2F4/5-p107-DP1_complex::SMAD3/4-E2F4/5-p107-DP1_complex	0.0714	7	E2F5-RB2-DP1_complex::SMAD3-E2F4/5-p107-DP1_complex::SMAD3/4-E2F4/5-p107-DP1_complex	0.0714	7	snRNP binding: 0.0002908	ribonucleoprotein complex binding: 0.002905	protein domain specific binding: 0.0281	transcription coactivator activity: 0.03209	transcription factor binding: 0.03817	RNA binding: 0.09431
585	2	Q9BRP8, Q99986,	0.6667	0.4714	Q9BRP8, Q99986,	1	1.3333	0.4714	0.6666	1.73189	0.225431	(E.F.G)_complex::12S_U11_snRNP::6S_methyltransferase_and_RG-containing_Sm_proteins_complex::20S_methylosome-SmD_complex::20S_methylosome_and_RG-containing_Sm_protein_complex::6S_methyltransferase_complex::JBP1-pICln_complex::SMN_complex,_U7_snRNA_specific::20S_methyltransferase_complex::AR_coactivator_complex::17S_U2_snRNP::SF3A1-SF3A2-SF3A3_complex::SF3b_complex::Exon_junction_complex::SRm160/30…	0.002	245	(E.F.G)_complex::12S_U11_snRNP::6S_methyltransferase_and_RG-containing_Sm_proteins_complex::20S_methylosome-SmD_complex::20S_methylosome_and_RG-containing_Sm_protein_complex::6S_methyltransferase_complex::JBP1-pICln_complex::SMN_complex,_U7_snRNA_specific::20S_methyltransferase_complex::AR_coactivator_complex::17S_U2_snRNP::SF3A1-SF3A2-SF3A3_complex::SF3b_complex::Exon_junction_complex::SRm160/30…	0.002	245	ribosome binding: 0.004209	transferase activity transferring phosphorus-containing groups: 0.01257	protein serine/threonine kinase activity: 0.06063	RNA binding: 0.09431
604	2	O15116, O00401,	1.3333	0.4714	O15116, O00401,	1	0.6667	0.4714	-0.6666	1.73189	0.225431	(E.F.G)_complex::12S_U11_snRNP::6S_methyltransferase_and_RG-containing_Sm_proteins_complex::20S_methylosome-SmD_complex::20S_methylosome_and_RG-containing_Sm_protein_complex::6S_methyltransferase_complex::JBP1-pICln_complex::SMN_complex,_U7_snRNA_specific::20S_methyltransferase_complex::AR_coactivator_complex::17S_U2_snRNP::SF3A1-SF3A2-SF3A3_complex::SF3b_complex::Exon_junction_complex::SRm160/30…	0.002	245	(E.F.G)_complex::12S_U11_snRNP::6S_methyltransferase_and_RG-containing_Sm_proteins_complex::20S_methylosome-SmD_complex::20S_methylosome_and_RG-containing_Sm_protein_complex::6S_methyltransferase_complex::JBP1-pICln_complex::SMN_complex,_U7_snRNA_specific::20S_methyltransferase_complex::AR_coactivator_complex::17S_U2_snRNP::SF3A1-SF3A2-SF3A3_complex::SF3b_complex::Exon_junction_complex::SRm160/30…	0.002	245	small GTPase regulator activity: 0.004981	actin binding: 0.05292	RNA binding: 0.09431
944	2	P40818, O75351,	1.3333	0.4714	P40818, O75351,	1	0.6667	0.4714	-0.6666	1.73189	0.225431							ATPase activity coupled: 0.002324	ubiquitin-specific protease activity: 0.009265	cysteine-type endopeptidase activity: 0.009937	ubiquitin thiolesterase activity: 0.01224	cysteine-type peptidase activity: 0.0141	SH3 domain binding: 0.01806	ATPase activity: 0.02096	protein C-terminus binding: 0.02857
1586	2	Q96RD0, P17028,	1.3333	0.4714	Q96RD0, P17028,	1	0.6667	0.4714	-0.6666	1.73189	0.225431							olfactory receptor activity: 0.02091	G-protein coupled receptor activity: 0.04143	sequence-specific DNA binding: 0.06516
109	10	Q9BUE0, O60244, Q9NPJ6, O75448, Q9Y2X0, Q9P086, Q15648, Q93074, Q9NX70, Q96G25,	1.6667	0.4714	Q9BUE0, O60244, Q9NPJ6, O75448, Q9Y2X0, Q9P086, Q15648, Q93074, Q9NX70, Q96G25,	1	2.3333	0.4714	0.6666	1.73189	0.225431	ARC-L_complex::ARC_complex::CCNC-CDK8-MED1-MED6-MED7_xcomplex::Mediator_complex_1::Mediator_complex_2::hMediator_complex_(MED23,_CDK8,_CCNC)::hMediator_complex_(MED23,_CDK8,_CCNC,_MED7)::ARC92-Mediator_complex::Mediator_complex::CRSP-Mediator_2_complex::CRSP_complex::MED18-MED20-MED29_mediator_subcomplex::NAT_complex::TRAP-SMCC_mediator_complex::PC2_complex::SMCC_complex::TRAP_complex::DRIP_compl…	0.2381	42	ARC-L_complex::ARC_complex::CCNC-CDK8-MED1-MED6-MED7_xcomplex::Mediator_complex_1::Mediator_complex_2::hMediator_complex_(MED23,_CDK8,_CCNC)::hMediator_complex_(MED23,_CDK8,_CCNC,_MED7)::ARC92-Mediator_complex::Mediator_complex::CRSP-Mediator_2_complex::CRSP_complex::MED18-MED20-MED29_mediator_subcomplex::NAT_complex::TRAP-SMCC_mediator_complex::PC2_complex::SMCC_complex::TRAP_complex::DRIP_compl…	0.2381	42	RNA polymerase II transcription cofactor activity: 7.019e-20	vitamin D receptor binding: 7.111e-17	thyroid hormone receptor binding: 8.468e-15	transcription cofactor activity: 1.761e-12	ligand-dependent nuclear receptor transcription coactivator activity: 4.005e-11	receptor activity: 1.042e-09	transcription coactivator activity: 2.644e-07	thyroid hormone receptor coactivator activity: 4.116e-06	mediator complex binding: 0.001453	LBD domain binding: 0.002902	peroxisome proliferator activated receptor binding: 0.009375	retinoic acid receptor binding: 0.01294	core promoter binding: 0.01318	ligand-dependent nuclear receptor binding: 0.01507	estrogen receptor binding: 0.01929	chromatin binding: 0.0246	histone acetyltransferase activity: 0.02696	sequence-specific DNA binding RNA polymerase II transcription factor activity: 0.04486	protein binding: 0.0564	beta-catenin binding: 0.05804
581	2	P30044, Q99497,	1.6667	0.4714	P30044, Q99497,	1	2.3333	0.4714	0.6666	1.73189	0.225431	PPD_complex	0.1667	3	PPD_complex	0.1667	3	peroxiredoxin activity: 4.23e-08	peroxidase activity: 1.27e-06	RNA polymerase III regulatory region DNA binding: 4.848e-05	peroxynitrite reductase activity: 4.848e-05	antioxidant activity: 0.002131	cysteine-type endopeptidase inhibitor activity involved in apoptotic process: 0.002469	peptidase activity: 0.01166	mRNA binding: 0.01348	protein dimerization activity: 0.0211	receptor binding: 0.03901	protein homodimerization activity: 0.08226
1787	2	Q96TA2, Q14318,	2.3333	0.4714	Q96TA2, Q14318,	1	1.6667	0.4714	-0.6666	1.73189	0.225431	CALM1-FKBP38-BCL2_complex::HSP90-FKBP38-CAM-Ca(2+)_complex	0.1	5	CALM1-FKBP38-BCL2_complex::HSP90-FKBP38-CAM-Ca(2+)_complex	0.1	5	FK506 binding: 0.002276	peptidyl-prolyl cis-trans isomerase activity: 0.006186	nucleoside-triphosphatase activity: 0.007631	metalloendopeptidase activity: 0.013	metal ion binding: 0.01922	identical protein binding: 0.06927
1289	2	Q7Z3B4, P49790,	2.3333	0.4714	Q7Z3B4, P49790,	1	1.6667	0.4714	-0.6666	1.73189	0.225431							nucleocytoplasmic transporter activity: 1.012e-06	protein anchor: 0.0005331	structural constituent of nuclear pore: 0.002228	transporter activity: 0.03017	identical protein binding: 0.06927
9	30	O00487, P51665, O00232, P28066, P28062, O14818, P20618, Q15008, P35998, P25786, P25787, P25788, P25789, P17980, P28074, P55036, P28070, P28072, Q13200, O43242, Q99436, Q99460, P49720, P49721, P62333, P62195, P60900, P62191, O00231, P43686,	4	1.633	O00487, P51665, O00232, P28066, P28062, O14818, P20618, Q15008, Q8TAA3, P25786, P25787, P25788, P25789, P17980, P28074, P55036, P28070, P28072, Q13200, P35998, O43242, Q99436, Q99460, P49720, P62191, P62333, P62195, P60900, P49721, O00231, P43686,	0.9677	1.6667	1.6997	-2.3333	1.7146	0.228553	20S_proteasome::26S_proteasome::PA700-20S-PA28_complex::PA28-20S_proteasome::PA700_complex::PA28gamma-20S_proteasome::Ubiquilin-proteasome_complex	0.7008	40	20S_proteasome::26S_proteasome::PA700-20S-PA28_complex::PA28-20S_proteasome::PA700_complex::PA28gamma-20S_proteasome::Ubiquilin-proteasome_complex	0.6782	40	threonine-type endopeptidase activity: 6.623e-35	ATPase activity: 2.282e-08	nucleoside-triphosphatase activity: 1.004e-07	endopeptidase activity: 3.286e-06	enzyme regulator activity: 6.203e-06	protein binding: 0.000114	lipopolysaccharide binding: 0.0005135	thyrotropin-releasing hormone receptor binding: 0.005069	purine ribonucleoside triphosphate binding: 0.007226	endopeptidase activator activity: 0.01151	peptidase activity: 0.01266	proteasome binding: 0.01717	TBP-class protein binding: 0.03716	NF-kappaB binding: 0.05373	metal ion binding: 0.05481	ATP binding: 0.08562	protein binding bridging: 0.09586
592	2	Q93009, Q6RFH5,	13	3.559	Q93009, Q6RFH5,	1	18.6667	4.4969	5.6667	1.71147	0.229125							p53 binding: 0.008688	ubiquitin-specific protease activity: 0.009265	cysteine-type endopeptidase activity: 0.009937	ubiquitin thiolesterase activity: 0.01224	cysteine-type peptidase activity: 0.0141	ubiquitin protein ligase binding: 0.0256	protein C-terminus binding: 0.02857	transcription factor binding: 0.03817	molecular_function: 0.06358
1079	2	P13929, P14618,	8	2.9439	P13929, P14618,	1	5	0.8165	-3	1.70085	0.231076							magnesium ion binding: 0.0002358	pyruvate kinase activity: 0.0005331	phosphopyruvate hydratase activity: 0.0009691	potassium ion binding: 0.001357	protein heterodimerization activity: 0.04915	protein homodimerization activity: 0.08226
818	2	Q9NPL8, P28288,	2.6667	0.9428	Q9NPL8, P28288,	1	1	1.4142	-1.6667	1.69847	0.231517							ATPase activity coupled to transmembrane movement of substances: 0.005174	ATPase activity: 0.02096	protein homodimerization activity: 0.08226
204	4	P62136, P51610, P62140, O15294,	26	5.099	P62136, P51610, P62140, O15294,	1	32.6667	4.4969	6.6667	1.69843	0.231524	OGT-TRAK1-TRAK2_complex	0.0833	3	OGT-TRAK1-TRAK2_complex	0.0833	3	histone acetyltransferase activity (H4-K5 specific): 2.113e-06	histone acetyltransferase activity (H4-K8 specific): 2.113e-06	histone acetyltransferase activity (H4-K16 specific): 2.113e-06	protein serine/threonine phosphatase activity: 5.875e-05	myosin phosphatase activity: 0.0004846	myosin-light-chain-phosphatase activity: 0.0004846	protein N-acetylglucosaminyltransferase activity: 0.0007753	acetylglucosaminyltransferase activity: 0.003867	ribonucleoprotein complex binding: 0.005793	phosphatidylinositol-3 4 5-trisphosphate binding: 0.006561	phosphoprotein phosphatase activity: 0.0101	enzyme activator activity: 0.01277	protein binding: 0.03228	hydrolase activity: 0.0563	transcription coactivator activity: 0.06212	metal ion binding: 0.08557	protein kinase binding: 0.09017	chromatin binding: 0.09605
563	2	O14980, Q9NUU7,	0	0	O14980, Q9NUU7,	1	1.6667	1.6997	1.6667	1.69842	0.231525	Snurportin-CRM1-RanGTP_complex	0.1667	3	Snurportin-CRM1-RanGTP_complex	0.1667	3	RNA binding: 0.002461	Ran GTPase binding: 0.005029	protein transporter activity: 0.01176	ATP-dependent helicase activity: 0.01262	protein domain specific binding: 0.0281	transporter activity: 0.03017
714	2	Q9P0S9, O75489,	0	0	Q9P0S9, O75489,	1	1.6667	1.6997	1.6667	1.69842	0.231525	Ecsit_complex_(ECSIT,_MT-CO2,_GAPDH,_TRAF6,_NDUFAF1)::Ecsit_complex_(ECSIT,_MT-CO2,_NDUFA1,_MT-ND1,_TRAF6,_NDUFAF1)::Ecsit_complex_(ECSIT,_NDUFS3,_NDUFAF1)::Ecsit_complex_(ECSIT,_NDUFS3,_TOM20)	0.0556	9	Ecsit_complex_(ECSIT,_MT-CO2,_GAPDH,_TRAF6,_NDUFAF1)::Ecsit_complex_(ECSIT,_MT-CO2,_NDUFA1,_MT-ND1,_TRAF6,_NDUFAF1)::Ecsit_complex_(ECSIT,_NDUFS3,_NDUFAF1)::Ecsit_complex_(ECSIT,_NDUFS3,_TOM20)	0.0556	9	NADH dehydrogenase activity: 0.0009691	NADH dehydrogenase (ubiquinone) activity: 0.005511	electron carrier activity: 0.01257
1805	2	P49406, Q9BQC6,	1.6667	1.6997					-1.6667	1.69842	0.231525							structural constituent of ribosome: 0.000149
359	15	P07814, O43324, P22314, P56192, P54136, P49588, Q13155, Q15046, P41250, Q9P2J5, P47897, Q9NSD9, P41252, Q12904, P14868,	32	5.7155	P07814, O43324, P22314, P56192, P54136, P49588, Q13155, Q15046, P41250, Q9P2J5, P47897, Q9NSD9, P41252, Q12904, P14868,	1	26.3333	0.9428	-5.6667	1.69437	0.232279	Multisynthetase_complex	0.7333	11	Multisynthetase_complex	0.7333	11	tRNA binding: 2.003e-10	ATP binding: 3.214e-09	aminoacyl-tRNA editing activity: 8.886e-08	aminoacyl-tRNA ligase activity: 2.571e-06	amino acid binding: 0.0003171	glycine-tRNA ligase activity: 0.0003636	proline-tRNA ligase activity: 0.0007269	glutamate-tRNA ligase activity: 0.001453	lysine-tRNA ligase activity: 0.001453	RNA stem-loop binding: 0.002178	glutamine-tRNA ligase activity: 0.00254	isoleucine-tRNA ligase activity: 0.00254	alanine-tRNA ligase activity: 0.002902	leucine-tRNA ligase activity: 0.002902	arginine binding: 0.003263	aspartate-tRNA ligase activity: 0.003263	arginine-tRNA ligase activity: 0.003263	methionine-tRNA ligase activity: 0.003625	phenylalanine-tRNA ligase activity: 0.004707	aminoacylase activity: 0.006148	small protein activating enzyme activity: 0.009731	protein binding: 0.03567	nucleic acid binding: 0.07708	ligase activity: 0.09138	cytokine activity: 0.09437
365	5	P62820, Q15907, P50395, P62491, P51149,	52.6667	3.8586	P62820, Q15907, P50395, P62491, P51149,	1	58.6667	4.7842	6	1.69081	0.23294							GTPase activity: 5.181e-07	GTP binding: 2.772e-06	GDP binding: 0.0001148	Rab GDP-dissociation inhibitor activity: 0.0009689	Rac GTPase binding: 0.009144	syntaxin binding: 0.01272	protein binding: 0.01368	Rab GTPase activator activity: 0.01862
1233	2	Q9BRA2, Q16881,	25.3333	2.357	Q9BRA2, Q16881,	1	27.6667	0.4714	2.3334	1.68141	0.234705							electron carrier activity: 3.987e-05	protein-disulfide reductase activity: 9.696e-05	selenate reductase activity: 0.0008238	mercury ion binding: 0.001018	NAD(P)H oxidase activity: 0.001453	thioredoxin-disulfide reductase activity: 0.001599	peroxidase activity: 0.002276	protein disulfide oxidoreductase activity: 0.004498	NADP binding: 0.006957	flavin adenine dinucleotide binding: 0.0132	protein homodimerization activity: 0.08226
1004	2	O60488, O95573,	86	3.7417	O60488, O95573,	1	78.6667	6.5997	-7.3333	1.67422	0.236066							long-chain fatty acid-CoA ligase activity: 1.163e-06	arachidonate-CoA ligase activity: 0.0002908	catalytic activity: 0.000467	very long-chain fatty acid-CoA ligase activity: 0.001114	ATP binding: 0.0148	protein domain specific binding: 0.0281	protein kinase binding: 0.04735
1213	2	Q9P270, Q9H0B6,	7.3333	3.0912	Q9P270, Q9H0B6,	1	4	1.633	-3.3333	1.65143	0.240448							kinesin binding: 0.004788	microtubule motor activity: 0.01176
53	9	Q12873, Q09028, O95983, Q92769, Q14839, Q86YP4, Q16576, Q13547, O94776,	2.3333	0.4714	Q12873, Q09028, O95983, Q92769, Q14839, O94776, Q16576, Q13547, Q86YP4,	1	1.3333	0.9428	-1	1.64318	0.24206	ALL-1_supercomplex::SIN3_complex::Sin3_complex::mSin3A-HDAC1-HDAC2_complex::mSin3A_complex::MeCP2-SIN3A-HDAC_complex::MAD1-mSin3A-HDAC2_complex::PU.1-SIN3A-HDAC_complex::SMARCA2/BRM-BAF57-MECP2_complex::hNURF_complex	0.1601	34	ALL-1_supercomplex::SIN3_complex::Sin3_complex::mSin3A-HDAC1-HDAC2_complex::mSin3A_complex::MeCP2-SIN3A-HDAC_complex::MAD1-mSin3A-HDAC2_complex::PU.1-SIN3A-HDAC_complex::SMARCA2/BRM-BAF57-MECP2_complex::hNURF_complex	0.1601	34	RNA polymerase II repressing transcription factor binding: 3.149e-09	histone deacetylase activity: 8.61e-07	hydrolase activity acting on acid anhydrides in phosphorus-containing anhydrides: 2.503e-05	protein deacetylase activity: 5.349e-05	NAD-dependent histone deacetylase activity (H4-K16 specific): 0.0001386	NAD-dependent histone deacetylase activity (H3-K18 specific): 0.0001489	NAD-dependent histone deacetylase activity (H3-K14 specific): 0.0001669	NAD-dependent histone deacetylase activity (H3-K9 specific): 0.0001706	ATP-dependent DNA helicase activity: 0.000227	protein binding: 0.0004412	transcription factor binding: 0.0005487	histone deacetylase binding: 0.0008628	transcription factor binding transcription factor activity: 0.0008721	chromatin binding: 0.001256	sequence-specific DNA binding transcription factor activity: 0.001584	sequence-specific DNA binding: 0.002617	zinc ion binding: 0.004542	enzyme binding: 0.01166	core promoter binding: 0.01187	chromatin DNA binding: 0.01613	RNA polymerase II transcription corepressor activity: 0.0174	RNA polymerase II transcription factor binding: 0.01993	activating transcription factor binding: 0.02077	protein binding bridging: 0.03097	DNA-dependent ATPase activity: 0.03528	histone binding: 0.03975	helicase activity: 0.04599	ATP-dependent helicase activity: 0.05433	DNA binding: 0.07213
1637	2	Q9NQP4, P00519,	10.3333	0.4714	Q9NQP4, P00519,	1	11.3333	0.9428	1	1.64318	0.24206	Prefoldin::Prefoldin_complex	0.0833	6	Prefoldin::Prefoldin_complex	0.0833	6	nicotinate-nucleotide adenylyltransferase activity: 0.0005331	mitogen-activated protein kinase binding: 0.001792	actin monomer binding: 0.002324	proline-rich region binding: 0.002953	syntaxin binding: 0.005126	manganese ion binding: 0.006186	chaperone binding: 0.006427	non-membrane spanning protein tyrosine kinase activity: 0.007631	unfolded protein binding: 0.01578	protein tyrosine kinase activity: 0.01716	SH3 domain binding: 0.01806	protein C-terminus binding: 0.02857	magnesium ion binding: 0.03026
316	6	P22307, P09110, P23284, O43615, P29558, Q8IWZ8,	1.3333	0.9428	P22307, P09110, P23284, O43615, P29558, Q8IWZ8,	1	0.3333	0.4714	-1	1.64318	0.24206	TIM_(TIMM17ab,_TIMM23,_TIMM44)_complex,_mitochondrial	0.0417	4	TIM_(TIMM17ab,_TIMM23,_TIMM44)_complex,_mitochondrial	0.0417	4	transferase activity transferring acyl groups other than amino-acyl groups: 3.207e-05	long-chain fatty acyl-CoA binding: 0.0005815	propanoyl-CoA C-acyltransferase activity: 0.0005815	oleic acid binding: 0.0005815	P-P-bond-hydrolysis-driven protein transmembrane transporter activity: 0.001598	palmitoyl-CoA oxidase activity: 0.002178	acetyl-CoA C-acyltransferase activity: 0.002902	sterol binding: 0.003191	phosphatidylinositol transporter activity: 0.003914	protein binding: 0.005797	fatty-acyl-CoA binding: 0.009094	peptide binding: 0.01465	cholesterol binding: 0.01664	peptidyl-prolyl cis-trans isomerase activity: 0.01833	RNA binding: 0.03012	single-stranded DNA binding: 0.03143	double-stranded DNA binding: 0.04423	unfolded protein binding: 0.04584
982	2	Q6PHR2, Q6UXN9,	21.3333	0.9428	Q6PHR2, Q6UXN9,	1	20.3333	0.4714	-1	1.64318	0.24206	MLL-HCF_complex::MLL1-WDR5_complex::MOF_complex::Set1A_complex::Set1B_complex::MSL_complex	0.0139	36	MLL-HCF_complex::MLL1-WDR5_complex::MOF_complex::Set1A_complex::Set1B_complex::MSL_complex	0.0139	36	histone methyltransferase activity (H3-K4 specific): 0.00155	transferase activity transferring phosphorus-containing groups: 0.01257	chromatin binding: 0.05062	protein kinase activity: 0.05461	protein serine/threonine kinase activity: 0.06063
863	2	Q86UV5, Q9BZF9,	10.6667	0.4714	Q86UV5, Q9BZF9,	1	9.6667	0.9428	-1	1.64318	0.24206							ubiquitin thiolesterase activity: 0.01224	cysteine-type peptidase activity: 0.0141	molecular_function: 0.06358
930	2	Q9ULM3, Q01658,	3.6667	0.4714	Q9ULM3, Q01658,	1	2.6667	0.9428	-1	1.64318	0.24206							TBP-class protein binding: 1.619e-06	transcription corepressor activity: 0.02697	transcription factor binding: 0.03817	protein heterodimerization activity: 0.04915	sequence-specific DNA binding: 0.06516
1089	2	Q9P2N5, O75152,	1.6667	0.4714	Q9P2N5, O75152,	1	0.6667	0.9428	-1	1.64318	0.24206							metal ion binding: 0.01922	nucleotide binding: 0.05475	RNA binding: 0.09431
1237	2	Q96KP4, Q92747,	3.6667	0.4714	Q96KP4, Q92747,	1	2.6667	0.9428	-1	1.64318	0.24206							tripeptidase activity: 0.00063	dipeptidase activity: 0.002276	carboxypeptidase activity: 0.004643	metallopeptidase activity: 0.01046	actin binding: 0.05292
220	5	Q15554, P49959, Q92878, Q9NYB0, O60934,	32.6667	2.0548	Q15554, P49959, Q92878, Q9NYB0, O60934,	1	34.6667	0.4714	2	1.64317	0.242062	Rap1_complex::TERF2-RAP1_complex::TIN2_complex::TRF1-TIN2_complex::TRF2-Ku_complex::TRF2-Rap1_complex_II::Telosome_complex::TRF-Rap1_complex_I,_2MD::TRF1_telomere_length_regulation_complex::Tankyrin_1-tankyrin_2-TRF1_complex	0.2462	13	Rap1_complex::TERF2-RAP1_complex::TIN2_complex::TRF1-TIN2_complex::TRF2-Ku_complex::TRF2-Rap1_complex_II::Telosome_complex::TRF-Rap1_complex_I,_2MD::TRF1_telomere_length_regulation_complex::Tankyrin_1-tankyrin_2-TRF1_complex	0.2462	13	ATP-dependent DNA helicase activity: 1.594e-07	single-stranded DNA endodeoxyribonuclease activity: 6.191e-06	telomeric DNA binding: 1.16e-05	3'-5' exonuclease activity: 2.358e-05	nuclease activity: 2.906e-05	protein C-terminus binding: 0.002008	double-stranded telomeric DNA binding: 0.002057	endodeoxyribonuclease activity: 0.003264	exonuclease activity: 0.00998	protein binding: 0.01368	DNA binding: 0.01457	manganese ion binding: 0.01532	endonuclease activity: 0.01627	protein binding bridging: 0.01745	damaged DNA binding: 0.02969	protein N-terminus binding: 0.0368	double-stranded DNA binding: 0.03714	transcription factor binding: 0.08997
1341	2	Q15836, P08195,	12.3333	0.4714	Q15836, P08195,	1	10.3333	2.0548	-2	1.64317	0.242062	SNARE_complex_(HGS,_SNAP25,_STX13)::SNARE_complex_(SNAP25,_VAMP3,_VAMP2,_NAPB,_STX13)::SNARE_complex_(VAMP2,_SNAP25,_STX13)	0.0833	6	SNARE_complex_(HGS,_SNAP25,_STX13)::SNARE_complex_(SNAP25,_VAMP3,_VAMP2,_NAPB,_STX13)::SNARE_complex_(VAMP2,_SNAP25,_STX13)	0.0833	6	cation binding: 0.001357	calcium:sodium antiporter activity: 0.001357	neutral amino acid transmembrane transporter activity: 0.00155	syntaxin-1 binding: 0.00334	catalytic activity: 0.04231
506	8	Q9Y3B7, P49406, Q6P1L8, Q9NX20, Q9P015, Q9NWU5, Q5T653, Q9BYD1,	1.6667	1.6997	Q9Y3B7, P49406, Q6P1L8, Q9NX20, Q9P015, Q9NWU5, Q5T653, Q9BYD1,	1	3.6667	1.2472	2	1.64316	0.242065							structural constituent of ribosome: 4.695e-16	rRNA binding: 0.01285
805	2	O43765, P30520,	4.3333	1.6997	O43765, P30520,	1	6.3333	1.2472	2	1.64316	0.242065							adenylosuccinate synthase activity: 0.0002908	phosphate ion binding: 0.002034	magnesium ion binding: 0.03026	GTP binding: 0.05351
895	2	Q7Z478, Q9BWT3,	5.6667	0.4714	Q7Z478, Q9BWT3,	1	7.3333	1.6997	1.6666	1.63655	0.243368							polynucleotide adenylyltransferase activity: 0.0009207	ribosomal small subunit binding: 0.001211	translation initiation factor activity: 0.01123	ATP-dependent helicase activity: 0.01262	ATP binding: 0.0148	RNA binding: 0.09431
1273	2	Q8WU90, Q92558,	9	2.1602	Q8WU90, Q92558,	1	6.6667	1.2472	-2.3333	1.62019	0.246627							actin binding: 0.05292
49	61	P62851, P18621, P50914, P62857, P05388, P62979, P39019, P46782, P62910, P84098, P62424, P46776, P61513, P62913, P62280, P30050, P62854, P62753, P62750, P52272, P25398, P62899, Q07020, P26373, P62266, P62241, P36578, P62244, P62263, P62249, P62917, P62277, P32969, Q02543, P62906, P39023, P83731, P46777, P23396, P61313, P46778, P62829, P35268, P15880, P08708, P61247, Q12906, P08865, P18124, P63244,…	15	2.1602	P62851, P18621, P50914, P62857, P05388, P62979, P39019, P46782, P62910, P84098, P62424, P46776, P61513, P62913, P62280, P30050, P62854, P62753, P62750, P52272, P25398, P62899, Q07020, P26373, P62266, P62241, P36578, P62244, P62263, P62249, P62917, P62277, P32969, Q02543, P62906, P39023, P83731, P46777, P23396, P61313, P46778, P62829, P35268, P15880, P08708, P61247, Q12906, P08865, P18124, P63244,…	1	10.6667	4.1096	-4.3333	1.6166	0.247351	40S_ribosomal_subunit,_cytoplasmic::Nop56p-associated_pre-rRNA_complex::TRBP_containing_complex_(DICER,_RPL7A,_EIF6,_MOV10_and_subunits_of_the_60S_ribosomal_particle)::DICER1-NCOA6-AGO2_complex::RNA-induced_silencing_complex,_RISC::TRBP_containing_complex_(DICER,_TRBP,_AGO2,_RPL7A,_EIF6,_MOV10)::FIB-associated_protein_complex	0.4129	129	40S_ribosomal_subunit,_cytoplasmic::Nop56p-associated_pre-rRNA_complex::TRBP_containing_complex_(DICER,_RPL7A,_EIF6,_MOV10_and_subunits_of_the_60S_ribosomal_particle)::DICER1-NCOA6-AGO2_complex::RNA-induced_silencing_complex,_RISC::TRBP_containing_complex_(DICER,_TRBP,_AGO2,_RPL7A,_EIF6,_MOV10)::FIB-associated_protein_complex	0.4129	129	structural constituent of ribosome: 1.321e-108	RNA binding: 7.185e-33	rRNA binding: 7.462e-10	mRNA binding: 3.565e-06	cysteine-type endopeptidase activator activity involved in apoptotic process: 0.002857	fibroblast growth factor binding: 0.006368	laminin receptor activity: 0.008807	5S rRNA binding: 0.008807	protein tyrosine kinase inhibitor activity: 0.01026	mRNA 5'-UTR binding: 0.01603	ion channel inhibitor activity: 0.01603	metal ion binding: 0.01664	translation regulator activity: 0.02456	DNA binding: 0.03193	translation initiation factor binding: 0.04523	protein kinase A binding: 0.05324	translation activator activity: 0.05456	DNA N-glycosylase activity: 0.05719	DNA-(apurinic or apyrimidinic site) lyase activity: 0.06499	protein binding: 0.07334	laminin binding: 0.07643	enzyme binding: 0.08329	iron-sulfur cluster binding: 0.0948
1474	2	Q96PU4, Q6IBS0,	25	1.633	Q96PU4, Q6IBS0,	1	23	1.4142	-2	1.60357	0.249999							actin monomer binding: 0.002324	phosphatidylinositol-4 5-bisphosphate binding: 0.005415	protein kinase C binding: 0.006234	histone binding: 0.009121	ubiquitin-protein ligase activity: 0.035	actin binding: 0.05292
1840	50	P62851, P18621, P62854, P62857, Q07020, P05388, P39019, P62910, P62424, P46776, P30050, P62913, Q02543, P50914, P62753, P62750, P62899, Q12906, P26373, P62266, P62241, P36578, P62244, P62263, Q71UM5, P62249, P62917, P63220, P62906, P39023, P83731, P46777, P23396, P61313, P46778, P62829, P35268, P15880, O00264, P61247, P08865, P18124, P84098, P62701, P19338, P62277, P60866, P32969, Q02878, P61513,	13	4.9666	P62851, P18621, P62854, P62857, P05388, P39019, P62910, P62424, P46776, P30050, P62913, Q02543, P50914, P62753, P62750, P62899, Q12906, P26373, P62266, P62241, P36578, P62244, P62263, Q71UM5, P62249, P62917, P62277, P63220, P62906, P39023, P83731, P46777, P23396, P61313, P46778, P62829, P35268, P15880, O00264, P61247, P08865, P18124, P84098, P62701, P19338, Q07020, P60866, P32969, Q02878, P61513,	1	8	2.1602	-5	1.599	0.250937	40S_ribosomal_subunit,_cytoplasmic::Nop56p-associated_pre-rRNA_complex::TRBP_containing_complex_(DICER,_RPL7A,_EIF6,_MOV10_and_subunits_of_the_60S_ribosomal_particle)::DICER1-NCOA6-AGO2_complex::RNA-induced_silencing_complex,_RISC::TRBP_containing_complex_(DICER,_TRBP,_AGO2,_RPL7A,_EIF6,_MOV10)::FIB-associated_protein_complex	0.3572	129	40S_ribosomal_subunit,_cytoplasmic::Nop56p-associated_pre-rRNA_complex::TRBP_containing_complex_(DICER,_RPL7A,_EIF6,_MOV10_and_subunits_of_the_60S_ribosomal_particle)::DICER1-NCOA6-AGO2_complex::RNA-induced_silencing_complex,_RISC::TRBP_containing_complex_(DICER,_TRBP,_AGO2,_RPL7A,_EIF6,_MOV10)::FIB-associated_protein_complex	0.3572	129	structural constituent of ribosome: 2.597e-87	RNA binding: 7.627e-33	rRNA binding: 1.921e-08	mRNA binding: 2.179e-05	fibroblast growth factor binding: 0.004355	laminin receptor activity: 0.007229	5S rRNA binding: 0.007229	mRNA 5'-UTR binding: 0.01317	metal ion binding: 0.01818	translation regulator activity: 0.02022	protein binding: 0.02887	protein kinase A binding: 0.04407	translation activator activity: 0.04518	DNA N-glycosylase activity: 0.04738	telomeric DNA binding: 0.05176	DNA-(apurinic or apyrimidinic site) lyase activity: 0.05393	cysteine-type endopeptidase activator activity involved in apoptotic process: 0.06145	laminin binding: 0.06357	DNA binding: 0.07451	iron-sulfur cluster binding: 0.07918	nucleic acid binding: 0.07934	steroid binding: 0.08121	NF-kappaB binding: 0.08626	protein kinase binding: 0.08824	ribosome binding: 0.09519
801	2	Q9Y5P6, Q96IJ6,	101.333	3.2998	Q9Y5P6, Q96IJ6,	1	105.333	2.8674	4	1.58483	0.253872							mannose-1-phosphate guanylyltransferase activity: 1.175e-08	GTP binding: 0.0007563	nucleotidyltransferase activity: 0.004498
1188	2	P55081, O15042,	42	2.4495	P55081, O15042,	1	46.6667	4.4969	4.6667	1.57847	0.255204	(E.F.G)_complex::12S_U11_snRNP::6S_methyltransferase_and_RG-containing_Sm_proteins_complex::20S_methylosome-SmD_complex::20S_methylosome_and_RG-containing_Sm_protein_complex::6S_methyltransferase_complex::JBP1-pICln_complex::SMN_complex,_U7_snRNA_specific::20S_methyltransferase_complex::AR_coactivator_complex::17S_U2_snRNP::SF3A1-SF3A2-SF3A3_complex::SF3b_complex::Exon_junction_complex::SRm160/30…	0.0082	245	(E.F.G)_complex::12S_U11_snRNP::6S_methyltransferase_and_RG-containing_Sm_proteins_complex::20S_methylosome-SmD_complex::20S_methylosome_and_RG-containing_Sm_protein_complex::6S_methyltransferase_complex::JBP1-pICln_complex::SMN_complex,_U7_snRNA_specific::20S_methyltransferase_complex::AR_coactivator_complex::17S_U2_snRNP::SF3A1-SF3A2-SF3A3_complex::SF3b_complex::Exon_junction_complex::SRm160/30…	0.0082	245	nucleotide binding: 0.05475	molecular_function: 0.06358	RNA binding: 0.09431
1182	2	P12814, Q05682,	114	0.8165	P12814, Q05682,	1	119.667	6.1824	5.6667	1.57391	0.256165	CAS-SRC-FAK_complex::Polycystin-1_multiprotein_complex_(ACTN1,_CDH1,_SRC,_JUP,_VCL,_CTNNB1,_PXN,_BCAR1,_PKD1,_PTK2,_TLN1)::Polycystin-1-E-cadherin-beta-catenin_complex::Polycystin-1-E-cadherin-beta-catenin-Flotillin-2_complex::PXN-ITGB5-PTK2_complex	0.0385	13	CAS-SRC-FAK_complex::Polycystin-1_multiprotein_complex_(ACTN1,_CDH1,_SRC,_JUP,_VCL,_CTNNB1,_PXN,_BCAR1,_PKD1,_PTK2,_TLN1)::Polycystin-1-E-cadherin-beta-catenin_complex::Polycystin-1-E-cadherin-beta-catenin-Flotillin-2_complex::PXN-ITGB5-PTK2_complex	0.0385	13	actin binding: 0.000739	tropomyosin binding: 0.003098	myosin binding: 0.003436	vinculin binding: 0.004257	ion channel binding: 0.01157	integrin binding: 0.01329	actin filament binding: 0.01611	calmodulin binding: 0.02499	protein domain specific binding: 0.0281	calcium ion binding: 0.09204
64	9	P59998, P61158, P61160, O15511, Q9BPX5, O15143, O15144, O15145, Q92747,	117.333	1.6997	P59998, P61158, P61160, O15511, Q9BPX5, O15143, O15144, O15145, Q92747,	1	122.333	5.3125	5	1.55263	0.260707	Arp2/3_protein_complex	0.7778	7	Arp2/3_protein_complex	0.7778	7	actin binding: 2.558e-12	structural constituent of cytoskeleton: 4.695e-07	Arp2/3 complex binding: 0.00109	AP-1 adaptor complex binding: 0.00109	kinesin binding: 0.02119	protein binding bridging: 0.03097	actin filament binding: 0.06848
1606	2	Q15645, P51151,	7.3333	2.6247	Q15645, P51151,	1	10	1.4142	2.6667	1.5492	0.261449	RAB9-TIP47-MPRI_complex	0.1667	3	RAB9-TIP47-MPRI_complex	0.1667	3	GDP binding: 0.006812	nucleoside-triphosphatase activity: 0.007631	transcription cofactor activity: 0.009121	GTPase activity: 0.03547	GTP binding: 0.05351	identical protein binding: 0.06927
1494	2	Q92889, P07992,	3	1.4142	Q92889, P07992,	1	1.6667	0.4714	-1.3333	1.54917	0.261456	ERCC1-ERCC4-MSH2_complex::RAD52-ERCC4-ERCC1_complex::XPA-ERCC1-ERCC4_complex	0.4	5	ERCC1-ERCC4-MSH2_complex::RAD52-ERCC4-ERCC1_complex::XPA-ERCC1-ERCC4_complex	0.4	5	TFIID-class transcription factor binding: 6.463e-08	single-stranded DNA endodeoxyribonuclease activity: 6.205e-07	structure-specific DNA binding: 9.636e-07	single-stranded DNA binding: 2.883e-05	damaged DNA binding: 3.687e-05	protein C-terminus binding: 0.0002098	endodeoxyribonuclease activity: 0.001308	TBP-class protein binding: 0.002566	endonuclease activity: 0.006572	protein N-terminus binding: 0.01506	protein domain specific binding: 0.0281
223	11	Q9BUE0, O60244, Q9NPJ6, O75448, Q9Y2X0, Q9P086, Q15648, Q9UHV7, Q93074, Q96G25, Q13503,	5	1.4142	Q93074, O60244, Q9NPJ6, O75448, Q9Y2X0, Q9P086, Q15648, Q9UHV7, Q9BUE0, Q96G25, Q13503,	1	3.6667	0.4714	-1.3333	1.54917	0.261456	ARC-L_complex::ARC_complex::CCNC-CDK8-MED1-MED6-MED7_xcomplex::Mediator_complex_1::Mediator_complex_2::hMediator_complex_(MED23,_CDK8,_CCNC)::hMediator_complex_(MED23,_CDK8,_CCNC,_MED7)::ARC92-Mediator_complex::Mediator_complex::CRSP-Mediator_2_complex::CRSP_complex::MED18-MED20-MED29_mediator_subcomplex::NAT_complex::TRAP-SMCC_mediator_complex::PC2_complex::SMCC_complex::TRAP_complex::DRIP_compl…	0.2619	42	ARC-L_complex::ARC_complex::CCNC-CDK8-MED1-MED6-MED7_xcomplex::Mediator_complex_1::Mediator_complex_2::hMediator_complex_(MED23,_CDK8,_CCNC)::hMediator_complex_(MED23,_CDK8,_CCNC,_MED7)::ARC92-Mediator_complex::Mediator_complex::CRSP-Mediator_2_complex::CRSP_complex::MED18-MED20-MED29_mediator_subcomplex::NAT_complex::TRAP-SMCC_mediator_complex::PC2_complex::SMCC_complex::TRAP_complex::DRIP_compl…	0.2619	42	RNA polymerase II transcription cofactor activity: 2.059e-22	vitamin D receptor binding: 8.399e-20	thyroid hormone receptor binding: 2.355e-17	transcription cofactor activity: 1.228e-14	ligand-dependent nuclear receptor transcription coactivator activity: 1.976e-13	receptor activity: 2.144e-11	transcription coactivator activity: 9.218e-11	thyroid hormone receptor coactivator activity: 5.029e-06	mediator complex binding: 0.001598	LBD domain binding: 0.003191	peroxisome proliferator activated receptor binding: 0.0103	retinoic acid receptor binding: 0.01421	core promoter binding: 0.01447	ligand-dependent nuclear receptor binding: 0.01655	estrogen receptor binding: 0.02118	DNA-directed RNA polymerase activity: 0.02882	chromatin binding: 0.02929	histone acetyltransferase activity: 0.02957	sequence-specific DNA binding RNA polymerase II transcription factor activity: 0.04911	beta-catenin binding: 0.06345
1510	2	P53778, Q9Y6N7,	4	1.4142	P53778, Q9Y6N7,	1	2.6667	0.4714	-1.3333	1.54917	0.261456							LRR domain binding: 0.0005816	axon guidance receptor activity: 0.0008723	MAP kinase activity: 0.00305	magnesium ion binding: 0.03026	protein heterodimerization activity: 0.04915	protein kinase activity: 0.05461	protein serine/threonine kinase activity: 0.06063	identical protein binding: 0.06927
575	2	Q9NR33, O43318,	4.3333	1.2472	Q9NR33, O43318,	1	3	0.8165	-1.3333	1.54917	0.261456	STAT3-NLK-MAP3K7_complex	0.1667	3	STAT3-NLK-MAP3K7_complex	0.1667	3	MAP kinase kinase activity: 0.002518	MAP kinase kinase kinase activity: 0.002615	DNA-directed DNA polymerase activity: 0.005656	magnesium ion binding: 0.03026	protein heterodimerization activity: 0.04915	protein kinase activity: 0.05461	protein serine/threonine kinase activity: 0.06063	sequence-specific DNA binding: 0.06516
1300	2	Q5T4S7, P37275,	3.3333	1.2472	Q5T4S7, P37275,	1	2	0.8165	-1.3333	1.54917	0.261456	ATR-HDAC2-CHD4_complex::Anti-HDAC2_complex::BHC_complex::HDAC1-associated_core_complex_cI::NRD_complex_(Nucleosome_remodeling_and_deacetylation_complex)::XFIM_complex::anti-BHC110_complex::BHC110_complex::CoREST-HDAC_complex::MTA2_complex::Mi2/NuRD_complex::HDAC1-associated_protein_complex::MeCP1_complex::HDAC1-associated_core_complex_cII::HDAC2-asscociated_core_complex::BRAF53-BRCA2_complex::MTA…	0.0081	62	ATR-HDAC2-CHD4_complex::Anti-HDAC2_complex::BHC_complex::HDAC1-associated_core_complex_cI::NRD_complex_(Nucleosome_remodeling_and_deacetylation_complex)::XFIM_complex::anti-BHC110_complex::BHC110_complex::CoREST-HDAC_complex::MTA2_complex::Mi2/NuRD_complex::HDAC1-associated_protein_complex::MeCP1_complex::HDAC1-associated_core_complex_cII::HDAC2-asscociated_core_complex::BRAF53-BRCA2_complex::MTA…	0.0081	62	E-box binding: 0.003774	zinc ion binding: 0.007537	ligase activity: 0.01329	double-stranded DNA binding: 0.0152	calmodulin binding: 0.02499	transcription corepressor activity: 0.02697	transcription coactivator activity: 0.03209	ubiquitin-protein ligase activity: 0.035	transcription factor binding: 0.03817	chromatin binding: 0.05062	sequence-specific DNA binding: 0.06516
749	2	Q15366, P68104,	1.6667	1.2472	Q15366, P68104,	1	3	0.8165	1.3333	1.54917	0.261456	40S_ribosomal_subunit,_cytoplasmic::Nop56p-associated_pre-rRNA_complex::TRBP_containing_complex_(DICER,_RPL7A,_EIF6,_MOV10_and_subunits_of_the_60S_ribosomal_particle)::DICER1-NCOA6-AGO2_complex::RNA-induced_silencing_complex,_RISC::TRBP_containing_complex_(DICER,_TRBP,_AGO2,_RPL7A,_EIF6,_MOV10)::FIB-associated_protein_complex	0.0039	129	40S_ribosomal_subunit,_cytoplasmic::Nop56p-associated_pre-rRNA_complex::TRBP_containing_complex_(DICER,_RPL7A,_EIF6,_MOV10_and_subunits_of_the_60S_ribosomal_particle)::DICER1-NCOA6-AGO2_complex::RNA-induced_silencing_complex,_RISC::TRBP_containing_complex_(DICER,_TRBP,_AGO2,_RPL7A,_EIF6,_MOV10)::FIB-associated_protein_complex	0.0039	129	translation elongation factor activity: 0.004016	ubiquitin protein ligase binding: 0.0256	GTPase activity: 0.03547	enzyme binding: 0.0378	protein kinase binding: 0.04735	GTP binding: 0.05351	RNA binding: 0.09431
26	62	P62851, P30050, P62854, P62857, P50914, P62899, P05388, P62979, P39019, P18621, Q12906, P62910, P62424, P61513, P62913, P62280, Q02543, P46777, P62753, P62750, P52272, P25398, P55769, P46782, P62081, P62266, P62241, P36578, P62244, P62263, Q71UM5, P62249, P62917, P62277, P26373, P32969, P62906, P39023, P83731, P22087, P23396, P61313, P46778, P84098, P35268, P15880, P08708, P61247, P08865, P18124,…	6	0.8165	P62851, P30050, P62854, P62857, P50914, P62899, P05388, P62979, P39019, P18621, Q12906, P62910, P62424, P61513, P62913, P62280, Q02543, P46777, P62753, P62750, P52272, P25398, P55769, P46782, P62081, P62266, P62241, P36578, P62244, P62263, Q71UM5, P62249, P62917, P62277, P26373, P32969, P62906, P39023, P83731, P22087, P23396, P61313, P46778, P84098, P35268, P15880, P08708, P61247, P08865, P18124,…	1	9	3.266	3	1.54348	0.262693	40S_ribosomal_subunit,_cytoplasmic::Nop56p-associated_pre-rRNA_complex::TRBP_containing_complex_(DICER,_RPL7A,_EIF6,_MOV10_and_subunits_of_the_60S_ribosomal_particle)::DICER1-NCOA6-AGO2_complex::RNA-induced_silencing_complex,_RISC::TRBP_containing_complex_(DICER,_TRBP,_AGO2,_RPL7A,_EIF6,_MOV10)::FIB-associated_protein_complex	0.4352	129	40S_ribosomal_subunit,_cytoplasmic::Nop56p-associated_pre-rRNA_complex::TRBP_containing_complex_(DICER,_RPL7A,_EIF6,_MOV10_and_subunits_of_the_60S_ribosomal_particle)::DICER1-NCOA6-AGO2_complex::RNA-induced_silencing_complex,_RISC::TRBP_containing_complex_(DICER,_TRBP,_AGO2,_RPL7A,_EIF6,_MOV10)::FIB-associated_protein_complex	0.4352	129	structural constituent of ribosome: 2.142e-104	RNA binding: 5.72e-34	rRNA binding: 8.249e-10	mRNA binding: 3.92e-06	fibroblast growth factor binding: 0.006568	laminin receptor activity: 0.008951	5S rRNA binding: 0.008951	metal ion binding: 0.01506	mRNA 5'-UTR binding: 0.01629	translation regulator activity: 0.02495	DNA binding: 0.0294	snoRNA binding: 0.04319	translation initiation factor binding: 0.04593	protein kinase A binding: 0.05406	translation activator activity: 0.0554	DNA N-glycosylase activity: 0.05807	protein binding: 0.06424	DNA-(apurinic or apyrimidinic site) lyase activity: 0.06598	cysteine-type endopeptidase activator activity involved in apoptotic process: 0.07503	laminin binding: 0.07758	iron-sulfur cluster binding: 0.09619
272	4	P62256, Q06830, Q9BRA2, P45974,	7.3333	2.0548	P62256, Q06830, Q9BRA2, P45974,	1	5	1.633	-2.3333	1.53977	0.263503							peroxidase activity: 7.605e-06	protein-disulfide reductase activity: 0.0001939	thioredoxin peroxidase activity: 0.0006784	omega peptidase activity: 0.005793	acid-amino acid ligase activity: 0.01144	cysteine-type endopeptidase activity: 0.01968	ubiquitin thiolesterase activity: 0.02418	electron carrier activity: 0.02483	protein binding: 0.03228	heme binding: 0.034	ubiquitin-protein ligase activity: 0.06753
1331	2	O14757, Q96RN5,	13.3333	3.0912	O14757, Q96RN5,	1	9.3333	3.2998	-4	1.53227	0.265151	ARC-L_complex::ARC_complex::CCNC-CDK8-MED1-MED6-MED7_xcomplex::Mediator_complex_1::Mediator_complex_2::hMediator_complex_(MED23,_CDK8,_CCNC)::hMediator_complex_(MED23,_CDK8,_CCNC,_MED7)::ARC92-Mediator_complex::Mediator_complex::CRSP-Mediator_2_complex::CRSP_complex::MED18-MED20-MED29_mediator_subcomplex::NAT_complex::TRAP-SMCC_mediator_complex::PC2_complex::SMCC_complex::TRAP_complex::DRIP_compl…	0.0119	42	ARC-L_complex::ARC_complex::CCNC-CDK8-MED1-MED6-MED7_xcomplex::Mediator_complex_1::Mediator_complex_2::hMediator_complex_(MED23,_CDK8,_CCNC)::hMediator_complex_(MED23,_CDK8,_CCNC,_MED7)::ARC92-Mediator_complex::Mediator_complex::CRSP-Mediator_2_complex::CRSP_complex::MED18-MED20-MED29_mediator_subcomplex::NAT_complex::TRAP-SMCC_mediator_complex::PC2_complex::SMCC_complex::TRAP_complex::DRIP_compl…	0.0119	42	histone kinase activity (H3-T11 specific): 0.00063	RNA polymerase II transcription cofactor activity: 0.005174	protein serine/threonine kinase activity: 0.06063
1200	2	P23588, Q9H814,	2	0.8165	P23588, Q9H814,	1	3.6667	1.6997	1.6667	1.53094	0.265445							toxic substance binding: 0.0009207	RNA binding: 0.002461	translation initiation factor activity: 0.01123	nucleotide binding: 0.05475
1464	2	Q9GZL7, Q15785,	2.6667	0.9428	Q9GZL7, Q15785,	1	5.3333	2.8674	2.6666	1.53017	0.265616							heat shock protein binding: 0.003146
157	4	O60664, Q9NY27, P54105, P61586,	19	5.7155	O60664, Q9NY27, P54105, P61586,	1	25	3.7417	6	1.52127	0.267593	RHOA-IP3R-TRPC1_complex	0.0833	3	RHOA-IP3R-TRPC1_complex	0.0833	3	protein phosphatase type 4 regulator activity: 0.0002908	myosin binding: 0.006849	protein binding bridging: 0.01401	protein binding: 0.03228	protein domain specific binding: 0.05461	GTPase activity: 0.0684
197	5	Q9UKF6, Q6UN15, Q9C0J8, Q9P2I0, Q10570,	58	3.7417	Q9UKF6, Q6UN15, Q9C0J8, Q9P2I0, Q10570,	1	61.6667	1.8856	3.6667	1.51574	0.268829	BARD1-BRCA1-CSTF64_complex::BARD1-BRCA1-CSTF_complex::Cleavage_stimulation_factor::Polyadenylation_complex_(CSTF1,_CSTF2,_CSTF3,_SYMPK_CPSF1,_CPSF2,_CPSF3)::Cleavage_and_polyadenylation_factor_(CPSF)	0.2909	11	BARD1-BRCA1-CSTF64_complex::BARD1-BRCA1-CSTF_complex::Cleavage_stimulation_factor::Polyadenylation_complex_(CSTF1,_CSTF2,_CSTF3,_SYMPK_CPSF1,_CPSF2,_CPSF3)::Cleavage_and_polyadenylation_factor_(CPSF)	0.2909	11	RNA binding: 0.001102	endoribonuclease activity: 0.002299	5'-3' exonuclease activity: 0.002782	mRNA 3'-UTR binding: 0.01129	hydrolase activity: 0.06934
472	4	O43678, P28331, Q9Y6M9, Q9UI09,	31.6667	3.2998	O43678, P28331, Q9Y6M9, Q9UI09,	1	34.6667	0.9428	3	1.5141	0.269199	Respiratory_chain_complex_I_(beta_subunit)_mitochondrial::Respiratory_chain_complex_I_(gamma_subunit)_mitochondrial::Respiratory_chain_complex_I_(holoenzyme),_mitochondrial::Respiratory_chain_complex_I_(incomplete_intermediate),_mitochondrial::Respiratory_chain_complex_I_(intermediate_I/200kD_and_III/250kD),_mitochondrial::Respiratory_chain_complex_I_(intermediate_II/230kD),_mitochondrial::Respir…	0.087	46	Respiratory_chain_complex_I_(beta_subunit)_mitochondrial::Respiratory_chain_complex_I_(gamma_subunit)_mitochondrial::Respiratory_chain_complex_I_(holoenzyme),_mitochondrial::Respiratory_chain_complex_I_(incomplete_intermediate),_mitochondrial::Respiratory_chain_complex_I_(intermediate_I/200kD_and_III/250kD),_mitochondrial::Respiratory_chain_complex_I_(intermediate_II/230kD),_mitochondrial::Respir…	0.087	46	NADH dehydrogenase (ubiquinone) activity: 5.529e-11	electron carrier activity: 0.0002362	NADH dehydrogenase activity: 0.001936	2 iron 2 sulfur cluster binding: 0.004831	iron-sulfur cluster binding: 0.006849	4 iron 4 sulfur cluster binding: 0.01325
498	59	P62851, P18621, P50914, Q07020, P05388, P62979, P39019, P46782, P62910, P62424, P46776, P30050, P62913, P62280, Q02543, P62854, P62753, P62750, P25398, P62899, Q12906, Q12905, P26373, P62266, P62241, P36578, P62244, P62263, Q71UM5, P62249, P62917, Q96L21, P63220, P62906, P39023, P83731, P46777, P23396, P61313, P46778, P62829, P35268, P15880, P08708, P61247, P08865, P18124, P84098, P62701, P62847,…	12.6667	3.8586	P62851, P18621, P62854, Q07020, P05388, P62979, P39019, P46782, P62910, P62424, P46776, P30050, P62913, P62280, Q02543, P50914, P62753, P62750, P52272, P25398, P62899, Q12906, Q12905, P26373, P62266, P62241, P36578, P62244, P62263, Q71UM5, P62249, P62917, Q96L21, P63220, P62906, P39023, P83731, P46777, P23396, P61313, P46778, P62829, P35268, P15880, P08708, P61247, P08865, P18124, P84098, P62701,…	0.9833	16.3333	1.6997	3.6666	1.50621	0.27098	40S_ribosomal_subunit,_cytoplasmic::Nop56p-associated_pre-rRNA_complex::TRBP_containing_complex_(DICER,_RPL7A,_EIF6,_MOV10_and_subunits_of_the_60S_ribosomal_particle)::DICER1-NCOA6-AGO2_complex::RNA-induced_silencing_complex,_RISC::TRBP_containing_complex_(DICER,_TRBP,_AGO2,_RPL7A,_EIF6,_MOV10)::FIB-associated_protein_complex	0.3975	129	40S_ribosomal_subunit,_cytoplasmic::Nop56p-associated_pre-rRNA_complex::TRBP_containing_complex_(DICER,_RPL7A,_EIF6,_MOV10_and_subunits_of_the_60S_ribosomal_particle)::DICER1-NCOA6-AGO2_complex::RNA-induced_silencing_complex,_RISC::TRBP_containing_complex_(DICER,_TRBP,_AGO2,_RPL7A,_EIF6,_MOV10)::FIB-associated_protein_complex	0.4052	129	structural constituent of ribosome: 1.011e-104	RNA binding: 1.097e-30	rRNA binding: 6.073e-10	mRNA binding: 2.932e-06	ATP binding: 0.003855	fibroblast growth factor binding: 0.005978	laminin receptor activity: 0.008521	5S rRNA binding: 0.008521	double-stranded RNA binding: 0.008528	mRNA 5'-UTR binding: 0.01551	metal ion binding: 0.02027	translation regulator activity: 0.02377	translation initiation factor binding: 0.04381	protein kinase A binding: 0.05159	translation activator activity: 0.05287	DNA N-glycosylase activity: 0.05543	DNA-(apurinic or apyrimidinic site) lyase activity: 0.063	cysteine-type endopeptidase activator activity involved in apoptotic process: 0.07167	laminin binding: 0.07412	DNA binding: 0.07441	protein binding: 0.07615	iron-sulfur cluster binding: 0.09201
1906	2	Q9BQC6, Q9P015,	2	0.8165	Q9BQC6, Q9P015,	1	1	0.8165	-1	1.49999	0.272395							structural constituent of ribosome: 0.000149
1320	2	Q86XP3, Q9Y314,	24.6667	2.6247	Q86XP3, Q9Y314,	1	22	1.633	-2.6667	1.49418	0.273726	(E.F.G)_complex::12S_U11_snRNP::6S_methyltransferase_and_RG-containing_Sm_proteins_complex::20S_methylosome-SmD_complex::20S_methylosome_and_RG-containing_Sm_protein_complex::6S_methyltransferase_complex::JBP1-pICln_complex::SMN_complex,_U7_snRNA_specific::20S_methyltransferase_complex::AR_coactivator_complex::17S_U2_snRNP::SF3A1-SF3A2-SF3A3_complex::SF3b_complex::Exon_junction_complex::SRm160/30…	0.002	245	(E.F.G)_complex::12S_U11_snRNP::6S_methyltransferase_and_RG-containing_Sm_proteins_complex::20S_methylosome-SmD_complex::20S_methylosome_and_RG-containing_Sm_protein_complex::6S_methyltransferase_complex::JBP1-pICln_complex::SMN_complex,_U7_snRNA_specific::20S_methyltransferase_complex::AR_coactivator_complex::17S_U2_snRNP::SF3A1-SF3A2-SF3A3_complex::SF3b_complex::Exon_junction_complex::SRm160/30…	0.002	245	ATP-dependent helicase activity: 0.01262	RNA binding: 0.09431
1012	2	Q9UGV2, Q14657,	81.6667	2.0548	Q9UGV2, Q14657,	1	76.6667	5.4365	-5	1.4901	0.274665							molecular_function: 0.00108
857	2	P19404, Q5JRX3,	3.3333	0.9428	P19404, Q5JRX3,	1	1.6667	1.6997	-1.6666	1.48515	0.27581	Respiratory_chain_complex_I_(beta_subunit)_mitochondrial::Respiratory_chain_complex_I_(gamma_subunit)_mitochondrial::Respiratory_chain_complex_I_(holoenzyme),_mitochondrial::Respiratory_chain_complex_I_(incomplete_intermediate),_mitochondrial::Respiratory_chain_complex_I_(intermediate_I/200kD_and_III/250kD),_mitochondrial::Respiratory_chain_complex_I_(intermediate_II/230kD),_mitochondrial::Respir…	0.0109	46	Respiratory_chain_complex_I_(beta_subunit)_mitochondrial::Respiratory_chain_complex_I_(gamma_subunit)_mitochondrial::Respiratory_chain_complex_I_(holoenzyme),_mitochondrial::Respiratory_chain_complex_I_(incomplete_intermediate),_mitochondrial::Respiratory_chain_complex_I_(intermediate_I/200kD_and_III/250kD),_mitochondrial::Respiratory_chain_complex_I_(intermediate_II/230kD),_mitochondrial::Respir…	0.0109	46	2 iron 2 sulfur cluster binding: 0.002421	NADH dehydrogenase (ubiquinone) activity: 0.005511	enzyme activator activity: 0.006427	electron carrier activity: 0.01257	metalloendopeptidase activity: 0.013	metal ion binding: 0.01922	oxidoreductase activity: 0.02867	catalytic activity: 0.04231
252	4	Q13144, P49770, Q9UI10, Q9NR50,	171.333	6.1283	Q13144, P49770, Q9UI10, Q9NR50,	1	176.667	1.2472	5.3334	1.47711	0.277683							translation initiation factor activity: 9.916e-10	guanyl-nucleotide exchange factor activity: 4.07e-09	S-methyl-5-thioribose-1-phosphate isomerase activity: 6.412e-07	translation initiation factor binding: 3.492e-06	nucleotidyltransferase activity: 0.008957	translation factor activity nucleic acid binding: 0.01125	protein binding: 0.03228
95	62	P62851, P30050, P62854, P62857, P50914, P05388, P62979, P39019, P18621, Q12906, O00567, P62424, O76021, P61513, P62913, P62280, Q02543, P46777, P62753, P62750, P62241, P52272, P25398, P62899, P46782, P62081, P62266, P55769, P36578, P62244, P62263, Q71UM5, P62249, P62917, P62277, P32969, P62906, P39023, P83731, P22087, P23396, P61313, P46778, P84098, P35268, P15880, P08708, P61247, P08865, P18124,…	25	3.559	P62851, P30050, P62854, P62857, P50914, P05388, P62979, P39019, P18621, Q12906, O00567, P62424, O76021, P61513, P62913, P62280, Q02543, P46777, P62753, P62750, P62241, P52272, P25398, P62899, P46782, P62081, P62266, P55769, P36578, P62244, P62263, Q71UM5, P62249, P62917, P62277, P32969, P62906, P39023, P83731, P22087, P23396, P61313, P46778, P84098, P35268, P15880, P08708, P61247, P08865, P18124,…	1	29.3333	3.6818	4.3333	1.4657	0.280366	40S_ribosomal_subunit,_cytoplasmic::Nop56p-associated_pre-rRNA_complex::TRBP_containing_complex_(DICER,_RPL7A,_EIF6,_MOV10_and_subunits_of_the_60S_ribosomal_particle)::DICER1-NCOA6-AGO2_complex::RNA-induced_silencing_complex,_RISC::TRBP_containing_complex_(DICER,_TRBP,_AGO2,_RPL7A,_EIF6,_MOV10)::FIB-associated_protein_complex	0.4352	129	40S_ribosomal_subunit,_cytoplasmic::Nop56p-associated_pre-rRNA_complex::TRBP_containing_complex_(DICER,_RPL7A,_EIF6,_MOV10_and_subunits_of_the_60S_ribosomal_particle)::DICER1-NCOA6-AGO2_complex::RNA-induced_silencing_complex,_RISC::TRBP_containing_complex_(DICER,_TRBP,_AGO2,_RPL7A,_EIF6,_MOV10)::FIB-associated_protein_complex	0.4352	129	structural constituent of ribosome: 1.85e-101	RNA binding: 5.317e-37	rRNA binding: 8.249e-10	mRNA binding: 3.92e-06	snoRNA binding: 0.000928	fibroblast growth factor binding: 0.006568	laminin receptor activity: 0.008951	5S rRNA binding: 0.008951	metal ion binding: 0.01506	mRNA 5'-UTR binding: 0.01629	translation regulator activity: 0.02495	DNA binding: 0.0294	translation initiation factor binding: 0.04593	protein kinase A binding: 0.05406	translation activator activity: 0.0554	DNA N-glycosylase activity: 0.05807	protein binding: 0.06424	DNA-(apurinic or apyrimidinic site) lyase activity: 0.06598	cysteine-type endopeptidase activator activity involved in apoptotic process: 0.07503	laminin binding: 0.07758	iron-sulfur cluster binding: 0.09619
984	2	Q9Y490, O95881,	12	2.8284	Q9Y490, O95881,	1	9	2.1602	-3	1.46001	0.281717	CAS-SRC-FAK_complex::Polycystin-1_multiprotein_complex_(ACTN1,_CDH1,_SRC,_JUP,_VCL,_CTNNB1,_PXN,_BCAR1,_PKD1,_PTK2,_TLN1)::Polycystin-1-E-cadherin-beta-catenin_complex::Polycystin-1-E-cadherin-beta-catenin-Flotillin-2_complex::PXN-ITGB5-PTK2_complex	0.0385	13	CAS-SRC-FAK_complex::Polycystin-1_multiprotein_complex_(ACTN1,_CDH1,_SRC,_JUP,_VCL,_CTNNB1,_PXN,_BCAR1,_PKD1,_PTK2,_TLN1)::Polycystin-1-E-cadherin-beta-catenin_complex::Polycystin-1-E-cadherin-beta-catenin-Flotillin-2_complex::PXN-ITGB5-PTK2_complex	0.0385	13	protein-disulfide reductase (glutathione) activity: 4.848e-05	LIM domain binding: 0.001502	insulin receptor binding: 0.003871	vinculin binding: 0.004257	structural constituent of cytoskeleton: 0.01573	actin binding: 0.05292
1566	2	Q96QK1, Q4G0F5,	26	5.3541	Q96QK1, Q4G0F5,	1	31.6667	4.1096	5.6667	1.45419	0.283107	Retromer_complex_(SNX1,_SNX2,_VPS35,_VPS29,_VPS26A)::VPS35-VPS29-VPS26A_complex::Retromer_complex_(SNX1,_SNX2,_VPS35,_VPS29,_VPS26B)	0.3333	6	Retromer_complex_(SNX1,_SNX2,_VPS35,_VPS29,_VPS26A)::VPS35-VPS29-VPS26A_complex::Retromer_complex_(SNX1,_SNX2,_VPS35,_VPS29,_VPS26B)	0.3333	6
422	3	Q9H4M9, Q9H223, P52824,	167.333	6.5997	Q9H4M9, Q9H223, P52824,	1	173	1.633	5.6667	1.44365	0.285647							GTPase activity: 0.0009594	ATP binding: 0.001801	GTP binding: 0.002206	phospholipase binding: 0.003338	diacylglycerol kinase activity: 0.004423	NAD+ kinase activity: 0.005073	calcium ion binding: 0.006673	activating transcription factor binding: 0.007021	kinase binding: 0.01104	Rab GTPase binding: 0.01283	protein binding: 0.07615
1135	2	Q96HY6, Q9NX62,	25.6667	4.4969	Q96HY6, Q9NX62,	1	29.6667	1.6997	4	1.44115	0.286253							3'-nucleotidase activity: 0.0001454	3'(2') 5'-bisphosphate nucleotidase activity: 0.0005331	inositol monophosphate 1-phosphatase activity: 0.0008723	inositol monophosphate 3-phosphatase activity: 0.0008723	inositol monophosphate 4-phosphatase activity: 0.0008723
328	4	O95155, Q15631, P15374, A0AVT1,	28.6667	1.6997	O95155, Q15631, P15374, A0AVT1,	1	24	5.3541	-4.6667	1.43891	0.286799							FAT10 activating enzyme activity: 0.0002908	ubiquitin-ubiquitin ligase activity: 0.00242	small protein activating enzyme activity: 0.002613	endonuclease activity: 0.01306	ubiquitin binding: 0.01467	peptidase activity: 0.02305	ubiquitin thiolesterase activity: 0.02418	ligase activity: 0.02623	mRNA binding: 0.0266	cysteine-type peptidase activity: 0.02781	protein binding: 0.03228	enzyme binding: 0.07272
1025	2	Q14004, Q9BTC8,	3	1.633	Q14004, Q9BTC8,	1	5.3333	2.357	2.3333	1.40941	0.294096	ATR-HDAC2-CHD4_complex::Anti-HDAC2_complex::BHC_complex::HDAC1-associated_core_complex_cI::NRD_complex_(Nucleosome_remodeling_and_deacetylation_complex)::XFIM_complex::anti-BHC110_complex::BHC110_complex::CoREST-HDAC_complex::MTA2_complex::Mi2/NuRD_complex::HDAC1-associated_protein_complex::MeCP1_complex::HDAC1-associated_core_complex_cII::HDAC2-asscociated_core_complex::BRAF53-BRCA2_complex::MTA…	0.0081	62	ATR-HDAC2-CHD4_complex::Anti-HDAC2_complex::BHC_complex::HDAC1-associated_core_complex_cI::NRD_complex_(Nucleosome_remodeling_and_deacetylation_complex)::XFIM_complex::anti-BHC110_complex::BHC110_complex::CoREST-HDAC_complex::MTA2_complex::Mi2/NuRD_complex::HDAC1-associated_protein_complex::MeCP1_complex::HDAC1-associated_core_complex_cII::HDAC2-asscociated_core_complex::BRAF53-BRCA2_complex::MTA…	0.0081	62	cyclin binding: 0.002615	RNA polymerase II carboxy-terminal domain kinase activity: 0.002856	cyclin-dependent protein serine/threonine kinase activity: 0.005801	chromatin binding: 0.05062	protein kinase activity: 0.05461	sequence-specific DNA binding: 0.06516
1104	2	O75531, P22087,	43.3333	5.3125	O75531, P22087,	1	48.6667	3.8586	5.3334	1.40692	0.294724	Emerin_complex_25	0.0312	16	Emerin_complex_25	0.0312	16	methyltransferase activity: 0.01515	RNA binding: 0.09431
56	41	P30050, P05386, P62854, P05388, P08865, P46782, O00567, Q9BVJ6, P62424, P61513, P62913, P52272, Q02543, P22087, P62753, P62750, P62899, P62277, P62081, P62266, P62241, Q9Y2X3, P36578, P62244, P62263, P62249, P46777, P23396, P55769, P61313, P84098, P15880, P46087, P61247, Q00839, P18124, P62829, P62701, P62888, Q07020, Q02878,	13	2.9439	P30050, P05386, P62854, P05388, P08865, P46782, O00567, Q9BVJ6, P62424, P61513, P62913, P52272, Q02543, P22087, P62753, P62750, P62899, P62277, P62081, P62266, P62241, Q9Y2X3, P36578, P62244, P62263, P62249, P46777, P23396, P55769, P61313, P84098, P15880, P46087, P61247, Q00839, P18124, P62829, P62701, P62888, Q07020, Q02878,	1	9.6667	2.8674	-3.3333	1.40488	0.295238	40S_ribosomal_subunit,_cytoplasmic::Nop56p-associated_pre-rRNA_complex::TRBP_containing_complex_(DICER,_RPL7A,_EIF6,_MOV10_and_subunits_of_the_60S_ribosomal_particle)::DICER1-NCOA6-AGO2_complex::RNA-induced_silencing_complex,_RISC::TRBP_containing_complex_(DICER,_TRBP,_AGO2,_RPL7A,_EIF6,_MOV10)::FIB-associated_protein_complex	0.2876	129	40S_ribosomal_subunit,_cytoplasmic::Nop56p-associated_pre-rRNA_complex::TRBP_containing_complex_(DICER,_RPL7A,_EIF6,_MOV10_and_subunits_of_the_60S_ribosomal_particle)::DICER1-NCOA6-AGO2_complex::RNA-induced_silencing_complex,_RISC::TRBP_containing_complex_(DICER,_TRBP,_AGO2,_RPL7A,_EIF6,_MOV10)::FIB-associated_protein_complex	0.2876	129	structural constituent of ribosome: 2.24e-56	RNA binding: 1.099e-30	mRNA binding: 3.299e-07	snoRNA binding: 3.608e-06	rRNA binding: 4.114e-05	protein binding: 0.0004934	laminin receptor activity: 0.005934	5S rRNA binding: 0.005934	mRNA 5'-UTR binding: 0.01083	metal ion binding: 0.01449	translation regulator activity: 0.01663	S-adenosylmethionine-dependent methyltransferase activity: 0.02142	ATP binding: 0.02776	methyltransferase activity: 0.0354	protein kinase A binding: 0.03643	DNA N-glycosylase activity: 0.0392	DNA-(apurinic or apyrimidinic site) lyase activity: 0.04467	laminin binding: 0.05276	iron-sulfur cluster binding: 0.06592	NF-kappaB binding: 0.07193	fibroblast growth factor binding: 0.07533	ribosome binding: 0.07953
1653	64	P62851, P30050, P62854, P62857, P50914, Q07020, P05388, P62979, P39019, P18621, Q12906, O00567, P62424, P61513, P62913, P62280, Q02543, P22087, P62753, Q8IY81, P62241, P52272, P25398, P62899, P46782, P62081, P62266, P55769, Q9Y2X3, P36578, P62244, P62263, Q71UM5, P62249, P62917, Q96L21, P26373, P32969, P62906, P39023, P83731, P46777, P23396, P61313, P46778, P84098, P35268, P15880, P08708, P61247,…	19.3333	3.2998	P62851, P30050, P62854, P62857, P50914, Q07020, P05388, P62979, P39019, P18621, Q12906, O00567, P62424, P61513, P62913, P62280, Q02543, P22087, P62753, Q8IY81, P62241, P52272, P25398, P62899, P46782, P62081, P62266, P55769, Q9Y2X3, P36578, P62244, P62263, Q71UM5, P62249, P62917, Q96L21, P26373, P32969, P62906, P39023, P83731, P46777, P23396, P61313, P46778, P84098, P35268, P15880, P08708, P61247,…	1	23.3333	3.6818	4	1.4013	0.296143	40S_ribosomal_subunit,_cytoplasmic::Nop56p-associated_pre-rRNA_complex::TRBP_containing_complex_(DICER,_RPL7A,_EIF6,_MOV10_and_subunits_of_the_60S_ribosomal_particle)::DICER1-NCOA6-AGO2_complex::RNA-induced_silencing_complex,_RISC::TRBP_containing_complex_(DICER,_TRBP,_AGO2,_RPL7A,_EIF6,_MOV10)::FIB-associated_protein_complex	0.436	129	40S_ribosomal_subunit,_cytoplasmic::Nop56p-associated_pre-rRNA_complex::TRBP_containing_complex_(DICER,_RPL7A,_EIF6,_MOV10_and_subunits_of_the_60S_ribosomal_particle)::DICER1-NCOA6-AGO2_complex::RNA-induced_silencing_complex,_RISC::TRBP_containing_complex_(DICER,_TRBP,_AGO2,_RPL7A,_EIF6,_MOV10)::FIB-associated_protein_complex	0.436	129	structural constituent of ribosome: 1.303e-99	RNA binding: 1.097e-34	rRNA binding: 1.003e-09	mRNA binding: 4.718e-06	snoRNA binding: 1.389e-05	fibroblast growth factor binding: 0.006975	laminin receptor activity: 0.009237	5S rRNA binding: 0.009237	metal ion binding: 0.01231	mRNA 5'-UTR binding: 0.01681	DNA binding: 0.02485	translation regulator activity: 0.02574	protein binding: 0.03343	translation initiation factor binding: 0.04734	protein kinase A binding: 0.05571	translation activator activity: 0.05709	DNA N-glycosylase activity: 0.05983	DNA-(apurinic or apyrimidinic site) lyase activity: 0.06796	methyltransferase activity: 0.07304	cysteine-type endopeptidase activator activity involved in apoptotic process: 0.07725	laminin binding: 0.07987	iron-sulfur cluster binding: 0.09896
200	4	P45974, Q06830, P32119, P62256,	96.3333	3.2998	P45974, Q06830, P32119, P62256,	1	99	0	2.6667	1.39974	0.29654							thioredoxin peroxidase activity: 1.48e-07	antioxidant activity: 0.004253	peroxidase activity: 0.004542	omega peptidase activity: 0.005793	acid-amino acid ligase activity: 0.01144	cysteine-type endopeptidase activity: 0.01968	ubiquitin thiolesterase activity: 0.02418	heme binding: 0.034	oxidoreductase activity: 0.05568	ubiquitin-protein ligase activity: 0.06753
956	2	Q8WVB6, P35250,	27.6667	2.4944	Q8WVB6, P35250,	1	24.3333	3.2998	-3.3334	1.39577	0.297549	CHL12-RFC2-5_complex::CTF18-RFC_subcomplex::CTF18-cohesion-RFC-POLH_complex::CTF18-CTF8-DCC1-RFC3_complex::CTF18-CTF8-DCC1_complex::CTF18-cohesion-RFC_complex::CTF8-CTF18-DCC1_subcomplex::PCNA-CHL12-RFC2-5_complex::PCNA-RFC2-5_complex	0.2222	9	CHL12-RFC2-5_complex::CTF18-RFC_subcomplex::CTF18-cohesion-RFC-POLH_complex::CTF18-CTF8-DCC1-RFC3_complex::CTF18-CTF8-DCC1_complex::CTF18-cohesion-RFC_complex::CTF8-CTF18-DCC1_subcomplex::PCNA-CHL12-RFC2-5_complex::PCNA-RFC2-5_complex	0.2222	9	nucleoside-triphosphatase activity: 1.458e-05	ATP binding: 0.0148	DNA binding: 0.01533
263	6	Q96JB2, Q9H9E3, Q8WTW3, P83436, Q14746, Q9UP83,	32	5.099	Q96JB2, Q9H9E3, Q8WTW3, P83436, Q14746, Q9UP83,	1	27.3333	2.8674	-4.6667	1.38172	0.301159	COG1-COG8-COG2-COG3-COG4_subcomplex::COG2-COG3-COG4_subcomplex::COG_complex::COG1-COG8-COG5-COG6-COG7_subcomplex::COG5-COG6-COG7_subcomplex::Conserved_oligomeric_Golgi_(COG)_complex::Ternary_COG_subcomplex::Tetrameric_COG_subcomplex	0.75	8	COG1-COG8-COG2-COG3-COG4_subcomplex::COG2-COG3-COG4_subcomplex::COG_complex::COG1-COG8-COG5-COG6-COG7_subcomplex::COG5-COG6-COG7_subcomplex::Conserved_oligomeric_Golgi_(COG)_complex::Ternary_COG_subcomplex::Tetrameric_COG_subcomplex	0.75	8	protein transporter activity: 0.0005104	protein binding: 0.005797
1244	2	O94979, P11142,	3.6667	1.6997	O94979, P11142,	1	5.3333	1.2472	1.6666	1.36924	0.304408	DNAJB2-HSPA8-PSMA3_complex	0.1667	3	DNAJB2-HSPA8-PSMA3_complex	0.1667	3	ATPase activity coupled: 0.002324	calcium-dependent protein binding: 0.00662	unfolded protein binding: 0.01578
936	2	P43487, P62826,	92	3.7417	P43487, P62826,	1	96.3333	4.0277	4.3333	1.36525	0.305457	RANBP1-RAN-KPNB1_complex	0.6667	3	RANBP1-RAN-KPNB1_complex	0.6667	3	GDP-dissociation inhibitor activity: 0.001211	Ran GTPase binding: 0.005029	androgen receptor binding: 0.007919	GTPase activator activity: 0.02163	transcription coactivator activity: 0.03209	GTPase activity: 0.03547	chromatin binding: 0.05062	GTP binding: 0.05351
1252	2	Q96B97, Q12884,	9.6667	2.4944	Q96B97, Q12884,	1	11.6667	0.4714	2	1.3646	0.305629	RICH1/AMOT_polarity_complex,_Flag-Rich1_precipitated	0.0556	9	RICH1/AMOT_polarity_complex,_Flag-Rich1_precipitated	0.0556	9	dipeptidyl-peptidase activity: 0.002324	endopeptidase activity: 0.006812	serine-type peptidase activity: 0.00816	protease binding: 0.01037	peptidase activity: 0.01166	metalloendopeptidase activity: 0.013	SH3 domain binding: 0.01806	serine-type endopeptidase activity: 0.02006	protein dimerization activity: 0.0211	kinase activity: 0.02186	protein homodimerization activity: 0.08226
1696	3	Q9BQE3, Q9BUF5, P68363,	977.333	6.0185	Q9BQE3, Q9BUF5, P68363,	1	965.667	13.5728	-11.6666	1.361	0.30658	60S_APC_containing_complex	0.1905	7	60S_APC_containing_complex	0.1905	7	structural constituent of cytoskeleton: 4.935e-07	GTPase activity: 5.866e-06	GTP binding: 2.077e-05	structural molecule activity: 0.0006243	protein domain specific binding: 0.04155
1120	2	Q8WVV9, O75175,	32	3.266	Q8WVV9, O75175,	1	29.3333	0.9428	-2.6667	1.35875	0.307176							mRNA binding: 0.01348	nucleotide binding: 0.05475	RNA binding: 0.09431
181	5	Q04637, P78344, P23588, P60842, O43432,	6	1.4142	Q04637, P78344, P23588, P60842, O43432,	1	4.6667	0.9428	-1.3333	1.35871	0.307185	MNK1-eIF4F_complex	0.36	5	MNK1-eIF4F_complex	0.36	5	translation initiation factor activity: 5.505e-12	translation factor activity nucleic acid binding: 3.063e-10	RNA cap binding: 1.108e-05	RNA binding: 2.873e-05	helicase activity: 0.0261	ATP-dependent helicase activity: 0.03096	mRNA binding: 0.03303	nucleic acid binding: 0.04542	protein binding: 0.09298
1526	2	Q13405, P19022,	5	1.4142	Q13405, P19022,	1	3.6667	0.9428	-1.3333	1.35871	0.307185							alpha-catenin binding: 0.001695	gamma-catenin binding: 0.003823	protein phosphatase binding: 0.008881	beta-catenin binding: 0.01219	structural constituent of ribosome: 0.02414	phospholipid binding: 0.05044	calcium ion binding: 0.09204
1428	2	Q9Y639, Q3ZAQ7,	60.6667	4.7842	Q9Y639, Q3ZAQ7,	1	65	2.8284	4.3333	1.35046	0.309383							type 1 fibroblast growth factor receptor binding: 0.0002424	cell adhesion molecule binding: 0.004595
1543	2	Q96AT9, Q9BV20,	39	2.4495	Q96AT9, Q9BV20,	1	34.6667	4.9889	-4.3333	1.35044	0.309387							ribulose-phosphate 3-epimerase activity: 0.00063	S-methyl-5-thioribose-1-phosphate isomerase activity: 0.0006785	racemase and epimerase activity acting on carbohydrates and derivatives: 0.0007754	identical protein binding: 0.00129	monosaccharide binding: 0.001599	protein homodimerization activity: 0.08226
901	2	P55735, P55011,	23.3333	4.4969	P55735, P55011,	1	27.6667	3.2998	4.3334	1.34566	0.310671	NPC_subcomplex_(NUP98,_NUP107,_NUP133,_NUP160)::Nup_107-160_subcomplex	0.0556	9	NPC_subcomplex_(NUP98,_NUP107,_NUP133,_NUP160)::Nup_107-160_subcomplex	0.0556	9	sodium:potassium:chloride symporter activity: 0.0003878	ammonia transmembrane transporter activity: 0.0006785	cation:chloride symporter activity: 0.0006785
904	2	P12814, Q96CS3,	28.3333	2.8674	P12814, Q96CS3,	1	30.6667	0.9428	2.3334	1.33897	0.312475	CAS-SRC-FAK_complex::Polycystin-1_multiprotein_complex_(ACTN1,_CDH1,_SRC,_JUP,_VCL,_CTNNB1,_PXN,_BCAR1,_PKD1,_PTK2,_TLN1)::Polycystin-1-E-cadherin-beta-catenin_complex::Polycystin-1-E-cadherin-beta-catenin-Flotillin-2_complex::PXN-ITGB5-PTK2_complex	0.0385	13	CAS-SRC-FAK_complex::Polycystin-1_multiprotein_complex_(ACTN1,_CDH1,_SRC,_JUP,_VCL,_CTNNB1,_PXN,_BCAR1,_PKD1,_PTK2,_TLN1)::Polycystin-1-E-cadherin-beta-catenin_complex::Polycystin-1-E-cadherin-beta-catenin-Flotillin-2_complex::PXN-ITGB5-PTK2_complex	0.0385	13	vinculin binding: 0.004257	ubiquitin binding: 0.00739	ion channel binding: 0.01157	integrin binding: 0.01329	actin filament binding: 0.01611	ubiquitin protein ligase binding: 0.0256	protein domain specific binding: 0.0281	actin binding: 0.05292	calcium ion binding: 0.09204
1087	2	Q12846, Q9UBX3,	10.3333	3.6818	Q12846, Q9UBX3,	1	7.3333	1.2472	-3	1.3367	0.313091	SNARE_complex_(STX11,_VAMP2,_SNAP23)::SNARE_complex_(STX4,_SNAP23,_VAMP2)::SNARE_complex_(STX4,_SNAP23,_VAMP1)::SNARE_complex_(STX4,_VAMP1,_VAMP7)::SNARE_complex_(STX4,_VAMP8,_VAMP3,_SNAP23)	0.0625	8	SNARE_complex_(STX11,_VAMP2,_SNAP23)::SNARE_complex_(STX4,_SNAP23,_VAMP2)::SNARE_complex_(STX4,_SNAP23,_VAMP1)::SNARE_complex_(STX4,_VAMP1,_VAMP7)::SNARE_complex_(STX4,_VAMP8,_VAMP3,_SNAP23)	0.0625	8	dicarboxylic acid transmembrane transporter activity: 0.0001939	thiosulfate transmembrane transporter activity: 0.0001939	malate transmembrane transporter activity: 0.0001939	phosphate ion transmembrane transporter activity: 0.0003393	succinate transmembrane transporter activity: 0.00063	SNARE binding: 0.001211	sulfate transmembrane transporter activity: 0.001889	antiporter activity: 0.002276	SNAP receptor activity: 0.003388	structural constituent of ribosome: 0.02414
1432	2	P52888, P52735,	4.6667	1.2472	P52888, P52735,	1	3.3333	1.2472	-1.3334	1.30939	0.32061							epidermal growth factor receptor binding: 0.002615	peptide binding: 0.004933	Rho guanyl-nucleotide exchange factor activity: 0.01281	metalloendopeptidase activity: 0.013	guanyl-nucleotide exchange factor activity: 0.01592	metal ion binding: 0.01922	phospholipid binding: 0.05044
435	3	Q92600, O75175, A5YKK6,	67.6667	4.4969	Q92600, O75175, A5YKK6,	1	72	3.559	4.3333	1.30875	0.320789							poly(A)-specific ribonuclease activity: 0.00341	retinoic acid receptor binding: 0.003917	estrogen receptor binding: 0.005867	protein binding: 0.07615
945	2	P13798, Q4J6C6,	59	4.0825	P13798, Q4J6C6,	1	62.6667	2.6247	3.6667	1.30854	0.320849							serine-type endopeptidase activity: 0.0001024	serine-type exopeptidase activity: 0.0005331
1605	2	P19447, Q8N196,	8.3333	0.4714	P19447, Q8N196,	1	10	2.1602	1.6667	1.30564	0.321661	BP-SMAD_complex	0.0625	8	BP-SMAD_complex	0.0625	8	3'-5' DNA helicase activity: 0.0001454	dATP binding: 0.0004847	RNA polymerase II carboxy-terminal domain kinase activity: 0.002856	peptide binding: 0.004933	ATP-dependent DNA helicase activity: 0.005077	DNA-dependent ATPase activity: 0.008063	damaged DNA binding: 0.01209	protein N-terminus binding: 0.01506	ATPase activity: 0.02096	protein C-terminus binding: 0.02857	transcription factor binding: 0.03817	GTP binding: 0.05351	protein kinase activity: 0.05461	sequence-specific DNA binding: 0.06516
678	2	Q13636, P62820,	9.6667	0.4714	Q13636, P62820,	1	8	2.1602	-1.6667	1.30564	0.321661							GTPase activity: 0.0003257	GTP binding: 0.0007563	GDP binding: 0.006812
731	2	O00165, Q01844,	3	1.4142	O00165, Q01844,	1	4.6667	1.6997	1.6667	1.3056	0.321671	(E.F.G)_complex::12S_U11_snRNP::6S_methyltransferase_and_RG-containing_Sm_proteins_complex::20S_methylosome-SmD_complex::20S_methylosome_and_RG-containing_Sm_protein_complex::6S_methyltransferase_complex::JBP1-pICln_complex::SMN_complex,_U7_snRNA_specific::20S_methyltransferase_complex::AR_coactivator_complex::17S_U2_snRNP::SF3A1-SF3A2-SF3A3_complex::SF3b_complex::Exon_junction_complex::SRm160/30…	0.002	245	(E.F.G)_complex::12S_U11_snRNP::6S_methyltransferase_and_RG-containing_Sm_proteins_complex::20S_methylosome-SmD_complex::20S_methylosome_and_RG-containing_Sm_protein_complex::6S_methyltransferase_complex::JBP1-pICln_complex::SMN_complex,_U7_snRNA_specific::20S_methyltransferase_complex::AR_coactivator_complex::17S_U2_snRNP::SF3A1-SF3A2-SF3A3_complex::SF3b_complex::Exon_junction_complex::SRm160/30…	0.002	245	interleukin-1 binding: 0.0004362	protein N-terminus binding: 0.01506	calmodulin binding: 0.02499	nucleotide binding: 0.05475	identical protein binding: 0.06927	RNA binding: 0.09431
443	3	Q9Y5M8, Q15637, Q7Z7H5,	3.3333	1.2472	Q9Y5M8, Q15637, Q7Z7H5,	1	4.3333	0.4714	1	1.29906	0.323513	(E.F.G)_complex::12S_U11_snRNP::6S_methyltransferase_and_RG-containing_Sm_proteins_complex::20S_methylosome-SmD_complex::20S_methylosome_and_RG-containing_Sm_protein_complex::6S_methyltransferase_complex::JBP1-pICln_complex::SMN_complex,_U7_snRNA_specific::20S_methyltransferase_complex::AR_coactivator_complex::17S_U2_snRNP::SF3A1-SF3A2-SF3A3_complex::SF3b_complex::Exon_junction_complex::SRm160/30…	0.0014	245	(E.F.G)_complex::12S_U11_snRNP::6S_methyltransferase_and_RG-containing_Sm_proteins_complex::20S_methylosome-SmD_complex::20S_methylosome_and_RG-containing_Sm_protein_complex::6S_methyltransferase_complex::JBP1-pICln_complex::SMN_complex,_U7_snRNA_specific::20S_methyltransferase_complex::AR_coactivator_complex::17S_U2_snRNP::SF3A1-SF3A2-SF3A3_complex::SF3b_complex::Exon_junction_complex::SRm160/30…	0.0014	245	transcription corepressor activity: 0.0399	signal transducer activity: 0.05379	GTP binding: 0.07806
962	2	P52655, Q96EB6,	2.3333	0.4714	P52655, Q96EB6,	1	1.3333	1.2472	-1	1.29906	0.323513	FOXO1-FHL2-SIRT1_complex	0.1667	3	FOXO1-FHL2-SIRT1_complex	0.1667	3	HLH domain binding: 0.0004847	NAD-dependent protein deacetylase activity: 0.00063	NAD-dependent histone deacetylase activity: 0.0008238	deacetylase activity: 0.001018	mitogen-activated protein kinase binding: 0.001792	NAD+ binding: 0.002276	protein deacetylase activity: 0.002469	TBP-class protein binding: 0.002566	bHLH transcription factor binding: 0.003098	NAD+ ADP-ribosyltransferase activity: 0.004305	histone deacetylase activity: 0.004402	NAD-dependent histone deacetylase activity (H3-K9 specific): 0.004402	p53 binding: 0.008688	histone binding: 0.009121	transcription corepressor activity: 0.02697	protein domain specific binding: 0.0281	protein C-terminus binding: 0.02857	transcription coactivator activity: 0.03209	enzyme binding: 0.0378	transcription factor binding: 0.03817	protein heterodimerization activity: 0.04915	identical protein binding: 0.06927
1451	2	O60506, P35232,	2.3333	1.2472	O60506, P35232,	1	1.3333	0.4714	-1	1.29906	0.323513	GAIT_complex	0.125	4	GAIT_complex	0.125	4	poly(A) RNA binding: 0.002469	sequence-specific DNA binding RNA polymerase II transcription factor activity: 0.009313	histone deacetylase binding: 0.009937	transcription regulatory region DNA binding: 0.02683	nucleotide binding: 0.05475	RNA binding: 0.09431
420	7	Q9GZT3, Q9BQ15, O14828, P30405, Q9Y5M8, P29558, Q8IWZ8,	0.6667	0.4714	Q9BQ15, O14828, P30405, P29558, Q9Y5M8, Q8IWZ8,	0.8571	1.6667	1.2472	1	1.29906	0.323513	SCAMP1-SCAMP2-SCAMP3_complex	0.0476	3	SCAMP1-SCAMP2-SCAMP3_complex	0.0556	3	single-stranded DNA binding: 0.0005894	RNA binding: 0.003484	cyclosporin A binding: 0.004227	nucleic acid binding: 0.01114	nucleotide binding: 0.01443	peptidyl-prolyl cis-trans isomerase activity: 0.02132	double-stranded DNA binding: 0.05121
44	12	P31943, P61978, O60506, Q07955, Q13151, O14979, P52597, O43390, P26368, P09651, P14866, P52272,	1.3333	1.2472	P31943, P61978, O60506, Q07955, Q13151, O14979, P52597, O43390, P26368, P09651, P14866, P52272,	1	0.3333	0.4714	-1	1.29906	0.323513	(E.F.G)_complex::12S_U11_snRNP::6S_methyltransferase_and_RG-containing_Sm_proteins_complex::20S_methylosome-SmD_complex::20S_methylosome_and_RG-containing_Sm_protein_complex::6S_methyltransferase_complex::JBP1-pICln_complex::SMN_complex,_U7_snRNA_specific::20S_methyltransferase_complex::AR_coactivator_complex::17S_U2_snRNP::SF3A1-SF3A2-SF3A3_complex::SF3b_complex::Exon_junction_complex::SRm160/30…	0.034	245	(E.F.G)_complex::12S_U11_snRNP::6S_methyltransferase_and_RG-containing_Sm_proteins_complex::20S_methylosome-SmD_complex::20S_methylosome_and_RG-containing_Sm_protein_complex::6S_methyltransferase_complex::JBP1-pICln_complex::SMN_complex,_U7_snRNA_specific::20S_methyltransferase_complex::AR_coactivator_complex::17S_U2_snRNP::SF3A1-SF3A2-SF3A3_complex::SF3b_complex::Exon_junction_complex::SRm160/30…	0.034	245	nucleotide binding: 9.86e-17	RNA binding: 2.16e-16	single-stranded DNA binding: 3.224e-05	poly(A) RNA binding: 9.772e-05	single-stranded RNA binding: 0.0003041	nucleic acid binding: 0.001144	poly(G) RNA binding: 0.001743	protein binding: 0.004098	RS domain binding: 0.006363	AU-rich element binding: 0.01094	C2H2 zinc finger domain binding: 0.01151	poly(U) RNA binding: 0.0135	RNA polymerase II core promoter proximal region sequence-specific DNA binding: 0.0368	RNA polymerase II core promoter proximal region sequence-specific DNA binding transcription factor activity involved in positive regulation of transcription: 0.06651	double-stranded DNA binding: 0.08448
873	2	Q00325, Q99805,	1.3333	1.2472	Q00325, Q99805,	1	0.3333	0.4714	-1	1.29906	0.323513							phosphate ion carrier activity: 0.0003393	symporter activity: 0.006379
1513	2	Q96A26, P53007,	1.6667	1.2472	Q96A26, P53007,	1	2.6667	0.4714	1	1.29906	0.323513							citrate transmembrane transporter activity: 0.0007754
1804	2	Q9Y4E1, Q9Y3C0,	0.3333	0.4714	Q9Y4E1, Q9Y3C0,	1	1.3333	1.2472	1	1.29906	0.323513
205	3	Q96AE4, Q15365, P14618,	5.6667	2.0548	Q96AE4, Q15365, P14618,	1	7.6667	1.6997	2	1.29903	0.32352							single-stranded DNA binding: 8.602e-05	pyruvate kinase activity: 0.0007995	potassium ion binding: 0.002033	RNA binding: 0.007017	magnesium ion binding: 0.0447	protein binding: 0.07615
1536	2	Q96G03, P36871,	202.333	7.4087	Q96G03, P36871,	1	209	4.9666	6.6667	1.2946	0.324775							phosphoglucomutase activity: 2.009e-07	magnesium ion binding: 0.0002358	phosphopentomutase activity: 0.0002908	intramolecular transferase activity phosphotransferases: 0.0003878
121	63	P62851, P30050, P62854, P62857, P50914, P05388, P08865, P39019, P18621, P46782, P39023, P62424, P61513, P62913, P62280, Q02543, P62847, P62753, Q8IY81, P62241, P52272, P25398, P62899, P62277, P62081, P62266, P61313, Q9Y2X3, P36578, P62244, P62263, Q71UM5, P62249, P62917, Q96L21, P32969, P62906, P62979, P83731, P46777, P23396, P55769, P46778, P08708, P84098, P35268, P15880, P46087, P61247, Q12906,…	18	4.899	P62851, P30050, P62854, P62857, P50914, P05388, P08865, P39019, P18621, P46782, P39023, P62424, P61513, P62913, P62280, Q02543, P62847, P62753, Q8IY81, P62241, P52272, P25398, P62899, P62277, P62081, P62266, P61313, Q9Y2X3, P36578, P62244, P62263, Q71UM5, P62249, P62917, Q96L21, P32969, P62906, P62979, P83731, P46777, P23396, P55769, P46778, P08708, P62829, P35268, P15880, P46087, P61247, Q12906,…	1	22	2.1602	4	1.29399	0.324947	40S_ribosomal_subunit,_cytoplasmic::Nop56p-associated_pre-rRNA_complex::TRBP_containing_complex_(DICER,_RPL7A,_EIF6,_MOV10_and_subunits_of_the_60S_ribosomal_particle)::DICER1-NCOA6-AGO2_complex::RNA-induced_silencing_complex,_RISC::TRBP_containing_complex_(DICER,_TRBP,_AGO2,_RPL7A,_EIF6,_MOV10)::FIB-associated_protein_complex	0.4139	129	40S_ribosomal_subunit,_cytoplasmic::Nop56p-associated_pre-rRNA_complex::TRBP_containing_complex_(DICER,_RPL7A,_EIF6,_MOV10_and_subunits_of_the_60S_ribosomal_particle)::DICER1-NCOA6-AGO2_complex::RNA-induced_silencing_complex,_RISC::TRBP_containing_complex_(DICER,_TRBP,_AGO2,_RPL7A,_EIF6,_MOV10)::FIB-associated_protein_complex	0.4139	129	structural constituent of ribosome: 1.647e-100	RNA binding: 4.506e-35	rRNA binding: 9.104e-10	mRNA binding: 4.304e-06	snoRNA binding: 0.0009578	ATP binding: 0.002448	fibroblast growth factor binding: 0.00677	laminin receptor activity: 0.009094	5S rRNA binding: 0.009094	metal ion binding: 0.01362	mRNA 5'-UTR binding: 0.01655	translation regulator activity: 0.02534	S-adenosylmethionine-dependent methyltransferase activity: 0.03255	protein binding: 0.04068	translation initiation factor binding: 0.04664	protein kinase A binding: 0.05489	translation activator activity: 0.05625	DNA binding: 0.05738	DNA N-glycosylase activity: 0.05895	DNA-(apurinic or apyrimidinic site) lyase activity: 0.06697	methyltransferase activity: 0.0713	cysteine-type endopeptidase activator activity involved in apoptotic process: 0.07614	laminin binding: 0.07872	iron-sulfur cluster binding: 0.09758
1217	2	Q99598, Q15631,	51.3333	4.6428	Q99598, Q15631,	1	56.6667	5.4365	5.3334	1.29213	0.325476							sequence-specific DNA binding: 0.001136	endonuclease activity: 0.006572	protein transporter activity: 0.01176	mRNA binding: 0.01348	DNA binding: 0.01533
107	4	P30041, Q06830, P32119, P30044,	39.6667	3.8586	P30041, Q06830, P32119, P30044,	1	35	4.9666	-4.6667	1.28518	0.327461							antioxidant activity: 4.523e-09	thioredoxin peroxidase activity: 1.48e-07	peroxiredoxin activity: 2.537e-07	peroxidase activity: 7.605e-06	RNA polymerase III regulatory region DNA binding: 9.696e-05	peroxynitrite reductase activity: 9.696e-05	phospholipase A2 activity: 0.003867	glutathione peroxidase activity: 0.004734	cysteine-type endopeptidase inhibitor activity involved in apoptotic process: 0.004927	heme binding: 0.034	protein dimerization activity: 0.04131	oxidoreductase activity: 0.05568	receptor binding: 0.07495
1168	2	P55786, Q9Y3F4,	257.333	5.3125	P55786, Q9Y3F4,	1	253	2.4495	-4.3333	1.28299	0.328091	Anti-SMN_protein_complex::Anti-Sm_protein_complex::SMN1-SIP1-SNRP_complex::SMN_complex::SMN_complex_(GEMIN2,5,_SMN)::SMN_complex_(GEMIN5,2,3,4,_SMN)::SMN_complex_(GEMIN5,4,3),_SMN-independent_intermediate::SMN_complex_(GEMIN6,7,_UNRIP),_SMN-independent_intermediate::SMN_containing_complex::PPP4C-PPP4R2-Gemin3-Gemin4_complex::SMN-PolII-RHA_complex	0.0172	29	Anti-SMN_protein_complex::Anti-Sm_protein_complex::SMN1-SIP1-SNRP_complex::SMN_complex::SMN_complex_(GEMIN2,5,_SMN)::SMN_complex_(GEMIN5,2,3,4,_SMN)::SMN_complex_(GEMIN5,4,3),_SMN-independent_intermediate::SMN_complex_(GEMIN6,7,_UNRIP),_SMN-independent_intermediate::SMN_containing_complex::PPP4C-PPP4R2-Gemin3-Gemin4_complex::SMN-PolII-RHA_complex	0.0172	29	aminopeptidase activity: 0.00686	metallopeptidase activity: 0.01046	kinase activity: 0.02186	receptor binding: 0.03901
1307	2	P51659, P04040,	8	2.1602	P51659, P04040,	1	6	1.633	-2	1.27922	0.329175							catalase activity: 4.848e-05	oxidoreductase activity acting on peroxide as acceptor: 4.848e-05	17-beta-hydroxysteroid dehydrogenase (NAD+) activity: 0.0002908	3alpha 7alpha 12alpha-trihydroxy-5beta-cholest-24-enoyl-CoA hydratase activity: 0.0002908	receptor binding: 0.0003956	long-chain-enoyl-CoA hydratase activity: 0.0007754	aminoacylase activity: 0.0008238	sterol binding: 0.001066	3-hydroxyacyl-CoA dehydrogenase activity: 0.001163	protein homodimerization activity: 0.001846	antioxidant activity: 0.002131	isomerase activity: 0.003436	NADP binding: 0.006957	heme binding: 0.0173	oxidoreductase activity: 0.02867	enzyme binding: 0.0378
1351	2	P53350, O14777,	5.3333	2.0548	P53350, O14777,	1	3.6667	0.9428	-1.6666	1.27684	0.329863	NDC80_kinetochore_complex	0.125	4	NDC80_kinetochore_complex	0.125	4	anaphase-promoting complex binding: 0.0002908	kinase activity: 0.02186	microtubule binding: 0.02536	protein kinase binding: 0.04735	protein kinase activity: 0.05461	protein serine/threonine kinase activity: 0.06063
1309	2	O43396, Q53H82,	90.6667	9.9778	O43396, Q53H82,	1	83	2.9439	-7.6667	1.27647	0.329971							disulfide oxidoreductase activity: 0.0005331	protein disulfide oxidoreductase activity: 0.004498	hydrolase activity: 0.02899
1481	2	Q14161, P00966,	16	1.4142	Q14161, P00966,	1	18.3333	2.8674	2.3333	1.26405	0.333585							argininosuccinate synthase activity: 0.0001939	ARF GTPase activator activity: 0.005511
1166	2	Q13045, Q8WYQ5,	7.6667	2.8674	Q13045, Q8WYQ5,	1	10	1.4142	2.3333	1.26405	0.333585	(E.F.G)_complex::12S_U11_snRNP::6S_methyltransferase_and_RG-containing_Sm_proteins_complex::20S_methylosome-SmD_complex::20S_methylosome_and_RG-containing_Sm_protein_complex::6S_methyltransferase_complex::JBP1-pICln_complex::SMN_complex,_U7_snRNA_specific::20S_methyltransferase_complex::AR_coactivator_complex::17S_U2_snRNP::SF3A1-SF3A2-SF3A3_complex::SF3b_complex::Exon_junction_complex::SRm160/30…	0.002	245	(E.F.G)_complex::12S_U11_snRNP::6S_methyltransferase_and_RG-containing_Sm_proteins_complex::20S_methylosome-SmD_complex::20S_methylosome_and_RG-containing_Sm_protein_complex::6S_methyltransferase_complex::JBP1-pICln_complex::SMN_complex,_U7_snRNA_specific::20S_methyltransferase_complex::AR_coactivator_complex::17S_U2_snRNP::SF3A1-SF3A2-SF3A3_complex::SF3b_complex::Exon_junction_complex::SRm160/30…	0.002	245	double-stranded RNA binding: 0.004788	actin binding: 0.05292
1269	2	Q9Y2L1, A1X283,	16.6667	3.0912	Q9Y2L1, A1X283,	1	13.3333	3.3993	-3.3334	1.2566	0.335778	Exosome	0.0455	11	Exosome	0.0455	11	phosphatidylinositol-5-phosphate binding: 0.0004362	phosphatidylinositol-4-phosphate binding: 0.0009207	phosphatidylinositol-3 5-bisphosphate binding: 0.001066	phosphatidylinositol-3-phosphate binding: 0.001647	3'-5'-exoribonuclease activity: 0.002373	SH2 domain binding: 0.005222	endonuclease activity: 0.006572	phosphatidylinositol binding: 0.01219	guanyl-nucleotide exchange factor activity: 0.01592	RNA binding: 0.09431
1595	2	Q9NWA0, Q9NPJ6,	10.6667	2.4944	Q9NWA0, Q9NPJ6,	1	7.6667	3.3993	-3	1.23239	0.34302	ARC-L_complex::ARC_complex::CCNC-CDK8-MED1-MED6-MED7_xcomplex::Mediator_complex_1::Mediator_complex_2::hMediator_complex_(MED23,_CDK8,_CCNC)::hMediator_complex_(MED23,_CDK8,_CCNC,_MED7)::ARC92-Mediator_complex::Mediator_complex::CRSP-Mediator_2_complex::CRSP_complex::MED18-MED20-MED29_mediator_subcomplex::NAT_complex::TRAP-SMCC_mediator_complex::PC2_complex::SMCC_complex::TRAP_complex::DRIP_compl…	0.0476	42	ARC-L_complex::ARC_complex::CCNC-CDK8-MED1-MED6-MED7_xcomplex::Mediator_complex_1::Mediator_complex_2::hMediator_complex_(MED23,_CDK8,_CCNC)::hMediator_complex_(MED23,_CDK8,_CCNC,_MED7)::ARC92-Mediator_complex::Mediator_complex::CRSP-Mediator_2_complex::CRSP_complex::MED18-MED20-MED29_mediator_subcomplex::NAT_complex::TRAP-SMCC_mediator_complex::PC2_complex::SMCC_complex::TRAP_complex::DRIP_compl…	0.0476	42	RNA polymerase II transcription cofactor activity: 6.664e-06	vitamin D receptor binding: 0.001792	thyroid hormone receptor binding: 0.003823	ligand-dependent nuclear receptor transcription coactivator activity: 0.005608	transcription cofactor activity: 0.009121	receptor activity: 0.02612
617	2	Q8N7H5, P19784,	30.3333	2.4944	Q8N7H5, P19784,	1	34.6667	5.5578	4.3334	1.23207	0.343116	Paf_complex	0.1	5	Paf_complex	0.1	5	RNA polymerase II core binding: 0.001502	protein N-terminus binding: 0.01506	chromatin binding: 0.05062	protein kinase activity: 0.05461	protein serine/threonine kinase activity: 0.06063
566	2	P14859, P11142,	0	0	P14859, P11142,	1	0.6667	0.9428	0.6667	1.22482	0.345324	DNAJB2-HSPA8-PSMA3_complex	0.1667	3	DNAJB2-HSPA8-PSMA3_complex	0.1667	3	ATPase activity coupled: 0.002324	RNA polymerase II core promoter proximal region sequence-specific DNA binding transcription factor activity involved in positive regulation of transcription: 0.01176	unfolded protein binding: 0.01578	sequence-specific DNA binding: 0.06516
1469	2	Q9UIA9, O14980,	0.6667	0.9428	Q9UIA9, O14980,	1	0	0	-0.6667	1.22482	0.345324	Snurportin-CRM1-RanGTP_complex	0.1667	3	Snurportin-CRM1-RanGTP_complex	0.1667	3	Ran GTPase binding: 6.294e-06	nuclear export signal receptor activity: 0.0003878	protein transporter activity: 0.01176	protein domain specific binding: 0.0281	transporter activity: 0.03017	RNA binding: 0.09431
97	21	Q00839, P26368, Q15029, Q9UKM9, P38159, Q07955, O75533, Q15459, P62314, P61978, O43390, Q6P2Q9, O43290, P09661, Q01081, O75643, P23246, P07910, Q99459, P52272, Q9UMS4,	0	0	Q00839, P26368, Q15029, Q9UKM9, P38159, Q07955, O75533, Q15459, P62314, P61978, O43390, Q6P2Q9, O43290, P09661, Q01081, O75643, P23246, P07910, Q99459, P52272, Q9UMS4,	1	0.6667	0.9428	0.6667	1.22482	0.345324	(E.F.G)_complex::12S_U11_snRNP::6S_methyltransferase_and_RG-containing_Sm_proteins_complex::20S_methylosome-SmD_complex::20S_methylosome_and_RG-containing_Sm_protein_complex::6S_methyltransferase_complex::JBP1-pICln_complex::SMN_complex,_U7_snRNA_specific::20S_methyltransferase_complex::AR_coactivator_complex::17S_U2_snRNP::SF3A1-SF3A2-SF3A3_complex::SF3b_complex::Exon_junction_complex::SRm160/30…	0.0857	245	(E.F.G)_complex::12S_U11_snRNP::6S_methyltransferase_and_RG-containing_Sm_proteins_complex::20S_methylosome-SmD_complex::20S_methylosome_and_RG-containing_Sm_protein_complex::6S_methyltransferase_complex::JBP1-pICln_complex::SMN_complex,_U7_snRNA_specific::20S_methyltransferase_complex::AR_coactivator_complex::17S_U2_snRNP::SF3A1-SF3A2-SF3A3_complex::SF3b_complex::Exon_junction_complex::SRm160/30…	0.0857	245	RNA binding: 2.018e-17	nucleotide binding: 2.264e-09	protein binding: 4.217e-07	RS domain binding: 5.648e-05	WD40-repeat domain binding: 0.001526	U5 snRNA binding: 0.002033	nucleic acid binding: 0.003161	mRNA binding: 0.008477	ubiquitin-ubiquitin ligase activity: 0.01258	U6 snRNA binding: 0.01357	chromatin binding: 0.01451	C2H2 zinc finger domain binding: 0.01998	core promoter binding: 0.02727	identical protein binding: 0.03189	ATP-dependent RNA helicase activity: 0.0406	single-stranded RNA binding: 0.04388	RNA polymerase II core promoter proximal region sequence-specific DNA binding: 0.0626
1688	16	Q00839, Q53GS9, P26368, O00422, P55769, Q15459, Q01081, Q13243, O43290, P09661, P23246, O94906, P07910, Q13641, P52272, Q16629,	0.6667	0.9428	Q00839, Q53GS9, P26368, O00422, P55769, Q15459, Q01081, Q13243, O43290, P09661, P23246, O94906, P07910, Q13641, P52272, Q16629,	1	0	0	-0.6667	1.22482	0.345324	(E.F.G)_complex::12S_U11_snRNP::6S_methyltransferase_and_RG-containing_Sm_proteins_complex::20S_methylosome-SmD_complex::20S_methylosome_and_RG-containing_Sm_protein_complex::6S_methyltransferase_complex::JBP1-pICln_complex::SMN_complex,_U7_snRNA_specific::20S_methyltransferase_complex::AR_coactivator_complex::17S_U2_snRNP::SF3A1-SF3A2-SF3A3_complex::SF3b_complex::Exon_junction_complex::SRm160/30…	0.0574	245	(E.F.G)_complex::12S_U11_snRNP::6S_methyltransferase_and_RG-containing_Sm_proteins_complex::20S_methylosome-SmD_complex::20S_methylosome_and_RG-containing_Sm_protein_complex::6S_methyltransferase_complex::JBP1-pICln_complex::SMN_complex,_U7_snRNA_specific::20S_methyltransferase_complex::AR_coactivator_complex::17S_U2_snRNP::SF3A1-SF3A2-SF3A3_complex::SF3b_complex::Exon_junction_complex::SRm160/30…	0.0574	245	RNA binding: 3.21e-13	nucleotide binding: 1.224e-07	RS domain binding: 3.235e-05	protein binding: 0.0002402	snoRNA binding: 0.01151	C2H2 zinc finger domain binding: 0.01529	ribonucleoprotein complex binding: 0.02278	androgen receptor binding: 0.05994	nucleic acid binding: 0.08768	ubiquitin thiolesterase activity: 0.08982	mRNA binding: 0.09808
1145	2	P06576, P40926,	0	0	P06576, P40926,	1	0.6667	0.9428	0.6667	1.22482	0.345324	F1F0-ATP_synthase_(EC_3.6.3.14),_mitochondrial	0.0312	16	F1F0-ATP_synthase_(EC_3.6.3.14),_mitochondrial	0.0312	16	malate dehydrogenase (NADP+) activity: 0.0001454	L-malate dehydrogenase activity: 0.0005331	proton-transporting ATP synthase activity rotational mechanism: 0.001647	MHC class I protein binding: 0.002324	proton-transporting ATPase activity rotational mechanism: 0.002421	protein self-association: 0.004305	transmembrane transporter activity: 0.005415	ATPase activity: 0.02096	transporter activity: 0.03017
[truncated: 1,345 more rows]
[truncated: 8 more columns]

## Sheet: New Complexes
List of complexes identified only after bortezomib administration
Id	Size	List of proteins	Qualitative Prediction	Std. Dev.	Best matching reference complex	Matching thr.	Size of reference complex	Functions
[truncated: 180 more rows]
